# Supplementary material for: In Silico Molecular Docking and In Vitro Antidiabetic Studies of Dihydropyrimido[4,5-a]acridin-2-amines
Source: Biomed Res Int. 2014 Jun 2;2014:971569. doi: 10.1155/2014/971569 (PMC4060768; doi:10.1155/2014/971569)
Supplement: Supplementary file 1 — CCDC 988641 contains the supplementary crystallographic data for this paper. These data can be obtained free of charge from the Cambridge Crystallographic Data Centre via https://www.ccdc.cam.ac.uk/data-request/cif or from the Cambridge Crystallographic Data Centre, 12 Union Road, Cambridge CB2 1EZ, UK; fax: +44 1223 336033; or e-mail: deposit@ccdc.cam.ac.uk. [file 971569.f1.zip › 971569.f1/singlecrystalxrddata/ngc.cif.cif]

 
data_shelxl 
 
_audit_creation_method            SHELXL-97 
_chemical_name_systematic 
; 
 ? 
; 
_chemical_name_common             ? 
_chemical_melting_point           ? 
_chemical_formula_moiety          ? 
_chemical_formula_sum 
 'C27 H18 Cl2 N4' 
_chemical_formula_weight          469.35 
 
loop_ 
 _atom_type_symbol 
 _atom_type_description 
 _atom_type_scat_dispersion_real 
 _atom_type_scat_dispersion_imag 
 _atom_type_scat_source 
 'C'  'C'   0.0033   0.0016 
 'International Tables Vol C Tables 4.2.6.8 and 6.1.1.4' 
 'H'  'H'   0.0000   0.0000 
 'International Tables Vol C Tables 4.2.6.8 and 6.1.1.4' 
 'N'  'N'   0.0061   0.0033 
 'International Tables Vol C Tables 4.2.6.8 and 6.1.1.4' 
 'Cl'  'Cl'   0.1484   0.1585 
 'International Tables Vol C Tables 4.2.6.8 and 6.1.1.4' 
 
_symmetry_cell_setting            Triclinic 
_symmetry_space_group_name_H-M     P-1
 
loop_ 
 _symmetry_equiv_pos_as_xyz 
 'x, y, z' 
 '-x, -y, -z' 
 
_cell_length_a                    9.9421(5) 
_cell_length_b                    10.9553(5) 
_cell_length_c                    11.5126(5) 
_cell_angle_alpha                 67.248(2) 
_cell_angle_beta                  78.530(2) 
_cell_angle_gamma                 89.875(2) 
_cell_volume                      1129.39(9) 
_cell_formula_units_Z             2 
_cell_measurement_temperature     293(2) 
_cell_measurement_reflns_used     9204 
_cell_measurement_theta_min       2.097 
_cell_measurement_theta_max       29.582 
 
_exptl_crystal_description        BLOCK 
_exptl_crystal_colour             colourless 
_exptl_crystal_size_max           0.35 
_exptl_crystal_size_mid           0.30 
_exptl_crystal_size_min           0.25 
_exptl_crystal_density_meas       ? 
_exptl_crystal_density_diffrn     1.380 
_exptl_crystal_density_method     'not measured' 
_exptl_crystal_F_000              484 
_exptl_absorpt_coefficient_mu     0.311 
_exptl_absorpt_correction_type    multi-scan 
_exptl_absorpt_correction_T_min   0.8623 
_exptl_absorpt_correction_T_max   0.9635 
_exptl_absorpt_process_details    'SADABS (Bruker, 2004)' 
 
_exptl_special_details 
; 
 ? 
; 
 
_diffrn_ambient_temperature       293(2) 
_diffrn_radiation_wavelength      0.71073 
_diffrn_radiation_type            MoK\a 
_diffrn_radiation_source          'fine-focus sealed tube' 
_diffrn_radiation_monochromator   graphite 
_diffrn_measurement_device_type   'Bruker axs kappa apex2 CCD Diffractometer'
_diffrn_measurement_method        '\w and \f scan' 
_diffrn_detector_area_resol_mean  ? 
_diffrn_standards_number          ? 
_diffrn_standards_interval_count  ? 
_diffrn_standards_interval_time   ? 
_diffrn_standards_decay_%         ? 
_diffrn_reflns_number             19503 
_diffrn_reflns_av_R_equivalents   0.0276 
_diffrn_reflns_av_sigmaI/netI     0.0214 
_diffrn_reflns_limit_h_min        -11 
_diffrn_reflns_limit_h_max        11 
_diffrn_reflns_limit_k_min        -12 
_diffrn_reflns_limit_k_max        12 
_diffrn_reflns_limit_l_min        -13 
_diffrn_reflns_limit_l_max        13 
_diffrn_reflns_theta_min          1.96 
_diffrn_reflns_theta_max          25.00 
_reflns_number_total              3929 
_reflns_number_gt                 3119 
_reflns_threshold_expression      >2sigma(I) 
 
_computing_data_collection        'APEX2 (Bruker, 2004)'
_computing_cell_refinement        'APEX2/SAINT (Bruker, 2004)' 
_computing_data_reduction         'SAINT/XPREP (Bruker, 2004)'
_computing_structure_solution     'SIR92 (Altornare et al., 1993)'
_computing_structure_refinement   'SHELXL-97 (Sheldrick, 2008)'
_computing_molecular_graphics     
'ORTEP3 (Farrugia, 1997) and Mercury (Bruno et al., 2002)'
_computing_publication_material   'SHELXL-97 (Sheldrick, 2008)'


 
_refine_special_details 
; 
 Refinement of F^2^ against ALL reflections.  The weighted R-factor wR and 
 goodness of fit S are based on F^2^, conventional R-factors R are based 
 on F, with F set to zero for negative F^2^. The threshold expression of 
 F^2^ > 2sigma(F^2^) is used only for calculating R-factors(gt) etc. and is 
 not relevant to the choice of reflections for refinement.  R-factors based 
 on F^2^ are statistically about twice as large as those based on F, and R- 
 factors based on ALL data will be even larger. 
; 
 
_refine_ls_structure_factor_coef  Fsqd  
_refine_ls_matrix_type            full 
_refine_ls_weighting_scheme       calc  
_refine_ls_weighting_details 
 'calc w=1/[\s^2^(Fo^2^)+(0.0756P)^2^+1.3816P] where P=(Fo^2^+2Fc^2^)/3' 
_atom_sites_solution_primary      direct 
_atom_sites_solution_secondary    difmap 
_atom_sites_solution_hydrogens    geom 
_refine_ls_hydrogen_treatment     mixed 
_refine_ls_extinction_method      none 
_refine_ls_extinction_coef        ? 
_refine_ls_number_reflns          3929 
_refine_ls_number_parameters      308 
_refine_ls_number_restraints      6 
_refine_ls_R_factor_all           0.0712 
_refine_ls_R_factor_gt            0.0569 
_refine_ls_wR_factor_ref          0.2074 
_refine_ls_wR_factor_gt           0.1944 
_refine_ls_goodness_of_fit_ref    1.200 
_refine_ls_restrained_S_all       1.199 
_refine_ls_shift/su_max           0.000 
_refine_ls_shift/su_mean          0.000 
 
loop_ 
 _atom_site_label 
 _atom_site_type_symbol 
 _atom_site_fract_x 
 _atom_site_fract_y 
 _atom_site_fract_z 
 _atom_site_U_iso_or_equiv 
 _atom_site_adp_type 
 _atom_site_occupancy 
 _atom_site_symmetry_multiplicity 
 _atom_site_calc_flag 
 _atom_site_refinement_flags 
 _atom_site_disorder_assembly 
 _atom_site_disorder_group 
C1 C 0.3130(6) 0.1283(6) 0.4649(5) 0.0771(15) Uani 1 1 d . . . 
C2 C 0.3929(6) 0.2461(6) 0.3863(6) 0.0835(16) Uani 1 1 d . A . 
H2 H 0.3789 0.3219 0.4036 0.100 Uiso 1 1 calc R . . 
C3 C 0.4904(5) 0.2501(5) 0.2850(5) 0.0741(14) Uani 1 1 d . . . 
H3 H 0.5462 0.3281 0.2343 0.089 Uiso 1 1 calc R A . 
C4 C 0.5086(4) 0.1360(4) 0.2552(4) 0.0591(11) Uani 1 1 d . A . 
C5 C 0.4223(4) 0.0200(4) 0.3297(4) 0.0562(10) Uani 1 1 d . . . 
C6 C 0.3237(5) 0.0157(5) 0.4398(4) 0.0656(12) Uani 1 1 d . A . 
H6 H 0.2680 -0.0615 0.4933 0.079 Uiso 1 1 calc R . . 
C7 C 0.4369(4) -0.0909(4) 0.2932(4) 0.0496(9) Uani 1 1 d . A . 
C8 C 0.5406(4) -0.0786(4) 0.1887(4) 0.0489(9) Uani 1 1 d . . . 
C9 C 0.6280(4) 0.0412(4) 0.1249(4) 0.0556(10) Uani 1 1 d . A . 
C10 C 0.7447(4) 0.0532(4) 0.0156(4) 0.0620(11) Uani 1 1 d . . . 
H10A H 0.8141 0.1208 0.0051 0.074 Uiso 1 1 calc R A . 
H10B H 0.7113 0.0802 -0.0636 0.074 Uiso 1 1 calc R . . 
C11 C 0.8086(4) -0.0789(4) 0.0408(4) 0.0563(10) Uani 1 1 d . A . 
H11A H 0.8791 -0.0718 -0.0336 0.068 Uiso 1 1 calc R . . 
H11B H 0.8512 -0.1016 0.1145 0.068 Uiso 1 1 calc R . . 
C12 C 0.6975(4) -0.1854(4) 0.0668(4) 0.0469(8) Uani 1 1 d . . . 
C13 C 0.5666(3) -0.1828(3) 0.1356(3) 0.0449(8) Uani 1 1 d . A . 
C14 C 0.4870(3) -0.3575(3) 0.1027(3) 0.0448(8) Uani 1 1 d . A . 
C15 C 0.7137(3) -0.2852(3) 0.0196(3) 0.0433(8) Uani 1 1 d . A . 
C16 C 0.8473(3) -0.2938(3) -0.0611(3) 0.0454(8) Uani 1 1 d . . . 
C17 C 0.9682(4) -0.3220(3) -0.0185(4) 0.0478(8) Uani 1 1 d . A . 
C18 C 1.0908(4) -0.3221(4) -0.0996(4) 0.0590(10) Uani 1 1 d . . . 
H18 H 1.1708 -0.3425 -0.0682 0.071 Uiso 1 1 calc R A . 
C19 C 1.0927(4) -0.2917(5) -0.2270(5) 0.0744(13) Uani 1 1 d . A . 
H19 H 1.1752 -0.2892 -0.2830 0.089 Uiso 1 1 calc R . . 
C20 C 0.9741(5) -0.2648(6) -0.2725(5) 0.0802(14) Uani 1 1 d . . . 
H20 H 0.9758 -0.2458 -0.3588 0.096 Uiso 1 1 calc R A . 
C21 C 0.8532(4) -0.2661(5) -0.1906(4) 0.0640(11) Uani 1 1 d . A . 
H21 H 0.7731 -0.2480 -0.2223 0.077 Uiso 1 1 calc R . . 
C22 C 0.3448(4) -0.2133(4) 0.3698(4) 0.0526(9) Uani 1 1 d . . . 
C23 C 0.2063(4) -0.2141(5) 0.3676(5) 0.0723(12) Uani 1 1 d . A . 
H23 H 0.1715 -0.1378 0.3164 0.087 Uiso 1 1 calc R . . 
C24 C 0.1203(6) -0.3265(7) 0.4402(6) 0.0957(18) Uani 1 1 d . . . 
H24 H 0.0276 -0.3272 0.4368 0.115 Uiso 1 1 calc R A . 
C25 C 0.1703(8) -0.4367(7) 0.5170(6) 0.104(2) Uani 1 1 d . A . 
H25 H 0.1109 -0.5124 0.5666 0.125 Uiso 1 1 calc R . . 
C26 C 0.3053(7) -0.4390(6) 0.5232(5) 0.0926(17) Uani 1 1 d . . . 
H26 H 0.3380 -0.5151 0.5771 0.111 Uiso 1 1 calc R A . 
C27 C 0.3944(5) -0.3253(5) 0.4476(5) 0.0704(12) Uani 1 1 d . A . 
H27 H 0.4873 -0.3258 0.4501 0.084 Uiso 1 1 calc R . . 
N1 N 0.6118(3) 0.1463(3) 0.1537(4) 0.0622(9) Uani 1 1 d . . . 
N2 N 0.4611(3) -0.2670(3) 0.1534(3) 0.0463(7) Uani 1 1 d . . . 
N3 N 0.6093(3) -0.3712(3) 0.0360(3) 0.0470(7) Uani 1 1 d . . . 
N4 N 0.3800(3) -0.4431(3) 0.1192(3) 0.0584(9) Uani 1 1 d . . . 
H4A H 0.2998 -0.4375 0.1608 0.070 Uiso 1 1 calc R A . 
H4B H 0.3922 -0.5031 0.0880 0.070 Uiso 1 1 calc R . . 
Cl1 Cl 0.153(5) 0.092(4) 0.612(2) 0.096(5) Uani 0.29(6) 1 d PU A 1 
Cl1' Cl 0.205(2) 0.1319(16) 0.5958(8) 0.088(3) Uani 0.71(6) 1 d PU A 2 
Cl2 Cl 0.97059(13) -0.35973(12) 0.14175(10) 0.0735(4) Uani 1 1 d . . . 
 
loop_ 
 _atom_site_aniso_label 
 _atom_site_aniso_U_11 
 _atom_site_aniso_U_22 
 _atom_site_aniso_U_33 
 _atom_site_aniso_U_23 
 _atom_site_aniso_U_13 
 _atom_site_aniso_U_12 
C1 0.095(3) 0.111(4) 0.068(3) -0.068(3) -0.046(3) 0.059(3) 
C2 0.103(4) 0.091(4) 0.112(4) -0.080(4) -0.064(3) 0.050(3) 
C3 0.075(3) 0.075(3) 0.115(4) -0.070(3) -0.049(3) 0.031(2) 
C4 0.059(2) 0.062(2) 0.086(3) -0.051(2) -0.037(2) 0.0204(19) 
C5 0.056(2) 0.072(3) 0.066(3) -0.047(2) -0.0259(19) 0.022(2) 
C6 0.077(3) 0.082(3) 0.062(3) -0.047(2) -0.029(2) 0.035(2) 
C7 0.046(2) 0.058(2) 0.059(2) -0.0357(18) -0.0164(17) 0.0108(16) 
C8 0.0431(19) 0.053(2) 0.063(2) -0.0366(19) -0.0096(17) 0.0050(16) 
C9 0.049(2) 0.054(2) 0.078(3) -0.039(2) -0.0149(19) 0.0036(17) 
C10 0.051(2) 0.050(2) 0.085(3) -0.034(2) 0.003(2) -0.0073(17) 
C11 0.045(2) 0.057(2) 0.075(3) -0.041(2) 0.0004(18) -0.0070(17) 
C12 0.0424(19) 0.049(2) 0.055(2) -0.0306(17) -0.0044(16) -0.0022(15) 
C13 0.0436(19) 0.0463(19) 0.050(2) -0.0276(16) -0.0045(15) -0.0003(15) 
C14 0.0446(19) 0.0417(18) 0.050(2) -0.0248(15) -0.0004(15) -0.0050(14) 
C15 0.0396(18) 0.0471(19) 0.0460(19) -0.0242(16) -0.0030(15) 0.0003(14) 
C16 0.0416(19) 0.0478(19) 0.052(2) -0.0286(16) -0.0039(15) -0.0010(15) 
C17 0.049(2) 0.0447(19) 0.053(2) -0.0235(16) -0.0086(16) 0.0000(15) 
C18 0.042(2) 0.061(2) 0.077(3) -0.033(2) -0.0071(19) 0.0029(17) 
C19 0.048(2) 0.098(4) 0.081(3) -0.050(3) 0.007(2) 0.004(2) 
C20 0.070(3) 0.121(4) 0.060(3) -0.052(3) -0.004(2) 0.012(3) 
C21 0.049(2) 0.098(3) 0.058(2) -0.045(2) -0.0101(19) 0.009(2) 
C22 0.053(2) 0.066(2) 0.049(2) -0.0361(19) -0.0039(17) 0.0088(18) 
C23 0.053(3) 0.097(4) 0.072(3) -0.045(3) -0.002(2) 0.005(2) 
C24 0.065(3) 0.121(5) 0.096(4) -0.050(4) 0.009(3) -0.015(3) 
C25 0.107(5) 0.113(5) 0.079(4) -0.040(4) 0.019(4) -0.035(4) 
C26 0.134(5) 0.075(3) 0.070(3) -0.030(3) -0.021(3) 0.006(3) 
C27 0.080(3) 0.070(3) 0.072(3) -0.037(2) -0.023(2) 0.009(2) 
N1 0.056(2) 0.0536(19) 0.097(3) -0.0473(19) -0.0242(19) 0.0113(15) 
N2 0.0425(16) 0.0499(17) 0.0518(17) -0.0305(14) -0.0006(13) -0.0024(13) 
N3 0.0420(16) 0.0491(17) 0.0565(18) -0.0320(14) -0.0018(13) -0.0015(13) 
N4 0.0438(17) 0.0575(19) 0.082(2) -0.0456(18) 0.0074(16) -0.0105(14) 
Cl1 0.106(12) 0.120(10) 0.093(5) -0.080(6) -0.018(7) 0.038(9) 
Cl1' 0.109(5) 0.111(4) 0.071(2) -0.066(3) -0.020(2) 0.041(4) 
Cl2 0.0848(8) 0.0804(8) 0.0551(6) -0.0229(5) -0.0229(5) 0.0141(6) 
 
_geom_special_details 
; 
 All esds (except the esd in the dihedral angle between two l.s. planes) 
 are estimated using the full covariance matrix.  The cell esds are taken 
 into account individually in the estimation of esds in distances, angles 
 and torsion angles; correlations between esds in cell parameters are only 
 used when they are defined by crystal symmetry.  An approximate (isotropic) 
 treatment of cell esds is used for estimating esds involving l.s. planes. 
; 
 
loop_ 
 _geom_bond_atom_site_label_1 
 _geom_bond_atom_site_label_2 
 _geom_bond_distance 
 _geom_bond_site_symmetry_2 
 _geom_bond_publ_flag 
C1 C6 1.371(6) . ? 
C1 C2 1.389(8) . ? 
C1 Cl1' 1.681(11) . ? 
C1 Cl1 1.99(4) . ? 
C2 C3 1.347(7) . ? 
C2 H2 0.9300 . ? 
C3 C4 1.421(5) . ? 
C3 H3 0.9300 . ? 
C4 N1 1.361(6) . ? 
C4 C5 1.399(6) . ? 
C5 C6 1.424(6) . ? 
C5 C7 1.429(5) . ? 
C6 H6 0.9300 . ? 
C7 C8 1.383(5) . ? 
C7 C22 1.478(6) . ? 
C8 C9 1.423(5) . ? 
C8 C13 1.489(5) . ? 
C9 N1 1.317(5) . ? 
C9 C10 1.496(6) . ? 
C10 C11 1.525(6) . ? 
C10 H10A 0.9700 . ? 
C10 H10B 0.9700 . ? 
C11 C12 1.508(5) . ? 
C11 H11A 0.9700 . ? 
C11 H11B 0.9700 . ? 
C12 C13 1.388(5) . ? 
C12 C15 1.393(5) . ? 
C13 N2 1.330(4) . ? 
C14 N2 1.332(4) . ? 
C14 N3 1.344(4) . ? 
C14 N4 1.354(4) . ? 
C15 N3 1.339(4) . ? 
C15 C16 1.488(5) . ? 
C16 C17 1.377(5) . ? 
C16 C21 1.390(5) . ? 
C17 C18 1.380(5) . ? 
C17 Cl2 1.732(4) . ? 
C18 C19 1.368(6) . ? 
C18 H18 0.9300 . ? 
C19 C20 1.370(7) . ? 
C19 H19 0.9300 . ? 
C20 C21 1.369(6) . ? 
C20 H20 0.9300 . ? 
C21 H21 0.9300 . ? 
C22 C27 1.369(6) . ? 
C22 C23 1.382(6) . ? 
C23 C24 1.368(8) . ? 
C23 H23 0.9300 . ? 
C24 C25 1.354(9) . ? 
C24 H24 0.9300 . ? 
C25 C26 1.358(9) . ? 
C25 H25 0.9300 . ? 
C26 C27 1.397(7) . ? 
C26 H26 0.9300 . ? 
C27 H27 0.9300 . ? 
N4 H4A 0.8600 . ? 
N4 H4B 0.8600 . ? 
 
loop_ 
 _geom_angle_atom_site_label_1 
 _geom_angle_atom_site_label_2 
 _geom_angle_atom_site_label_3 
 _geom_angle 
 _geom_angle_site_symmetry_1 
 _geom_angle_site_symmetry_3 
 _geom_angle_publ_flag 
C6 C1 C2 122.6(5) . . ? 
C6 C1 Cl1' 122.1(9) . . ? 
C2 C1 Cl1' 115.3(8) . . ? 
C6 C1 Cl1 107.1(14) . . ? 
C2 C1 Cl1 129.8(13) . . ? 
Cl1' C1 Cl1 17.0(7) . . ? 
C3 C2 C1 119.8(4) . . ? 
C3 C2 H2 120.1 . . ? 
C1 C2 H2 120.1 . . ? 
C2 C3 C4 120.4(5) . . ? 
C2 C3 H3 119.8 . . ? 
C4 C3 H3 119.8 . . ? 
N1 C4 C5 123.2(3) . . ? 
N1 C4 C3 117.1(4) . . ? 
C5 C4 C3 119.7(4) . . ? 
C4 C5 C6 119.1(4) . . ? 
C4 C5 C7 118.7(4) . . ? 
C6 C5 C7 122.2(4) . . ? 
C1 C6 C5 118.3(5) . . ? 
C1 C6 H6 120.8 . . ? 
C5 C6 H6 120.8 . . ? 
C8 C7 C5 117.5(4) . . ? 
C8 C7 C22 123.2(3) . . ? 
C5 C7 C22 119.3(3) . . ? 
C7 C8 C9 118.9(3) . . ? 
C7 C8 C13 124.2(3) . . ? 
C9 C8 C13 116.8(3) . . ? 
N1 C9 C8 124.1(4) . . ? 
N1 C9 C10 116.4(3) . . ? 
C8 C9 C10 119.4(3) . . ? 
C9 C10 C11 110.7(3) . . ? 
C9 C10 H10A 109.5 . . ? 
C11 C10 H10A 109.5 . . ? 
C9 C10 H10B 109.5 . . ? 
C11 C10 H10B 109.5 . . ? 
H10A C10 H10B 108.1 . . ? 
C12 C11 C10 109.0(3) . . ? 
C12 C11 H11A 109.9 . . ? 
C10 C11 H11A 109.9 . . ? 
C12 C11 H11B 109.9 . . ? 
C10 C11 H11B 109.9 . . ? 
H11A C11 H11B 108.3 . . ? 
C13 C12 C15 115.8(3) . . ? 
C13 C12 C11 119.7(3) . . ? 
C15 C12 C11 124.3(3) . . ? 
N2 C13 C12 123.0(3) . . ? 
N2 C13 C8 117.8(3) . . ? 
C12 C13 C8 119.1(3) . . ? 
N2 C14 N3 126.1(3) . . ? 
N2 C14 N4 117.0(3) . . ? 
N3 C14 N4 116.9(3) . . ? 
N3 C15 C12 122.4(3) . . ? 
N3 C15 C16 116.7(3) . . ? 
C12 C15 C16 120.7(3) . . ? 
C17 C16 C21 117.0(3) . . ? 
C17 C16 C15 124.8(3) . . ? 
C21 C16 C15 118.2(3) . . ? 
C16 C17 C18 122.2(4) . . ? 
C16 C17 Cl2 120.3(3) . . ? 
C18 C17 Cl2 117.5(3) . . ? 
C19 C18 C17 119.0(4) . . ? 
C19 C18 H18 120.5 . . ? 
C17 C18 H18 120.5 . . ? 
C18 C19 C20 120.5(4) . . ? 
C18 C19 H19 119.8 . . ? 
C20 C19 H19 119.8 . . ? 
C21 C20 C19 119.8(4) . . ? 
C21 C20 H20 120.1 . . ? 
C19 C20 H20 120.1 . . ? 
C20 C21 C16 121.5(4) . . ? 
C20 C21 H21 119.2 . . ? 
C16 C21 H21 119.2 . . ? 
C27 C22 C23 119.3(4) . . ? 
C27 C22 C7 120.4(4) . . ? 
C23 C22 C7 120.2(4) . . ? 
C24 C23 C22 120.3(5) . . ? 
C24 C23 H23 119.8 . . ? 
C22 C23 H23 119.8 . . ? 
C25 C24 C23 119.9(6) . . ? 
C25 C24 H24 120.1 . . ? 
C23 C24 H24 120.1 . . ? 
C24 C25 C26 121.4(6) . . ? 
C24 C25 H25 119.3 . . ? 
C26 C25 H25 119.3 . . ? 
C25 C26 C27 119.1(6) . . ? 
C25 C26 H26 120.5 . . ? 
C27 C26 H26 120.5 . . ? 
C22 C27 C26 119.9(5) . . ? 
C22 C27 H27 120.0 . . ? 
C26 C27 H27 120.0 . . ? 
C9 N1 C4 117.3(4) . . ? 
C13 N2 C14 116.4(3) . . ? 
C15 N3 C14 116.2(3) . . ? 
C14 N4 H4A 120.0 . . ? 
C14 N4 H4B 120.0 . . ? 
H4A N4 H4B 120.0 . . ? 
 
loop_ 
 _geom_torsion_atom_site_label_1 
 _geom_torsion_atom_site_label_2 
 _geom_torsion_atom_site_label_3 
 _geom_torsion_atom_site_label_4 
 _geom_torsion 
 _geom_torsion_site_symmetry_1 
 _geom_torsion_site_symmetry_2 
 _geom_torsion_site_symmetry_3 
 _geom_torsion_site_symmetry_4 
 _geom_torsion_publ_flag 
C6 C1 C2 C3 -3.8(7) . . . . ? 
Cl1' C1 C2 C3 174.6(6) . . . . ? 
Cl1 C1 C2 C3 -174.8(12) . . . . ? 
C1 C2 C3 C4 2.4(7) . . . . ? 
C2 C3 C4 N1 -178.2(4) . . . . ? 
C2 C3 C4 C5 1.6(6) . . . . ? 
N1 C4 C5 C6 175.4(4) . . . . ? 
C3 C4 C5 C6 -4.3(6) . . . . ? 
N1 C4 C5 C7 -4.0(6) . . . . ? 
C3 C4 C5 C7 176.2(4) . . . . ? 
C2 C1 C6 C5 1.0(6) . . . . ? 
Cl1' C1 C6 C5 -177.3(6) . . . . ? 
Cl1 C1 C6 C5 173.8(8) . . . . ? 
C4 C5 C6 C1 3.0(6) . . . . ? 
C7 C5 C6 C1 -177.5(4) . . . . ? 
C4 C5 C7 C8 2.8(5) . . . . ? 
C6 C5 C7 C8 -176.7(4) . . . . ? 
C4 C5 C7 C22 -179.0(3) . . . . ? 
C6 C5 C7 C22 1.6(6) . . . . ? 
C5 C7 C8 C9 1.1(5) . . . . ? 
C22 C7 C8 C9 -177.1(4) . . . . ? 
C5 C7 C8 C13 -177.9(3) . . . . ? 
C22 C7 C8 C13 4.0(6) . . . . ? 
C7 C8 C9 N1 -4.4(6) . . . . ? 
C13 C8 C9 N1 174.6(4) . . . . ? 
C7 C8 C9 C10 177.2(4) . . . . ? 
C13 C8 C9 C10 -3.8(5) . . . . ? 
N1 C9 C10 C11 144.9(4) . . . . ? 
C8 C9 C10 C11 -36.5(5) . . . . ? 
C9 C10 C11 C12 55.0(5) . . . . ? 
C10 C11 C12 C13 -36.9(5) . . . . ? 
C10 C11 C12 C15 139.2(4) . . . . ? 
C15 C12 C13 N2 -1.9(6) . . . . ? 
C11 C12 C13 N2 174.6(4) . . . . ? 
C15 C12 C13 C8 -179.7(3) . . . . ? 
C11 C12 C13 C8 -3.3(5) . . . . ? 
C7 C8 C13 N2 26.3(6) . . . . ? 
C9 C8 C13 N2 -152.6(4) . . . . ? 
C7 C8 C13 C12 -155.7(4) . . . . ? 
C9 C8 C13 C12 25.3(5) . . . . ? 
C13 C12 C15 N3 1.9(6) . . . . ? 
C11 C12 C15 N3 -174.3(4) . . . . ? 
C13 C12 C15 C16 176.9(3) . . . . ? 
C11 C12 C15 C16 0.7(6) . . . . ? 
N3 C15 C16 C17 -118.8(4) . . . . ? 
C12 C15 C16 C17 65.9(5) . . . . ? 
N3 C15 C16 C21 64.0(5) . . . . ? 
C12 C15 C16 C21 -111.3(4) . . . . ? 
C21 C16 C17 C18 0.5(5) . . . . ? 
C15 C16 C17 C18 -176.7(3) . . . . ? 
C21 C16 C17 Cl2 -179.2(3) . . . . ? 
C15 C16 C17 Cl2 3.6(5) . . . . ? 
C16 C17 C18 C19 0.8(6) . . . . ? 
Cl2 C17 C18 C19 -179.5(3) . . . . ? 
C17 C18 C19 C20 -1.6(7) . . . . ? 
C18 C19 C20 C21 1.2(8) . . . . ? 
C19 C20 C21 C16 0.2(8) . . . . ? 
C17 C16 C21 C20 -1.0(6) . . . . ? 
C15 C16 C21 C20 176.4(4) . . . . ? 
C8 C7 C22 C27 69.8(5) . . . . ? 
C5 C7 C22 C27 -108.4(4) . . . . ? 
C8 C7 C22 C23 -112.8(4) . . . . ? 
C5 C7 C22 C23 69.0(5) . . . . ? 
C27 C22 C23 C24 -1.4(7) . . . . ? 
C7 C22 C23 C24 -178.8(4) . . . . ? 
C22 C23 C24 C25 1.5(8) . . . . ? 
C23 C24 C25 C26 -0.5(9) . . . . ? 
C24 C25 C26 C27 -0.6(9) . . . . ? 
C23 C22 C27 C26 0.2(6) . . . . ? 
C7 C22 C27 C26 177.6(4) . . . . ? 
C25 C26 C27 C22 0.8(8) . . . . ? 
C8 C9 N1 C4 3.3(6) . . . . ? 
C10 C9 N1 C4 -178.2(4) . . . . ? 
C5 C4 N1 C9 1.0(6) . . . . ? 
C3 C4 N1 C9 -179.3(4) . . . . ? 
C12 C13 N2 C14 0.9(5) . . . . ? 
C8 C13 N2 C14 178.8(3) . . . . ? 
N3 C14 N2 C13 0.1(6) . . . . ? 
N4 C14 N2 C13 -179.4(3) . . . . ? 
C12 C15 N3 C14 -1.0(5) . . . . ? 
C16 C15 N3 C14 -176.2(3) . . . . ? 
N2 C14 N3 C15 -0.1(6) . . . . ? 
N4 C14 N3 C15 179.5(3) . . . . ? 
 
_diffrn_measured_fraction_theta_max    0.988 
_diffrn_reflns_theta_full              25.00 
_diffrn_measured_fraction_theta_full   0.988 
_refine_diff_density_max    0.383 
_refine_diff_density_min   -0.385 
_refine_diff_density_rms    0.055 
