# Supplementary material for: In Silico Molecular Docking and In Vitro Antidiabetic Studies of Dihydropyrimido[4,5-a]acridin-2-amines
Source: Biomed Res Int. 2014 Jun 2;2014:971569. doi: 10.1155/2014/971569 (PMC4060768; doi:10.1155/2014/971569)
Supplement: Supplementary file 1 — CCDC 988641 contains the supplementary crystallographic data for this paper. These data can be obtained free of charge from the Cambridge Crystallographic Data Centre via https://www.ccdc.cam.ac.uk/data-request/cif or from the Cambridge Crystallographic Data Centre, 12 Union Road, Cambridge CB2 1EZ, UK; fax: +44 1223 336033; or e-mail: deposit@ccdc.cam.ac.uk. [file 971569.f1.zip › 971569.f1/singlecrystalxrddata/ngc.fcf]

# 
# h,k,l, Fc-squared, Fo-squared, sigma(Fo-squared) and status flag 
# 
data_shelxl 
_shelx_title ' NGC in P-1' 
_shelx_refln_list_code          4 
_shelx_F_calc_maximum      158.25 
_exptl_crystal_F_000       484.00 
_reflns_d_resolution_high  0.8409 
 
loop_ 
 _symmetry_equiv_pos_as_xyz 
 'x, y, z' 
 '-x, -y, -z' 
 
_cell_length_a     9.9421 
_cell_length_b    10.9553 
_cell_length_c    11.5126 
_cell_angle_alpha  67.248 
_cell_angle_beta   78.530 
_cell_angle_gamma  89.875 
 
_shelx_F_squared_multiplier     1.000 
 
loop_ 
 _refln_index_h 
 _refln_index_k 
 _refln_index_l 
 _refln_F_squared_calc 
 _refln_F_squared_meas 
 _refln_F_squared_sigma 
 _refln_observed_status 
   1   0   0     2395.06     1690.59     25.05 o 
   2   0   0      859.51      727.83      7.06 o 
   3   0   0       19.69       22.86      0.48 o 
   4   0   0       86.57      115.53      1.47 o 
   5   0   0      384.64      392.74      4.83 o 
   6   0   0      163.54      172.84      2.56 o 
   7   0   0       11.89       11.62      0.74 o 
   8   0   0        1.35        3.93      0.82 o 
   9   0   0       26.97       31.40      1.78 o 
  10   0   0       16.80       18.17      2.21 o 
  11   0   0        0.78        1.78      3.21 o 
 -11   1   0        6.23        3.99      1.70 o 
 -10   1   0       17.87       16.78      2.20 o 
  -9   1   0       76.95       80.70      2.62 o 
  -8   1   0      166.87      158.08      3.06 o 
  -7   1   0      325.94      303.01      4.69 o 
  -6   1   0       35.26       23.28      0.99 o 
  -5   1   0      101.02      106.65      1.56 o 
  -4   1   0      186.27      229.87      2.66 o 
  -3   1   0     1729.82     1664.81     15.31 o 
  -2   1   0      668.92      546.92      5.60 o 
  -1   1   0     1123.61      957.97     16.48 o 
   1   1   0     5775.63     5639.01     52.05 o 
   2   1   0     2935.43     3007.76     27.37 o 
   3   1   0      133.34      134.60      1.61 o 
   4   1   0        0.43       -0.36      0.26 o 
   5   1   0       17.17       17.94      0.63 o 
   6   1   0      101.17       85.47      1.60 o 
   7   1   0      253.57      257.20      3.62 o 
   8   1   0      934.43      948.08     13.82 o 
   9   1   0       14.62       16.59      1.57 o 
  10   1   0       60.99       79.52      4.34 o 
  11   1   0        0.65        1.97      3.93 o 
 -11   2   0        1.28        2.32      1.77 o 
 -10   2   0       22.23       30.27      2.49 o 
  -9   2   0      110.89      113.56      3.13 o 
  -8   2   0      284.22      279.46      4.57 o 
  -7   2   0        3.17        5.01      0.74 o 
  -6   2   0      704.29      743.77      8.77 o 
  -5   2   0       16.11        3.36      0.47 o 
  -4   2   0      887.93      882.50     10.06 o 
  -3   2   0        0.12        0.84      0.19 o 
  -2   2   0      322.67      294.08      2.98 o 
  -1   2   0      149.49      178.87      1.89 o 
   0   2   0     4573.67     4898.59     52.60 o 
   1   2   0     3633.84     3589.40     35.91 o 
   2   2   0     2955.94     2859.83     28.28 o 
   3   2   0      454.00      474.19      5.21 o 
   4   2   0      117.07       89.24      1.34 o 
   5   2   0      411.95      403.16      4.94 o 
   6   2   0      174.85      160.18      2.42 o 
   7   2   0       19.22       19.72      0.92 o 
   8   2   0      179.39      170.69      4.09 o 
   9   2   0       69.74       81.14      2.85 o 
  10   2   0        1.49        1.01      1.32 o 
  11   2   0        0.71        2.15      3.04 o 
 -11   3   0        3.29        5.82      2.15 o 
 -10   3   0        0.07        0.27      1.46 o 
  -9   3   0       57.14       58.78      2.32 o 
  -8   3   0       27.33       30.07      1.45 o 
  -7   3   0      315.13      296.30      5.39 o 
  -6   3   0        5.96        6.52      0.62 o 
  -5   3   0        0.32       -0.58      0.39 o 
  -4   3   0       48.35       59.85      1.12 o 
  -3   3   0      296.33      261.76      3.04 o 
  -2   3   0     5622.45     5349.86     61.77 o 
  -1   3   0      955.27      873.22     10.30 o 
   0   3   0     1953.96     2047.83     25.93 o 
   1   3   0     2121.55     1989.33     20.87 o 
   2   3   0      505.96      472.68      5.42 o 
   3   3   0       66.34       61.97      1.00 o 
   4   3   0       74.23       65.12      1.10 o 
   5   3   0       87.13       86.80      1.55 o 
   6   3   0       57.22       53.30      1.30 o 
   7   3   0       11.08        5.77      0.78 o 
   8   3   0      343.62      374.89      6.98 o 
   9   3   0        1.06        1.88      1.08 o 
  10   3   0        5.28        3.58      1.56 o 
 -11   4   0       12.59       11.23      2.93 o 
 -10   4   0       12.91       14.06      1.98 o 
  -9   4   0       62.89       62.20      2.36 o 
  -8   4   0       78.11       83.82      2.52 o 
  -7   4   0      296.77      290.96      4.03 o 
  -6   4   0       68.19       66.90      1.51 o 
  -5   4   0      651.02      609.18      7.21 o 
  -4   4   0      158.44      144.63      1.96 o 
  -3   4   0        3.19        2.48      0.37 o 
  -2   4   0       24.73       30.88      2.93 o 
  -1   4   0        3.60        3.69      0.28 o 
   0   4   0      425.05      463.30      5.57 o 
   1   4   0      650.63      622.87      7.70 o 
   2   4   0      369.14      459.60      7.41 o 
   3   4   0       42.15       53.49      1.11 o 
   4   4   0       17.10       19.07      1.14 o 
   5   4   0        0.11       -0.61      0.41 o 
   6   4   0      194.82      203.99      3.66 o 
   7   4   0       68.63       78.69      2.08 o 
   8   4   0       80.35       97.16      2.88 o 
   9   4   0        1.74        3.76      1.46 o 
  10   4   0        7.14        8.87      2.76 o 
 -10   5   0        6.88        9.28      2.54 o 
  -9   5   0        0.02       -0.91      1.02 o 
  -8   5   0        0.81        0.51      0.98 o 
  -7   5   0       88.70       85.97      2.43 o 
  -6   5   0      189.09      191.19      2.87 o 
  -5   5   0       13.10       12.54      0.73 o 
  -4   5   0      134.09      150.50      2.52 o 
  -3   5   0     1339.51     1319.04     18.05 o 
  -1   5   0     1058.89     1071.28     13.50 o 
   0   5   0      585.66      627.44      7.51 o 
   1   5   0        0.02       -0.07      0.29 o 
   2   5   0      153.70      225.61      3.00 o 
   3   5   0      287.42      299.29      3.92 o 
   4   5   0       44.49       37.55      0.96 o 
   5   5   0      138.52      125.69      2.32 o 
   6   5   0      124.05      121.36      2.40 o 
   7   5   0        0.58       -1.11      0.93 o 
   8   5   0        8.22        8.47      1.35 o 
   9   5   0       10.35       16.45      2.05 o 
  10   5   0        3.75        4.38      1.65 o 
 -10   6   0       20.37       17.21      2.92 o 
  -9   6   0        1.00       -1.11      1.40 o 
  -8   6   0        6.36        4.39      1.41 o 
  -7   6   0       15.78       18.26      2.27 o 
  -6   6   0        6.39        3.03      0.90 o 
  -5   6   0      103.65      104.80      2.11 o 
  -4   6   0        0.97       -0.17      0.37 o 
  -3   6   0     1955.25     1964.75     24.70 o 
  -2   6   0       20.45       81.75      3.76 o 
  -1   6   0       12.82        9.22      0.50 o 
   0   6   0        7.76        8.08      0.44 o 
   1   6   0      119.37      120.23      1.74 o 
   2   6   0      418.01      419.85      5.25 o 
   3   6   0       67.63       78.49      1.43 o 
   4   6   0        7.43        6.15      0.52 o 
   5   6   0       35.86       28.78      1.02 o 
   6   6   0       24.30       24.02      1.21 o 
   7   6   0        1.18        2.37      1.11 o 
   8   6   0        0.69        2.67      1.32 o 
   9   6   0        9.98       16.51      1.90 o 
  -9   7   0       12.29       10.23      1.94 o 
  -8   7   0        0.49       -2.01      1.34 o 
  -7   7   0       67.32       63.23      3.16 o 
  -6   7   0       67.92       67.47      4.76 o 
  -5   7   0        2.77        1.32      0.50 o 
  -4   7   0       44.07       46.93      1.33 o 
  -3   7   0       52.25       53.06      1.29 o 
  -2   7   0      243.33      241.41      3.88 o 
  -1   7   0      286.66      253.29      3.91 o 
   0   7   0        0.38       -0.49      0.33 o 
   1   7   0       46.42       44.99      0.95 o 
   2   7   0       41.30       42.24      0.96 o 
   3   7   0        1.02        0.31      0.38 o 
   4   7   0       48.11       51.36      1.33 o 
   5   7   0      112.96      108.58      2.18 o 
   6   7   0       36.35       27.22      1.50 o 
   7   7   0       24.39       26.87      1.79 o 
   8   7   0        0.24        0.72      1.26 o 
  -9   8   0       40.63       46.45      2.99 o 
  -8   8   0        1.83       -2.17      1.44 o 
  -7   8   0       16.78       15.31      2.03 o 
  -6   8   0        0.30       -3.22      2.15 o 
  -5   8   0        0.27       -0.87      0.77 o 
  -4   8   0       24.74       21.94      1.11 o 
  -3   8   0       43.90       37.05      1.23 o 
  -2   8   0       43.73       41.32      1.22 o 
  -1   8   0        1.17        3.05      0.47 o 
   0   8   0        0.83        0.99      0.63 o 
   1   8   0       35.72       34.71      1.12 o 
   2   8   0      107.49      140.79      2.50 o 
   3   8   0        0.97       -0.09      0.46 o 
   4   8   0       27.28       27.60      1.02 o 
   5   8   0       20.10       25.34      1.21 o 
   6   8   0       55.02       49.67      2.65 o 
   7   8   0        3.37        1.85      1.23 o 
  -8   9   0        0.81       -0.37      1.53 o 
  -7   9   0       15.08       11.43      1.83 o 
  -6   9   0       68.33       62.16      3.93 o 
  -5   9   0       10.62       12.39      1.27 o 
  -4   9   0        5.29        3.36      0.83 o 
  -3   9   0       24.72       23.17      1.05 o 
  -2   9   0        4.45       17.19      3.58 o 
  -1   9   0       13.58       18.64      1.51 o 
   0   9   0        0.63       -1.21      0.80 o 
   1   9   0        5.46        5.01      0.80 o 
   2   9   0        0.02       20.91      2.12 o 
   3   9   0        0.04       -0.79      0.52 o 
   4   9   0       38.46       37.65      1.22 o 
   5   9   0        3.91        2.70      0.83 o 
   6   9   0        4.85        8.50      1.39 o 
  -7  10   0       34.14       35.07      2.49 o 
  -6  10   0        2.76        2.56      1.38 o 
  -5  10   0        0.92       -1.62      1.08 o 
  -4  10   0       16.55       15.48      1.28 o 
  -3  10   0       28.53       32.55      1.39 o 
  -2  10   0       13.14       24.44      2.54 o 
  -1  10   0       10.87       11.74      1.07 o 
   0  10   0       35.24       39.90      2.66 o 
   1  10   0       90.28       87.36      2.40 o 
   2  10   0       33.39       33.89      1.44 o 
   3  10   0        1.09       -0.63      0.68 o 
   4  10   0        4.71        4.33      1.03 o 
   5  10   0       18.94       18.36      1.93 o 
  -5  11   0        2.56        0.86      1.25 o 
  -4  11   0        4.16        3.30      1.11 o 
  -3  11   0        0.70       -0.39      1.06 o 
  -2  11   0        1.16        1.16      0.87 o 
  -1  11   0        0.90        1.68      0.85 o 
   0  11   0       21.95       31.59      1.52 o 
   1  11   0       40.39       40.95      1.73 o 
   2  11   0       26.46       28.53      1.48 o 
   3  11   0        2.75        3.06      1.12 o 
  -1  12   0        3.44        1.70      1.20 o 
  -2 -11   1        5.02        4.27      1.53 o 
  -1 -11   1       17.11       13.95      1.54 o 
   0 -11   1       26.65       30.18      1.92 o 
   1 -11   1        3.43        1.79      1.21 o 
   2 -11   1        4.00        9.96      1.72 o 
   3 -11   1        2.22        1.22      1.03 o 
   4 -11   1        7.85        6.02      1.36 o 
  -4 -10   1        1.44        1.29      0.84 o 
  -3 -10   1        1.49        1.79      0.81 o 
  -2 -10   1        0.00        1.04      0.74 o 
  -1 -10   1       10.95       12.14      1.12 o 
   0 -10   1       12.83       14.81      1.13 o 
   1 -10   1       62.53       68.25      1.78 o 
   2 -10   1       21.48       26.23      1.33 o 
   3 -10   1       11.52        8.50      1.25 o 
   4 -10   1        1.66        0.57      1.08 o 
   5 -10   1        5.43        4.25      1.38 o 
   6 -10   1       10.67       11.36      1.75 o 
  -6  -9   1        1.42        2.83      1.33 o 
  -5  -9   1        0.83       -0.42      0.96 o 
  -4  -9   1       19.96       24.21      2.36 o 
  -3  -9   1        0.24        0.06      0.58 o 
  -2  -9   1        6.32        7.41      0.70 o 
  -1  -9   1       37.77       31.94      1.11 o 
   0  -9   1       40.33       37.31      1.20 o 
   1  -9   1      232.52      228.28      4.37 o 
   2  -9   1      248.67      242.42      4.76 o 
   3  -9   1       15.38       15.20      1.09 o 
   4  -9   1        4.53        4.34      1.02 o 
   5  -9   1        0.81       -1.56      1.04 o 
   6  -9   1        0.39       -1.78      1.19 o 
   7  -9   1        4.84        4.64      1.56 o 
   8  -9   1        4.46        6.51      1.79 o 
  -7  -8   1        0.50        1.14      1.26 o 
  -6  -8   1        5.58        7.30      1.31 o 
  -5  -8   1       51.74       50.48      2.01 o 
  -4  -8   1       34.39       35.36      1.82 o 
  -3  -8   1       18.11       16.59      0.87 o 
  -2  -8   1       22.62       22.15      0.83 o 
  -1  -8   1        2.93        2.15      0.57 o 
   0  -8   1       76.85       78.32      1.62 o 
   1  -8   1       50.89       39.90      1.34 o 
   2  -8   1      336.20      344.55      6.85 o 
   3  -8   1       17.85       20.98      1.14 o 
   4  -8   1        0.00       -1.02      0.68 o 
   5  -8   1        0.28       -0.75      0.90 o 
   6  -8   1        7.30        2.49      1.35 o 
   7  -8   1        2.52       -0.94      1.82 o 
   8  -8   1       59.06       50.90      2.99 o 
   9  -8   1        1.33        1.06      1.69 o 
  -8  -7   1        0.53        0.04      1.23 o 
  -7  -7   1        2.10        2.42      1.27 o 
  -6  -7   1        0.75        1.08      1.05 o 
  -5  -7   1        0.68        3.62      0.77 o 
  -4  -7   1       41.42       41.09      1.30 o 
  -3  -7   1        7.12        4.94      0.60 o 
  -2  -7   1        3.94        6.29      0.53 o 
  -1  -7   1       10.83        5.59      0.55 o 
   0  -7   1       52.47       51.41      1.13 o 
   1  -7   1        0.33        0.68      0.40 o 
   2  -7   1        5.53        9.40      0.73 o 
   3  -7   1       78.54       83.28      1.74 o 
   4  -7   1      200.55      180.78      3.04 o 
   5  -7   1        5.65        4.54      0.81 o 
   6  -7   1       37.13       38.17      2.27 o 
   7  -7   1        5.32       -0.75      1.35 o 
   8  -7   1        7.79        4.85      1.69 o 
   9  -7   1        7.11        6.80      1.89 o 
  -9  -6   1        2.92        1.26      1.49 o 
  -8  -6   1        0.15       -0.67      1.12 o 
  -7  -6   1        0.78       -1.12      0.95 o 
  -6  -6   1       90.03       84.59      2.78 o 
  -5  -6   1        8.95        7.52      0.79 o 
  -4  -6   1        0.00       -0.44      0.44 o 
  -3  -6   1       97.99       99.06      1.76 o 
  -2  -6   1       44.57       44.67      1.05 o 
  -1  -6   1      109.87      111.93      1.66 o 
   0  -6   1       56.85       61.23      1.17 o 
   1  -6   1       65.86       54.43      1.09 o 
   2  -6   1       53.64      102.76      2.27 o 
   3  -6   1      303.42      276.26      4.08 o 
   4  -6   1       20.37       16.34      0.91 o 
   5  -6   1      133.04      135.91      2.54 o 
   6  -6   1       62.52       65.05      1.93 o 
   7  -6   1       31.97       35.23      1.98 o 
   8  -6   1        5.12        0.98      1.22 o 
   9  -6   1        4.12        3.25      1.58 o 
  10  -6   1        2.94       -1.52      2.12 o 
  -9  -5   1        4.41        9.58      1.70 o 
  -8  -5   1        6.86        6.03      1.44 o 
  -7  -5   1       11.23        7.97      1.26 o 
  -6  -5   1       36.39       38.36      1.41 o 
  -5  -5   1       80.09       75.53      1.77 o 
  -4  -5   1       81.58       83.67      1.74 o 
  -3  -5   1      385.54      424.06      5.45 o 
  -2  -5   1        1.13       34.10      1.68 o 
  -1  -5   1      163.63      141.01      2.04 o 
   0  -5   1       97.10       86.93      1.39 o 
   1  -5   1       34.07       21.67      0.64 o 
   2  -5   1      431.84      455.39      6.10 o 
   3  -5   1       53.98       49.84      1.93 o 
   4  -5   1        0.66        3.41      0.54 o 
   5  -5   1       90.43       76.37      1.62 o 
   6  -5   1       58.36       64.42      1.72 o 
   7  -5   1       68.66       65.17      2.05 o 
   8  -5   1        3.20        0.14      0.94 o 
   9  -5   1       27.34       30.59      2.10 o 
  10  -5   1        7.46        5.72      2.86 o 
 -10  -4   1        0.54        0.64      1.49 o 
  -9  -4   1        2.24        2.02      1.35 o 
  -8  -4   1       14.19       18.15      1.65 o 
  -7  -4   1       53.58       49.70      2.04 o 
  -6  -4   1       30.53       31.98      1.18 o 
  -5  -4   1        0.51        0.63      0.49 o 
  -4  -4   1      184.68      186.83      2.64 o 
  -3  -4   1       20.34        8.04      0.53 o 
  -2  -4   1     1410.81     1466.08     17.30 o 
  -1  -4   1     1180.76     1294.18     15.27 o 
   0  -4   1       24.92       32.52      0.71 o 
   1  -4   1      454.32      397.29      4.90 o 
   2  -4   1      881.48      846.60     10.84 o 
   3  -4   1      236.62      205.95      2.68 o 
   4  -4   1       58.14       69.63      2.14 o 
   5  -4   1      202.04      187.19      2.65 o 
   6  -4   1       17.85       14.20      0.74 o 
   7  -4   1       69.53       63.09      1.57 o 
   8  -4   1        0.04       -0.55      0.89 o 
   9  -4   1        2.20        0.52      1.04 o 
  10  -4   1        4.57        2.82      2.23 o 
  11  -4   1        4.45        6.17      2.71 o 
 -10  -3   1        0.00       -0.04      1.40 o 
  -9  -3   1        0.12        2.88      1.21 o 
  -8  -3   1       18.76       17.93      1.54 o 
  -7  -3   1      124.61      122.62      3.17 o 
  -6  -3   1       27.25       24.05      0.91 o 
  -5  -3   1       63.32       60.52      1.24 o 
  -4  -3   1       11.65       12.60      0.55 o 
  -3  -3   1       86.74       93.58      1.36 o 
  -2  -3   1      963.70     1097.24     12.23 o 
  -1  -3   1     1204.35     1238.29     14.51 o 
   0  -3   1        2.26        7.28      0.36 o 
   1  -3   1      312.54      317.72      3.92 o 
   2  -3   1        3.87        4.27      0.92 o 
   3  -3   1      666.25      678.92      7.76 o 
   4  -3   1     1077.86     1072.52     12.10 o 
   5  -3   1       77.94       72.49      1.30 o 
   6  -3   1      262.68      271.20      3.80 o 
   7  -3   1       52.45       49.42      1.45 o 
   8  -3   1        2.74       -0.03      0.72 o 
   9  -3   1        1.29        1.40      1.06 o 
  10  -3   1        0.41        0.96      1.43 o 
  11  -3   1       11.40       10.92      2.83 o 
 -10  -2   1       29.87       41.34      2.85 o 
  -9  -2   1       71.22       55.49      2.40 o 
  -8  -2   1      919.45      894.34     14.64 o 
  -7  -2   1      629.08      590.92      7.33 o 
  -6  -2   1      112.41      123.16      2.08 o 
  -5  -2   1      387.24      361.07      4.53 o 
  -4  -2   1      181.34      166.10      2.44 o 
  -3  -2   1     1231.66     1184.89     12.56 o 
  -2  -2   1      422.85      393.70      4.57 o 
  -1  -2   1      106.19      106.09      1.30 o 
   0  -2   1      314.47      359.71      3.70 o 
   1  -2   1     3077.38     2920.85     28.85 o 
   2  -2   1     1223.13     1232.75     18.80 o 
   3  -2   1      647.50      578.41      5.98 o 
   4  -2   1      301.36      330.52      4.07 o 
   5  -2   1      265.03      267.24      3.70 o 
   6  -2   1      186.23      171.59      2.59 o 
   7  -2   1      107.01      119.98      2.39 o 
   8  -2   1       40.31       42.04      1.55 o 
   9  -2   1       17.79       22.80      1.55 o 
  10  -2   1        1.52       -0.75      2.33 o 
  11  -2   1        8.78        4.57      1.80 o 
 -11  -1   1        5.84       10.17      2.65 o 
 -10  -1   1        3.07        2.43      2.25 o 
  -9  -1   1       65.80       75.00      2.75 o 
  -8  -1   1        7.27       13.00      1.43 o 
  -7  -1   1       18.24       15.97      0.89 o 
  -6  -1   1       29.63       27.46      0.93 o 
  -5  -1   1       22.50       18.14      0.74 o 
  -4  -1   1       91.08       85.19      1.64 o 
  -3  -1   1      440.56      389.57      5.45 o 
  -2  -1   1      207.28      234.65      8.38 o 
  -1  -1   1      881.87      781.60      7.86 o 
   0  -1   1     1146.40     1300.52     13.00 o 
   1  -1   1     2702.32     2582.00     26.83 o 
   2  -1   1      185.00      192.55      2.03 o 
   3  -1   1      236.08      229.17      2.27 o 
   4  -1   1      611.21      563.14      5.92 o 
   5  -1   1      952.10      907.19      9.38 o 
   6  -1   1       24.13       23.03      0.95 o 
   7  -1   1        6.39        7.07      0.78 o 
   8  -1   1      400.46      391.66      5.93 o 
   9  -1   1        1.28        0.69      1.01 o 
  10  -1   1        0.00       -2.26      1.51 o 
  11  -1   1       28.24       33.22      2.72 o 
 -11   0   1        0.41       -0.19      2.05 o 
 -10   0   1        5.37        4.05      1.83 o 
  -9   0   1       40.48       44.50      2.08 o 
  -8   0   1       36.98       33.18      1.41 o 
  -7   0   1       43.07       40.66      1.40 o 
  -6   0   1      176.18      186.73      2.74 o 
  -5   0   1       37.49       50.71      1.16 o 
  -4   0   1        1.27        5.59      0.39 o 
  -3   0   1      208.09      195.32      2.15 o 
  -2   0   1      306.44      352.41      6.09 o 
  -1   0   1       44.96       44.12      0.53 o 
   0   0   1     1516.83      848.09     29.11 o 
   1   0   1       60.99       58.85      1.23 o 
   2   0   1     5949.62     5868.05     53.44 o 
   3   0   1      156.51      136.32      1.50 o 
   4   0   1      813.00      763.70      7.25 o 
   5   0   1      117.73      107.52      1.72 o 
   6   0   1        8.83        3.94      0.52 o 
   7   0   1       20.09       19.34      0.91 o 
   8   0   1       46.16       46.11      1.74 o 
   9   0   1      159.94      164.08      3.95 o 
  10   0   1        8.08        2.70      1.94 o 
  11   0   1       38.47       48.14      3.13 o 
 -11   1   1        3.78        9.04      3.07 o 
 -10   1   1       30.17       35.75      2.74 o 
  -9   1   1       10.94       14.22      1.87 o 
  -8   1   1       60.29       65.84      1.89 o 
  -7   1   1      189.61      189.27      3.30 o 
  -6   1   1       20.79       27.04      1.06 o 
  -5   1   1      237.43      217.34      2.96 o 
  -4   1   1     1524.79     1538.72     16.23 o 
  -3   1   1        0.10        0.30      0.20 o 
  -2   1   1      185.35      188.41      2.19 o 
  -1   1   1        5.99       10.29      0.21 o 
   0   1   1       96.81       65.13      2.54 o 
   1   1   1     1242.69     1256.69     13.00 o 
   2   1   1     2506.63     2456.05     21.61 o 
   3   1   1      363.15      393.37      3.97 o 
   4   1   1      136.81      123.89      1.68 o 
   5   1   1        1.50        0.60      0.44 o 
   6   1   1        1.37       -0.02      0.40 o 
   7   1   1       33.27       30.32      1.04 o 
   8   1   1      610.37      608.71      8.61 o 
   9   1   1       91.74       84.12      3.13 o 
  10   1   1      204.68      219.32      5.05 o 
  11   1   1       29.35       26.65      3.26 o 
 -11   2   1        1.18        1.33      2.01 o 
 -10   2   1        7.05       11.24      1.95 o 
  -9   2   1       30.57       39.92      2.24 o 
  -8   2   1      203.28      212.93      3.76 o 
  -7   2   1      309.35      302.89      4.70 o 
  -6   2   1      680.32      699.94      8.33 o 
  -5   2   1      622.64      738.75      9.79 o 
  -4   2   1       70.28       57.34      1.21 o 
  -3   2   1      949.95      894.64     10.02 o 
  -2   2   1     2410.40     2255.28     21.42 o 
  -1   2   1     4795.76     4751.00     47.52 o 
   1   2   1     3898.44     3968.83     47.86 o 
   2   2   1      561.58      543.46      4.92 o 
   3   2   1      858.71      788.81      8.45 o 
   4   2   1      326.58      313.17      3.48 o 
   5   2   1       40.63       41.64      1.09 o 
   6   2   1        7.56        8.72      0.57 o 
   7   2   1        5.65        7.16      0.63 o 
   8   2   1       54.20       45.07      3.39 o 
   9   2   1      510.68      533.80      9.44 o 
  10   2   1        1.72        1.98      1.24 o 
  11   2   1       47.71       43.57      5.29 o 
 -11   3   1        2.42        3.08      1.72 o 
 -10   3   1        0.18       -1.56      1.42 o 
  -9   3   1       45.56       48.60      2.10 o 
  -8   3   1        7.74        7.50      1.08 o 
  -7   3   1        0.86        0.62      0.54 o 
  -6   3   1       11.19       12.36      0.72 o 
  -5   3   1      410.43      398.49      4.96 o 
  -4   3   1       55.23       66.97      1.31 o 
  -3   3   1        0.11        0.66      0.24 o 
  -2   3   1       66.62       55.37      0.99 o 
  -1   3   1     1474.40     1473.51     18.61 o 
   0   3   1     9751.38    10457.67    350.14 o 
   1   3   1     5858.12     5660.06     94.45 o 
   2   3   1      816.83      884.14     16.06 o 
   3   3   1      850.91      990.56     11.13 o 
   4   3   1     2120.11     2162.33     25.39 o 
   5   3   1        3.27        0.65      0.49 o 
   6   3   1      349.23      350.74      4.52 o 
   7   3   1       62.54       55.43      1.41 o 
   8   3   1       14.30       15.15      1.38 o 
   9   3   1        1.81       -0.36      1.21 o 
  10   3   1        8.06        4.00      2.12 o 
  11   3   1        0.86        2.33      2.04 o 
 -11   4   1       49.64       57.85      4.49 o 
 -10   4   1        6.38        3.10      1.67 o 
  -9   4   1       75.96       78.64      2.66 o 
  -8   4   1       66.99       70.45      2.34 o 
  -7   4   1      255.87      264.42      3.75 o 
  -6   4   1      493.08      532.59      6.88 o 
  -5   4   1        3.83        3.98      0.49 o 
  -4   4   1        1.09       -0.56      0.38 o 
  -3   4   1        0.16       -0.39      0.27 o 
  -2   4   1       35.39       29.47      1.91 o 
  -1   4   1      534.03      506.93      7.07 o 
   0   4   1      760.08      888.63     21.24 o 
   1   4   1      661.59      673.58     11.53 o 
   2   4   1      317.81      303.09      3.80 o 
   3   4   1     2948.59     3079.59     33.88 o 
   4   4   1      741.54      937.12     10.68 o 
   5   4   1      172.66      188.34      3.00 o 
   6   4   1      176.46      163.39      2.65 o 
   7   4   1        0.02       -0.18      0.63 o 
   8   4   1      139.69      148.50      3.59 o 
   9   4   1       31.93       41.96      2.87 o 
  10   4   1       26.09       36.28      2.53 o 
 -10   5   1        4.56        6.13      2.39 o 
  -9   5   1       75.09       90.19      3.73 o 
  -8   5   1      195.24      195.38      4.24 o 
  -7   5   1        1.49        1.27      0.88 o 
  -6   5   1      117.62      125.18      2.13 o 
  -5   5   1      195.46      197.20      2.96 o 
  -4   5   1      303.21      264.96      3.89 o 
  -3   5   1      900.98      864.13     11.11 o 
  -2   5   1      586.54      607.79      7.33 o 
  -1   5   1      341.20      301.43      4.34 o 
   0   5   1      680.66      697.27     11.85 o 
   1   5   1     1547.37     1504.88     22.60 o 
   2   5   1      537.57      531.38      6.48 o 
   3   5   1      521.62      548.79      6.36 o 
   4   5   1        7.17        5.89      0.48 o 
   5   5   1       87.24       75.10      1.52 o 
   6   5   1       18.11       20.94      1.03 o 
   7   5   1       33.58       31.74      1.30 o 
   8   5   1      161.49      149.38      4.06 o 
   9   5   1       66.10       69.23      4.34 o 
  10   5   1       28.30       29.52      2.47 o 
 -10   6   1        7.95        8.55      2.63 o 
  -9   6   1       63.09       79.37      3.60 o 
  -8   6   1        3.08        3.31      1.10 o 
  -7   6   1        8.68       11.12      1.12 o 
  -6   6   1      177.76      182.31      3.15 o 
  -5   6   1       87.74       94.15      1.77 o 
  -4   6   1       16.94       19.41      0.87 o 
  -3   6   1       45.84       43.26      1.10 o 
  -2   6   1      659.26      672.96     10.63 o 
  -1   6   1      220.69      203.36      2.61 o 
   0   6   1      506.64      522.89      9.01 o 
   1   6   1      411.44      426.07      6.72 o 
   2   6   1      476.86      428.20      6.18 o 
   3   6   1       90.88       87.51      1.70 o 
   4   6   1       85.74       84.67      1.61 o 
   5   6   1        1.21       -0.24      0.45 o 
   6   6   1        1.30        0.46      0.58 o 
   7   6   1        1.38        4.56      0.97 o 
   8   6   1        9.24       12.00      1.45 o 
   9   6   1        4.96        5.87      1.60 o 
  -9   7   1        1.34        0.75      1.94 o 
  -8   7   1      216.29      224.21      6.30 o 
  -7   7   1      183.16      163.09      5.04 o 
  -6   7   1       10.79        6.23      1.04 o 
  -5   7   1        0.99        0.14      0.56 o 
  -4   7   1       50.06       40.40      1.22 o 
  -3   7   1       26.26       25.92      0.90 o 
  -2   7   1       12.40      100.74      4.44 o 
  -1   7   1        3.00        4.49      0.45 o 
   0   7   1      257.00      304.66      7.75 o 
   1   7   1       39.01       43.85      1.76 o 
   2   7   1       30.63       56.86      3.34 o 
   3   7   1       15.12       17.71      0.62 o 
   4   7   1       50.19       55.82      2.44 o 
   5   7   1       67.61       61.85      1.49 o 
   6   7   1       17.21        9.70      0.90 o 
   7   7   1       42.80       48.94      3.51 o 
   8   7   1        9.46       16.02      1.74 o 
   9   7   1       10.86       13.58      1.79 o 
  -9   8   1        6.29        5.20      1.78 o 
  -8   8   1       10.68        6.95      1.91 o 
  -7   8   1        3.85        5.79      1.64 o 
  -6   8   1      327.87      330.49      7.94 o 
  -5   8   1       13.39       11.54      1.22 o 
  -4   8   1        0.24       -0.84      0.56 o 
  -3   8   1        5.61        4.30      0.60 o 
  -2   8   1       22.94       26.49      0.85 o 
  -1   8   1        9.81       10.98      0.73 o 
   0   8   1      760.90      808.40     13.58 o 
   1   8   1       23.86       26.01      2.02 o 
   2   8   1        3.05        3.14      0.55 o 
   3   8   1        0.26       -0.72      0.48 o 
   4   8   1        2.81        1.71      0.45 o 
   5   8   1        9.01        7.40      0.69 o 
   6   8   1      152.10      129.46      2.77 o 
   7   8   1        2.85       -0.62      1.55 o 
   8   8   1        2.58        1.71      1.29 o 
  -8   9   1        5.63        6.39      1.73 o 
  -7   9   1       86.87       91.94      3.90 o 
  -6   9   1        9.98        3.76      1.50 o 
  -5   9   1        0.32       -0.71      0.76 o 
  -4   9   1      105.11      126.51      3.56 o 
  -3   9   1       40.75       41.18      1.37 o 
  -2   9   1       19.21      100.29      3.44 o 
  -1   9   1      171.49      164.18      3.37 o 
   0   9   1      407.28      449.12      7.91 o 
   1   9   1      587.79      564.92     11.31 o 
   2   9   1      104.46       96.61      2.14 o 
   3   9   1        0.80       -0.84      0.56 o 
   4   9   1        0.23       -0.45      0.53 o 
   5   9   1        0.02       -0.73      0.60 o 
   6   9   1       12.75       11.90      1.29 o 
   7   9   1        2.14        4.27      1.26 o 
  -7  10   1        0.06       -1.98      1.33 o 
  -6  10   1       17.01       14.12      2.32 o 
  -5  10   1        0.03       -1.55      1.03 o 
  -4  10   1        1.28        0.86      0.76 o 
  -3  10   1        3.47        3.69      0.74 o 
  -2  10   1       89.92       94.26      3.05 o 
  -1  10   1        7.25        7.54      0.87 o 
   0  10   1      117.04      127.57      4.05 o 
   1  10   1      157.53      139.89      3.06 o 
   2  10   1      116.69      113.86      3.13 o 
   3  10   1        0.15       -0.81      0.61 o 
   4  10   1       19.04       15.34      0.97 o 
   5  10   1        2.47        3.79      1.04 o 
   6  10   1        0.29        0.76      1.33 o 
  -5  11   1        0.01       -1.63      1.09 o 
  -4  11   1        3.39        1.88      1.07 o 
  -3  11   1        1.63       -1.12      0.90 o 
  -2  11   1       14.83       12.26      1.08 o 
  -1  11   1        1.32       -0.23      0.75 o 
   0  11   1       21.36       25.73      1.30 o 
   1  11   1       32.56       31.21      1.65 o 
   2  11   1        5.04        3.25      1.02 o 
   3  11   1        3.06        2.24      0.81 o 
   4  11   1        2.30        1.97      0.71 o 
  -3  12   1        1.25        0.54      1.10 o 
  -2  12   1        6.16        7.94      1.03 o 
  -1  12   1        4.88        6.45      0.95 o 
   0  12   1        5.89        6.69      0.92 o 
   1  12   1        5.22        4.44      1.11 o 
   2  12   1       20.78       21.87      1.28 o 
   0 -11   2        1.65        1.18      1.13 o 
   1 -11   2        0.14        0.53      1.10 o 
   2 -11   2        0.46        2.29      1.19 o 
   3 -11   2        4.71        4.12      1.35 o 
  -3 -10   2        0.33       -0.29      1.06 o 
  -2 -10   2       11.83        9.89      1.33 o 
  -1 -10   2        3.54        0.21      1.07 o 
   0 -10   2       60.55       66.54      2.24 o 
   1 -10   2        2.89       -0.35      2.03 o 
   2 -10   2       10.39       14.75      1.57 o 
   3 -10   2        2.78        6.07      1.36 o 
   4 -10   2        5.10        5.11      1.32 o 
   5 -10   2        3.00        2.85      1.39 o 
   6 -10   2        0.04       -0.94      1.68 o 
  -5  -9   2        4.11        1.59      0.98 o 
  -4  -9   2        3.38        3.33      0.99 o 
  -3  -9   2        2.74        3.43      1.05 o 
  -2  -9   2        4.86        6.40      0.90 o 
  -1  -9   2        0.62        0.24      0.70 o 
   0  -9   2       15.00       16.73      0.99 o 
   1  -9   2        7.10        8.03      1.00 o 
   2  -9   2       26.17       24.46      1.36 o 
   3  -9   2        0.01        1.51      0.99 o 
   4  -9   2       11.32       13.43      1.54 o 
   5  -9   2        0.70        1.47      1.22 o 
   6  -9   2        3.21        4.47      1.48 o 
   7  -9   2        4.50        2.44      1.55 o 
  -6  -8   2        3.70        2.61      1.31 o 
  -5  -8   2       27.92       32.25      2.18 o 
  -4  -8   2       46.35       41.47      1.79 o 
  -3  -8   2        0.34       -0.07      0.60 o 
  -2  -8   2       15.09       16.54      1.00 o 
  -1  -8   2        0.09        0.08      0.55 o 
   0  -8   2       27.57       28.69      1.06 o 
   1  -8   2        0.28       -0.54      0.54 o 
   2  -8   2        0.03        3.03      0.72 o 
   3  -8   2       20.49       24.08      1.72 o 
   4  -8   2       25.86       29.91      1.45 o 
   5  -8   2        7.23        9.68      1.49 o 
   6  -8   2        5.56        3.58      1.44 o 
   7  -8   2        3.89        2.11      1.49 o 
   8  -8   2       34.11       38.19      2.73 o 
  -7  -7   2        0.04       -0.41      1.22 o 
  -6  -7   2       21.88       17.24      1.57 o 
  -5  -7   2        0.83       -1.29      0.86 o 
  -4  -7   2       34.50       30.71      1.36 o 
  -3  -7   2       37.72       32.70      1.10 o 
  -2  -7   2        0.20        4.71      0.67 o 
  -1  -7   2      230.36      222.13      3.24 o 
   0  -7   2        7.84       10.87      0.67 o 
   1  -7   2       79.30       73.69      1.48 o 
   2  -7   2        5.17        3.73      0.61 o 
   3  -7   2        1.64       -0.03      0.58 o 
   4  -7   2       56.58       62.18      1.77 o 
   5  -7   2       52.06       51.58      2.17 o 
   6  -7   2       17.63       16.52      1.79 o 
   7  -7   2        4.52        4.88      1.46 o 
   8  -7   2        0.16       -1.06      1.36 o 
   9  -7   2        0.29       -2.26      1.50 o 
  -8  -6   2        0.00       -0.54      1.60 o 
  -7  -6   2        0.01        0.48      1.61 o 
  -6  -6   2        6.98       10.17      1.31 o 
  -5  -6   2        7.41        5.11      0.89 o 
  -4  -6   2       22.40       20.49      0.92 o 
  -3  -6   2       36.17       35.15      1.10 o 
  -2  -6   2       30.75       50.07      1.10 o 
  -1  -6   2      203.38      193.15      2.83 o 
   0  -6   2       34.57       36.80      0.99 o 
   1  -6   2       72.74       79.27      1.47 o 
   2  -6   2       23.21       24.47      0.93 o 
   3  -6   2      189.77      191.74      3.35 o 
   4  -6   2        1.77        0.80      0.71 o 
   5  -6   2      233.34      224.68      3.73 o 
   6  -6   2       18.26       16.61      1.43 o 
   7  -6   2       27.61       27.11      1.80 o 
   8  -6   2       20.22       21.95      1.81 o 
   9  -6   2        2.25        2.06      1.54 o 
  10  -6   2        0.17        0.07      3.29 o 
  -9  -5   2        4.36        4.19      1.65 o 
  -8  -5   2        1.26        1.10      1.36 o 
  -7  -5   2       20.69       19.24      1.77 o 
  -6  -5   2       14.78       22.03      1.70 o 
  -5  -5   2        2.00        2.53      0.65 o 
  -4  -5   2       59.29       59.59      1.44 o 
  -3  -5   2       15.92       16.17      0.80 o 
  -2  -5   2      112.62       93.56      1.68 o 
  -1  -5   2        0.17        0.13      0.37 o 
   0  -5   2       22.63       25.51      0.80 o 
   1  -5   2       43.50       39.53      1.72 o 
   2  -5   2      321.33      280.83      4.36 o 
   3  -5   2      137.93      127.19      2.24 o 
   4  -5   2       18.04       14.03      0.93 o 
   5  -5   2      161.95      157.02      2.61 o 
   6  -5   2      109.91      107.21      2.27 o 
   7  -5   2       44.77       50.12      2.26 o 
   8  -5   2        7.93        4.60      1.34 o 
   9  -5   2        1.08        2.54      1.34 o 
  10  -5   2        0.21       -1.93      1.90 o 
  -9  -4   2        8.38        7.92      1.67 o 
  -8  -4   2        7.32        9.31      2.22 o 
  -7  -4   2        6.29       10.08      1.24 o 
  -6  -4   2       49.05       53.28      1.82 o 
  -5  -4   2        0.97        0.14      0.54 o 
  -4  -4   2       40.91       46.58      1.23 o 
  -3  -4   2      330.97      332.75      4.46 o 
  -2  -4   2       89.11       90.05      2.00 o 
  -1  -4   2      117.10      128.46      2.09 o 
   0  -4   2        8.59        5.65      0.44 o 
   1  -4   2       37.92       49.29      1.23 o 
   2  -4   2        0.58      208.35      8.33 o 
   3  -4   2      143.77      137.28      1.99 o 
   4  -4   2      451.06      440.09      5.46 o 
   5  -4   2      374.91      354.07      4.80 o 
   6  -4   2       22.39       21.84      0.97 o 
   7  -4   2       68.14       62.37      1.94 o 
   8  -4   2       13.27        8.34      1.41 o 
   9  -4   2       85.59       86.15      2.71 o 
  10  -4   2        5.34        7.10      2.43 o 
  11  -4   2        0.01       -3.04      2.25 o 
 -10  -3   2        6.84       13.91      2.52 o 
  -9  -3   2        0.10        0.15      1.27 o 
  -8  -3   2        2.45        1.11      1.09 o 
  -7  -3   2       61.34       61.16      2.45 o 
  -6  -3   2      523.57      505.86      7.61 o 
  -5  -3   2        0.67        0.64      0.43 o 
  -4  -3   2        0.08        2.12      0.52 o 
  -3  -3   2      547.64      573.36      6.72 o 
  -2  -3   2        9.86        8.18      0.66 o 
  -1  -3   2      735.14      713.51      7.66 o 
   0  -3   2       27.49       25.07      0.63 o 
   1  -3   2      246.56      259.35      3.16 o 
   2  -3   2      321.29      441.04      7.29 o 
   3  -3   2       82.47       78.81      1.27 o 
   4  -3   2        1.86        0.20      0.30 o 
   5  -3   2       13.32       15.83      0.75 o 
   6  -3   2      221.46      270.34      3.67 o 
   7  -3   2        0.23       -0.70      0.47 o 
   8  -3   2       74.99       69.68      2.29 o 
   9  -3   2       41.78       40.07      1.89 o 
  10  -3   2       22.31       22.13      2.20 o 
  11  -3   2        8.19        7.59      2.60 o 
 -10  -2   2        0.01       -2.15      2.65 o 
  -9  -2   2       18.14       18.49      1.74 o 
  -8  -2   2       87.36      103.37      3.05 o 
  -7  -2   2      472.09      445.00      7.99 o 
  -6  -2   2      307.77      303.67      4.87 o 
  -5  -2   2      432.49      431.04      5.68 o 
  -4  -2   2      734.01      747.08     12.23 o 
  -3  -2   2       93.22       88.28      1.51 o 
  -2  -2   2       44.87      608.42     20.41 o 
  -1  -2   2       61.79       41.51      0.78 o 
   0  -2   2     4159.09     4494.78     44.14 o 
   1  -2   2      276.84      279.62      3.15 o 
   2  -2   2      192.02      186.47      6.74 o 
   3  -2   2       19.44       14.21      0.48 o 
   4  -2   2        0.19        0.47      0.29 o 
   5  -2   2      348.13      311.29      3.96 o 
   6  -2   2       20.74       12.96      0.71 o 
   7  -2   2        2.59        2.07      0.64 o 
   8  -2   2       41.15       40.08      1.50 o 
   9  -2   2       15.12       23.52      2.09 o 
  10  -2   2        4.04        0.34      1.55 o 
  11  -2   2        8.15        9.56      1.99 o 
 -10  -1   2       20.38       27.97      7.57 o 
  -9  -1   2       55.11       56.81      2.39 o 
  -8  -1   2        4.96        4.96      1.20 o 
  -7  -1   2       97.30      102.93      2.39 o 
  -6  -1   2       12.27        9.85      0.85 o 
  -5  -1   2       31.67       33.32      1.20 o 
  -4  -1   2       97.22      111.94      2.70 o 
  -3  -1   2      452.49      442.61      5.28 o 
  -2  -1   2      158.75      201.62      2.88 o 
  -1  -1   2      204.85      210.94      2.34 o 
   0  -1   2      743.10      858.50      9.08 o 
   1  -1   2    11895.44    11599.56    120.05 o 
   2  -1   2    25043.41    24024.31    237.05 o 
   3  -1   2       28.72       25.26      0.57 o 
   4  -1   2      900.74      846.78      8.35 o 
   5  -1   2       51.12       31.79      0.77 o 
   6  -1   2       67.52       62.77      1.39 o 
   7  -1   2      134.22      139.22      2.62 o 
   8  -1   2        6.22        3.79      0.90 o 
   9  -1   2        3.63        6.32      1.15 o 
  10  -1   2       22.63       22.51      2.38 o 
  11  -1   2        5.31       10.29      2.87 o 
 -10   0   2        1.54        2.20      2.76 o 
  -9   0   2        0.99        1.90      1.28 o 
  -8   0   2        7.37        5.17      1.16 o 
  -7   0   2       19.25       15.25      1.02 o 
  -6   0   2       45.22       45.10      1.28 o 
  -5   0   2      117.95      111.13      2.49 o 
  -4   0   2     1063.85     1092.80     11.71 o 
  -3   0   2      351.79      308.72      3.41 o 
  -2   0   2     1046.83     1046.62      9.37 o 
  -1   0   2      568.39      593.45      5.79 o 
   0   0   2     2718.71     3130.47     29.63 o 
   1   0   2     3889.84     3673.11     34.69 o 
   2   0   2    19468.83    18761.04    185.29 o 
   3   0   2     6780.02     6853.87     59.89 o 
   4   0   2       71.96       79.70      1.09 o 
   5   0   2      296.90      293.52      3.55 o 
   6   0   2      254.92      269.54      3.41 o 
   7   0   2        7.92        5.92      0.59 o 
   8   0   2        8.11        9.18      0.93 o 
   9   0   2      111.18      114.93      3.19 o 
  10   0   2       84.09       85.52      3.40 o 
  11   0   2        2.44        6.66      1.87 o 
 -11   1   2        6.38       11.87      2.73 o 
 -10   1   2        0.62        1.38      1.46 o 
  -9   1   2       28.23       25.12      2.22 o 
  -8   1   2        0.88        0.24      0.72 o 
  -7   1   2       47.00       45.93      1.52 o 
  -6   1   2       74.02       70.87      1.82 o 
  -5   1   2       10.09       22.51      0.87 o 
  -4   1   2     2847.00     3008.07     31.30 o 
  -3   1   2      316.26      296.62      3.14 o 
  -2   1   2     3741.34     3661.54     34.71 o 
  -1   1   2       93.94       79.95      0.94 o 
   0   1   2      329.92      410.84      4.02 o 
   1   1   2        8.40        7.06      0.21 o 
   2   1   2      945.95     1011.22      9.32 o 
   3   1   2     3482.74     3396.97     32.17 o 
   4   1   2     1113.06     1065.01     11.38 o 
   5   1   2      271.79      303.14      3.48 o 
   6   1   2        3.39        1.34      0.42 o 
   7   1   2        0.38       -0.67      0.44 o 
   8   1   2       70.22       62.41      1.84 o 
   9   1   2       23.52       27.87      1.78 o 
  10   1   2        0.73       -1.85      1.23 o 
  11   1   2        5.36       12.96      3.67 o 
 -11   2   2       20.97       31.16      3.58 o 
 -10   2   2        2.20        1.88      1.54 o 
  -9   2   2        4.23        3.51      2.00 o 
  -8   2   2       30.36       25.29      1.27 o 
  -7   2   2        8.11        7.38      1.15 o 
  -6   2   2       65.80       69.72      1.58 o 
  -5   2   2     1562.18     1499.83     19.17 o 
  -4   2   2       66.80      105.02      1.82 o 
  -3   2   2      185.92      211.97      2.86 o 
  -2   2   2      137.77      162.09      6.00 o 
  -1   2   2     3297.51     3271.66     30.98 o 
   0   2   2      595.13      618.47      7.05 o 
   1   2   2     1923.79     1814.04     21.54 o 
   2   2   2       93.45       77.69      1.62 o 
   3   2   2      963.85      887.71      9.45 o 
   4   2   2      242.48      252.98      2.88 o 
   5   2   2      343.86      315.08      3.58 o 
   6   2   2      149.38      145.56      2.12 o 
   7   2   2        2.17        1.03      0.51 o 
   8   2   2       12.76       15.38      1.36 o 
   9   2   2      206.63      194.03      4.48 o 
  10   2   2       11.83       19.84      1.66 o 
  11   2   2        3.40        7.86      2.48 o 
 -11   3   2       11.85       16.45      2.97 o 
 -10   3   2        3.56        1.85      1.60 o 
  -9   3   2       38.33       45.62      2.11 o 
  -8   3   2       42.63       38.00      1.79 o 
  -7   3   2        5.08        4.53      0.65 o 
  -6   3   2        0.16       -0.50      0.49 o 
  -5   3   2      159.14      155.98      2.34 o 
  -4   3   2      655.37      663.57      8.16 o 
  -3   3   2       54.84       43.95      0.87 o 
  -2   3   2       33.58       37.72      2.07 o 
  -1   3   2      493.30      480.15      5.75 o 
   0   3   2     1238.88     1498.49     55.19 o 
   1   3   2     1033.53     1035.12     24.82 o 
   2   3   2      581.76      616.72      7.43 o 
   3   3   2      155.68      139.04      1.74 o 
   4   3   2      255.97      237.86      3.05 o 
   5   3   2      137.41      129.00      1.88 o 
   6   3   2      105.19      122.64      1.92 o 
   7   3   2       66.17       66.27      1.51 o 
   8   3   2      121.79      127.75      3.25 o 
   9   3   2       11.09        9.09      1.28 o 
  10   3   2        0.90        0.36      1.38 o 
  11   3   2        0.52        1.40      1.56 o 
 -10   4   2        6.41        5.90      1.76 o 
  -9   4   2       28.92       37.00      1.94 o 
  -8   4   2       33.43       37.19      1.76 o 
  -7   4   2       14.28       17.43      0.95 o 
  -6   4   2        7.42        7.61      0.70 o 
  -5   4   2        4.48        3.46      0.60 o 
  -4   4   2     1257.41     1212.72     13.65 o 
  -3   4   2      862.61      849.28     10.91 o 
  -2   4   2      231.89      253.11      3.45 o 
  -1   4   2      125.44      110.14      1.88 o 
   1   4   2       64.35       79.31      3.74 o 
   2   4   2      165.25      207.09      3.11 o 
   3   4   2      309.66      387.09      4.54 o 
   4   4   2      681.72      746.53      8.58 o 
   5   4   2       24.14       29.07      0.97 o 
   6   4   2       36.32       42.06      1.14 o 
   7   4   2      154.74      152.64      2.66 o 
   8   4   2      169.38      170.67      3.87 o 
   9   4   2        1.53        4.20      1.23 o 
  10   4   2        4.59        6.09      1.63 o 
  11   4   2        0.27        1.98      1.61 o 
 -10   5   2        0.43       -0.90      2.89 o 
  -9   5   2        0.44        3.73      1.27 o 
  -8   5   2       42.73       44.69      1.95 o 
  -7   5   2      210.61      211.02      4.31 o 
  -6   5   2      253.53      251.83      3.77 o 
  -5   5   2        4.79        5.69      0.63 o 
  -4   5   2        6.04        5.53      0.55 o 
  -3   5   2       56.58       60.67      1.26 o 
  -2   5   2      190.31      270.85      3.68 o 
  -1   5   2     5386.05     5596.56    107.01 o 
   0   5   2       92.85      104.63      4.52 o 
   1   5   2        2.73        1.67      1.15 o 
   2   5   2       80.35      131.37      9.33 o 
   3   5   2      218.70      186.16      2.36 o 
   4   5   2      298.95      294.28      3.67 o 
   5   5   2        2.13        3.08      0.47 o 
   6   5   2       14.43       18.56      0.84 o 
   7   5   2        6.03        3.02      0.76 o 
   8   5   2       26.85       24.33      1.72 o 
   9   5   2       45.17       42.06      2.49 o 
  10   5   2       19.53       16.11      2.01 o 
 -10   6   2        0.00       -2.22      2.48 o 
  -9   6   2        1.34        3.17      1.45 o 
  -8   6   2       50.62       62.69      2.31 o 
  -7   6   2       14.11       12.79      1.22 o 
  -6   6   2       87.13       95.61      2.34 o 
  -5   6   2        8.76        6.17      0.81 o 
  -4   6   2        3.19        2.10      0.68 o 
  -3   6   2      342.48      371.78      5.09 o 
  -2   6   2      536.71      599.69      7.73 o 
  -1   6   2      143.65      171.32      3.22 o 
   0   6   2     1409.71     1532.26     51.83 o 
   1   6   2      865.64      795.68     27.75 o 
   2   6   2      839.09      866.91     14.92 o 
   3   6   2       48.48       41.31      1.13 o 
   4   6   2      103.77      106.56      1.62 o 
   5   6   2       40.88       48.91      1.12 o 
   6   6   2       25.36       25.01      1.01 o 
   7   6   2       34.97       35.61      1.46 o 
   8   6   2        3.04        4.85      1.23 o 
   9   6   2        8.20       10.62      1.63 o 
  10   6   2        0.07       -1.07      1.37 o 
  -9   7   2      117.63      127.33      4.64 o 
  -8   7   2      139.56      151.35      4.91 o 
  -7   7   2      466.50      522.56      9.94 o 
  -6   7   2      177.86      188.21      3.29 o 
  -5   7   2       10.54        7.67      0.80 o 
  -4   7   2       35.91       38.19      1.61 o 
  -3   7   2        6.38        5.01      0.56 o 
  -2   7   2       39.62       51.79      1.57 o 
  -1   7   2      117.62      109.56      2.66 o 
   0   7   2       58.58       65.98      3.59 o 
   1   7   2       55.21       58.19      3.54 o 
   2   7   2      540.39      527.34      9.37 o 
   3   7   2        1.97        1.23      0.40 o 
   4   7   2        0.13        0.56      0.45 o 
   5   7   2        3.68        1.90      0.48 o 
   6   7   2        7.90        4.50      0.68 o 
   7   7   2        1.46        4.55      0.95 o 
   8   7   2       87.86       86.18      4.32 o 
   9   7   2        2.93        4.66      1.50 o 
  -9   8   2       24.21       21.82      3.00 o 
  -8   8   2      283.33      313.80      8.06 o 
  -7   8   2       15.99       18.24      1.94 o 
  -6   8   2      186.06      185.16      5.25 o 
  -5   8   2        0.16       -1.15      0.77 o 
  -4   8   2      144.17      135.95      3.58 o 
  -3   8   2       21.90       21.56      0.83 o 
  -1   8   2        0.20       -0.62      0.54 o 
   0   8   2      324.28      350.37      8.81 o 
   1   8   2      190.20      185.05      5.40 o 
   2   8   2       37.63       30.75      1.50 o 
   3   8   2        3.40        3.93      0.51 o 
   4   8   2       14.19       17.34      0.88 o 
   5   8   2       17.87       20.91      0.88 o 
   6   8   2       29.30       23.44      1.01 o 
   7   8   2        4.78        6.90      1.17 o 
   8   8   2        2.45        0.97      1.22 o 
  -8   9   2        0.11        1.05      1.50 o 
  -7   9   2       13.01       11.88      1.85 o 
  -6   9   2       83.53       80.17      3.21 o 
  -5   9   2       20.75       15.12      1.64 o 
  -4   9   2        2.41       -0.30      0.67 o 
  -3   9   2        5.73        4.95      0.63 o 
  -1   9   2       43.00       40.60      1.13 o 
   0   9   2       97.24      110.57      3.52 o 
   1   9   2       48.38       54.12      2.22 o 
   2   9   2      675.84      620.34     22.23 o 
   3   9   2        1.00        0.59      0.58 o 
   4   9   2        3.57        2.70      0.63 o 
   5   9   2        0.09        0.52      0.82 o 
   6   9   2        0.26       -0.69      0.63 o 
   7   9   2        7.90       11.74      1.36 o 
  -7  10   2       20.30       21.56      2.03 o 
  -6  10   2       95.56      100.12      3.62 o 
  -5  10   2       24.16       20.41      1.48 o 
  -4  10   2        3.47        2.97      0.71 o 
  -3  10   2        2.21       -0.34      0.76 o 
  -2  10   2        7.76        6.03      0.85 o 
  -1  10   2        7.66        8.14      0.93 o 
   0  10   2      104.87      128.03      3.11 o 
   1  10   2       59.68       57.85      2.55 o 
   2  10   2       41.34       50.24      1.51 o 
   3  10   2        0.29       -0.57      0.57 o 
   4  10   2       30.32       27.40      1.21 o 
   5  10   2        4.61        2.74      0.91 o 
   6  10   2        0.75        2.68      1.24 o 
  -6  11   2       12.49       14.17      1.72 o 
  -5  11   2       65.40       74.01      2.82 o 
  -4  11   2        0.04       -1.10      1.01 o 
  -3  11   2       13.51       12.14      1.49 o 
  -2  11   2       42.55       47.74      1.87 o 
  -1  11   2        7.18        5.23      0.78 o 
   0  11   2       29.11       29.88      1.30 o 
   1  11   2       53.65       50.32      1.83 o 
   2  11   2        2.72        2.14      0.65 o 
   3  11   2        0.00        0.21      0.95 o 
   4  11   2        5.09        8.55      0.94 o 
   5  11   2        2.67        3.19      1.12 o 
  -4  12   2       15.55       16.08      1.92 o 
  -3  12   2        0.41       -1.03      0.80 o 
  -2  12   2        2.12        9.70      1.00 o 
  -1  12   2        0.08       -0.44      0.72 o 
   0  12   2       48.20       53.15      1.91 o 
   1  12   2        0.07       -0.88      0.62 o 
   2  12   2       44.16       43.53      1.78 o 
   3  12   2       15.31       15.33      1.10 o 
  -2 -10   3        7.24        3.67      1.32 o 
  -1 -10   3        2.64       -0.70      1.14 o 
   0 -10   3       50.59       65.11      2.89 o 
   1 -10   3        0.03       -0.23      1.20 o 
   2 -10   3        0.43       -0.33      1.27 o 
   3 -10   3       61.85       61.22      3.24 o 
   4 -10   3        3.44        4.69      1.51 o 
   5 -10   3       12.66       17.43      2.36 o 
  -4  -9   3        5.98        6.25      1.34 o 
  -3  -9   3        0.99        0.83      1.05 o 
  -2  -9   3        1.26       -1.31      0.87 o 
  -1  -9   3        1.40        1.41      1.01 o 
   0  -9   3       11.79       12.54      1.51 o 
   1  -9   3       15.37        9.78      1.46 o 
   2  -9   3       10.00        5.95      1.44 o 
   3  -9   3       24.24       19.47      4.19 o 
   4  -9   3      155.11      154.39      4.78 o 
   5  -9   3       10.94        9.01      1.66 o 
   6  -9   3       16.78       13.91      1.89 o 
   7  -9   3        3.83        3.41      1.99 o 
  -5  -8   3        5.50        3.62      1.08 o 
  -4  -8   3       26.75       41.03      2.11 o 
  -3  -8   3       34.90       28.80      1.74 o 
  -2  -8   3        0.09        0.66      0.86 o 
  -1  -8   3       73.95       74.66      2.21 o 
   0  -8   3        2.64        1.98      0.72 o 
   1  -8   3        9.44       11.78      0.91 o 
   2  -8   3        5.22        3.45      0.91 o 
   3  -8   3       17.53       14.37      1.42 o 
   4  -8   3       92.96       93.51      3.48 o 
   5  -8   3       38.12       44.26      2.53 o 
   6  -8   3       25.78       22.53      2.05 o 
   7  -8   3        0.18       -2.02      1.35 o 
   8  -8   3       17.22       21.75      2.36 o 
  -6  -7   3        3.06        4.32      1.43 o 
  -5  -7   3        0.14        0.21      0.84 o 
  -4  -7   3       13.08       15.77      1.31 o 
  -3  -7   3        1.48        1.93      0.89 o 
  -2  -7   3       39.80       37.91      1.34 o 
  -1  -7   3       94.58       96.70      2.21 o 
   0  -7   3        1.80        1.25      0.62 o 
   1  -7   3      142.84      127.47      2.22 o 
   2  -7   3       62.30       63.52      1.65 o 
   3  -7   3        8.66        5.57      0.82 o 
   4  -7   3      102.94      100.62      3.34 o 
   5  -7   3        0.40        0.16      1.25 o 
   6  -7   3       42.47       37.11      2.35 o 
   7  -7   3        3.98        4.70      1.52 o 
   8  -7   3        1.44        2.38      1.51 o 
   9  -7   3        3.93        2.84      1.73 o 
  -7  -6   3        6.22        2.32      1.46 o 
  -6  -6   3        0.35       -0.40      1.22 o 
  -5  -6   3        1.32        0.77      0.90 o 
  -4  -6   3        0.19        0.24      0.71 o 
  -3  -6   3       15.51       12.14      0.80 o 
  -2  -6   3        0.26        0.12      0.45 o 
  -1  -6   3       39.45       34.05      1.19 o 
   0  -6   3       50.85       40.48      1.22 o 
   1  -6   3      166.75      146.37      2.51 o 
   2  -6   3       93.96       98.09      1.90 o 
   3  -6   3       51.74       43.47      1.36 o 
   4  -6   3        4.85        4.21      0.72 o 
   5  -6   3       45.48       44.73      1.65 o 
   6  -6   3        3.07        4.01      1.14 o 
   7  -6   3      102.64       95.73      3.19 o 
   8  -6   3        1.63        1.33      1.36 o 
   9  -6   3       13.75       11.38      1.89 o 
  10  -6   3        3.55        2.37      3.67 o 
  -8  -5   3        0.69       -1.91      1.37 o 
  -7  -5   3       43.38       38.77      2.51 o 
  -6  -5   3        3.35        0.81      1.08 o 
  -5  -5   3       16.13       14.22      1.14 o 
  -4  -5   3       12.16       17.10      0.96 o 
  -3  -5   3      121.09      121.71      1.97 o 
  -2  -5   3       28.46       24.00      0.97 o 
  -1  -5   3      186.63      196.40      4.75 o 
   0  -5   3       82.60       96.16      2.02 o 
   1  -5   3      181.58      195.36      3.09 o 
   2  -5   3        0.44        5.83      1.22 o 
   3  -5   3       54.03       46.45      1.30 o 
   4  -5   3       35.38       40.39      1.34 o 
   5  -5   3       89.38       82.75      2.16 o 
   6  -5   3       13.97       11.94      1.12 o 
   7  -5   3        2.74        0.57      1.06 o 
   8  -5   3       86.40       85.57      3.10 o 
   9  -5   3        6.27       15.91      1.73 o 
  10  -5   3       10.05       13.46      2.71 o 
  -9  -4   3        0.05       -1.59      1.32 o 
  -8  -4   3        0.83       -0.55      1.34 o 
  -7  -4   3        0.00       -1.54      1.02 o 
  -6  -4   3       19.46       25.92      1.59 o 
  -5  -4   3        0.01       -0.85      0.57 o 
  -4  -4   3        4.77        3.94      0.72 o 
  -3  -4   3      153.64      138.50      2.19 o 
  -2  -4   3       16.33       22.83      1.49 o 
  -1  -4   3       89.65       72.83      1.43 o 
   0  -4   3      374.22      489.34      6.20 o 
   1  -4   3      236.34      244.77      3.16 o 
   2  -4   3       45.06       42.29      0.99 o 
   3  -4   3      428.57      415.24      5.09 o 
   4  -4   3       88.05       88.92      2.28 o 
   5  -4   3        3.30        4.35      0.50 o 
   6  -4   3       83.41       81.49      1.81 o 
   7  -4   3        0.01       -0.35      1.03 o 
   8  -4   3       10.59       13.59      1.54 o 
   9  -4   3        2.03        0.53      1.25 o 
  10  -4   3        1.79        2.25      2.22 o 
  11  -4   3        0.63       -1.81      2.20 o 
  -9  -3   3        6.93        6.27      1.70 o 
  -8  -3   3       10.53       10.08      1.50 o 
  -7  -3   3      191.42      152.70      3.76 o 
  -6  -3   3      590.28      528.92      9.15 o 
  -5  -3   3      155.37      145.57      2.68 o 
  -4  -3   3        1.98        1.90      0.77 o 
  -3  -3   3       47.01       49.05      1.08 o 
  -2  -3   3       15.94      208.75      4.82 o 
  -1  -3   3      376.84      330.79      4.06 o 
   0  -3   3        0.90       -0.43      0.29 o 
   1  -3   3      793.02      755.47      8.63 o 
   2  -3   3       75.51       73.67      1.35 o 
   3  -3   3       72.86       67.74      1.33 o 
   4  -3   3        5.14        2.13      0.37 o 
   5  -3   3      825.78      776.24      9.08 o 
   6  -3   3       30.46       33.14      1.04 o 
   7  -3   3        0.09       -0.40      0.54 o 
   8  -3   3       11.54        6.98      1.28 o 
   9  -3   3        2.93        2.67      1.23 o 
  10  -3   3       13.08       14.18      2.65 o 
  11  -3   3        0.02       -1.43      2.20 o 
 -10  -2   3        6.37        4.09      3.29 o 
  -9  -2   3        0.13       -0.89      1.41 o 
  -8  -2   3       38.74       40.43      2.00 o 
  -7  -2   3       11.70       10.71      1.37 o 
  -6  -2   3      486.46      447.41      7.57 o 
  -5  -2   3       52.72       45.24      1.33 o 
  -4  -2   3        1.37        3.35      0.87 o 
  -3  -2   3        0.81        0.91      0.37 o 
  -2  -2   3      287.13      258.19      3.28 o 
  -1  -2   3       18.62       28.78      0.77 o 
   0  -2   3        5.93        7.37      0.43 o 
   1  -2   3      551.62      540.06      6.62 o 
   2  -2   3     4914.10     4526.02     99.71 o 
   3  -2   3      117.08       93.28      1.61 o 
   4  -2   3      197.56      208.99      2.99 o 
   5  -2   3        9.66        9.34      0.60 o 
   6  -2   3        7.60        7.96      0.62 o 
   7  -2   3       76.44       61.95      1.64 o 
   8  -2   3       70.37       64.50      1.88 o 
   9  -2   3       32.36       76.85      4.45 o 
  10  -2   3       16.36       13.50      1.99 o 
  11  -2   3        0.21        2.86      1.94 o 
 -10  -1   3        4.57        4.94      2.29 o 
  -9  -1   3        0.97        2.34      2.00 o 
  -8  -1   3       16.43       16.66      1.53 o 
  -7  -1   3      133.72      154.10      4.51 o 
  -6  -1   3       20.30       19.52      1.79 o 
  -5  -1   3       61.60       49.99      1.45 o 
  -4  -1   3      179.21      163.46      2.75 o 
  -3  -1   3      172.75      170.29      2.57 o 
  -2  -1   3        7.42      127.12      3.81 o 
  -1  -1   3       50.18       47.46      0.84 o 
   0  -1   3      745.21      880.60      9.40 o 
   1  -1   3     2813.99     2674.80     27.84 o 
   2  -1   3      527.04      476.33      5.02 o 
   3  -1   3      367.75      326.99      3.61 o 
   4  -1   3     1491.90     1444.30     14.60 o 
   5  -1   3        0.22       -0.47      0.31 o 
   6  -1   3       29.08       27.21      1.03 o 
   7  -1   3       24.51       22.64      1.29 o 
   8  -1   3        5.91        5.19      0.93 o 
   9  -1   3        0.02        1.59      1.06 o 
  10  -1   3      198.49      216.13      6.47 o 
  11  -1   3       46.65       56.22      3.37 o 
 -10   0   3        0.59       -2.74      1.82 o 
  -9   0   3        8.51        4.27      1.67 o 
  -8   0   3       81.61       90.60      2.80 o 
  -7   0   3       17.37       22.34      1.97 o 
  -6   0   3      119.03      115.92      2.94 o 
  -5   0   3       13.41       12.71      0.70 o 
  -4   0   3      161.44      195.25      3.17 o 
  -3   0   3       24.24       29.67      0.72 o 
  -2   0   3     2562.55     2541.24     24.12 o 
  -1   0   3      177.61      188.71      1.99 o 
   0   0   3      669.19      746.34      7.27 o 
   1   0   3      419.21      430.42      4.30 o 
   2   0   3      105.38       98.83      4.67 o 
   3   0   3      882.50      773.26      7.61 o 
   4   0   3        3.78        9.83      0.44 o 
   5   0   3      423.91      478.16      5.48 o 
   6   0   3       15.11       14.74      0.67 o 
   7   0   3       13.51       11.18      0.65 o 
   8   0   3       16.69       18.30      1.21 o 
   9   0   3       35.92       48.04      2.55 o 
  10   0   3       23.67       32.25      2.32 o 
  11   0   3        0.96       -0.10      2.18 o 
 -10   1   3        0.76       -1.14      1.90 o 
  -9   1   3        0.97       -1.66      1.57 o 
  -8   1   3        2.50        4.31      0.95 o 
  -7   1   3       22.04       24.55      1.28 o 
  -6   1   3        1.37        2.14      0.66 o 
  -5   1   3       74.53       69.28      1.41 o 
  -4   1   3     1550.80     1634.18     19.37 o 
  -3   1   3      141.66      138.30      1.88 o 
  -2   1   3      135.62      220.27      2.64 o 
  -1   1   3      217.13      199.99      2.36 o 
   0   1   3    14920.46    15764.26    163.17 o 
   1   1   3      460.45      414.92      4.29 o 
   2   1   3      819.22      994.00     33.62 o 
   3   1   3     1308.02     1359.59     14.30 o 
   4   1   3       44.33       38.91      1.11 o 
   5   1   3       37.99       25.18      0.74 o 
   6   1   3      344.76      331.28      4.06 o 
   7   1   3        1.00        0.28      0.49 o 
   8   1   3        1.22       -1.18      0.79 o 
   9   1   3        0.72       -2.08      1.39 o 
  10   1   3      111.59      125.98      3.59 o 
  11   1   3       62.23       58.94      3.99 o 
 -10   2   3        0.69       -1.19      1.38 o 
  -9   2   3       18.88       19.10      2.15 o 
  -8   2   3        6.97        3.79      1.03 o 
  -7   2   3       63.84       49.74      1.72 o 
  -6   2   3       38.49       35.65      1.59 o 
  -5   2   3       38.30       34.69      1.08 o 
  -4   2   3      568.13      606.89      8.19 o 
  -3   2   3     4033.60     3933.20     61.56 o 
  -2   2   3       13.61        6.86      0.74 o 
  -1   2   3      257.99      242.71      2.75 o 
   0   2   3      282.06      280.64      3.07 o 
   1   2   3     4047.06     3911.74     40.49 o 
   2   2   3     1263.45     1256.81     14.70 o 
   3   2   3     1813.87     1724.52     18.07 o 
   4   2   3      246.83      259.02      2.95 o 
   5   2   3       20.42       18.05      0.62 o 
   6   2   3      345.50      349.06      4.23 o 
   7   2   3        2.23        1.81      0.49 o 
   8   2   3      280.14      291.13      4.37 o 
   9   2   3       37.87       31.21      2.58 o 
  10   2   3       16.11       18.04      1.62 o 
  11   2   3        7.84        6.84      4.22 o 
 -10   3   3       13.23        6.45      1.79 o 
  -9   3   3      227.20      235.08      6.74 o 
  -8   3   3        3.59       -1.48      0.99 o 
  -7   3   3        0.37       -0.57      0.68 o 
  -6   3   3        4.36        5.34      0.62 o 
  -5   3   3       75.63       69.18      1.49 o 
  -4   3   3     1367.19     1422.94     15.97 o 
  -3   3   3      314.38      319.58      3.91 o 
  -2   3   3       16.10       15.17      0.52 o 
  -1   3   3      439.46      521.90      6.71 o 
   0   3   3       27.91       19.93      0.43 o 
   1   3   3     3114.68     2942.64     43.75 o 
   2   3   3      779.93      717.05      8.53 o 
   3   3   3        6.53        6.02      0.42 o 
   4   3   3       25.63       20.93      0.67 o 
   5   3   3     2932.50     3137.75     32.90 o 
   6   3   3      160.50      190.82      2.63 o 
   7   3   3       68.71       72.68      1.51 o 
   8   3   3        4.67        1.12      0.78 o 
   9   3   3        7.27        7.18      1.21 o 
  10   3   3        1.22        2.42      1.25 o 
  11   3   3        1.89        1.13      1.49 o 
 -10   4   3       32.01       38.88      2.80 o 
  -9   4   3       93.63       84.00      2.83 o 
  -8   4   3        1.10       -0.08      1.05 o 
  -7   4   3       19.82       20.84      1.52 o 
  -6   4   3      232.22      241.81      3.63 o 
  -5   4   3       22.15       22.37      0.86 o 
  -4   4   3        0.09       -0.38      0.32 o 
  -3   4   3      670.01      689.28      7.95 o 
  -2   4   3      979.67      884.03     15.63 o 
  -1   4   3     2846.59     2717.77     33.79 o 
   0   4   3      141.04      104.44      2.27 o 
   1   4   3      102.00      113.07      4.22 o 
   2   4   3       96.51       85.59      2.10 o 
   3   4   3        0.61        2.72      0.46 o 
   4   4   3      799.19      808.74      9.25 o 
   5   4   3       33.04       36.29      1.05 o 
   6   4   3      108.08      130.29      2.26 o 
   7   4   3        2.58        5.63      0.70 o 
   8   4   3       11.13       14.33      1.27 o 
   9   4   3       17.32       15.58      1.79 o 
  10   4   3        1.20        3.08      1.45 o 
  11   4   3        5.24        3.72      2.94 o 
 -10   5   3        0.77       -0.35      2.97 o 
  -9   5   3        1.94        6.13      1.20 o 
  -8   5   3        0.73       -0.37      0.92 o 
  -7   5   3       72.96       78.61      2.71 o 
  -6   5   3        2.65        1.44      0.58 o 
  -5   5   3       53.11       42.64      1.30 o 
  -4   5   3      198.26      195.24      2.88 o 
  -3   5   3        4.80        1.94      0.37 o 
  -2   5   3       36.35      128.47      5.27 o 
  -1   5   3       38.26       38.47      0.90 o 
   1   5   3      176.31      188.88      7.64 o 
   2   5   3       36.86       50.57      1.91 o 
   3   5   3       25.97       25.04      0.66 o 
   4   5   3      201.99      179.95      2.41 o 
   5   5   3       70.10       68.84      1.32 o 
   6   5   3      140.50      143.43      2.27 o 
   7   5   3      262.71      273.21      4.33 o 
   8   5   3        8.33        5.97      1.17 o 
   9   5   3       32.91       30.02      1.95 o 
  10   5   3        0.38       -1.88      1.25 o 
 -10   6   3        7.36       15.22      3.92 o 
  -9   6   3        0.01        2.47      1.44 o 
  -8   6   3        4.24        3.66      1.16 o 
  -7   6   3       47.94       54.00      2.48 o 
  -6   6   3       18.91       16.07      1.18 o 
  -5   6   3      363.77      367.43      5.56 o 
  -4   6   3       54.69       51.58      2.62 o 
  -3   6   3        3.40        4.34      0.46 o 
  -2   6   3       27.47       78.11      3.59 o 
  -1   6   3      256.04      249.51      5.28 o 
   0   6   3      192.14      175.23      7.14 o 
   1   6   3      212.62      225.46      9.01 o 
   3   6   3        8.84       11.00      0.75 o 
   4   6   3      135.37      129.25      1.84 o 
   5   6   3       38.27       38.47      0.98 o 
   6   6   3       80.99       85.95      1.63 o 
   7   6   3       56.43       50.87      1.83 o 
   8   6   3       14.75       15.06      1.52 o 
   9   6   3        2.05        1.78      1.29 o 
  10   6   3       12.02        8.31      1.68 o 
  -9   7   3        1.35        1.35      1.53 o 
  -8   7   3       12.19       20.05      2.06 o 
  -7   7   3       85.72       88.28      3.63 o 
  -6   7   3       56.40       49.94      2.10 o 
  -5   7   3       35.38       24.44      1.14 o 
  -4   7   3      403.70      407.62      5.35 o 
  -3   7   3      548.06      539.58      7.17 o 
  -2   7   3      189.49      185.71      2.66 o 
  -1   7   3       87.62       84.65      2.17 o 
   0   7   3      299.19      343.35     12.83 o 
   1   7   3       20.38       23.48      2.37 o 
   2   7   3      169.51      151.10      6.96 o 
   3   7   3       43.13       49.86      3.12 o 
   4   7   3        5.27        7.59      0.87 o 
   5   7   3        3.31        5.88      0.52 o 
   6   7   3       46.06       43.48      1.30 o 
   7   7   3       81.77       74.15      2.01 o 
   8   7   3       80.74       59.83      2.75 o 
   9   7   3        3.55        4.34      1.40 o 
  -9   8   3        0.41        2.13      1.51 o 
  -8   8   3        8.10        4.80      2.36 o 
  -7   8   3        4.60        6.95      1.58 o 
  -6   8   3      414.09      414.57      9.45 o 
  -5   8   3       41.56       37.12      1.70 o 
  -4   8   3        6.29        7.09      2.02 o 
  -3   8   3        9.48        8.19      0.65 o 
  -2   8   3       92.77       98.41      1.94 o 
  -1   8   3       81.10       80.08      2.15 o 
   0   8   3       45.07       41.97      2.94 o 
   1   8   3      296.62      296.96     11.68 o 
   2   8   3      303.13      317.57     12.68 o 
   3   8   3       51.45       47.74      1.94 o 
   4   8   3       55.64       58.79      1.42 o 
   5   8   3       65.63       68.92      1.82 o 
   6   8   3        0.64        2.22      0.57 o 
   7   8   3       14.80       16.32      1.20 o 
   8   8   3        0.20        0.42      1.11 o 
   9   8   3       20.42       16.86      2.90 o 
  -8   9   3        0.38        1.07      1.45 o 
  -7   9   3       80.54       81.97      3.39 o 
  -6   9   3       23.05       23.20      1.87 o 
  -5   9   3       25.28       27.12      1.39 o 
  -4   9   3        0.00       -1.09      0.72 o 
  -3   9   3       26.36       28.26      1.12 o 
  -2   9   3       42.54       79.37      3.17 o 
  -1   9   3       12.01       12.62      1.03 o 
   0   9   3       36.56       41.92      3.09 o 
   1   9   3       48.16       55.50      3.92 o 
   2   9   3     1827.50     1849.13     63.41 o 
   3   9   3      419.48      408.20     15.92 o 
   4   9   3      209.66      212.11      4.61 o 
   5   9   3        0.06       -0.15      0.58 o 
   6   9   3        4.24        3.51      0.79 o 
   7   9   3        4.94        8.32      1.25 o 
   8   9   3        3.76        5.04      1.24 o 
  -7  10   3        0.65        0.48      1.31 o 
  -6  10   3       51.63       58.05      2.74 o 
  -5  10   3       95.30       96.52      4.51 o 
  -4  10   3        3.11        3.77      0.69 o 
  -3  10   3        8.51        5.11      0.95 o 
  -2  10   3       20.56       20.68      1.06 o 
  -1  10   3        0.22       -0.66      0.67 o 
   0  10   3       24.83       34.52      1.91 o 
   1  10   3       15.74       18.39      2.52 o 
   2  10   3        5.36        8.01      1.13 o 
   3  10   3       33.63       31.44      2.06 o 
   4  10   3       12.43       10.88      0.84 o 
   5  10   3        7.17        7.15      0.88 o 
   6  10   3        0.23        0.03      0.75 o 
   7  10   3        0.01        0.63      1.32 o 
  -6  11   3       32.65       36.42      2.21 o 
  -5  11   3       10.59       12.53      1.37 o 
  -4  11   3       76.14       72.48      3.41 o 
  -3  11   3        0.88       -1.13      0.75 o 
  -2  11   3        7.63        9.24      1.15 o 
  -1  11   3       20.44       21.62      1.31 o 
   0  11   3       24.67       23.44      1.54 o 
   1  11   3        0.11        1.62      1.07 o 
   2  11   3       66.38       65.05      2.43 o 
   3  11   3       20.06       17.93      0.99 o 
   4  11   3       31.74       34.07      1.39 o 
   5  11   3        1.36        1.86      0.79 o 
  -4  12   3        0.48        1.05      1.06 o 
  -3  12   3        0.38        0.54      0.81 o 
  -2  12   3        0.07        2.61      0.79 o 
  -1  12   3        6.98        7.72      1.30 o 
   0  12   3       11.11       12.78      1.13 o 
   1  12   3        0.45        0.87      1.32 o 
   2  12   3       78.41       69.07      3.74 o 
   3  12   3       20.27       17.71      0.91 o 
   1 -10   4        0.37       -0.95      1.33 o 
   2 -10   4        2.13       -0.94      1.39 o 
  -3  -9   4        3.47        0.86      1.36 o 
  -2  -9   4        9.24        7.34      1.58 o 
  -1  -9   4        2.81        4.91      1.43 o 
   0  -9   4        0.99        0.15      1.23 o 
   1  -9   4        0.95       -0.88      1.44 o 
   2  -9   4        0.16       -1.06      1.20 o 
   3  -9   4        5.10        4.10      1.58 o 
   4  -9   4        0.64        3.19      1.57 o 
   5  -9   4        4.57        3.76      1.61 o 
   6  -9   4        7.27        8.67      1.89 o 
  -4  -8   4        8.67        9.44      1.42 o 
  -3  -8   4       28.02       29.11      1.87 o 
  -2  -8   4        1.69        5.86      1.08 o 
  -1  -8   4       29.79       30.81      1.74 o 
   0  -8   4       12.99       13.05      1.34 o 
   1  -8   4       46.80       46.88      2.52 o 
   2  -8   4       10.42       10.41      1.53 o 
   3  -8   4        6.32        4.14      1.46 o 
   4  -8   4        7.92       11.45      2.18 o 
   5  -8   4        4.30        7.51      1.67 o 
   6  -8   4        7.09        4.30      1.56 o 
   7  -8   4        0.65       -0.55      1.51 o 
  -6  -7   4        1.43        1.67      1.13 o 
  -5  -7   4        5.95        5.28      1.56 o 
  -4  -7   4        9.97        6.08      1.25 o 
  -3  -7   4        1.65        0.79      1.06 o 
  -2  -7   4       15.16       14.06      1.37 o 
  -1  -7   4       61.98       53.95      2.18 o 
   0  -7   4       83.48       83.46      2.34 o 
   1  -7   4       12.01       13.57      1.06 o 
   2  -7   4       43.98       44.52      1.64 o 
   3  -7   4       48.10       41.40      2.34 o 
   4  -7   4       40.56       45.93      2.54 o 
   5  -7   4        1.28        1.93      2.03 o 
   6  -7   4        6.83        5.68      1.55 o 
   7  -7   4       40.64       43.19      2.69 o 
   8  -7   4        0.01       -1.92      1.40 o 
  -7  -6   4        0.83        2.51      1.35 o 
  -6  -6   4        0.00        0.73      1.15 o 
  -5  -6   4       42.42       40.36      1.98 o 
  -4  -6   4        0.99        0.06      0.99 o 
  -3  -6   4       14.10       11.59      1.22 o 
  -2  -6   4        6.28        4.79      0.84 o 
  -1  -6   4        4.30        2.04      0.74 o 
   0  -6   4       82.53       86.42      1.96 o 
   1  -6   4        5.44        6.14      0.73 o 
   2  -6   4        8.08       10.02      0.80 o 
   3  -6   4        2.24        1.60      0.72 o 
   4  -6   4       37.32       37.64      1.70 o 
   5  -6   4       85.70       78.59      2.99 o 
   6  -6   4       28.20       30.01      1.87 o 
   7  -6   4        0.53       -1.43      1.30 o 
   8  -6   4       71.71       72.32      3.47 o 
   9  -6   4        8.58       15.53      2.71 o 
  -7  -5   4       22.78       26.35      2.01 o 
  -6  -5   4        9.77        9.93      1.29 o 
  -5  -5   4       13.41       13.13      1.17 o 
  -4  -5   4        2.95        7.01      1.41 o 
  -3  -5   4       79.33       72.96      1.88 o 
  -2  -5   4        5.13       23.49      1.56 o 
  -1  -5   4      194.20      199.28      3.31 o 
   0  -5   4      217.43      234.35      3.71 o 
   1  -5   4       44.96       46.01      1.39 o 
   2  -5   4        0.22        3.63      0.75 o 
   3  -5   4       35.36       41.14      1.23 o 
   4  -5   4       14.08       13.59      0.81 o 
   5  -5   4        3.45        0.90      0.68 o 
   6  -5   4        8.24       13.10      1.64 o 
   7  -5   4       81.25       79.81      2.92 o 
   8  -5   4        2.50        3.25      1.32 o 
   9  -5   4        8.82        6.81      1.88 o 
  10  -5   4        3.08       -4.57      3.04 o 
  -8  -4   4        2.95        3.75      1.77 o 
  -7  -4   4       20.48       17.33      2.79 o 
  -6  -4   4       65.30       68.78      2.50 o 
  -5  -4   4       64.72       60.21      2.02 o 
  -4  -4   4       54.04       86.29      2.34 o 
  -3  -4   4       23.40       29.09      1.02 o 
  -2  -4   4       10.46       11.66      0.73 o 
  -1  -4   4      213.85      194.67      3.11 o 
   0  -4   4      490.49      511.29      6.58 o 
   1  -4   4      620.41      572.64      6.82 o 
   2  -4   4      119.40      115.83      1.90 o 
   3  -4   4       10.92        9.88      0.67 o 
   4  -4   4       56.68       57.10      1.72 o 
   5  -4   4       77.87       70.41      1.48 o 
   6  -4   4        0.04       -0.70      0.54 o 
   7  -4   4      134.23      122.57      3.58 o 
   8  -4   4        0.82        1.73      1.25 o 
   9  -4   4        0.50        0.27      1.47 o 
  10  -4   4        0.82       -3.09      2.06 o 
  -9  -3   4       12.86       10.86      3.57 o 
  -8  -3   4        5.36        4.01      1.59 o 
  -7  -3   4      204.69      205.98      4.68 o 
  -6  -3   4      121.66      121.24      3.65 o 
  -5  -3   4      146.20      133.65      3.39 o 
  -4  -3   4        6.20       10.50      1.49 o 
  -3  -3   4       43.68       49.56      1.16 o 
  -2  -3   4       16.73       41.91      1.89 o 
  -1  -3   4        6.17       14.06      0.65 o 
   0  -3   4        2.70        2.11      0.36 o 
   1  -3   4        1.63        0.72      0.34 o 
   2  -3   4     1707.35     1659.05     19.60 o 
   3  -3   4       78.85       75.68      1.44 o 
   4  -3   4      270.60      237.62      3.23 o 
   5  -3   4       57.86       53.59      1.30 o 
   6  -3   4       12.00        7.47      0.62 o 
   7  -3   4      305.83      304.80      5.21 o 
   8  -3   4       31.83       36.60      2.11 o 
   9  -3   4       14.26       13.95      3.53 o 
  10  -3   4       39.44       45.50      3.77 o 
  11  -3   4        6.10        4.97      2.46 o 
  -9  -2   4        4.47        5.20      2.26 o 
  -8  -2   4        5.20        6.10      1.41 o 
  -7  -2   4       60.93       57.40      2.57 o 
  -6  -2   4      185.13      198.46      4.90 o 
  -5  -2   4       35.88       42.63      1.84 o 
  -4  -2   4       51.86       75.73      2.31 o 
  -3  -2   4      107.37      112.98      1.79 o 
  -2  -2   4      374.90      411.62      5.06 o 
  -1  -2   4       22.41       27.31      0.85 o 
   0  -2   4       14.29       16.89      0.62 o 
   1  -2   4      863.71      835.52     10.17 o 
   2  -2   4        3.33       39.53      2.94 o 
   3  -2   4      794.33      773.37     10.17 o 
   4  -2   4     1061.41     1052.10     12.78 o 
   5  -2   4        5.81        7.91      0.59 o 
   6  -2   4      158.67      149.87      2.71 o 
   7  -2   4        3.74        5.18      0.97 o 
   8  -2   4        0.26       -1.16      0.77 o 
   9  -2   4       66.79       69.09      4.18 o 
  10  -2   4        1.99        0.76      2.11 o 
  11  -2   4        6.48       12.09      3.97 o 
  -9  -1   4        0.01        5.87      2.29 o 
  -8  -1   4       28.36       34.33      1.92 o 
  -7  -1   4       46.51       33.44      1.96 o 
  -6  -1   4        3.74        2.61      0.86 o 
  -5  -1   4       36.59       37.97      1.53 o 
  -4  -1   4        0.67        0.90      0.34 o 
  -3  -1   4       95.59       71.83      1.43 o 
  -2  -1   4     1548.52     1626.36     20.65 o 
  -1  -1   4      154.86      128.55      2.15 o 
   0  -1   4       82.73       77.02      1.16 o 
   1  -1   4      591.59      655.82      6.82 o 
   2  -1   4     1145.32     1072.84     11.44 o 
   3  -1   4      855.85      955.33     10.28 o 
   4  -1   4     3805.39     3808.50     37.75 o 
   5  -1   4      258.47      252.86      4.17 o 
   6  -1   4       10.68       10.79      0.76 o 
   7  -1   4       17.75       11.37      0.86 o 
   8  -1   4        0.03       -1.08      0.72 o 
   9  -1   4       17.46       18.60      1.68 o 
  10  -1   4       44.96       39.45      3.86 o 
  11  -1   4       11.75       16.69      5.40 o 
 -10   0   4        7.13        7.02      3.41 o 
  -9   0   4        0.04       -0.31      1.92 o 
  -8   0   4        0.19        0.07      1.77 o 
  -7   0   4      158.07      138.07      3.85 o 
  -6   0   4       18.26       18.07      1.14 o 
  -5   0   4       26.25       22.62      1.17 o 
  -4   0   4        4.57        7.23      0.54 o 
  -3   0   4       46.99       70.14      1.19 o 
  -2   0   4       44.43      166.20      3.99 o 
  -1   0   4        0.53        3.13      0.44 o 
   0   0   4     1004.71     1043.71     10.58 o 
   1   0   4      194.85      190.17      2.23 o 
   2   0   4      861.33     1123.29     14.93 o 
   3   0   4      471.78      494.14      5.51 o 
   4   0   4     1327.35     1364.80     15.33 o 
   5   0   4     2278.41     2181.47     24.25 o 
   6   0   4       64.52       55.72      1.46 o 
   7   0   4        0.80        0.02      0.46 o 
   8   0   4        2.37        0.54      0.56 o 
   9   0   4       68.24       70.90      2.21 o 
  10   0   4        0.98        0.20      1.71 o 
  11   0   4        0.33        6.62      1.89 o 
 -10   1   4        0.15       -0.29      2.11 o 
  -9   1   4        3.45        4.98      1.65 o 
  -8   1   4        5.55        6.04      2.11 o 
  -7   1   4       35.27       37.86      1.59 o 
  -6   1   4        7.12       10.89      1.32 o 
  -5   1   4      107.41      122.68      2.56 o 
  -4   1   4       53.03       53.55      1.92 o 
  -3   1   4     1153.51     1147.53     13.01 o 
  -2   1   4      940.09     1031.25     11.20 o 
  -1   1   4      112.09       99.42      1.40 o 
   0   1   4      325.41      355.90      4.77 o 
   1   1   4      368.55      340.16      4.04 o 
   2   1   4      295.11      296.35      3.56 o 
   3   1   4       28.70       19.46      0.65 o 
   4   1   4      694.06      715.86      7.85 o 
   5   1   4      281.33      307.53      3.75 o 
   6   1   4        9.62        5.87      0.67 o 
   7   1   4       89.79       81.26      1.59 o 
   8   1   4       39.21       37.34      1.36 o 
   9   1   4        9.21        8.70      1.25 o 
  10   1   4       67.70       79.03      2.89 o 
  11   1   4       11.80       12.26      2.16 o 
 -10   2   4        0.74       -1.32      1.93 o 
  -9   2   4       30.48       33.72      2.59 o 
  -8   2   4       27.68       17.90      1.65 o 
  -7   2   4       27.47       24.13      1.32 o 
  -6   2   4        1.34        0.83      0.65 o 
  -5   2   4        5.06        5.71      0.56 o 
  -4   2   4      102.03       91.16      1.81 o 
  -3   2   4      386.79      376.09      4.63 o 
  -2   2   4      207.75      274.40      3.64 o 
  -1   2   4       88.78       90.43      1.43 o 
   0   2   4      896.27      946.84     10.58 o 
   1   2   4        9.27        4.88      0.28 o 
   2   2   4       64.07       59.34      1.13 o 
   3   2   4       22.63       22.45      0.62 o 
   4   2   4      210.44      241.94      2.95 o 
   5   2   4       48.56       52.26      1.30 o 
   6   2   4        7.17        5.66      0.61 o 
   7   2   4       14.01       15.04      0.74 o 
   8   2   4      192.43      203.51      3.96 o 
   9   2   4       48.51       50.87      2.20 o 
  10   2   4       11.90        5.95      1.34 o 
  11   2   4        2.13        0.21      2.07 o 
 -10   3   4        0.14       -2.40      1.99 o 
  -9   3   4        4.52        1.22      2.28 o 
  -8   3   4        0.22       -0.95      1.12 o 
  -7   3   4       27.25       32.25      2.00 o 
  -6   3   4       24.08       28.86      1.04 o 
  -5   3   4       87.19      107.51      1.77 o 
  -4   3   4        0.12        0.04      0.32 o 
  -3   3   4      144.29      185.33      2.68 o 
  -2   3   4     1169.23     1101.63     11.73 o 
  -1   3   4     4350.82     4223.59     48.87 o 
   0   3   4      619.43      694.84      7.80 o 
   1   3   4      391.86      348.78      4.29 o 
   2   3   4        0.14        2.47      0.46 o 
   3   3   4      139.57      107.38      1.63 o 
   4   3   4      802.96      785.51      9.55 o 
   5   3   4      510.89      559.84      6.68 o 
   6   3   4       74.49       73.37      1.44 o 
   7   3   4       24.21       23.50      0.91 o 
   8   3   4       37.98       42.31      1.83 o 
   9   3   4        0.90        1.24      1.08 o 
  10   3   4        6.35        5.49      1.37 o 
  11   3   4        0.05        0.30      1.46 o 
 -10   4   4        2.74        2.60      1.63 o 
  -9   4   4       26.46       19.40      1.88 o 
  -8   4   4        1.63        1.87      1.12 o 
  -7   4   4       14.54       12.31      1.36 o 
  -6   4   4        7.62        5.79      0.64 o 
  -5   4   4        9.15        6.98      0.58 o 
  -4   4   4      592.83      629.10      7.43 o 
  -3   4   4        2.23        2.77      0.42 o 
  -2   4   4       21.30       20.20      0.93 o 
  -1   4   4      570.09      575.54      6.97 o 
   0   4   4      382.43      513.28      6.59 o 
   1   4   4     2374.14     2396.83     29.89 o 
   2   4   4        9.34       25.45      4.93 o 
   3   4   4       41.29       41.87      0.84 o 
   4   4   4      318.25      324.83      4.23 o 
   5   4   4       11.25        8.55      0.55 o 
   6   4   4       64.09       54.93      1.67 o 
   7   4   4        3.06       -0.88      0.58 o 
   8   4   4        9.57        5.75      1.07 o 
   9   4   4       31.37       38.05      2.06 o 
  10   4   4        6.86        8.86      2.77 o 
  11   4   4        1.03        1.24      1.53 o 
 -10   5   4        0.03       -0.66      1.69 o 
  -9   5   4        6.46        8.54      1.91 o 
  -8   5   4        2.56        2.49      1.14 o 
  -7   5   4       11.83       12.03      1.55 o 
  -6   5   4      130.45      135.41      4.06 o 
  -5   5   4      164.01      158.21      2.81 o 
  -4   5   4      167.67      196.99      7.90 o 
  -3   5   4      133.06      128.59      2.33 o 
  -2   5   4      245.31      310.15      6.52 o 
  -1   5   4      998.97     1053.37     13.28 o 
   0   5   4      374.66      584.89      9.98 o 
   1   5   4     1257.72     1344.49     26.00 o 
   2   5   4      673.16      626.23     10.79 o 
   3   5   4      231.18      235.17      3.03 o 
   4   5   4       63.11       59.25      1.15 o 
   5   5   4        1.94        1.45      0.44 o 
   6   5   4       87.95       80.05      1.58 o 
   7   5   4       36.18       35.84      1.32 o 
   8   5   4        3.63        4.14      1.11 o 
   9   5   4        1.84       -0.32      1.08 o 
  10   5   4        0.01       -1.85      1.23 o 
  -9   6   4       10.73       16.63      1.68 o 
  -8   6   4       15.94       17.14      1.85 o 
  -7   6   4       43.76       47.53      2.20 o 
  -6   6   4      365.86      381.73      6.87 o 
  -5   6   4       51.08       51.73      1.58 o 
  -4   6   4      780.92      776.57     11.09 o 
  -3   6   4      337.37      346.30      4.84 o 
  -2   6   4       25.62       43.16      1.74 o 
  -1   6   4        6.20        4.03      0.31 o 
   0   6   4       54.13       64.84      1.93 o 
   1   6   4       73.30       54.60      3.39 o 
   2   6   4      333.23      317.68      8.26 o 
   3   6   4        4.45        3.97      0.57 o 
   4   6   4       66.67       63.48      1.17 o 
   5   6   4      170.38      186.23      2.59 o 
   6   6   4        9.10        9.48      0.82 o 
   7   6   4       28.04       31.64      1.31 o 
   8   6   4       73.57       64.23      2.48 o 
   9   6   4        1.42        0.45      1.20 o 
  10   6   4        3.18        2.95      1.47 o 
  -9   7   4        3.91        5.08      1.62 o 
  -8   7   4        3.44        3.79      1.46 o 
  -7   7   4      148.87      165.53      4.98 o 
  -6   7   4     1163.16     1174.60     23.66 o 
  -5   7   4      835.54      806.52     11.71 o 
  -4   7   4      125.93      120.57      3.13 o 
  -3   7   4       90.90       99.32      1.81 o 
  -2   7   4      248.64      255.62      3.56 o 
  -1   7   4      398.15      351.59      8.81 o 
   0   7   4       56.04       48.06      3.14 o 
   1   7   4        6.90        6.59      1.60 o 
   3   7   4        4.18        5.77      0.73 o 
   4   7   4      435.14      423.59      6.75 o 
   5   7   4        8.34        7.25      0.66 o 
   6   7   4        0.08       -0.48      0.50 o 
   7   7   4       25.43       27.38      1.28 o 
   8   7   4       39.90       33.46      2.06 o 
   9   7   4        4.58        6.95      1.46 o 
  -8   8   4       78.91       85.00      3.62 o 
  -7   8   4        1.10        2.01      1.37 o 
  -6   8   4       25.29       21.51      1.86 o 
  -5   8   4       54.47       53.25      1.87 o 
  -4   8   4       88.33       85.07      2.85 o 
  -3   8   4       77.75       74.90      1.67 o 
  -2   8   4       22.08       31.17      2.50 o 
  -1   8   4       15.54       12.30      0.88 o 
   0   8   4       45.51       61.11      3.67 o 
   1   8   4       74.90       84.35      4.69 o 
   2   8   4       10.00       20.51      2.57 o 
   3   8   4       66.54       66.37      2.52 o 
   4   8   4      256.52      231.11      3.98 o 
   5   8   4       66.97       70.52      1.94 o 
   6   8   4       15.13       14.69      1.03 o 
   7   8   4        3.40        6.22      0.83 o 
   8   8   4        0.20        0.74      1.04 o 
   9   8   4        0.75        0.80      1.27 o 
  -8   9   4        5.29        4.97      1.60 o 
  -7   9   4        5.67        5.54      2.07 o 
  -6   9   4       19.01       25.96      1.89 o 
  -5   9   4       11.67       13.99      1.10 o 
  -4   9   4      169.27      176.73      4.51 o 
  -3   9   4       10.47        7.49      0.70 o 
  -2   9   4        1.13        0.11      0.48 o 
  -1   9   4       22.20       27.24      1.29 o 
   0   9   4       51.06       49.24      3.37 o 
   1   9   4       56.88       59.64      4.02 o 
   2   9   4      330.02      365.28     14.55 o 
   3   9   4        9.64        9.62      3.02 o 
   4   9   4        0.02       -0.21      0.79 o 
   5   9   4        0.03        0.25      0.62 o 
   6   9   4       37.84       38.54      1.73 o 
   7   9   4        5.57        3.48      1.18 o 
   8   9   4        2.39        1.72      1.10 o 
  -7  10   4        1.46        3.98      1.39 o 
  -6  10   4        0.01        0.31      1.12 o 
  -5  10   4        0.17       -0.11      0.89 o 
  -4  10   4        0.92        2.84      0.64 o 
  -3  10   4      216.60      204.40      4.22 o 
  -2  10   4       85.37       80.27      1.91 o 
  -1  10   4        5.06        4.51      0.86 o 
   0  10   4        0.30       -1.22      1.32 o 
   1  10   4        2.17        0.02      1.47 o 
   2  10   4       27.86       38.93      3.67 o 
   3  10   4        4.41        3.49      1.92 o 
   4  10   4        0.41        0.27      0.74 o 
   5  10   4        1.39        1.46      0.68 o 
   6  10   4        0.54        0.04      0.74 o 
   7  10   4        0.03        0.72      1.01 o 
  -6  11   4       17.33       20.12      1.76 o 
  -5  11   4        0.00        0.12      0.96 o 
  -4  11   4        0.14       -0.03      0.84 o 
  -3  11   4       29.52       27.81      1.39 o 
  -2  11   4       58.12       60.12      1.81 o 
  -1  11   4        6.67        7.60      1.93 o 
   2  11   4       21.66       30.15      3.32 o 
   4  11   4       31.69       31.84      1.51 o 
   5  11   4       10.86       12.53      0.98 o 
   6  11   4        0.48        0.14      0.76 o 
  -4  12   4        0.50       -0.19      0.98 o 
  -3  12   4        1.34        3.38      0.85 o 
  -2  12   4       49.16       46.85      2.00 o 
  -1  12   4        1.45        1.33      1.71 o 
   4  12   4        0.45       -0.51      0.58 o 
   0  -9   5        0.11       -2.03      1.35 o 
   1  -9   5        8.73        9.55      1.76 o 
   2  -9   5        2.58        3.10      1.61 o 
   3  -9   5        1.64        0.26      1.52 o 
   4  -9   5        5.17        4.32      1.80 o 
  -3  -8   5       16.16       21.17      1.97 o 
  -2  -8   5        2.12        1.60      1.08 o 
  -1  -8   5        1.15        2.56      1.41 o 
   0  -8   5        1.22        0.33      1.30 o 
   1  -8   5        9.38       11.55      1.71 o 
   2  -8   5       27.26       28.20      2.20 o 
   3  -8   5       14.47       16.75      3.06 o 
   4  -8   5       62.42       66.49      3.33 o 
   5  -8   5        7.50       10.11      1.84 o 
   6  -8   5        0.71        2.57      1.62 o 
  -5  -7   5       10.83        6.75      1.79 o 
  -4  -7   5        4.92        4.75      1.33 o 
  -3  -7   5       12.96       15.24      1.42 o 
  -2  -7   5        0.53       -1.51      1.01 o 
  -1  -7   5       16.12       14.35      1.43 o 
   0  -7   5        0.06        0.03      0.91 o 
   1  -7   5        0.17       -1.64      1.09 o 
   2  -7   5        7.86        4.85      1.36 o 
   3  -7   5        7.40        7.36      1.54 o 
   4  -7   5       68.73       70.67      3.22 o 
   5  -7   5       51.10       51.16      2.87 o 
   6  -7   5        0.95        1.88      1.46 o 
   7  -7   5       12.27       10.20      1.93 o 
   8  -7   5        0.19        1.53      1.66 o 
  -6  -6   5        1.39        4.19      1.50 o 
  -5  -6   5       26.78       22.67      3.43 o 
  -4  -6   5        6.85        6.55      1.38 o 
  -3  -6   5       40.12       39.94      2.14 o 
  -2  -6   5        0.45        1.44      1.35 o 
  -1  -6   5      223.33      212.10      5.74 o 
   0  -6   5        5.10        5.75      1.16 o 
   1  -6   5       20.08       16.13      1.39 o 
   2  -6   5        1.66        1.40      1.09 o 
   3  -6   5       35.81       42.28      2.06 o 
   4  -6   5       19.05       26.96      1.77 o 
   5  -6   5        1.31        2.35      1.19 o 
   6  -6   5       17.96       18.65      1.96 o 
   7  -6   5       15.26       16.33      2.00 o 
   8  -6   5       12.85       14.87      2.02 o 
   9  -6   5        3.23        0.52      3.29 o 
  -7  -5   5        3.12        5.43      1.55 o 
  -6  -5   5        5.58        2.81      1.63 o 
  -5  -5   5       39.50       36.74      1.93 o 
  -4  -5   5       46.95       55.69      2.88 o 
  -3  -5   5       18.65       18.98      1.43 o 
  -2  -5   5        0.48        1.86      1.06 o 
  -1  -5   5      194.09      185.41      3.53 o 
   0  -5   5       32.02       37.14      1.46 o 
   1  -5   5       24.52       23.16      1.21 o 
   2  -5   5      183.75      187.04      3.52 o 
   3  -5   5        3.60        1.73      0.70 o 
   4  -5   5       88.82       93.31      2.92 o 
   5  -5   5      108.79      109.19      2.69 o 
   6  -5   5       26.98       27.12      1.85 o 
   7  -5   5       26.08       30.28      2.45 o 
   8  -5   5       47.77       48.62      2.70 o 
   9  -5   5        2.10        6.77      2.32 o 
  -7  -4   5       11.80        9.55      1.58 o 
  -6  -4   5       25.84       31.68      2.07 o 
  -5  -4   5      250.52      226.43      4.90 o 
  -4  -4   5       18.33       25.68      2.78 o 
  -3  -4   5       28.65       25.09      1.53 o 
  -2  -4   5       75.70       60.22      2.25 o 
  -1  -4   5        5.16        4.05      0.55 o 
   0  -4   5        0.09       -0.11      0.44 o 
   1  -4   5      265.15      254.79      4.11 o 
   2  -4   5       28.74       20.88      0.93 o 
   3  -4   5      350.17      338.58      5.06 o 
   4  -4   5       82.93       79.49      1.77 o 
   5  -4   5        0.43        0.41      0.54 o 
   6  -4   5        6.51        4.48      1.18 o 
   7  -4   5      149.84      157.74      3.69 o 
   8  -4   5       13.60       12.13      1.61 o 
   9  -4   5        0.47        0.94      1.94 o 
  10  -4   5        0.23       -0.03      4.27 o 
  -8  -3   5       21.21       16.82      3.97 o 
  -7  -3   5       65.17       72.11      2.67 o 
  -6  -3   5        0.12       -1.28      0.93 o 
  -5  -3   5       35.47       20.43      1.49 o 
  -4  -3   5      282.72      239.48      4.96 o 
  -3  -3   5       39.20       42.62      1.32 o 
  -2  -3   5       37.28       42.58      1.23 o 
  -1  -3   5        0.64        0.12      0.42 o 
   0  -3   5       13.18       16.33      0.71 o 
   1  -3   5       26.55       31.61      1.06 o 
   2  -3   5      229.16      220.00      3.27 o 
   3  -3   5      462.39      443.29      5.87 o 
   4  -3   5      312.58      307.78      4.36 o 
   5  -3   5      119.70      125.62      2.14 o 
   6  -3   5       30.55       33.22      2.25 o 
   7  -3   5       30.96       31.51      1.90 o 
   8  -3   5       71.29       58.17      2.20 o 
   9  -3   5       62.00       64.34      4.21 o 
  10  -3   5       11.87        9.85      2.99 o 
  -8  -2   5        5.49       11.02      2.50 o 
  -7  -2   5        0.46        0.02      1.53 o 
  -6  -2   5       83.42       78.63      2.73 o 
  -5  -2   5       96.05       82.58      2.41 o 
  -4  -2   5      135.83      187.76      3.60 o 
  -3  -2   5      209.32      199.73      3.18 o 
  -2  -2   5      193.78      183.33      2.84 o 
  -1  -2   5      139.15      143.30      2.33 o 
   0  -2   5      460.37      506.68      6.96 o 
   1  -2   5      419.04      413.82      5.81 o 
   2  -2   5      176.02      243.12      3.73 o 
   3  -2   5      167.81      157.71      2.72 o 
   4  -2   5      189.23      186.03      2.89 o 
   5  -2   5      157.14      138.99      2.26 o 
   6  -2   5       87.98       92.54      2.09 o 
   7  -2   5        5.90        5.71      0.99 o 
   8  -2   5       40.94       34.07      1.78 o 
   9  -2   5       14.95       14.31      1.78 o 
  10  -2   5       27.63       26.76      3.21 o 
  11  -2   5        8.09        8.12      2.68 o 
  -9  -1   5        1.37        5.54      2.43 o 
  -8  -1   5        7.11        1.39      2.07 o 
  -7  -1   5       66.26       63.87      2.44 o 
  -6  -1   5       56.69       65.40      2.30 o 
  -5  -1   5       14.51       14.43      1.14 o 
  -4  -1   5      430.08      430.69      5.59 o 
  -3  -1   5       67.45       69.71      2.19 o 
  -2  -1   5       48.47      265.73      9.44 o 
  -1  -1   5      130.93      123.66      2.06 o 
   0  -1   5     1748.86     1809.21     21.33 o 
   1  -1   5      699.52      697.38      8.59 o 
   2  -1   5     1224.98     1340.88     15.02 o 
   3  -1   5      130.90      113.34      2.36 o 
   4  -1   5      182.50      167.43      3.08 o 
   5  -1   5       77.68       76.23      1.75 o 
   6  -1   5      724.68      682.42      9.34 o 
   7  -1   5       23.59       22.19      1.16 o 
   8  -1   5       19.10       13.99      1.31 o 
   9  -1   5       30.48       33.63      3.57 o 
  10  -1   5       17.96       18.69      3.07 o 
  11  -1   5        3.28        5.76      2.71 o 
  -9   0   5       43.01       53.53      6.50 o 
  -8   0   5       37.50       32.52      3.26 o 
  -7   0   5        4.63        3.24      1.02 o 
  -6   0   5        6.17        5.16      0.80 o 
  -5   0   5       35.20       32.68      1.28 o 
  -4   0   5      103.99      115.05      2.34 o 
  -3   0   5       65.77       67.89      1.73 o 
  -2   0   5      213.01      200.84      2.64 o 
  -1   0   5       17.58       21.14      0.63 o 
   0   0   5       21.42       29.82      0.78 o 
   1   0   5      522.95      506.83      5.68 o 
   2   0   5     1230.30     1166.55     12.44 o 
   3   0   5      817.27      762.56      9.35 o 
   4   0   5      367.20      347.72      4.67 o 
   5   0   5       47.37       54.51      1.28 o 
   6   0   5      114.53      121.13      2.67 o 
   7   0   5       63.88       64.66      1.91 o 
   8   0   5      110.80       99.39      2.52 o 
   9   0   5       51.54       51.67      2.12 o 
  10   0   5       70.93       70.39      4.57 o 
  11   0   5        1.21       -0.67      2.18 o 
  -9   1   5       23.05       27.54      3.78 o 
  -8   1   5       11.38        7.57      2.36 o 
  -7   1   5       49.64       52.76      2.89 o 
  -6   1   5       30.39       38.07      1.43 o 
  -5   1   5       48.41       45.19      1.45 o 
  -4   1   5      374.69      405.69      6.33 o 
  -3   1   5       10.24        2.89      0.45 o 
  -2   1   5     2308.09     2279.10     26.76 o 
  -1   1   5      330.39      328.38      4.64 o 
   0   1   5       69.52      104.82      1.85 o 
   1   1   5     1289.93     1270.44     15.13 o 
   2   1   5      321.30      409.15     10.23 o 
   3   1   5      211.44      206.41      2.76 o 
   4   1   5       43.69       41.19      2.60 o 
   5   1   5      462.33      428.87      5.31 o 
   6   1   5        8.34        7.63      0.64 o 
   7   1   5       12.00        8.93      0.74 o 
   8   1   5       42.02       40.88      1.83 o 
   9   1   5       15.41       19.10      1.68 o 
  10   1   5      152.07      163.15      4.70 o 
  11   1   5        0.01       -4.57      4.23 o 
  -9   2   5        3.40        4.67      2.35 o 
  -8   2   5      156.77      128.35      5.77 o 
  -7   2   5       39.23       46.23      2.67 o 
  -6   2   5        3.56        4.23      0.72 o 
  -5   2   5        4.85        3.20      0.44 o 
  -4   2   5      156.63      162.20      2.82 o 
  -3   2   5       11.89       17.80      0.70 o 
  -2   2   5      478.32      464.66      5.32 o 
  -1   2   5     1292.88     1236.44     14.68 o 
   0   2   5       25.36       32.41      0.84 o 
   1   2   5     1078.85     1064.63     11.94 o 
   2   2   5      215.73      212.35      4.05 o 
   3   2   5      240.71      203.80      2.67 o 
   4   2   5     1364.71     1273.40     19.18 o 
   5   2   5        2.97        2.51      0.45 o 
   6   2   5      176.50      171.24      2.59 o 
   7   2   5       71.99       77.57      1.64 o 
   8   2   5       88.60       81.49      4.42 o 
   9   2   5        0.09        0.38      1.18 o 
  10   2   5        0.00       -1.59      1.20 o 
  11   2   5        0.39       -0.47      1.98 o 
  -9   3   5       26.45       28.53      3.21 o 
  -8   3   5       30.61       20.83      2.20 o 
  -7   3   5      278.13      238.42      6.71 o 
  -6   3   5       30.07       24.40      1.17 o 
  -5   3   5        6.43        3.52      0.61 o 
  -4   3   5       63.80       54.33      1.31 o 
  -3   3   5       67.38       70.84      1.43 o 
  -2   3   5      223.72      245.43      3.01 o 
  -1   3   5      325.22      308.19      3.59 o 
   0   3   5        1.74        6.26      0.41 o 
   1   3   5     2359.25     2193.32     25.54 o 
   2   3   5       83.57      230.55     21.52 o 
   3   3   5       84.80       87.22      1.55 o 
   4   3   5      144.77      130.20      2.64 o 
   5   3   5       51.85       63.39      1.32 o 
   6   3   5      229.47      227.11      3.21 o 
   7   3   5      243.55      265.43      3.74 o 
   8   3   5        4.42        2.14      1.05 o 
   9   3   5       36.38       44.99      2.54 o 
  10   3   5        6.73       10.21      1.69 o 
  11   3   5        7.73        9.41      1.83 o 
  -9   4   5        1.57        2.29      2.08 o 
  -8   4   5        4.30        5.44      1.32 o 
  -7   4   5       10.68       10.50      1.36 o 
  -6   4   5       41.67       49.71      3.03 o 
  -5   4   5      140.88      132.77      2.50 o 
  -4   4   5      190.43      196.18      5.36 o 
  -3   4   5        0.73       -0.02      0.40 o 
  -2   4   5       26.89       23.88      0.70 o 
  -1   4   5      817.99      823.04     11.43 o 
   0   4   5       55.34       78.10      1.38 o 
   1   4   5      292.10      318.64      4.29 o 
   2   4   5       35.95       35.00      0.92 o 
   3   4   5      152.11      158.21      2.26 o 
   4   4   5       54.90       61.62      1.25 o 
   5   4   5        6.47        5.20      0.65 o 
   6   4   5        9.00        5.54      0.63 o 
   7   4   5        8.19        9.28      0.80 o 
   8   4   5       22.45       27.67      1.72 o 
   9   4   5       13.67       17.47      1.79 o 
  10   4   5       18.05       20.00      2.03 o 
  11   4   5        0.39        1.25      1.51 o 
  -9   5   5        2.77        1.42      2.66 o 
  -8   5   5        0.48       -1.30      1.02 o 
  -7   5   5        0.20        1.10      1.03 o 
  -6   5   5       17.48       17.99      1.85 o 
  -5   5   5        4.09        1.66      0.60 o 
  -4   5   5      145.20      135.02      2.30 o 
  -3   5   5      321.90      281.71      4.96 o 
  -2   5   5       38.08       67.04      9.94 o 
  -1   5   5       43.69       47.44      1.05 o 
   0   5   5      751.80      870.19     11.05 o 
   1   5   5      396.73      387.95      5.07 o 
   2   5   5      508.13      459.61      7.01 o 
   3   5   5       26.94       24.60      0.70 o 
   4   5   5       33.90       31.57      1.35 o 
   5   5   5       12.19       10.50      0.63 o 
   6   5   5       40.06       37.93      1.19 o 
   7   5   5       18.97       15.40      1.06 o 
   8   5   5       12.06       12.12      1.50 o 
   9   5   5       10.15       12.14      1.73 o 
  10   5   5        0.39       -1.42      1.51 o 
  -9   6   5        0.08        2.20      1.48 o 
  -8   6   5        1.01        0.38      1.28 o 
  -7   6   5        6.45        8.57      1.52 o 
  -6   6   5        4.00       -0.65      1.00 o 
  -5   6   5       16.86       14.21      1.17 o 
  -4   6   5        2.45        0.89      0.54 o 
  -3   6   5      280.29      269.47      3.97 o 
  -2   6   5       64.05       56.99      1.14 o 
  -1   6   5      277.76      267.00      3.44 o 
   0   6   5        2.46        1.17      0.34 o 
   1   6   5       53.58       58.77      1.60 o 
   2   6   5      113.61      129.78      2.67 o 
   3   6   5      409.70      392.60      5.66 o 
   4   6   5       28.08       30.02      0.84 o 
   5   6   5        5.88        6.18      0.57 o 
   6   6   5        1.41       -0.29      0.61 o 
   7   6   5        2.73        2.85      0.80 o 
   8   6   5        8.86        4.61      1.27 o 
   9   6   5       49.37       53.47      2.72 o 
  10   6   5        7.42        3.31      1.49 o 
  -9   7   5        0.04        2.00      1.60 o 
  -8   7   5       12.36       12.05      1.80 o 
  -7   7   5        8.08        5.48      2.21 o 
  -6   7   5       77.19       69.60      2.95 o 
  -5   7   5      333.45      323.79      5.90 o 
  -4   7   5      464.31      449.90      6.36 o 
  -3   7   5      119.62      113.31      2.05 o 
  -2   7   5        0.38        3.00      0.58 o 
  -1   7   5        4.34        3.55      0.41 o 
   0   7   5       23.42       28.50      1.31 o 
   1   7   5        1.50       -0.70      1.52 o 
   2   7   5      104.45      118.76      3.87 o 
   3   7   5        5.14        4.16      0.72 o 
   4   7   5        1.79       -0.99      1.16 o 
   5   7   5       16.66       20.04      0.78 o 
   6   7   5       68.92       63.34      1.61 o 
   7   7   5        6.74        4.95      1.07 o 
   8   7   5        6.17        4.75      1.36 o 
   9   7   5        0.64       -0.18      1.14 o 
  -8   8   5        0.52       -0.69      1.33 o 
  -7   8   5        2.83        1.76      1.32 o 
  -6   8   5        8.39        9.96      1.54 o 
  -5   8   5       61.19       63.56      2.05 o 
  -4   8   5       50.41       63.46      4.16 o 
  -3   8   5      104.02       96.31      1.99 o 
  -2   8   5       86.15      104.47      1.91 o 
  -1   8   5       36.39       37.02      1.29 o 
   0   8   5       96.75       95.69      2.44 o 
   1   8   5        9.36        9.31      1.85 o 
   2   8   5      183.89      185.59      8.46 o 
   3   8   5     1022.50      989.02     19.68 o 
   4   8   5      995.08      963.34     17.90 o 
   5   8   5      318.50      314.72      6.21 o 
   6   8   5       91.44       88.23      2.44 o 
   7   8   5        3.80        4.58      0.88 o 
   8   8   5        1.82        0.00      1.04 o 
   9   8   5        0.24        1.20      1.23 o 
  -7   9   5        5.57        6.84      1.55 o 
  -6   9   5        1.82       -1.11      1.09 o 
  -5   9   5      105.33      102.51      2.93 o 
  -4   9   5      126.12      125.72      2.52 o 
  -3   9   5       64.02       55.83      1.77 o 
  -2   9   5        5.09        6.17      0.69 o 
  -1   9   5       12.03       10.80      1.24 o 
   0   9   5       39.24       33.21      2.94 o 
   1   9   5       27.05       31.92      3.17 o 
   2   9   5        3.51        3.97      1.92 o 
   3   9   5       23.42       28.75      3.24 o 
   4   9   5      216.84      206.47      5.75 o 
   5   9   5      120.01      112.66      2.62 o 
   6   9   5        0.42        1.48      0.79 o 
   7   9   5        3.64        1.09      0.84 o 
   8   9   5        0.73        0.25      0.94 o 
  -7  10   5        0.54        0.08      1.36 o 
  -6  10   5        6.92        6.16      1.35 o 
  -5  10   5        0.20       -0.59      0.98 o 
  -4  10   5        2.84        0.79      0.59 o 
  -3  10   5       25.50       22.00      1.20 o 
  -2  10   5      314.81      271.83      4.64 o 
  -1  10   5        0.72        1.05      0.70 o 
   0  10   5       11.71       12.43      2.22 o 
   1  10   5        7.76        5.56      1.90 o 
   2  10   5       67.25       70.57      4.94 o 
   3  10   5        3.12        4.59      2.07 o 
   4  10   5        1.97        1.15      1.21 o 
   5  10   5        0.05        0.08      0.59 o 
   6  10   5        1.77        1.13      0.81 o 
   7  10   5        1.21       -0.33      0.97 o 
  -6  11   5        2.74        2.71      1.24 o 
  -5  11   5        0.65       -0.58      0.90 o 
  -4  11   5        0.76        0.83      0.81 o 
  -3  11   5       30.93       28.06      1.49 o 
  -2  11   5       95.61       85.07      2.16 o 
  -1  11   5       49.70       48.85      2.17 o 
   1  11   5       28.63       28.87      3.32 o 
   2  11   5       14.46       22.93      2.97 o 
   4  11   5        7.61        5.26      1.09 o 
   5  11   5       50.60       52.10      1.68 o 
   6  11   5        0.16       -0.15      0.73 o 
  -4  12   5        0.91        0.56      0.99 o 
  -3  12   5        0.01        1.03      0.75 o 
  -2  12   5       25.61       21.92      1.14 o 
  -1  12   5        8.75        5.50      1.01 o 
  -1  -8   6        1.43        2.04      1.54 o 
   0  -8   6        2.14        1.59      1.51 o 
   1  -8   6        0.86       -0.54      1.41 o 
   2  -8   6        8.46        2.69      1.58 o 
   3  -8   6        8.96       11.42      1.88 o 
   4  -8   6       18.32       21.43      2.24 o 
   5  -8   6        5.15        4.84      1.81 o 
  -3  -7   6       13.37       13.02      1.49 o 
  -2  -7   6        0.09       -1.19      1.15 o 
  -1  -7   6        9.16       10.15      1.73 o 
   0  -7   6        0.00        1.17      1.59 o 
   1  -7   6       13.18       13.96      1.80 o 
   2  -7   6        0.01       -1.30      1.27 o 
   3  -7   6        2.12        0.37      2.02 o 
   4  -7   6        4.12        7.02      1.93 o 
   5  -7   6        7.09       10.14      1.87 o 
   6  -7   6        6.60        7.71      1.82 o 
   7  -7   6       10.69       13.09      2.09 o 
  -5  -6   6       22.54       27.23      2.52 o 
  -4  -6   6       47.01       55.51      3.12 o 
  -3  -6   6       12.29       12.11      1.63 o 
  -2  -6   6       11.25       15.67      1.89 o 
  -1  -6   6       42.71       45.62      2.62 o 
   0  -6   6        5.69        4.94      1.48 o 
   1  -6   6       56.47       53.88      2.81 o 
   2  -6   6       24.69       24.53      2.03 o 
   3  -6   6       21.07       21.62      1.99 o 
   4  -6   6       22.93       21.42      2.05 o 
   5  -6   6        0.02        0.21      1.37 o 
   6  -6   6        4.96        3.77      1.55 o 
   7  -6   6        1.89        0.72      1.50 o 
   8  -6   6        0.12        0.01      2.06 o 
  -6  -5   6       15.70       20.34      2.07 o 
  -5  -5   6       44.33       41.36      2.43 o 
  -4  -5   6       63.41       63.60      3.26 o 
  -3  -5   6        0.27       -0.30      1.21 o 
  -2  -5   6       14.01       11.21      1.43 o 
  -1  -5   6       16.19        7.94      1.29 o 
   0  -5   6       16.22       12.67      1.39 o 
   1  -5   6       41.71       37.22      1.95 o 
   2  -5   6       18.08       22.37      1.66 o 
   3  -5   6      145.92      131.26      3.71 o 
   4  -5   6      115.93      124.27      3.66 o 
   5  -5   6       25.66       27.69      1.88 o 
   6  -5   6       44.11       41.74      2.25 o 
   7  -5   6       46.18       54.85      2.72 o 
   8  -5   6        0.50        0.76      1.54 o 
   9  -5   6        8.01        4.19      3.62 o 
  -6  -4   6        7.48        4.86      1.67 o 
  -5  -4   6       87.18       84.17      3.20 o 
  -4  -4   6       37.47       43.01      2.10 o 
  -3  -4   6       81.02       87.39      3.09 o 
  -2  -4   6       32.65       35.21      2.38 o 
  -1  -4   6        6.68        7.19      1.73 o 
   0  -4   6       59.29       53.65      1.73 o 
   1  -4   6        4.80        5.32      0.74 o 
   2  -4   6        0.02        4.01      0.76 o 
   3  -4   6       30.82       30.09      1.41 o 
   4  -4   6      316.70      321.55      6.77 o 
   5  -4   6       47.97       57.45      2.14 o 
   6  -4   6       13.50        9.56      1.16 o 
   7  -4   6       20.27       18.77      1.80 o 
   8  -4   6        9.13        6.10      1.72 o 
   9  -4   6        4.36        7.16      2.46 o 
  10  -4   6        4.15        6.42      2.54 o 
  -7  -3   6        0.22        4.49      3.12 o 
  -6  -3   6        5.85        6.64      1.49 o 
  -5  -3   6        0.33       -1.45      1.00 o 
  -4  -3   6      308.57      325.42      6.38 o 
  -3  -3   6       34.59       33.27      2.03 o 
  -2  -3   6      231.76      219.94      3.74 o 
  -1  -3   6       57.23       56.72      1.46 o 
   0  -3   6        4.87        6.49      0.65 o 
   1  -3   6       12.92       13.28      0.80 o 
   2  -3   6       37.82       37.47      1.25 o 
   3  -3   6      340.99      345.61      4.85 o 
   4  -3   6      150.41      155.81      3.91 o 
   5  -3   6       30.88       30.03      1.46 o 
   6  -3   6       16.52       15.37      2.02 o 
   7  -3   6        1.30        1.42      0.99 o 
   8  -3   6       17.19       19.10      2.15 o 
   9  -3   6        0.11        0.16      1.93 o 
  10  -3   6        4.01        6.77      3.19 o 
  -8  -2   6        0.00       -1.12      2.82 o 
  -7  -2   6        0.60       -0.19      1.90 o 
  -6  -2   6       50.76       47.54      2.42 o 
  -5  -2   6        1.98       -1.21      0.91 o 
  -4  -2   6       22.04       30.86      1.80 o 
  -3  -2   6       20.89       27.34      1.19 o 
  -2  -2   6        6.07       19.03      1.29 o 
  -1  -2   6        3.10        2.02      0.55 o 
   0  -2   6      317.10      324.96      4.86 o 
   1  -2   6      188.36      175.20      3.08 o 
   2  -2   6      124.30      121.11      2.33 o 
   3  -2   6       46.04       50.77      1.72 o 
   4  -2   6      267.79      262.78      4.18 o 
   5  -2   6      108.30      108.08      2.31 o 
   6  -2   6      493.20      478.27      6.98 o 
   7  -2   6       24.66       30.41      1.42 o 
   8  -2   6        7.34        2.18      1.74 o 
   9  -2   6        0.47       -0.14      1.96 o 
  10  -2   6        8.09        3.34      2.29 o 
  -8  -1   6        3.90        4.26      2.30 o 
  -7  -1   6        1.50        4.08      2.03 o 
  -6  -1   6       13.00       12.92      1.54 o 
  -5  -1   6       75.73       74.00      2.76 o 
  -4  -1   6      124.88      112.90      2.55 o 
  -3  -1   6       77.87       79.66      2.18 o 
  -2  -1   6       48.74       52.94      1.37 o 
  -1  -1   6       26.55       29.20      0.98 o 
   0  -1   6        0.26       -0.64      0.43 o 
   1  -1   6        0.60       -0.76      0.50 o 
   2  -1   6     1844.22     1734.94     20.59 o 
   3  -1   6        5.96        5.99      0.73 o 
   4  -1   6       29.36       31.07      1.27 o 
   5  -1   6      432.15      418.65      6.10 o 
   6  -1   6      400.71      375.98      5.67 o 
   7  -1   6      604.48      559.04      8.03 o 
   8  -1   6       57.38       58.45      2.24 o 
   9  -1   6        1.98        3.31      2.01 o 
  10  -1   6        0.02       -1.85      4.32 o 
  11  -1   6        0.07       -1.55      2.21 o 
  -8   0   6        0.13        2.52      2.78 o 
  -7   0   6       84.21       87.89      4.80 o 
  -6   0   6       14.24       13.01      1.47 o 
  -5   0   6       12.64       15.31      1.15 o 
  -4   0   6      128.67      106.32      2.21 o 
  -3   0   6      114.91      119.39      2.58 o 
  -2   0   6      332.23      325.18      5.23 o 
  -1   0   6      124.99      126.44      2.52 o 
   0   0   6       23.82       21.90      0.81 o 
   1   0   6       45.40       33.14      0.99 o 
   2   0   6       13.81       46.87      1.57 o 
   3   0   6       96.10       86.26      1.67 o 
   4   0   6       11.25       13.68      0.74 o 
   5   0   6      136.87      132.18      2.21 o 
   6   0   6      373.68      384.94      5.76 o 
   7   0   6      126.49      124.33      3.93 o 
   8   0   6       81.49       84.22      2.62 o 
   9   0   6       30.90       29.60      1.74 o 
  10   0   6       88.67       95.93      5.29 o 
  11   0   6       12.20        8.51      2.70 o 
  -9   1   6        0.96       -0.56      3.43 o 
  -8   1   6        0.05        0.75      2.00 o 
  -7   1   6      277.39      281.77      9.43 o 
  -6   1   6        4.38        6.41      1.07 o 
  -5   1   6       16.68       15.21      1.10 o 
  -4   1   6       26.58       33.56      1.31 o 
  -3   1   6      389.35      387.90      4.98 o 
  -2   1   6      651.43      618.83      7.84 o 
  -1   1   6     1450.73     1410.30     18.08 o 
   0   1   6       65.78       66.59      1.97 o 
   1   1   6       20.94       26.54      0.95 o 
   2   1   6      117.30      465.83     17.88 o 
   3   1   6      578.98      500.25      6.37 o 
   4   1   6      243.16      210.65      3.11 o 
   5   1   6       40.57       37.66      1.11 o 
   6   1   6       68.38       63.42      1.49 o 
   7   1   6       63.61       57.99      1.59 o 
   8   1   6        3.37        3.11      1.08 o 
   9   1   6        9.55       11.30      1.56 o 
  10   1   6       73.06       68.16      3.66 o 
  11   1   6        0.09       -1.20      2.11 o 
  -9   2   6        1.75       -2.39      2.15 o 
  -8   2   6        0.44        0.16      1.89 o 
  -7   2   6       27.56       27.35      2.30 o 
  -6   2   6       17.06       18.79      1.62 o 
  -5   2   6        8.39        6.41      0.99 o 
  -4   2   6       31.21       35.42      1.28 o 
  -3   2   6       42.76       38.90      1.10 o 
  -2   2   6       28.78       41.21      0.99 o 
  -1   2   6      275.45      306.84      3.93 o 
   0   2   6     2136.75     2363.55     27.64 o 
   1   2   6     2472.13     2383.26     27.86 o 
   2   2   6      185.18      248.93      4.16 o 
   3   2   6       76.17       63.52      1.30 o 
   4   2   6        2.43        1.40      0.43 o 
   5   2   6       16.69       16.28      0.87 o 
   6   2   6      884.39      883.16     10.96 o 
   7   2   6       15.00       18.53      0.90 o 
   8   2   6       73.18       68.80      2.65 o 
   9   2   6        5.03        2.36      1.36 o 
  10   2   6       60.29       71.63      3.04 o 
  11   2   6        2.89       -3.42      2.60 o 
  -9   3   6       10.37       11.41      5.30 o 
  -8   3   6        2.06       -0.24      1.85 o 
  -7   3   6      171.26      145.10      4.09 o 
  -6   3   6       44.89       40.97      2.12 o 
  -5   3   6      216.94      220.75      3.73 o 
  -4   3   6       66.50       79.74      2.93 o 
  -3   3   6        6.53        6.59      0.53 o 
  -2   3   6       51.52       44.80      1.05 o 
  -1   3   6      193.78      178.79      2.36 o 
   0   3   6      513.41      601.02      7.00 o 
   1   3   6      346.81      341.40      4.17 o 
   2   3   6      230.87      256.28      3.24 o 
   3   3   6      369.89      369.52      4.81 o 
   4   3   6       52.74       49.99      1.13 o 
   5   3   6        1.71        1.39      0.47 o 
   6   3   6       10.36       12.05      0.75 o 
   7   3   6       77.56       77.94      1.94 o 
   8   3   6       40.32       44.52      2.14 o 
   9   3   6      102.06      103.39      3.35 o 
  10   3   6        3.80        6.30      1.58 o 
  11   3   6       10.06       12.41      1.97 o 
  -9   4   6       28.53       35.29      3.62 o 
  -8   4   6       12.26       14.96      2.09 o 
  -7   4   6       13.63       19.29      1.64 o 
  -6   4   6        2.14        0.42      0.98 o 
  -5   4   6       63.25       65.54      1.77 o 
  -4   4   6       63.78       80.33      3.58 o 
  -3   4   6      380.25      361.15      4.64 o 
  -2   4   6      127.97      126.95      1.98 o 
  -1   4   6      123.88      120.00      2.08 o 
   0   4   6       34.28       27.15      0.98 o 
   1   4   6     3254.15     3157.71     42.40 o 
   2   4   6       18.22        9.87      0.55 o 
   3   4   6     1243.61     1248.65     17.14 o 
   4   4   6      181.12      214.68      8.15 o 
   5   4   6       78.31       80.37      1.73 o 
   6   4   6       19.27       20.57      0.92 o 
   7   4   6        2.62        1.15      0.84 o 
   8   4   6        1.06        1.37      1.04 o 
   9   4   6       29.88       29.65      2.14 o 
  10   4   6       12.14        8.82      1.71 o 
  11   4   6        1.32        3.94      1.61 o 
  -9   5   6       14.51       26.23      4.59 o 
  -8   5   6       22.04       17.50      1.97 o 
  -7   5   6        4.03        0.34      1.23 o 
  -6   5   6       55.53       62.55      2.59 o 
  -5   5   6       24.74       24.68      1.39 o 
  -4   5   6      122.90      133.93      2.54 o 
  -3   5   6      127.83      116.47      2.19 o 
  -2   5   6      183.81      208.04      3.46 o 
  -1   5   6     1194.13     1100.27     14.08 o 
   0   5   6      498.53      518.77      6.85 o 
   1   5   6       27.24       18.05      0.69 o 
   2   5   6      510.23      543.71      7.12 o 
   3   5   6       13.99       18.34      0.67 o 
   4   5   6      664.30      608.86      7.58 o 
   5   5   6       50.86       48.64      1.23 o 
   6   5   6       44.72       47.48      1.31 o 
   7   5   6        2.77        0.31      0.79 o 
   8   5   6        9.40       12.50      1.92 o 
   9   5   6       78.70       85.82      3.42 o 
  10   5   6        0.10        0.17      1.32 o 
  -8   6   6       24.60       21.70      3.81 o 
  -7   6   6       54.79       61.90      2.95 o 
  -6   6   6       20.75       16.39      1.48 o 
  -5   6   6      646.30      645.43      9.77 o 
  -4   6   6     1589.17     1557.64     18.77 o 
  -3   6   6      532.72      517.39      7.69 o 
  -2   6   6      172.04      160.00      2.42 o 
  -1   6   6        1.13        1.63      0.39 o 
   0   6   6       44.13       53.16      1.10 o 
   1   6   6       85.31       79.17      1.35 o 
   2   6   6        0.54        2.94      0.95 o 
   3   6   6       36.74       39.56      0.92 o 
   4   6   6        6.89        5.78      0.99 o 
   5   6   6       14.21       15.15      0.73 o 
   6   6   6      114.25      107.04      2.25 o 
   7   6   6      170.84      185.08      3.78 o 
   8   6   6        6.26        2.24      1.19 o 
   9   6   6       29.95       35.73      2.75 o 
  10   6   6        2.65        2.00      1.42 o 
  -8   7   6        0.30       -0.26      1.35 o 
  -7   7   6        6.41        0.94      1.31 o 
  -6   7   6       35.12       38.48      3.57 o 
  -5   7   6       43.24       37.03      2.62 o 
  -4   7   6      785.28      769.77     10.36 o 
  -3   7   6      327.69      319.99      4.40 o 
  -2   7   6       11.66       61.56     11.64 o 
  -1   7   6      184.43      190.19      2.81 o 
   0   7   6      230.51      237.45      3.90 o 
   1   7   6      105.31       95.20      2.96 o 
   2   7   6      121.07      115.23      2.44 o 
   3   7   6       34.80       33.51      1.01 o 
   4   7   6      110.27      114.49      3.03 o 
   5   7   6       73.25       80.73      2.86 o 
   6   7   6        1.11        0.67      0.64 o 
   7   7   6       30.04       29.56      1.44 o 
   8   7   6        9.48        8.66      1.48 o 
   9   7   6        0.64        5.49      1.36 o 
  -8   8   6       22.68       27.73      2.37 o 
  -7   8   6        0.60        0.20      2.26 o 
  -6   8   6       40.31       42.53      2.41 o 
  -5   8   6        8.49        8.56      1.31 o 
  -4   8   6       14.32       16.45      1.76 o 
  -3   8   6      276.85      259.42      4.21 o 
  -2   8   6      170.10      169.52      2.65 o 
  -1   8   6       46.12       39.30      1.27 o 
   0   8   6        0.14       -0.48      0.46 o 
   1   8   6       22.33       21.43      1.14 o 
   2   8   6       90.88       93.51      2.53 o 
   3   8   6      457.85      430.07      9.12 o 
   4   8   6       86.25       76.46      2.24 o 
   5   8   6       27.24       26.49      1.29 o 
   6   8   6       19.21       17.11      1.31 o 
   7   8   6       76.16       84.92      2.49 o 
   8   8   6        0.22       -1.57      1.05 o 
   9   8   6        2.13        3.93      1.60 o 
  -7   9   6        5.36        7.10      1.59 o 
  -6   9   6       20.13       18.68      1.74 o 
  -5   9   6       20.96       19.11      1.66 o 
  -4   9   6       14.27       14.77      1.18 o 
  -3   9   6        1.56        0.85      0.55 o 
  -2   9   6       28.42       21.60      1.09 o 
  -1   9   6       45.98       44.06      1.20 o 
   0   9   6       26.71       25.13      1.27 o 
   1   9   6        0.01       -1.27      1.40 o 
   2   9   6        7.64        7.14      2.15 o 
   3   9   6      109.98      110.28      2.94 o 
   4   9   6      191.81      206.35      3.91 o 
   5   9   6        1.17       -0.66      0.65 o 
   6   9   6        3.12        0.46      0.79 o 
   7   9   6       15.38       19.01      1.35 o 
   8   9   6        0.48        1.59      0.96 o 
  -6  10   6        0.36        0.37      1.36 o 
  -5  10   6        0.91       -1.45      0.96 o 
  -4  10   6       19.00       19.62      1.13 o 
  -3  10   6        7.45        7.08      0.89 o 
  -2  10   6        5.49        4.85      0.76 o 
  -1  10   6       84.80       70.91      2.06 o 
   0  10   6        0.38       -1.22      1.48 o 
   1  10   6        0.80       -0.85      1.80 o 
   4  10   6       27.01       26.51      1.62 o 
   5  10   6       22.93       22.78      1.12 o 
   6  10   6       10.20        9.37      1.01 o 
   7  10   6        3.74        4.09      1.12 o 
  -5  11   6       51.79       52.43      2.42 o 
  -4  11   6        0.33       -0.97      0.91 o 
  -3  11   6        2.47        1.46      0.76 o 
  -2  11   6        4.40        6.87      0.81 o 
  -1  11   6       63.95       52.88      2.32 o 
   0  11   6       66.79       92.36      5.64 o 
   1  11   6        0.07       -0.32      1.65 o 
   4  11   6        5.42        6.06      1.45 o 
   5  11   6        2.36        1.02      0.66 o 
   6  11   6        0.28       -1.05      0.70 o 
  -4  12   6        0.42        0.68      1.03 o 
  -3  12   6        5.69        7.58      0.94 o 
  -2  12   6       22.98       22.56      1.34 o 
  -1  12   6        7.69        6.29      1.05 o 
  -1  -7   7       10.08       10.25      1.94 o 
   0  -7   7        0.06       -0.14      1.44 o 
   1  -7   7       53.40       55.38      3.09 o 
   2  -7   7        3.94        2.06      1.54 o 
   3  -7   7        0.07        0.49      1.47 o 
   4  -7   7        1.20        0.80      1.58 o 
   5  -7   7        0.12       -2.00      1.45 o 
  -3  -6   7        3.67        1.22      1.69 o 
  -2  -6   7        5.01        4.65      1.60 o 
  -1  -6   7       13.32       12.61      1.90 o 
   0  -6   7        5.94        4.38      1.48 o 
   1  -6   7        0.05       -1.06      1.26 o 
   2  -6   7       24.46       26.59      2.24 o 
   3  -6   7       21.69       17.79      2.04 o 
   4  -6   7        4.47        5.61      1.66 o 
   5  -6   7        0.49       -0.17      1.47 o 
   6  -6   7        1.85        3.67      1.68 o 
   7  -6   7        7.53       13.80      3.27 o 
  -4  -5   7       35.40       44.92      2.56 o 
  -3  -5   7        0.35       -1.10      1.43 o 
  -2  -5   7        0.56       -0.27      1.34 o 
  -1  -5   7        1.54        0.06      1.43 o 
   0  -5   7        4.62        4.03      1.28 o 
   1  -5   7       20.49       23.65      1.79 o 
   2  -5   7        0.00       -1.42      1.02 o 
   3  -5   7        6.08        3.63      1.32 o 
   4  -5   7       16.84       18.91      1.75 o 
   5  -5   7       74.99       74.24      3.01 o 
   6  -5   7        5.98        5.94      1.53 o 
   7  -5   7        5.31        4.92      1.77 o 
   8  -5   7        0.44       -1.17      3.29 o 
  -5  -4   7       29.63       25.23      2.08 o 
  -4  -4   7       33.02       27.51      2.11 o 
  -3  -4   7        4.18        1.71      1.28 o 
  -2  -4   7       18.00       20.29      2.38 o 
  -1  -4   7        2.80        2.45      1.26 o 
   0  -4   7      156.31      174.51      4.46 o 
   1  -4   7       24.51       19.95      1.68 o 
   2  -4   7        2.44        0.08      1.17 o 
   3  -4   7      108.04      104.88      3.40 o 
   4  -4   7      175.36      174.85      4.61 o 
   5  -4   7       38.05       35.12      2.14 o 
   6  -4   7       40.81       50.03      2.83 o 
   7  -4   7        7.39        8.21      1.83 o 
   8  -4   7        8.80        8.79      2.51 o 
   9  -4   7        3.97        3.12      2.37 o 
  -6  -3   7       14.08       18.89      4.09 o 
  -5  -3   7        9.43        9.71      1.42 o 
  -4  -3   7       72.45       80.22      2.84 o 
  -3  -3   7      217.10      195.46      5.00 o 
  -2  -3   7       14.34       13.99      1.63 o 
  -1  -3   7       75.69       71.76      2.73 o 
   0  -3   7      167.39      180.95      4.44 o 
   1  -3   7       36.19       34.62      1.46 o 
   2  -3   7       32.56       50.55      2.89 o 
   3  -3   7       81.87       70.91      2.13 o 
   4  -3   7       50.39       66.54      2.69 o 
   5  -3   7        0.02       -1.58      1.09 o 
   6  -3   7       13.62       13.39      1.30 o 
   7  -3   7       47.55       52.57      3.04 o 
   8  -3   7        0.01        1.21      2.02 o 
   9  -3   7        0.45        0.95      2.13 o 
  -7  -2   7        0.84        1.25      2.09 o 
  -6  -2   7        4.21        3.73      2.08 o 
  -5  -2   7       24.74       24.82      1.71 o 
  -4  -2   7        0.76       -0.34      1.14 o 
  -3  -2   7       14.10        5.26      1.46 o 
  -2  -2   7      331.56      317.12      5.45 o 
  -1  -2   7        9.77        9.95      1.04 o 
   0  -2   7        6.76        8.48      0.81 o 
   1  -2   7        4.32        2.96      0.51 o 
   2  -2   7      167.37      143.19      4.24 o 
   3  -2   7        0.05       -1.10      0.74 o 
   4  -2   7      714.46      658.41      9.90 o 
   5  -2   7       31.99       22.37      1.43 o 
   6  -2   7       97.73       92.21      2.34 o 
   7  -2   7       28.33       40.79      2.24 o 
   8  -2   7       97.59      108.12      4.02 o 
   9  -2   7        2.12        2.16      2.13 o 
  10  -2   7        1.60        0.49      2.21 o 
  -7  -1   7       13.92       26.31      3.10 o 
  -6  -1   7        2.66        1.83      1.95 o 
  -5  -1   7       37.29       37.95      1.93 o 
  -4  -1   7      109.41      114.66      2.89 o 
  -3  -1   7       49.41       40.78      1.65 o 
  -2  -1   7      495.06      497.72      7.77 o 
  -1  -1   7        9.63       12.14      0.95 o 
   0  -1   7        1.44       -0.22      0.58 o 
   1  -1   7      121.96      120.80      2.55 o 
   2  -1   7       12.29       13.77      0.94 o 
   3  -1   7      144.97      130.30      2.76 o 
   4  -1   7       67.99      104.26      5.47 o 
   5  -1   7      172.73      166.76      3.39 o 
   6  -1   7      206.49      192.41      3.54 o 
   7  -1   7       23.57       27.52      1.54 o 
   8  -1   7       12.64        8.28      1.71 o 
   9  -1   7       43.65       41.63      4.41 o 
  10  -1   7        0.37       -0.77      2.23 o 
  -8   0   7        1.23        1.81      2.39 o 
  -7   0   7        7.21        5.54      2.36 o 
  -6   0   7       33.45       27.26      2.96 o 
  -5   0   7       43.70       47.87      2.34 o 
  -4   0   7       55.63       51.71      1.62 o 
  -3   0   7      222.61      202.24      3.85 o 
  -2   0   7      869.98      800.71     11.69 o 
  -1   0   7        7.35        4.33      0.71 o 
   0   0   7      505.65      521.24      7.85 o 
   1   0   7       17.18       15.08      0.92 o 
   2   0   7       65.83      108.09      3.19 o 
   3   0   7       70.17       65.62      1.51 o 
   4   0   7      271.56      244.78      3.66 o 
   5   0   7      141.47      120.87      2.71 o 
   6   0   7       19.10       12.01      1.11 o 
   7   0   7       10.28       12.73      1.35 o 
   8   0   7       12.98       15.12      1.40 o 
   9   0   7        0.47        0.66      2.09 o 
  10   0   7       27.60       25.93      4.65 o 
  11   0   7        6.29        4.06      2.48 o 
  -8   1   7        0.17        0.04      2.47 o 
  -7   1   7        4.50        7.62      2.39 o 
  -6   1   7        6.00        7.74      2.18 o 
  -5   1   7        2.38        3.42      1.10 o 
  -4   1   7        0.54        0.98      0.74 o 
  -3   1   7        0.18       -0.92      0.61 o 
  -2   1   7        3.18        4.52      0.63 o 
  -1   1   7        1.28        1.21      0.48 o 
   0   1   7        3.88        0.31      0.46 o 
   1   1   7     1169.14     1075.86     14.02 o 
   2   1   7        2.20      101.27      3.08 o 
   3   1   7       21.08       22.25      0.87 o 
   4   1   7      306.42      314.52      4.48 o 
   5   1   7      131.08      115.49      2.18 o 
   6   1   7      535.97      528.18      6.64 o 
   7   1   7      113.49      109.77      2.92 o 
   8   1   7        0.05       -0.69      0.85 o 
   9   1   7        0.24       -1.79      1.19 o 
  10   1   7        1.40        1.13      2.18 o 
  11   1   7        1.83        2.67      3.12 o 
  -8   2   7        0.87        0.96      2.25 o 
  -7   2   7       50.38       41.98      3.49 o 
  -6   2   7       48.57       40.59      2.68 o 
  -5   2   7      178.93      173.57      4.41 o 
  -4   2   7       56.87       55.02      1.90 o 
  -3   2   7       85.89       84.08      1.73 o 
  -2   2   7      170.06      199.78      2.92 o 
  -1   2   7       58.61       52.59      1.30 o 
   0   2   7      142.22      125.28      2.13 o 
   1   2   7        3.91        3.54      0.46 o 
   2   2   7       91.83       94.91      1.74 o 
   3   2   7      104.54       91.57      1.72 o 
   4   2   7       41.10       53.78      3.27 o 
   5   2   7       18.04       15.46      0.83 o 
   6   2   7      105.63      107.06      2.00 o 
   7   2   7       15.62       16.23      1.29 o 
   8   2   7       45.82       48.13      2.31 o 
   9   2   7       29.25       35.85      2.63 o 
  10   2   7       11.29        7.11      1.75 o 
  11   2   7        6.94       14.95      3.79 o 
  -8   3   7        2.33        1.66      2.13 o 
  -7   3   7        5.12        5.09      1.67 o 
  -6   3   7       27.31       21.46      1.68 o 
  -5   3   7       24.58       19.32      2.06 o 
  -4   3   7       93.33       97.54      2.06 o 
  -3   3   7      542.53      515.89      6.42 o 
  -2   3   7      284.02      307.57      3.84 o 
  -1   3   7       49.78       50.99      1.26 o 
   0   3   7        0.01        0.76      0.39 o 
   1   3   7      105.87       97.93      1.64 o 
   2   3   7        2.66        3.99      0.42 o 
   3   3   7       31.39       30.97      0.97 o 
   4   3   7        7.66        6.75      0.59 o 
   5   3   7       41.42       39.39      1.15 o 
   6   3   7       93.70       88.56      1.80 o 
   7   3   7        2.27        1.85      1.00 o 
   8   3   7       31.10       31.50      1.88 o 
   9   3   7        0.01        1.85      2.05 o 
  10   3   7       31.66       27.78      2.30 o 
  11   3   7        0.16        1.84      2.36 o 
  -8   4   7        2.54        3.51      2.28 o 
  -7   4   7       38.68       33.77      2.18 o 
  -6   4   7        7.83       10.09      1.36 o 
  -5   4   7       31.48       28.58      1.77 o 
  -4   4   7      129.04      129.85      4.55 o 
  -3   4   7       97.46       88.77      1.87 o 
  -2   4   7       91.07       85.96      1.63 o 
  -1   4   7     1559.72     1422.87     16.08 o 
   0   4   7        8.06       11.56      0.68 o 
   1   4   7       34.54       50.11      1.26 o 
   2   4   7        0.03        1.92      0.81 o 
   3   4   7       81.22       71.46      1.69 o 
   4   4   7      396.99      360.81      6.56 o 
   5   4   7      205.57      199.90      3.08 o 
   6   4   7        8.17        7.87      0.74 o 
   7   4   7       22.56       23.26      1.37 o 
   8   4   7       34.47       33.76      2.12 o 
   9   4   7        0.31        3.34      1.32 o 
  10   4   7       22.67       18.36      2.05 o 
  -8   5   7        4.19        3.05      2.07 o 
  -7   5   7       15.28       20.60      2.38 o 
  -6   5   7        8.04       11.31      1.95 o 
  -5   5   7        2.95        0.81      1.02 o 
  -4   5   7      159.45      165.71      3.94 o 
  -3   5   7      206.80      209.55      3.50 o 
  -2   5   7       40.69       41.64      1.19 o 
  -1   5   7       98.66      102.91      2.11 o 
   0   5   7       10.74       11.40      0.66 o 
   1   5   7      583.55      583.05      7.75 o 
   2   5   7      340.81      346.34      4.83 o 
   3   5   7      103.34      102.76      1.88 o 
   4   5   7        0.16        0.92      0.50 o 
   5   5   7       60.81       57.69      1.41 o 
   6   5   7      108.23      115.35      2.79 o 
   7   5   7        1.89        0.88      0.78 o 
   8   5   7        0.03       -0.79      1.05 o 
   9   5   7       61.41       72.39      3.27 o 
  10   5   7        0.74        0.53      1.32 o 
  -8   6   7        0.02        0.05      1.41 o 
  -7   6   7       12.77       13.89      1.78 o 
  -6   6   7       99.86       98.57      3.80 o 
  -5   6   7      377.37      375.82      7.64 o 
  -4   6   7      245.18      220.73      4.02 o 
  -3   6   7      322.85      301.97      5.01 o 
  -2   6   7      476.27      468.82      5.75 o 
  -1   6   7      523.28      505.41      6.86 o 
   0   6   7      298.39      304.05      4.30 o 
   1   6   7        1.43        2.67      0.44 o 
   2   6   7       33.20       52.45      1.66 o 
   3   6   7       41.98       46.43      1.14 o 
   4   6   7      175.57      180.74      2.70 o 
   5   6   7      310.24      316.29      4.36 o 
   6   6   7       32.16       32.60      1.30 o 
   7   6   7       22.62       20.29      1.28 o 
   8   6   7        0.23       -0.45      1.32 o 
   9   6   7       16.96       17.41      1.80 o 
  10   6   7       10.17        8.27      1.66 o 
  -8   7   7       64.76       77.43      3.61 o 
  -7   7   7        0.23        0.72      1.33 o 
  -6   7   7        6.46        6.56      1.47 o 
  -5   7   7        2.36        1.59      1.09 o 
  -4   7   7      222.56      209.52      4.18 o 
  -3   7   7        4.72        4.62      0.80 o 
  -2   7   7      280.57      270.16      3.79 o 
  -1   7   7       14.83       13.62      0.67 o 
   0   7   7        0.03        1.12      0.41 o 
   1   7   7      170.30      177.41      2.62 o 
   2   7   7      351.33      320.72      4.72 o 
   3   7   7      105.36       99.93      1.63 o 
   4   7   7       88.67      125.29      4.26 o 
   5   7   7      211.73      213.93      3.54 o 
   6   7   7       56.24       57.97      1.88 o 
   7   7   7      265.61      268.83      5.01 o 
   8   7   7       48.63       46.26      2.44 o 
   9   7   7        0.34       -0.46      1.18 o 
  -7   8   7        0.08        1.06      1.37 o 
  -6   8   7       24.11       20.58      1.88 o 
  -5   8   7       38.11       38.01      2.21 o 
  -4   8   7       15.28       18.92      1.43 o 
  -3   8   7      164.95      155.88      2.94 o 
  -2   8   7       19.15       21.04      1.52 o 
  -1   8   7      136.38      122.59      2.20 o 
   0   8   7      119.09      121.90      2.61 o 
   1   8   7        0.42        0.14      0.44 o 
   2   8   7        4.03       20.86      1.62 o 
   3   8   7      223.79      207.93      3.67 o 
   4   8   7      214.09      209.93      4.12 o 
   5   8   7      150.16      145.13      3.25 o 
   6   8   7      433.65      442.04      7.28 o 
   7   8   7       73.29       73.28      2.14 o 
   8   8   7       19.53       23.46      1.75 o 
   9   8   7        5.20        4.61      1.33 o 
  -7   9   7       55.84       54.98      2.97 o 
  -6   9   7        2.97        2.28      1.27 o 
  -5   9   7       31.90       30.23      1.97 o 
  -4   9   7       32.03       30.86      1.44 o 
  -3   9   7        1.33        0.34      0.59 o 
  -2   9   7      145.57      138.34      2.48 o 
  -1   9   7      113.77       94.56      2.28 o 
   0   9   7       55.75       54.77      1.49 o 
   1   9   7        0.36        2.02      0.68 o 
   2   9   7        3.54        4.42      0.90 o 
   3   9   7       59.75       55.30      2.30 o 
   4   9   7      105.45      101.21      3.20 o 
   5   9   7       19.36       15.41      1.01 o 
   6   9   7       17.93       19.58      1.25 o 
   7   9   7       15.15       16.70      1.77 o 
   8   9   7        0.37        1.02      0.97 o 
  -6  10   7       14.06       15.24      1.72 o 
  -5  10   7       73.58       79.58      3.04 o 
  -4  10   7       29.40       29.36      1.39 o 
  -3  10   7        3.64        2.29      0.63 o 
  -2  10   7        5.51       17.34      2.32 o 
  -1  10   7       74.79       57.46      1.70 o 
   0  10   7      491.37      488.83     10.29 o 
   1  10   7       24.29       23.55      1.33 o 
   2  10   7        5.89        6.04      1.25 o 
   3  10   7       35.29       36.42      1.75 o 
   4  10   7        1.36        2.18      0.71 o 
   5  10   7       30.49       30.74      1.32 o 
   6  10   7        0.31       -1.05      0.70 o 
   7  10   7        0.65        1.31      1.04 o 
  -5  11   7       13.35       10.68      1.83 o 
  -4  11   7        3.83        3.06      1.32 o 
  -3  11   7       16.02       16.45      1.09 o 
  -2  11   7       13.95       17.24      1.07 o 
  -1  11   7        1.82        0.57      0.58 o 
   0  11   7        5.95        9.33      0.95 o 
   4  11   7        5.53        5.96      1.01 o 
   5  11   7        0.68        0.23      0.63 o 
   6  11   7        0.07       -0.30      0.71 o 
  -3  12   7       11.24        8.93      0.99 o 
  -2  12   7        4.23        3.57      0.74 o 
  -1  12   7        2.75        1.46      0.61 o 
  -1  -6   8        0.18       -1.16      1.46 o 
   0  -6   8        1.76        0.15      1.45 o 
   1  -6   8        2.00        1.17      1.45 o 
   2  -6   8        0.15        1.43      2.34 o 
   3  -6   8        0.03       -2.36      1.57 o 
   4  -6   8        1.23        6.79      1.96 o 
   5  -6   8        0.04        2.36      2.22 o 
  -3  -5   8        1.81        1.93      1.53 o 
  -2  -5   8        4.40        4.08      1.66 o 
  -1  -5   8       43.20       40.19      2.70 o 
   0  -5   8       12.17       14.61      1.95 o 
   1  -5   8        0.05       -0.33      1.80 o 
   2  -5   8        3.06        2.42      1.46 o 
   3  -5   8       10.04        9.45      2.07 o 
   4  -5   8        0.97        0.97      1.33 o 
   5  -5   8       50.20       46.51      2.99 o 
   6  -5   8        1.37        0.25      3.39 o 
   7  -5   8        4.55        5.27      3.74 o 
  -4  -4   8       17.04       14.14      2.30 o 
  -3  -4   8       12.25       10.32      1.88 o 
  -2  -4   8        3.07        0.73      1.28 o 
  -1  -4   8        8.44        5.40      1.40 o 
   0  -4   8       19.56       21.25      1.83 o 
   1  -4   8       35.91       42.95      2.29 o 
   2  -4   8       39.83       39.96      2.23 o 
   3  -4   8       14.43       13.44      1.72 o 
   4  -4   8        4.62        4.04      1.44 o 
   5  -4   8        2.87        5.13      1.47 o 
   6  -4   8       22.93       25.05      2.49 o 
   7  -4   8       13.34       16.92      2.84 o 
   8  -4   8        1.76       -2.65      2.12 o 
  -5  -3   8       21.83       14.05      3.87 o 
  -4  -3   8       14.10       10.43      2.01 o 
  -3  -3   8        9.27       11.15      1.66 o 
  -2  -3   8        0.50       -1.44      1.33 o 
  -1  -3   8        4.71        8.63      1.58 o 
   0  -3   8       36.39       52.61      2.50 o 
   1  -3   8        4.88        2.72      1.26 o 
   2  -3   8       45.77       38.73      2.13 o 
   3  -3   8       23.08       23.24      1.87 o 
   4  -3   8       79.36      105.76      4.52 o 
   5  -3   8       22.93       19.89      1.77 o 
   6  -3   8        2.33        3.33      3.09 o 
   7  -3   8       11.62       24.97      3.14 o 
   8  -3   8       56.94       72.15      4.61 o 
   9  -3   8        3.10        3.36      2.41 o 
  -6  -2   8        0.14        1.16      2.18 o 
  -5  -2   8        0.16       -1.47      1.83 o 
  -4  -2   8        0.29       -1.25      1.26 o 
  -3  -2   8        0.08        0.68      1.27 o 
  -2  -2   8       10.03       12.97      1.66 o 
  -1  -2   8       79.14       84.99      3.11 o 
   0  -2   8        0.21        1.57      1.48 o 
   1  -2   8       15.05       16.87      1.37 o 
   2  -2   8        8.80       55.98      2.85 o 
   3  -2   8       70.00       67.79      2.18 o 
   4  -2   8      153.81      145.87      3.23 o 
   5  -2   8       13.81       10.11      1.42 o 
   6  -2   8       15.74       17.94      1.67 o 
   7  -2   8        7.04        4.01      1.95 o 
   8  -2   8       25.74       21.88      2.98 o 
   9  -2   8       60.77       69.65      7.10 o 
  -6  -1   8        0.00       -1.49      2.72 o 
  -5  -1   8       21.20       22.43      2.92 o 
  -4  -1   8        3.33        0.75      1.54 o 
  -3  -1   8        0.53       -1.47      0.98 o 
  -2  -1   8       32.95       45.34      1.82 o 
  -1  -1   8       26.77       24.27      1.62 o 
   0  -1   8      285.31      294.43      5.06 o 
   1  -1   8        5.01        4.75      0.86 o 
   2  -1   8        0.26       81.66      9.10 o 
   3  -1   8       55.06       46.80      1.71 o 
   4  -1   8       44.97       48.82      1.85 o 
   5  -1   8       20.93       15.26      1.24 o 
   6  -1   8       24.21       22.90      1.55 o 
   7  -1   8       48.26       48.82      2.78 o 
   8  -1   8      191.81      171.96      5.43 o 
   9  -1   8       93.36       96.43      5.35 o 
  10  -1   8       11.91       10.45      2.72 o 
  -7   0   8        7.93       11.48      2.82 o 
  -6   0   8       25.87       19.31      2.98 o 
  -5   0   8       21.50       22.87      2.96 o 
  -4   0   8       73.06       72.13      3.50 o 
  -3   0   8      100.40       93.53      2.45 o 
  -2   0   8       74.48       81.00      2.23 o 
  -1   0   8       48.89       50.12      1.75 o 
   0   0   8      113.11      124.43      2.73 o 
   1   0   8      339.95      308.46      5.16 o 
   2   0   8       20.31      145.46      9.65 o 
   3   0   8       26.72       27.57      1.29 o 
   4   0   8       24.89       18.21      1.23 o 
   5   0   8       36.26       33.87      1.49 o 
   6   0   8      125.63      119.39      3.17 o 
   7   0   8       31.15       22.29      2.04 o 
   8   0   8      116.73      114.41      4.45 o 
   9   0   8       14.29        8.14      2.59 o 
  10   0   8        7.34        8.29      2.55 o 
  -7   1   8        0.21        3.14      3.06 o 
  -6   1   8        8.06        9.39      2.46 o 
  -5   1   8       62.54       65.17      4.03 o 
  -4   1   8        3.70        5.25      1.06 o 
  -3   1   8        6.17        6.25      0.84 o 
  -2   1   8      120.15      118.97      2.69 o 
  -1   1   8      132.80      109.66      3.07 o 
   0   1   8       49.73       58.48      2.10 o 
   1   1   8      488.79      469.43      6.71 o 
   2   1   8       35.92       31.93      1.24 o 
   3   1   8      461.60      422.96      7.63 o 
   4   1   8      103.56      103.35      2.08 o 
   5   1   8      133.15      119.34      2.33 o 
   6   1   8      136.42      134.93      3.33 o 
   7   1   8        6.09        5.16      1.06 o 
   8   1   8      105.89      113.09      3.64 o 
   9   1   8        7.86        5.93      1.83 o 
  10   1   8       13.66       10.67      2.65 o 
  -7   2   8        3.75        4.54      2.30 o 
  -6   2   8        3.72        0.77      1.85 o 
  -5   2   8       27.26       28.95      1.88 o 
  -4   2   8      111.01      110.33      3.08 o 
  -3   2   8      426.36      404.39      6.08 o 
  -2   2   8      156.15      149.00      2.63 o 
  -1   2   8       11.08       11.50      0.76 o 
   0   2   8       23.43       33.50      1.12 o 
   1   2   8        3.80        2.25      0.56 o 
   2   2   8      309.76      316.50      4.42 o 
   3   2   8      157.44      153.79      2.57 o 
   4   2   8       10.76       13.28      0.81 o 
   5   2   8      104.41      106.30      2.13 o 
   6   2   8      109.79      110.76      2.91 o 
   7   2   8       38.51       31.98      1.89 o 
   8   2   8        0.33       -0.79      1.08 o 
   9   2   8        6.95        8.16      1.46 o 
  10   2   8        1.84       -2.07      3.52 o 
  -8   3   8       35.56       28.26      4.78 o 
  -7   3   8        3.13        5.96      2.41 o 
  -6   3   8       16.05       17.33      1.66 o 
  -5   3   8        4.03        4.76      1.17 o 
  -4   3   8       50.96       46.34      2.19 o 
  -3   3   8       63.71       61.23      2.10 o 
  -2   3   8      335.85      330.68      4.20 o 
  -1   3   8      457.19      410.27      5.88 o 
   0   3   8      127.97      132.23      2.27 o 
   1   3   8      180.23      177.35      2.77 o 
   2   3   8      304.01      335.79      6.42 o 
   3   3   8      348.87      319.42      4.46 o 
   4   3   8      254.83      227.35      3.43 o 
   5   3   8      244.83      260.93      3.92 o 
   6   3   8       43.98       48.57      2.49 o 
   7   3   8       11.59       14.04      1.42 o 
   8   3   8        5.60        5.26      1.27 o 
   9   3   8        0.38       -0.79      1.27 o 
  10   3   8        0.53       -1.42      1.26 o 
  -8   4   8        1.61        0.35      3.34 o 
  -7   4   8        1.91        1.05      2.04 o 
  -6   4   8       13.09        9.90      1.49 o 
  -5   4   8        0.01       -0.24      0.97 o 
  -4   4   8       15.57       15.14      2.14 o 
  -3   4   8       44.04       54.54      2.04 o 
  -2   4   8        7.88        7.44      0.66 o 
  -1   4   8      145.20      133.26      2.19 o 
   0   4   8        0.10        0.37      0.55 o 
   1   4   8      823.11      757.09     10.09 o 
   2   4   8        8.73       10.73      1.47 o 
   3   4   8        0.61        0.18      0.51 o 
   4   4   8      262.28      250.15      3.92 o 
   5   4   8        3.56        2.70      0.65 o 
   6   4   8      600.59      591.98      8.95 o 
   7   4   8       77.10       76.19      2.66 o 
   8   4   8       38.06       40.41      2.38 o 
   9   4   8        0.43        1.89      1.39 o 
  10   4   8        7.69        4.61      1.59 o 
  -7   5   8        3.71        3.05      2.11 o 
  -6   5   8        1.76        1.50      1.27 o 
  -5   5   8       45.11       49.74      2.26 o 
  -4   5   8       30.06       29.32      1.82 o 
  -3   5   8     1004.76      982.17     13.15 o 
  -2   5   8       79.45       97.67      2.03 o 
  -1   5   8      409.20      415.22      5.95 o 
   0   5   8        3.17        1.15      0.48 o 
   1   5   8       50.05       51.28      1.44 o 
   2   5   8        1.51        4.66      0.73 o 
   3   5   8      132.64      137.24      2.61 o 
   4   5   8      120.67      143.46      2.76 o 
   5   5   8       93.44       88.32      2.13 o 
   6   5   8       33.48       37.24      1.56 o 
   7   5   8       25.78       23.05      1.74 o 
   8   5   8        0.01       -0.27      1.14 o 
   9   5   8       49.40       56.36      4.26 o 
  10   5   8        0.49        1.29      1.34 o 
  -7   6   8        0.18        0.61      1.38 o 
  -6   6   8        3.51        3.36      1.37 o 
  -5   6   8        6.53        8.04      1.38 o 
  -4   6   8       27.59       30.69      2.03 o 
  -3   6   8        6.98        3.83      0.95 o 
  -2   6   8     1955.09     1872.33     22.32 o 
  -1   6   8       42.08       39.19      1.31 o 
   0   6   8      166.16      188.13      3.03 o 
   1   6   8      204.57      197.87      3.10 o 
   2   6   8       54.57      107.77      4.76 o 
   3   6   8       51.73       50.69      1.34 o 
   5   6   8      282.18      287.23      4.68 o 
   6   6   8        0.99       -0.09      0.75 o 
   7   6   8        4.16        5.20      1.24 o 
   8   6   8        0.09       -0.50      1.20 o 
   9   6   8        1.50        2.55      1.32 o 
  10   6   8        5.38        2.61      1.47 o 
  -7   7   8        1.16       -0.33      1.78 o 
  -6   7   8       51.21       55.88      2.87 o 
  -5   7   8        1.34        1.46      1.27 o 
  -4   7   8        2.48        1.26      1.07 o 
  -3   7   8       34.10       30.25      1.45 o 
  -2   7   8      277.50      279.02      4.27 o 
  -1   7   8      351.24      334.58      5.23 o 
   0   7   8      136.31      143.91      2.61 o 
   1   7   8        0.13       -0.64      0.43 o 
   2   7   8       12.81       43.80      2.72 o 
   3   7   8      126.80      128.81      2.34 o 
   5   7   8      211.35      206.45      3.55 o 
   6   7   8       17.96       15.61      1.16 o 
   7   7   8       77.72       78.20      2.64 o 
   8   7   8        3.10        2.94      1.28 o 
   9   7   8       26.35       28.24      3.16 o 
  -7   8   8        2.20        1.19      1.41 o 
  -6   8   8        0.78        0.00      1.25 o 
  -5   8   8        6.59        8.61      1.44 o 
  -4   8   8       37.42       36.67      2.13 o 
  -3   8   8      136.06      138.44      3.10 o 
  -2   8   8       15.47       16.45      0.88 o 
  -1   8   8      317.87      294.63      4.63 o 
   0   8   8        4.27        1.73      0.51 o 
   1   8   8       82.15       85.55      2.81 o 
   2   8   8       69.39       66.85      1.81 o 
   3   8   8        2.66        2.47      0.67 o 
   4   8   8      128.85      120.61      2.82 o 
   5   8   8      101.80      105.21      2.13 o 
   6   8   8       62.53       57.35      1.66 o 
   7   8   8        0.10       -1.36      0.90 o 
   8   8   8       30.73       34.15      2.10 o 
  -6   9   8       39.80       48.63      2.72 o 
  -5   9   8       77.21       78.38      3.11 o 
  -4   9   8       17.52       22.75      2.90 o 
  -3   9   8        0.01       -1.07      0.71 o 
  -2   9   8       10.30       28.57      2.80 o 
  -1   9   8       78.91       76.16      2.16 o 
   0   9   8       23.46       29.22      1.27 o 
   1   9   8       50.08       47.16      1.47 o 
   2   9   8       56.42       65.49      2.04 o 
   3   9   8       62.84       54.80      1.59 o 
   4   9   8       41.69       38.37      1.43 o 
   5   9   8       27.86       26.92      1.33 o 
   6   9   8        7.76       12.62      1.13 o 
   7   9   8        0.04       -0.77      0.79 o 
   8   9   8       15.50       15.30      1.46 o 
  -5  10   8        0.65       -0.15      1.20 o 
  -4  10   8        0.06        1.08      1.09 o 
  -3  10   8       18.17       20.81      1.16 o 
  -2  10   8       16.66       14.15      1.10 o 
  -1  10   8       51.95       43.93      1.62 o 
   0  10   8      179.00      175.22      4.60 o 
   1  10   8       38.23       29.45      1.17 o 
   2  10   8      139.33      129.02      3.15 o 
   3  10   8       26.99       29.30      1.13 o 
   4  10   8        2.76        3.11      0.66 o 
   5  10   8       47.45       55.22      1.79 o 
   6  10   8        3.96        2.58      0.95 o 
   7  10   8        0.01        0.26      1.04 o 
  -4  11   8       30.34       28.18      1.75 o 
  -3  11   8       25.33       27.50      1.76 o 
  -2  11   8        8.52        7.28      0.96 o 
  -1  11   8        3.57        2.95      0.71 o 
   0  11   8        6.93        8.25      0.75 o 
   1  11   8        1.97        3.48      1.00 o 
   2  11   8       36.69       35.21      1.74 o 
   3  11   8       38.11       33.99      2.35 o 
   4  11   8        6.59        5.52      0.66 o 
   5  11   8        0.66        0.79      0.91 o 
   6  11   8        0.01       -1.04      0.69 o 
  -2  12   8        4.81        5.02      1.22 o 
  -1  12   8       23.52       22.46      1.30 o 
   0  12   8        0.04        0.07      0.64 o 
  -1  -5   9        1.03       -0.07      3.14 o 
   0  -5   9        3.41        2.33      2.14 o 
   1  -5   9        3.08       -0.26      2.89 o 
   2  -5   9        9.70        9.47      2.49 o 
   3  -5   9       13.02       11.72      3.06 o 
   4  -5   9        0.43       -0.20      3.27 o 
   5  -5   9       42.96       53.40      6.26 o 
  -3  -4   9       23.62       34.64      5.44 o 
  -2  -4   9        2.61       -0.52      3.17 o 
  -1  -4   9        0.61       -0.25      1.83 o 
   0  -4   9        0.00       -0.04      1.55 o 
   1  -4   9       13.09       12.37      1.70 o 
   2  -4   9        1.95        0.57      1.33 o 
   3  -4   9       30.47       34.53      2.71 o 
   4  -4   9        2.59       -1.27      2.21 o 
   5  -4   9        1.38       -1.10      2.18 o 
   6  -4   9       52.58       54.70      6.69 o 
   7  -4   9        0.71        0.04      2.79 o 
  -4  -3   9        4.24        4.83      4.70 o 
  -3  -3   9        5.15        5.14      2.62 o 
  -2  -3   9       19.76       17.98      2.95 o 
  -1  -3   9       78.15       61.29      3.50 o 
   0  -3   9      102.14      105.75      3.72 o 
   1  -3   9       18.01       18.18      1.83 o 
   2  -3   9        8.17        8.58      1.56 o 
   3  -3   9        9.95        9.69      1.60 o 
   4  -3   9       18.57       17.65      2.17 o 
   5  -3   9       22.08       19.47      2.86 o 
   6  -3   9        3.18        3.21      2.21 o 
   7  -3   9        2.28        3.53      5.40 o 
   8  -3   9        3.92        2.32      2.35 o 
  -5  -2   9        5.94        7.02      2.55 o 
  -4  -2   9        0.39       -0.28      1.80 o 
  -3  -2   9        0.19       -1.13      2.74 o 
  -2  -2   9       28.76       30.12      3.31 o 
  -1  -2   9        6.25        3.87      1.52 o 
   0  -2   9      182.32      221.49      5.48 o 
   1  -2   9        2.09        0.32      1.22 o 
   2  -2   9        0.48        0.37      1.17 o 
   3  -2   9      121.83      130.17      4.79 o 
   4  -2   9       17.57       17.36      2.03 o 
   5  -2   9       16.50       21.16      2.73 o 
   6  -2   9       32.80       26.37      3.05 o 
   7  -2   9        0.00        0.44      2.67 o 
   8  -2   9        0.39       -0.21      2.27 o 
   9  -2   9        5.33        8.51      2.77 o 
  -5  -1   9        6.99        8.06      2.58 o 
  -4  -1   9        7.04        3.81      1.83 o 
  -3  -1   9        6.03        4.94      2.20 o 
  -2  -1   9        8.78        9.05      2.88 o 
  -1  -1   9       23.12       21.79      1.77 o 
   0  -1   9       70.61       69.20      2.75 o 
   1  -1   9      117.68      123.88      2.90 o 
   2  -1   9      131.51      111.20      2.69 o 
   3  -1   9        0.17       -0.08      0.83 o 
   4  -1   9        8.28       11.67      1.65 o 
   5  -1   9       13.97       17.81      5.69 o 
   6  -1   9       17.31       19.71      2.72 o 
   7  -1   9       12.35       10.64      2.08 o 
   8  -1   9       20.36       24.24      3.17 o 
   9  -1   9        0.07        2.36      2.41 o 
  -6   0   9       11.48       16.50      3.03 o 
  -5   0   9       20.96       24.00      3.12 o 
  -4   0   9        2.52        4.36      1.81 o 
  -3   0   9        0.04       -0.25      1.75 o 
  -2   0   9        3.40        3.82      1.88 o 
  -1   0   9       29.41       29.13      1.44 o 
   0   0   9       25.47       27.79      1.38 o 
   1   0   9        0.09       -0.99      0.72 o 
   2   0   9        2.13        5.31      1.55 o 
   3   0   9      195.94      189.23      3.74 o 
   4   0   9        3.03        5.65      1.02 o 
   5   0   9        4.21        4.62      1.21 o 
   6   0   9       13.22       13.99      1.33 o 
   7   0   9        0.26       -1.88      1.53 o 
   8   0   9       76.99       86.36      5.00 o 
   9   0   9       24.77       35.08      3.54 o 
  -6   1   9        0.35       -0.44      2.18 o 
  -5   1   9       16.15       18.79      5.42 o 
  -4   1   9        0.48        0.72      1.55 o 
  -3   1   9        3.82        3.58      1.14 o 
  -2   1   9        0.93        0.86      1.07 o 
  -1   1   9        0.03       -0.65      0.67 o 
   0   1   9       13.48        3.19      0.68 o 
   1   1   9       28.03       28.65      1.50 o 
   2   1   9       52.36       56.10      2.04 o 
   3   1   9      247.64      246.21      4.42 o 
   4   1   9       66.37       64.08      2.45 o 
   5   1   9        1.20       -1.36      0.91 o 
   6   1   9        3.39        2.39      1.06 o 
   7   1   9        2.44        2.95      1.30 o 
   8   1   9        0.05        2.11      1.30 o 
   9   1   9        0.05        3.96      2.25 o 
  10   1   9       35.64       42.77      5.19 o 
  -6   2   9        0.03        2.00      2.15 o 
  -5   2   9        0.01        2.02      2.60 o 
  -4   2   9        1.12       -1.27      0.85 o 
  -3   2   9      106.56       94.40      3.26 o 
  -2   2   9       26.70       22.01      1.61 o 
  -1   2   9      145.64      124.32      3.35 o 
   0   2   9       81.04       77.46      1.91 o 
   1   2   9       10.14       11.67      0.83 o 
   2   2   9        0.07       11.32      1.76 o 
   3   2   9      233.14      219.94      3.46 o 
   4   2   9       54.43       48.86      1.84 o 
   5   2   9        1.77        0.86      1.00 o 
   6   2   9       41.47       43.43      2.17 o 
   7   2   9       16.03       17.20      1.64 o 
   8   2   9       18.07       15.99      1.71 o 
   9   2   9        1.04        0.33      1.42 o 
  10   2   9        1.87       -0.10      2.94 o 
  -7   3   9       15.61       16.75      3.08 o 
  -6   3   9       57.11       65.99      4.46 o 
  -5   3   9        3.39        3.51      1.29 o 
  -4   3   9        0.06       -1.30      0.87 o 
  -3   3   9      198.10      193.26      4.78 o 
  -2   3   9       14.64       17.52      1.46 o 
  -1   3   9       69.16       69.09      2.42 o 
   0   3   9        0.52       -0.83      0.56 o 
   1   3   9      474.78      446.49      6.39 o 
   2   3   9       42.76       84.39      3.86 o 
   3   3   9        6.71        4.19      0.66 o 
   4   3   9        0.40        1.56      0.61 o 
   5   3   9       18.69       13.52      1.38 o 
   6   3   9       19.80       20.15      1.71 o 
   7   3   9        4.27        3.88      1.20 o 
   8   3   9        0.50       -0.78      1.21 o 
   9   3   9        1.93        3.97      1.83 o 
  10   3   9       19.90       22.01      2.24 o 
  -7   4   9       14.01       23.33      4.42 o 
  -6   4   9        7.27       10.13      1.91 o 
  -5   4   9       71.35       73.98      2.90 o 
  -4   4   9        0.38        0.89      0.92 o 
  -3   4   9       30.59       26.52      1.59 o 
  -2   4   9      644.30      655.88     12.15 o 
  -1   4   9        5.84        2.40      0.66 o 
   0   4   9       40.58       43.74      1.99 o 
   1   4   9      357.42      339.84      5.11 o 
   2   4   9        1.84        2.27      0.65 o 
   3   4   9       22.62       23.27      1.08 o 
   4   4   9       37.12       47.34      3.03 o 
   5   4   9       80.36       67.11      2.22 o 
   6   4   9       27.73       28.75      1.74 o 
   7   4   9        2.25        1.19      1.20 o 
   8   4   9       44.19       45.60      2.57 o 
   9   4   9       13.36       15.31      1.87 o 
  10   4   9        2.06        0.60      1.47 o 
  -7   5   9        0.53        4.29      3.27 o 
  -6   5   9        6.24        2.20      1.82 o 
  -5   5   9        0.04       -1.64      1.10 o 
  -4   5   9        0.01       -1.29      0.86 o 
  -3   5   9      580.53      548.10      9.42 o 
  -2   5   9       28.67       34.17      1.82 o 
  -1   5   9       28.40       39.26      1.52 o 
   0   5   9       80.39       85.05      1.98 o 
   1   5   9      192.18      191.79      3.25 o 
   2   5   9      157.37      150.56      2.90 o 
   3   5   9      157.85      149.22      2.92 o 
   4   5   9        3.75        3.55      0.83 o 
   5   5   9        3.31        3.82      0.88 o 
   6   5   9      255.61      256.63      6.37 o 
   7   5   9       10.18       11.50      1.49 o 
   8   5   9        0.50       -2.01      1.64 o 
   9   5   9       15.44       12.25      1.77 o 
  -6   6   9       45.09       41.48      2.70 o 
  -5   6   9        0.48       -0.56      1.26 o 
  -4   6   9        2.38        3.37      1.22 o 
  -3   6   9       53.43       45.18      2.47 o 
  -2   6   9      496.03      501.80      9.55 o 
  -1   6   9       80.07       77.86      2.12 o 
   0   6   9     1150.40     1228.43     21.00 o 
   1   6   9       92.94       86.78      1.91 o 
   2   6   9        8.33      240.29      9.46 o 
   3   6   9       26.22       23.90      1.08 o 
   4   6   9       19.77       34.61      3.09 o 
   5   6   9      285.40      291.96      5.32 o 
   6   6   9        9.62        8.95      1.18 o 
   7   6   9        0.59        0.73      1.81 o 
   8   6   9       14.28       11.32      1.79 o 
   9   6   9       46.74       51.33      3.24 o 
  -6   7   9       25.46       24.77      2.86 o 
  -5   7   9       16.89       15.65      1.78 o 
  -4   7   9      122.73      109.58      3.78 o 
  -3   7   9       28.66       28.52      1.92 o 
  -2   7   9       12.92        8.85      0.93 o 
  -1   7   9        5.11        5.27      0.91 o 
   0   7   9        1.23        4.21      0.70 o 
   1   7   9       38.01       37.43      1.30 o 
   2   7   9       28.24       66.72      3.34 o 
   3   7   9       11.54       13.13      0.85 o 
   4   7   9        0.29       -0.24      1.52 o 
   5   7   9       32.00       28.34      1.35 o 
   6   7   9      278.65      282.35      5.86 o 
   7   7   9        1.91       -0.50      1.19 o 
   8   7   9      110.06      113.52      4.93 o 
   9   7   9       20.31       15.66      1.84 o 
  -6   8   9        1.59        2.10      1.44 o 
  -5   8   9       99.39      101.00      3.74 o 
  -4   8   9       26.33       25.24      1.86 o 
  -3   8   9       73.34       64.75      3.23 o 
  -2   8   9       13.82       28.75      1.73 o 
  -1   8   9        4.86        2.89      0.75 o 
   0   8   9      188.54      210.84      4.07 o 
   1   8   9       96.83       81.21      1.79 o 
   2   8   9        0.48        2.73      0.60 o 
   3   8   9        1.96        0.55      0.55 o 
   4   8   9      111.35      111.83      2.24 o 
   5   8   9      137.85      139.28      2.68 o 
   6   8   9       44.38       43.45      1.91 o 
   7   8   9      115.86      106.10      3.44 o 
   8   8   9       40.08       43.84      2.43 o 
  -5   9   9       37.07       36.70      2.34 o 
  -4   9   9        0.47        0.83      1.08 o 
  -3   9   9       69.24       70.99      2.78 o 
  -2   9   9      181.64      186.14      3.42 o 
  -1   9   9      110.84      108.91      2.26 o 
   0   9   9       10.89       11.83      0.86 o 
   1   9   9       83.41       72.18      2.20 o 
   2   9   9      163.04      152.70      3.33 o 
   3   9   9       19.23       19.93      1.12 o 
   4   9   9        3.55        3.83      0.81 o 
   5   9   9       30.39       33.19      1.55 o 
   6   9   9        0.12       -0.38      0.83 o 
   7   9   9       57.55       62.63      2.46 o 
  -4  10   9       38.66       36.79      2.13 o 
  -3  10   9       17.60       15.48      1.43 o 
  -2  10   9        7.35        7.24      1.22 o 
  -1  10   9        0.31       -0.28      0.71 o 
   0  10   9       89.83       82.99      2.28 o 
   1  10   9       32.91       32.80      1.36 o 
   2  10   9       13.08       14.87      0.96 o 
   3  10   9        2.20        1.54      0.66 o 
   4  10   9       25.66       25.45      1.24 o 
   5  10   9        4.42        5.69      0.89 o 
   6  10   9       33.69       37.58      1.74 o 
  -3  11   9        2.65        0.00      1.27 o 
  -2  11   9       88.34       93.59      3.90 o 
  -1  11   9       67.13       65.64      2.29 o 
   0  11   9        0.61        1.35      0.69 o 
   1  11   9        3.48        3.87      0.72 o 
   2  11   9       33.85       31.70      1.25 o 
   3  11   9        0.79        0.48      0.61 o 
   4  11   9        0.07        1.15      0.65 o 
   5  11   9        0.11        0.85      0.70 o 
  -1  12   9        5.28        8.34      0.83 o 
   0  12   9       16.13       21.33      1.12 o 
   1  12   9        3.66        3.51      0.68 o 
   2  12   9       10.33       11.27      0.80 o 
   3  12   9        2.96        2.90      0.63 o 
   0  -4  10        1.55        1.07      3.44 o 
   1  -4  10        2.20        4.64      3.62 o 
   2  -4  10        6.09       12.68      4.07 o 
   3  -4  10        6.84        5.04      9.52 o 
   4  -4  10        0.72       -0.83      2.38 o 
   5  -4  10        0.65        1.57      2.45 o 
  -2  -3  10        2.09        8.59      2.70 o 
  -1  -3  10        8.77       12.37      5.37 o 
   0  -3  10        9.58        7.97      2.65 o 
   1  -3  10       23.56       35.22      3.60 o 
   2  -3  10        2.27        7.73      2.65 o 
   3  -3  10       42.23       49.68      5.76 o 
   4  -3  10        0.17        0.08      2.28 o 
   5  -3  10       41.01       42.73      3.97 o 
   6  -3  10        3.16        2.84      3.17 o 
  -3  -2  10        1.11        0.83      2.36 o 
  -2  -2  10        1.75        2.02      2.27 o 
  -1  -2  10        0.13       -3.03      2.03 o 
   0  -2  10       65.31       89.71      5.07 o 
   1  -2  10       11.72       21.34      3.13 o 
   2  -2  10       49.47       53.06      3.96 o 
   3  -2  10        4.32        1.14      2.09 o 
   4  -2  10        3.79        5.22      3.18 o 
   5  -2  10       22.65       22.86      3.07 o 
   6  -2  10       42.14       37.58      3.61 o 
   7  -2  10        9.91        7.81      2.54 o 
  -4  -1  10       10.70        6.54      2.18 o 
  -3  -1  10       12.05        7.93      2.56 o 
  -2  -1  10        1.50        3.15      2.19 o 
  -1  -1  10        0.64       -2.60      1.73 o 
   0  -1  10        2.59       -0.95      1.84 o 
   1  -1  10       24.11       33.54      3.17 o 
   2  -1  10        1.08        3.88      2.10 o 
   3  -1  10       22.22       20.29      4.48 o 
   4  -1  10       18.77       17.27      2.76 o 
   5  -1  10        0.34       -0.25      1.91 o 
   6  -1  10        5.66        2.78      2.19 o 
   7  -1  10       17.79       25.20      3.19 o 
   8  -1  10       26.24       26.49      3.44 o 
  -5   0  10        9.24        6.66      2.66 o 
  -4   0  10        0.77       -2.31      2.25 o 
  -3   0  10       40.47       51.93      3.95 o 
  -2   0  10       19.03       19.54      2.73 o 
  -1   0  10       29.14       27.81      2.90 o 
   0   0  10       23.34       32.57      3.01 o 
   1   0  10       15.85       10.19      1.38 o 
   2   0  10       27.22       32.99      1.97 o 
   3   0  10       69.26       62.77      2.66 o 
   4   0  10        0.01        2.27      1.17 o 
   5   0  10        0.49        1.35      1.51 o 
   6   0  10        0.14       -2.73      1.92 o 
   7   0  10        1.11       -2.63      3.57 o 
   8   0  10        2.92        4.31      3.06 o 
   9   0  10        4.73        7.21      2.62 o 
  -5   1  10       18.40       31.84      3.50 o 
  -4   1  10        0.23       -0.80      1.74 o 
  -3   1  10        0.33       -1.09      1.91 o 
  -2   1  10       11.23       10.63      3.81 o 
  -1   1  10       25.40       26.84      1.81 o 
   0   1  10       89.20      100.36      3.21 o 
   1   1  10       39.23       32.01      1.98 o 
   2   1  10       22.83       21.51      1.63 o 
   3   1  10        1.25       -0.65      0.97 o 
   4   1  10      107.95       99.49      3.26 o 
   5   1  10       87.03       84.54      3.03 o 
   6   1  10        1.93        0.96      1.20 o 
   7   1  10       45.59       42.53      2.82 o 
   8   1  10        7.74        9.91      5.27 o 
   9   1  10        9.51        6.98      2.61 o 
  -5   2  10        0.23        1.07      2.18 o 
  -4   2  10        0.00       -1.63      1.66 o 
  -3   2  10        1.16        0.25      1.42 o 
  -2   2  10       38.33       48.85      2.39 o 
  -1   2  10       85.32       93.65      3.11 o 
   0   2  10       22.86       26.83      1.75 o 
   1   2  10      204.61      170.82      4.29 o 
   2   2  10        5.32        2.99      1.83 o 
   3   2  10      126.74      130.62      3.66 o 
   4   2  10       23.56       31.44      1.85 o 
   5   2  10        5.17        5.73      1.23 o 
   6   2  10       57.01       56.28      2.53 o 
   7   2  10       29.45       41.02      2.28 o 
   8   2  10       13.72       18.36      1.85 o 
   9   2  10        1.61       -0.70      2.82 o 
  -6   3  10        0.37       -0.65      2.18 o 
  -5   3  10       22.33       24.45      3.16 o 
  -4   3  10       17.33       18.41      1.97 o 
  -3   3  10        3.15        2.28      1.26 o 
  -2   3  10        0.10       -1.59      1.06 o 
  -1   3  10       87.16       85.54      2.90 o 
   0   3  10       32.63       38.95      1.95 o 
   1   3  10        5.01        4.80      1.09 o 
   2   3  10       32.80       34.86      1.85 o 
   3   3  10       44.89       43.97      2.08 o 
   4   3  10       28.46       21.82      1.57 o 
   5   3  10       49.54       40.01      2.04 o 
   6   3  10        5.16        3.03      1.15 o 
   7   3  10       32.37       28.25      2.17 o 
   8   3  10       19.34       22.85      2.12 o 
   9   3  10       13.69       13.88      1.98 o 
  -6   4  10        2.35        3.94      3.29 o 
  -5   4  10        0.09       -0.27      1.77 o 
  -4   4  10        3.56        2.30      1.12 o 
  -3   4  10      133.59      136.50      3.94 o 
  -2   4  10       29.50       34.32      1.95 o 
  -1   4  10       37.72       32.45      1.82 o 
   0   4  10       27.08       33.53      1.80 o 
   1   4  10      106.82      100.81      3.00 o 
   2   4  10       71.33      128.91      6.13 o 
   3   4  10      115.09      111.89      3.20 o 
   4   4  10        0.36       -0.64      0.96 o 
   5   4  10        9.74        9.79      1.27 o 
   6   4  10       53.34       40.97      2.35 o 
   7   4  10        0.21        0.18      1.48 o 
   8   4  10        9.24        8.04      1.71 o 
   9   4  10       13.06       14.72      3.50 o 
  -6   5  10       19.83       13.80      3.87 o 
  -5   5  10        0.03        0.60      1.36 o 
  -4   5  10       31.25       29.29      2.20 o 
  -3   5  10        4.84        2.29      1.24 o 
  -2   5  10        0.30       20.15      2.63 o 
  -1   5  10       11.02       10.49      1.36 o 
   0   5  10      233.72      231.40      6.10 o 
   1   5  10        0.26        1.39      0.82 o 
   2   5  10        0.54        3.17      0.86 o 
   3   5  10       39.72       42.08      1.77 o 
   4   5  10       72.97       66.09      2.78 o 
   5   5  10       73.76       67.35      2.89 o 
   6   5  10      181.21      182.79      5.28 o 
   7   5  10       42.95       41.56      2.42 o 
   8   5  10        1.48        0.24      1.32 o 
   9   5  10       23.36       31.42      2.66 o 
  -6   6  10       25.29       25.90      2.40 o 
  -5   6  10       10.47        8.56      1.69 o 
  -4   6  10      106.93      114.20      4.08 o 
  -3   6  10       31.37       25.43      1.99 o 
  -2   6  10       34.91       36.17      2.14 o 
  -1   6  10        9.72        2.53      1.26 o 
   0   6  10      492.08      527.98      9.93 o 
   1   6  10      225.31      241.95      4.65 o 
   2   6  10      101.47      161.80      5.67 o 
   3   6  10       21.99       19.69      1.22 o 
   4   6  10        4.49        3.35      0.98 o 
   5   6  10       29.18       25.68      1.80 o 
   6   6  10        0.13        1.04      1.14 o 
   7   6  10       10.57        6.05      2.09 o 
   8   6  10        1.02       -1.06      1.23 o 
   9   6  10       22.51       27.53      2.27 o 
  -5   7  10       42.04       51.99      2.87 o 
  -4   7  10        0.92       -0.62      1.16 o 
  -3   7  10        0.10       -0.17      1.11 o 
  -2   7  10      250.37      233.52      6.02 o 
  -1   7  10       54.33       48.90      3.03 o 
   0   7  10       40.58       55.14      1.92 o 
   1   7  10      287.02      277.17      5.07 o 
   2   7  10        4.12        9.04      0.93 o 
   3   7  10       27.72       28.90      1.35 o 
   4   7  10        9.62        8.78      0.98 o 
   5   7  10       79.01       74.59      2.89 o 
   6   7  10      188.64      189.27      5.10 o 
   7   7  10       14.75       13.36      1.63 o 
   8   7  10       28.23       23.19      2.03 o 
  -5   8  10       49.45       49.67      2.82 o 
  -4   8  10       10.08       10.02      1.97 o 
  -3   8  10      104.29      111.82      3.75 o 
  -2   8  10       73.16       66.52      2.75 o 
  -1   8  10        2.56        5.05      0.98 o 
   0   8  10        7.71        7.11      0.89 o 
   1   8  10       28.84       24.85      1.24 o 
   2   8  10      142.48      129.23      2.82 o 
   3   8  10      103.74       99.06      2.39 o 
   4   8  10       23.55       22.27      1.27 o 
   5   8  10       17.98       18.37      1.36 o 
   6   8  10       21.67       19.24      1.64 o 
   7   8  10        6.75        2.93      1.26 o 
   8   8  10        0.38       -0.34      1.36 o 
  -4   9  10       39.48       42.96      2.54 o 
  -3   9  10        0.83        0.44      1.07 o 
  -2   9  10       45.33       41.33      2.16 o 
  -1   9  10       97.97       96.84      2.76 o 
   0   9  10      160.94      169.93      3.82 o 
   1   9  10       86.29       75.24      1.79 o 
   2   9  10       35.54       57.67      2.93 o 
   3   9  10       20.93       19.87      1.25 o 
   4   9  10      106.31      104.04      2.81 o 
   5   9  10        1.70        2.30      0.85 o 
   6   9  10        6.77        4.93      1.09 o 
   7   9  10        0.54        1.75      1.14 o 
  -3  10  10        3.78        5.22      1.22 o 
  -2  10  10       11.97       14.35      1.39 o 
  -1  10  10       24.30       23.12      1.29 o 
   0  10  10       25.91       27.53      1.46 o 
   1  10  10       14.58       13.37      1.34 o 
   2  10  10        7.31        7.99      0.92 o 
   3  10  10        0.20       -0.39      0.68 o 
   4  10  10       11.36       13.94      1.12 o 
   5  10  10       27.95       25.66      1.44 o 
   6  10  10       58.12       52.89      5.00 o 
  -2  11  10        5.36       11.79      1.68 o 
  -1  11  10        0.11        1.96      1.01 o 
   0  11  10       50.50       52.60      1.89 o 
   1  11  10       21.75       21.44      1.22 o 
   2  11  10        0.04       10.47      2.49 o 
   3  11  10       10.20       13.48      1.01 o 
   4  11  10        4.07        4.83      0.85 o 
   2  -3  11       69.80       70.58      5.08 o 
   3  -3  11        1.48        2.47      2.65 o 
  -1  -2  11        6.34        6.06      2.74 o 
   0  -2  11       11.18       19.19      3.31 o 
   1  -2  11        2.32        0.67      3.52 o 
   2  -2  11        9.87       14.96      3.01 o 
   3  -2  11       10.36       15.97      3.05 o 
   4  -2  11       28.61       27.84      3.40 o 
   5  -2  11        3.96        1.01      2.43 o 
   6  -2  11        5.11        2.58      2.43 o 
  -2  -1  11        6.42       14.40      3.38 o 
  -1  -1  11       42.21       40.73      3.76 o 
   0  -1  11        3.13       -0.17      2.22 o 
   1  -1  11        1.28        4.14      3.24 o 
   2  -1  11       27.37       31.53      3.37 o 
   3  -1  11       32.13       45.98      3.86 o 
   4  -1  11       13.70       11.29      3.14 o 
   5  -1  11        5.32        6.34      2.52 o 
   6  -1  11        0.11       -2.96      2.07 o 
   7  -1  11        1.43        1.57      2.40 o 
  -3   0  11        0.83       -0.79      2.23 o 
  -2   0  11        4.57        6.51      2.45 o 
  -1   0  11       36.85       42.16      3.67 o 
   0   0  11       11.39        9.66      3.64 o 
   1   0  11        0.47       -0.49      2.62 o 
   2   0  11        3.17        3.13      2.10 o 
   3   0  11        8.31        9.86      2.52 o 
   4   0  11       17.72       22.15      3.07 o 
   5   0  11      100.26      118.49      5.89 o 
   6   0  11        0.34       -1.63      2.01 o 
   7   0  11        9.71        7.18      2.58 o 
  -4   1  11        1.27       -1.56      1.89 o 
  -3   1  11        0.11        1.60      2.29 o 
  -2   1  11        0.04        0.86      2.17 o 
  -1   1  11       31.63       31.73      3.23 o 
   0   1  11        0.22        0.25      1.87 o 
   1   1  11       13.41       10.28      1.79 o 
   2   1  11        3.54        5.00      1.57 o 
   3   1  11       14.51       13.80      1.56 o 
   4   1  11        1.64        1.04      1.20 o 
   5   1  11        2.48       -2.20      1.47 o 
   6   1  11      118.90      123.65      5.85 o 
   7   1  11        5.81        4.30      2.65 o 
   8   1  11        2.00        2.33      2.37 o 
  -4   2  11       13.62       12.21      2.38 o 
  -3   2  11        5.00        5.33      2.35 o 
  -2   2  11        8.93       14.72      3.52 o 
  -1   2  11        5.38        3.26      1.22 o 
   0   2  11        5.11        4.90      1.30 o 
   1   2  11       59.79       57.93      2.52 o 
   2   2  11       36.05       35.03      2.03 o 
   3   2  11       74.97       73.94      2.89 o 
   4   2  11        3.25        1.12      1.20 o 
   5   2  11        2.07        2.29      1.26 o 
   6   2  11        0.06       -0.60      1.21 o 
   7   2  11        0.27        0.55      1.55 o 
   8   2  11       23.04       22.16      4.09 o 
  -4   3  11        0.24       -2.48      1.65 o 
  -3   3  11      105.77       98.44      5.38 o 
  -2   3  11        7.23        6.69      1.47 o 
  -1   3  11      221.88      231.71      5.59 o 
   0   3  11       19.95       22.99      1.80 o 
   1   3  11        0.52        1.52      1.10 o 
   2   3  11        0.03        0.28      1.07 o 
   3   3  11      113.25      102.20      3.27 o 
   4   3  11        9.67        7.30      1.33 o 
   5   3  11        3.11        2.45      1.21 o 
   6   3  11       16.61       16.00      1.83 o 
   7   3  11        6.47        6.43      1.65 o 
   8   3  11        6.54        7.04      2.65 o 
  -4   4  11        0.17        1.05      1.93 o 
  -3   4  11        1.57        0.82      1.38 o 
  -2   4  11       19.42       18.40      1.71 o 
  -1   4  11       41.33       37.03      2.09 o 
   0   4  11      137.00      149.04      5.29 o 
   1   4  11       44.99       42.35      2.10 o 
   2   4  11       60.41       62.90      2.48 o 
   3   4  11        6.61        6.93      1.22 o 
   4   4  11       65.24       63.81      3.25 o 
   5   4  11       66.26       69.98      3.05 o 
   6   4  11       11.78       16.08      1.79 o 
   7   4  11       46.49       49.78      2.81 o 
   8   4  11        0.27        0.92      1.43 o 
  -5   5  11        1.12        3.99      3.19 o 
  -4   5  11       11.87       11.53      3.01 o 
  -3   5  11       26.59       28.13      2.24 o 
  -2   5  11        1.57        8.65      2.61 o 
  -1   5  11      301.14      289.91      7.30 o 
   0   5  11       10.32        5.93      1.35 o 
   1   5  11        1.28        0.18      1.12 o 
   2   5  11      249.91      222.67      5.84 o 
   3   5  11        0.00        1.77      1.10 o 
   4   5  11        2.18        1.51      1.14 o 
   5   5  11       10.82       12.75      1.61 o 
   6   5  11        0.54        1.48      1.33 o 
   7   5  11       14.61       23.07      2.05 o 
   8   5  11       40.15       39.55      2.91 o 
  -4   6  11       34.23       30.76      2.39 o 
  -3   6  11       73.04       76.09      3.38 o 
  -2   6  11       37.76       43.32      2.52 o 
  -1   6  11       19.06       18.64      1.78 o 
   0   6  11       55.69       59.31      2.72 o 
   1   6  11        3.40        1.86      1.19 o 
   2   6  11       91.60      102.84      3.50 o 
   3   6  11       98.58       97.30      3.36 o 
   4   6  11        5.20        4.15      1.21 o 
   5   6  11       11.88       12.11      2.01 o 
   6   6  11        3.54        4.00      1.36 o 
   7   6  11       35.90       41.94      2.49 o 
   8   6  11        0.20       -0.72      1.27 o 
  -4   7  11        0.27        0.24      1.33 o 
  -3   7  11       26.43       29.17      2.15 o 
  -2   7  11       39.09       30.17      2.18 o 
  -1   7  11        4.29        3.83      1.54 o 
   0   7  11       33.08       35.05      2.10 o 
   1   7  11       24.21       24.28      1.83 o 
   2   7  11       26.38       53.30      2.47 o 
   3   7  11       99.96       97.30      3.31 o 
   4   7  11        0.09        2.25      2.14 o 
   5   7  11       30.51       36.13      3.13 o 
   6   7  11       26.97       29.67      2.08 o 
   7   7  11       51.64       54.32      2.77 o 
  -4   8  11        8.79        9.77      1.87 o 
  -3   8  11       49.65       51.35      3.54 o 
  -2   8  11        5.54       15.95      3.07 o 
  -1   8  11       21.76       18.49      1.67 o 
   0   8  11       14.53       14.50      1.96 o 
   1   8  11       28.72       30.21      1.83 o 
   2   8  11        6.87       13.70      1.37 o 
   3   8  11        0.26        0.04      0.94 o 
   4   8  11       13.80       13.42      1.41 o 
   5   8  11        6.61        6.44      1.24 o 
   6   8  11        0.76       -1.33      1.05 o 
   7   8  11        2.12        0.81      1.27 o 
  -3   9  11       31.12       27.80      2.31 o 
  -2   9  11       31.66       31.50      2.03 o 
  -1   9  11        7.84        5.80      1.19 o 
   0   9  11        4.97        2.04      1.04 o 
   1   9  11       37.29       29.28      1.79 o 
   2   9  11       34.58       39.56      1.72 o 
   3   9  11        5.71        5.51      0.93 o 
   4   9  11        2.07        2.58      0.99 o 
   5   9  11        0.09        0.05      0.93 o 
   6   9  11        0.42        0.24      1.02 o 
  -2  10  11       32.79       37.56      2.72 o 
  -1  10  11       26.73       29.92      1.77 o 
   0  10  11        1.01        1.28      0.90 o 
   1  10  11        9.01       11.83      1.35 o 
   2  10  11        1.05        1.05      0.98 o 
   3  10  11       44.50       43.92      2.52 o 
   4  10  11        9.68        9.15      1.29 o 
   5  10  11        0.96        2.05      2.15 o 
   0  11  11        8.54       10.18      1.56 o 
   1  11  11        1.91        0.42      0.97 o 
   2  11  11       25.81       28.50      1.72 o 
   1  -1  12       19.07       12.12      3.05 o 
   2  -1  12       19.81       17.37      5.85 o 
   3  -1  12        5.87        8.64      2.80 o 
   4  -1  12       25.90       28.99      3.63 o 
  -1   0  12       13.87       16.89      7.41 o 
   0   0  12       15.22       22.79      3.29 o 
   1   0  12        7.18        7.39      2.59 o 
   2   0  12        8.86       13.97      3.48 o 
   3   0  12       27.91       32.79      4.73 o 
   4   0  12        0.44        2.91      2.70 o 
   5   0  12        9.20       18.66      3.23 o 
   6   0  12       41.25       51.99      8.30 o 
  -2   1  12       13.51       17.86      3.20 o 
  -1   1  12        7.58        6.02      4.33 o 
   0   1  12        7.37        6.94      2.55 o 
   1   1  12       39.05       53.90      4.06 o 
   2   1  12        9.00        7.13      2.47 o 
   3   1  12        9.86       10.76      2.66 o 
   4   1  12        3.83        6.58      2.55 o 
   5   1  12       15.55       18.55      3.07 o 
   6   1  12        9.65       10.44      2.78 o 
  -2   2  12       15.86       13.73      3.53 o 
  -1   2  12       32.38       29.00      3.32 o 
   0   2  12        0.36       -0.12      2.77 o 
   1   2  12       12.68        7.09      2.41 o 
   2   2  12       72.38       74.92      3.68 o 
   3   2  12       66.96       74.39      3.71 o 
   4   2  12        8.26       11.46      2.07 o 
   5   2  12       16.75       15.50      2.23 o 
   6   2  12        0.02        0.85      3.24 o 
   7   2  12        3.93        6.59      3.14 o 
  -3   3  12       12.26       10.41      3.82 o 
  -2   3  12       22.01       29.03      5.93 o 
  -1   3  12      101.97       95.09      4.17 o 
   0   3  12        2.08        0.38      1.27 o 
   1   3  12        2.84        6.22      1.81 o 
   2   3  12       11.09       13.39      1.62 o 
   3   3  12       51.34       53.41      2.56 o 
   4   3  12        9.60       10.53      1.73 o 
   5   3  12       78.08       78.50      3.55 o 
   6   3  12        8.02        5.15      1.67 o 
   7   3  12        0.24        0.47      1.82 o 
  -3   4  12        1.94        1.12      3.12 o 
  -2   4  12        2.65        3.96      1.56 o 
  -1   4  12      100.97       99.36      3.90 o 
   0   4  12        0.18        0.60      1.25 o 
   1   4  12        0.37        0.75      1.53 o 
   2   4  12       42.21       41.98      2.50 o 
   3   4  12        9.08        9.03      1.56 o 
   4   4  12        5.88        5.14      1.47 o 
   5   4  12        1.01       -0.12      1.45 o 
   6   4  12        1.14        0.21      1.39 o 
   7   4  12       87.66       88.91      3.82 o 
  -3   5  12       10.01        8.16      1.78 o 
  -2   5  12       99.91      100.87      3.99 o 
  -1   5  12       64.74       58.54      2.97 o 
   0   5  12        9.97        8.23      1.57 o 
   1   5  12        4.05        6.26      1.80 o 
   2   5  12       99.30       99.13      3.70 o 
   3   5  12        1.92        5.26      1.41 o 
   4   5  12       11.24        9.69      1.79 o 
   5   5  12        7.27        6.51      1.54 o 
   6   5  12        6.60        7.24      2.05 o 
   7   5  12        0.31       -1.37      1.42 o 
  -3   6  12       43.48       40.92      2.68 o 
  -2   6  12       38.89       43.59      2.69 o 
  -1   6  12        0.36        1.46      1.77 o 
   0   6  12       11.57        8.30      1.62 o 
   1   6  12       46.87       42.40      2.49 o 
   2   6  12       71.63       71.94      3.14 o 
   3   6  12      188.26      186.72      5.33 o 
   4   6  12        5.97       11.35      3.15 o 
   5   6  12        1.57        1.08      1.27 o 
   6   6  12        5.50        5.24      1.55 o 
   7   6  12       85.79       94.54      7.26 o 
  -3   7  12       38.15       38.52      2.59 o 
  -2   7  12        5.00        4.42      1.68 o 
  -1   7  12       22.85       25.24      2.06 o 
   0   7  12      116.25      112.26      3.88 o 
   1   7  12       20.82       18.45      1.80 o 
   2   7  12       39.18       44.48      3.55 o 
   3   7  12      120.34      115.77      3.88 o 
   4   7  12        7.92        6.43      2.12 o 
   5   7  12      112.64      119.25      5.48 o 
   6   7  12        1.27        1.54      1.37 o 
  -2   8  12       59.45       54.56      3.50 o 
  -1   8  12       29.10       27.77      2.06 o 
   0   8  12        2.99        3.74      1.25 o 
   1   8  12        7.04        2.84      1.72 o 
   2   8  12       88.63       81.51      3.10 o 
   3   8  12        3.19        2.99      1.17 o 
   4   8  12        0.09        1.02      1.09 o 
   5   8  12       12.22       12.32      1.93 o 
   6   8  12       22.53       19.00      1.82 o 
  -1   9  12        7.45        5.46      1.65 o 
   0   9  12       47.53       49.72      2.48 o 
   1   9  12       49.22       50.25      2.40 o 
   2   9  12        6.58        6.68      1.23 o 
   3   9  12       16.60       15.25      1.47 o 
   4   9  12        0.12        1.72      1.54 o 
   5   9  12        1.21        0.36      1.42 o 
   1  10  12       23.06       19.48      1.57 o 
   2  10  12       32.15       34.64      1.83 o 
   3  10  12       11.26       10.63      1.67 o 
   1   2  13       48.01       47.59      6.95 o 
   2   2  13        2.41        0.45      2.34 o 
   3   2  13        9.05       12.30      3.77 o 
   4   2  13        7.48        3.92      3.57 o 
   0   3  13        4.72        5.76      3.44 o 
   1   3  13        0.12        2.10      2.97 o 
   2   3  13       15.19       15.32      3.77 o 
   3   3  13       12.73       10.75      2.38 o 
   4   3  13        0.52        4.23      2.21 o 
   5   3  13        0.03        1.62      3.09 o 
  -1   4  13       66.75       63.78      6.19 o 
   0   4  13        0.37       -2.12      1.81 o 
   1   4  13       46.94       43.40      2.72 o 
   2   4  13       27.30       31.06      2.40 o 
   3   4  13        8.30        4.50      1.61 o 
   4   4  13       13.49       11.76      1.87 o 
   5   4  13        3.60        3.20      1.63 o 
  -1   5  13       24.37       36.14      2.65 o 
   0   5  13        0.01       -1.23      1.34 o 
   1   5  13        7.19        5.62      1.65 o 
   2   5  13       66.07       81.21      3.59 o 
   3   5  13        8.62        9.31      3.47 o 
   4   5  13      103.69      114.24      4.25 o 
   5   5  13        3.64        3.15      1.61 o 
  -1   6  13        1.40        3.29      1.70 o 
   0   6  13       25.60       23.90      2.27 o 
   1   6  13        2.33        1.11      1.84 o 
   2   6  13       11.58       18.23      2.20 o 
   3   6  13        6.89       10.88      1.76 o 
   4   6  13        0.07       -1.68      1.58 o 
   5   6  13      108.92      106.77      4.10 o 
   0   7  13       21.70       26.08      2.19 o 
   1   7  13        0.69       -1.36      1.26 o 
   2   7  13        5.84        6.36      1.52 o 
   3   7  13       20.12       20.57      1.99 o 
   4   7  13        0.35       -0.69      1.28 o 
   1   8  13       14.73       14.85      1.73 o 
   2   8  13        0.08        3.12      2.27 o 
   3   8  13       20.63       19.42      1.87 o 
                                                 
