# Supplementary material for: In Silico Molecular Docking and In Vitro Antidiabetic Studies of Dihydropyrimido[4,5-a]acridin-2-amines
Source: Biomed Res Int. 2014 Jun 2;2014:971569. doi: 10.1155/2014/971569 (PMC4060768; doi:10.1155/2014/971569)
Supplement: Supplementary file 1 — CCDC 988641 contains the supplementary crystallographic data for this paper. These data can be obtained free of charge from the Cambridge Crystallographic Data Centre via https://www.ccdc.cam.ac.uk/data-request/cif or from the Cambridge Crystallographic Data Centre, 12 Union Road, Cambridge CB2 1EZ, UK; fax: +44 1223 336033; or e-mail: deposit@ccdc.cam.ac.uk. [file 971569.f1.zip › 971569.f1/singlecrystalxrddata/NGC.hkl]

  -1   0   0  666.92   22.01
   1   0   0  675.58   22.67
   1   0   0  680.79   22.77
   1   0   0  675.38   22.02
  -1   0   0  689.18   22.79
  -2   0   0  287.77    9.88
   2   0   0  289.81    9.88
   2   0   0  295.80    9.87
   2   0   0  288.75    9.89
   2   0   0  294.19    9.88
   2   0   0  286.61    9.57
  -2   0   0  287.78    9.94
   2   0   0  298.86    9.55
  -2   0   0  282.78    9.87
  -2   0   0  287.83    9.89
  -2   0   0  301.77    9.57
  -2   0   0  295.83    9.86
   3   0   0    9.07    0.72
   3   0   0    9.52    0.69
   3   0   0    9.46    0.68
   3   0   0    8.27    0.74
  -3   0   0    8.46    0.70
  -3   0   0    9.34    0.70
  -3   0   0    9.50    0.69
   3   0   0    9.60    0.65
  -3   0   0    8.89    0.72
  -3   0   0    8.92    0.72
  -3   0   0    9.24    0.68
   3   0   0    9.59    0.74
  -3   0   0    8.89    0.61
   4   0   0   45.68    1.98
   4   0   0   47.03    2.09
  -4   0   0   43.32    2.03
  -4   0   0   47.09    1.97
  -4   0   0   46.51    1.91
   4   0   0   45.33    2.10
   4   0   0   48.04    1.96
   4   0   0   46.34    2.05
  -4   0   0   46.79    2.08
  -4   0   0   48.42    2.11
  -4   0   0   46.12    2.12
  -4   0   0   44.24    2.08
   5   0   0  151.79    5.92
  -5   0   0  156.88    5.94
  -5   0   0  156.26    5.57
   5   0   0  154.03    5.65
  -5   0   0  157.82    5.90
  -5   0   0  161.43    5.91
   5   0   0  160.24    5.62
   5   0   0  155.73    5.86
  -5   0   0  161.84    5.91
  -6   0   0   67.22    2.85
  -6   0   0   73.09    3.15
   6   0   0   65.96    3.19
  -6   0   0   72.03    3.22
  -6   0   0   68.76    3.11
   6   0   0   69.99    3.14
   6   0   0   72.51    2.97
   6   0   0   67.39    2.97
  -6   0   0   65.84    3.13
   7   0   0    4.39    0.77
   7   0   0    5.27    0.90
  -7   0   0    4.51    1.03
  -7   0   0    4.49    0.92
  -7   0   0    5.15    0.95
  -7   0   0    5.08    0.85
   7   0   0    4.64    1.03
   7   0   0    4.01    0.89
  -7   0   0    4.27    0.75
  -8   0   0    1.12    0.93
  -8   0   0    2.22    0.70
  -8   0   0    0.94    0.91
  -8   0   0    1.07    0.88
   8   0   0    1.44    0.83
   8   0   0    2.50    1.04
   8   0   0    1.63    0.89
  -9   0   0   12.66    1.59
   9   0   0   11.26    1.41
  -9   0   0   11.79    1.63
   9   0   0   11.50    1.72
  -9   0   0   15.31    1.68
 -10   0   0    7.02    1.49
  10   0   0    8.49    1.67
 -10   0   0    6.30    1.47
  11   0   0   -0.57    1.25
 -11   0   0    2.00    1.25
 -12   0   0    3.08    1.63
  12   0   0    5.15    1.89
 -13   0   0    1.27    1.57
 -13   1   0    5.27    1.92
  13  -1   0    3.20    1.84
 -12   1   0    0.08    1.31
  12  -1   0   -1.02    1.46
 -11   1   0    3.12    1.36
 -11   1   0    0.73    0.98
  11  -1   0    1.29    1.32
 -10   1   0    7.92    1.51
  10  -1   0    6.34    1.58
 -10   1   0    5.42    1.49
   9  -1   0   33.54    2.22
  -9   1   0   33.27    2.44
  -9   1   0   31.35    2.36
   9  -1   0   33.39    2.56
  -9   1   0   30.19    2.22
  -8   1   0   62.22    3.28
   8  -1   0   63.37    3.46
   8  -1   0   64.79    3.32
  -8   1   0   63.19    3.39
  -8   1   0   63.62    2.98
   8  -1   0   64.39    3.19
  -8   1   0   61.77    3.17
  -7   1   0  120.13    4.95
   7  -1   0  120.94    4.81
  -7   1   0  120.80    5.05
   7  -1   0  123.36    5.16
  -7   1   0  123.90    4.71
   7  -1   0  120.71    5.05
  -7   1   0  119.78    5.10
  -6   1   0    8.43    0.93
  -6   1   0   10.43    1.09
  -6   1   0    7.69    1.09
  -6   1   0   11.25    1.06
   6  -1   0    8.58    1.06
   6  -1   0    9.04    1.13
   6  -1   0    9.13    0.99
   5  -1   0   42.91    2.10
  -5   1   0   45.84    2.05
   5  -1   0   42.78    2.01
   5  -1   0   40.88    2.19
   5  -1   0   44.55    1.98
  -5   1   0   45.15    2.13
  -5   1   0   40.88    2.10
  -5   1   0   41.09    2.18
  -5   1   0   41.28    1.95
   5  -1   0   40.81    2.10
  -5   1   0   42.77    2.03
   4  -1   0   86.14    3.41
  -4   1   0   93.32    3.60
  -4   1   0   90.13    3.60
   4  -1   0   93.86    3.62
  -4   1   0   93.24    3.52
  -4   1   0   87.67    3.39
   4  -1   0   98.78    3.45
  -4   1   0   96.18    3.48
   4  -1   0   89.72    3.60
   4  -1   0   89.75    3.64
  -4   1   0   93.17    3.68
   3  -1   0  689.55   21.63
  -3   1   0  657.80   22.35
  -3   1   0  697.43   22.32
  -3   1   0  684.54   22.37
  -3   1   0  652.44   22.42
   3  -1   0  645.38   22.36
   3  -1   0  686.48   22.32
  -3   1   0  666.41   21.62
  -3   1   0  684.12   21.65
  -3   1   0  653.79   22.32
   3  -1   0  655.60   22.33
   3  -1   0  644.71   21.63
   3  -1   0  646.63   22.34
  -2   1   0  212.58    7.51
  -2   1   0  225.80    7.52
   2  -1   0  227.67    7.52
   2  -1   0  212.81    7.52
  -2   1   0  224.28    7.28
  -2   1   0  222.41    7.52
  -2   1   0  224.06    7.27
   2  -1   0  212.06    7.52
  -2   1   0  214.71    7.51
  -2   1   0  210.90    7.50
   2  -1   0  220.96    7.25
  -1   1   0  374.76   12.81
   1  -1   0  361.18   12.48
  -1   1   0  396.72   12.51
  -1   1   0  392.97   12.90
  -1   1   0  353.46   12.46
   1  -1   0  401.10   12.93
   1  -1   0  398.35   12.88
   1  -1   0  411.84   12.51
  -1   1   0  341.21   12.82
  -1   1   0  395.50   12.85 
   1   1   0 2234.60   73.86
  -1  -1   0 2303.07   75.98
  -1  -1   0 2241.27   74.17
  -1  -1   0 2194.16   76.00
   1   1   0 2241.29   75.79
   1   1   0 2303.98   75.22
  -1  -1   0 2342.30   74.01
   1   1   0 2235.00   76.05
   1   1   0 2294.50   73.89
   1   1   0 2296.84   75.58
  -1  -1   0 2224.64   75.52
  -1  -1   0 2167.41   76.00
   1   1   0 2278.83   75.80
  -2  -1   0 1146.59   39.85
   2   1   0 1187.60   39.97
   2   1   0 1234.17   39.96
   2   1   0 1218.31   39.95
   2   1   0 1251.84   39.83
   2   1   0 1188.17   39.84
  -2  -1   0 1166.18   40.20
   2   1   0 1182.80   38.69
   2   1   0 1203.17   38.76
  -2  -1   0 1242.09   38.72
  -2  -1   0 1200.21   38.71
  -2  -1   0 1253.25   39.83
  -2  -1   0 1181.99   40.00
   3   1   0   53.69    2.17
  -3  -1   0   54.25    2.20
  -3  -1   0   52.21    2.21
   3   1   0   52.38    2.09
  -3  -1   0   54.63    2.21
   3   1   0   53.18    2.21
   3   1   0   55.05    2.16
   3   1   0   55.03    2.06
  -3  -1   0   52.74    2.01
  -3  -1   0   57.13    2.08
  -3  -1   0   52.32    2.24
  -4  -1   0    0.01    0.28
  -4  -1   0   -0.44    0.34
  -4  -1   0   -0.23    0.28
   4   1   0   -0.39    0.31
  -4  -1   0   -0.28    0.31
   4   1   0   -0.61    0.35
  -4  -1   0    0.33    0.44
  -4  -1   0   -0.20    0.39
   4   1   0    0.09    0.31
   4   1   0    0.36    0.35
   5   1   0    7.40    0.75
  -5  -1   0    6.86    0.81
   5   1   0    7.90    0.80
   5   1   0    6.62    0.78
  -5  -1   0    6.00    0.78
  -5  -1   0    8.07    0.85
  -5  -1   0    7.80    0.70
   5   1   0    7.03    0.87
  -5  -1   0    7.22    0.86
  -5  -1   0    6.20    0.84
  -6  -1   0   34.52    2.04
   6   1   0   32.05    1.83
  -6  -1   0   36.95    2.07
  -6  -1   0   31.94    1.69
   6   1   0   34.43    1.82
   6   1   0   35.62    2.06
  -6  -1   0   34.08    1.96
   6   1   0   35.67    1.96
  -6  -1   0   33.81    1.98
  -7  -1   0  101.15    4.45
  -7  -1   0  100.60    4.03
  -7  -1   0   99.67    4.46
   7   1   0  110.06    4.24
   7   1   0   99.54    4.49
  -7  -1   0  103.75    4.47
   7   1   0  102.24    4.24
  -7  -1   0  106.47    4.48
   7   1   0  103.03    4.41
  -8  -1   0  375.09   12.97
  -8  -1   0  381.18   13.76
   8   1   0  396.97   13.32
  -8  -1   0  373.66   13.83
   8   1   0  366.05   13.77
  -8  -1   0  384.43   13.79
   9   1   0    6.73    1.54
   9   1   0    7.73    1.29
  -9  -1   0    5.34    1.40
  -9  -1   0    7.33    1.45
  -9  -1   0    5.18    1.37
 -10  -1   0   27.93    2.47
  10   1   0   36.54    2.95
 -10  -1   0   33.45    2.78
 -10  -1   0   30.01    2.57
 -11  -1   0   -0.61    1.13
  11   1   0    2.54    1.41
 -12  -1   0    0.64    1.33
 -13  -1   0    1.65    1.56
  13  -2   0    0.49    1.62
 -13   2   0    2.08    1.70
  12  -2   0   -1.26    1.37
 -12   2   0    0.65    1.39
  11  -2   0   -0.64    1.21
 -11   2   0    1.51    0.93
 -11   2   0    1.79    1.28
 -10   2   0   13.59    1.69
 -10   2   0   10.34    1.65
  10  -2   0   12.09    1.87
  -9   2   0   44.90    2.96
   9  -2   0   48.12    3.08
  -9   2   0   44.26    2.66
   9  -2   0   47.56    2.95
  -9   2   0   43.55    2.51
  -8   2   0  111.43    4.73
  -8   2   0  118.43    4.98
  -8   2   0  111.50    4.58
   8  -2   0  110.65    4.63
   8  -2   0  110.91    4.97
   8  -2   0  112.89    5.11
  -8   2   0  107.98    4.96
  -7   2   0    2.11    0.72
  -7   2   0    1.16    0.81
   7  -2   0    3.05    0.87
  -7   2   0    2.14    0.80
   7  -2   0    2.48    0.75
  -7   2   0    1.43    0.71
   7  -2   0    1.52    0.88
  -6   2   0  323.90   10.37
  -6   2   0  298.28   10.25
   6  -2   0  302.48   10.70
   6  -2   0  281.42   10.72
  -6   2   0  282.96   10.67
   6  -2   0  301.94   10.75
   6  -2   0  283.35   10.22
  -6   2   0  298.61   10.54
  -6   2   0  304.14   10.68
   5  -2   0    1.52    0.61
   5  -2   0    1.02    0.38
  -5   2   0    1.40    0.61
  -5   2   0    1.99    0.58
   5  -2   0    1.33    0.65
  -5   2   0    0.03    0.66
  -5   2   0    2.19    0.55
   5  -2   0    1.34    0.71
  -5   2   0    0.89    0.59
   4  -2   0  350.01   12.19
   4  -2   0  345.24   12.21
  -4   2   0  351.64   12.20
  -4   2   0  347.03   12.09
  -4   2   0  347.68   12.18
   4  -2   0  369.34   12.23
   4  -2   0  346.52   12.22
  -4   2   0  367.00   11.81
  -4   2   0  355.60   11.77
   3  -2   0    0.30    0.33
  -3   2   0    0.42    0.32
   3  -2   0   -0.08    0.10
   3  -2   0    0.44    0.28
   3  -2   0    0.28    0.23
   3  -2   0    0.80    0.32
  -3   2   0    0.02    0.25
   3  -2   0    1.08    0.37
  -3   2   0    0.38    0.30
  -3   2   0    0.62    0.25
  -3   2   0    0.45    0.23
  -2   2   0  112.71    4.18
  -2   2   0  118.67    4.04
  -2   2   0  120.89    4.21
   2  -2   0  122.46    4.01
  -2   2   0  118.45    4.03
   2  -2   0  117.01    4.21
  -2   2   0  117.96    4.17
   2  -2   0  119.21    4.20
   2  -2   0  115.69    4.00
   2  -2   0  120.29    4.21
  -2   2   0  116.59    4.17
   2  -2   0  113.15    4.20
   1  -2   0   69.84    2.43
  -1   2   0   70.17    2.45
  -1   2   0   71.63    2.54
   1  -2   0   69.75    2.58
   1  -2   0   72.46    2.57
   1  -2   0   72.64    2.43
  -1   2   0   70.80    2.54
   1  -2   0   73.24    2.57
  -1   2   0   73.69    2.59
  -1   2   0   74.83    2.58
  -1   2   0   69.49    2.45
   0  -2   0 1986.84   66.76
   0   2   0 1970.83   68.27
   0  -2   0 1898.01   66.70
   0   2   0 1975.55   66.49
   0   2   0 1952.94   65.69
   0  -2   0 1995.76   66.05
   0  -2   0 1939.02   66.26
   0   2   0 1971.10   65.62
   0  -2   0 1984.94   66.66
   0   2   0 1950.75   68.17
   1   2   0 1471.59   48.10
   1   2   0 1471.24   46.99
  -1  -2   0 1472.03   47.96
  -1  -2   0 1437.54   47.71
   1   2   0 1441.57   47.58
  -1  -2   0 1399.90   47.86
  -1  -2   0 1439.63   48.00
  -1  -2   0 1413.06   48.17
   1   2   0 1393.86   48.03
   1   2   0 1412.61   47.01
   1   2   0 1462.36   47.66
   2   2   0 1116.62   38.00
  -2  -2   0 1134.48   38.05
   2   2   0 1121.76   36.86
  -2  -2   0 1130.20   38.05
  -2  -2   0 1174.68   38.05
   2   2   0 1163.54   37.90
  -2  -2   0 1104.71   38.26
  -2  -2   0 1124.02   37.94
   2   2   0 1165.01   36.82
  -2  -2   0 1167.91   36.87
  -2  -2   0 1191.52   36.85
   3   2   0  188.08    6.64
  -3  -2   0  186.67    6.83
  -3  -2   0  182.54    6.67
  -3  -2   0  193.53    6.70
  -3  -2   0  200.75    6.69
   3   2   0  188.37    6.67
  -3  -2   0  192.32    6.33
   3   2   0  190.09    6.45
  -3  -2   0  185.76    6.68
   3   2   0  190.55    6.40
   4   2   0   37.34    1.73
  -4  -2   0   36.12    1.75
  -4  -2   0   35.11    1.51
  -4  -2   0   34.70    1.76
   4   2   0   35.98    1.60
   4   2   0   36.23    1.66
   4   2   0   32.87    1.73
  -4  -2   0   39.30    1.79
  -4  -2   0   33.68    1.72
  -4  -2   0   35.82    1.85
  -5  -2   0  160.22    5.63
   5   2   0  156.95    5.96
   5   2   0  158.61    5.80
   5   2   0  161.63    6.07
  -5  -2   0  157.21    6.04
  -5  -2   0  173.43    6.07
   5   2   0  164.80    5.74
  -5  -2   0  163.12    6.19
  -5  -2   0  157.07    6.04
  -6  -2   0   62.87    3.02
   6   2   0   67.61    2.82
  -6  -2   0   61.53    2.97
   6   2   0   65.25    3.06
  -6  -2   0   68.13    2.99
   6   2   0   63.37    2.85
  -6  -2   0   63.18    3.07
   6   2   0   61.07    2.90
  -6  -2   0   63.84    2.63
  -7  -2   0    7.66    1.12
   7   2   0    7.03    1.09
   7   2   0    8.85    1.06
   7   2   0    6.65    1.18
  -7  -2   0    6.03    1.17
   7   2   0    8.87    1.14
  -7  -2   0    7.50    1.13
  -7  -2   0    9.16    1.24
  -7  -2   0    8.07    0.90
   8   2   0   69.47    3.57
   8   2   0   68.98    3.81
  -8  -2   0   71.94    3.66
  -8  -2   0   66.35    3.63
  -8  -2   0   64.79    3.68
  -9  -2   0   31.85    2.62
   9   2   0   34.48    2.78
   9   2   0   27.66    2.28
  -9  -2   0   35.81    2.61
  -9  -2   0   33.08    2.55
 -10  -2   0    1.10    1.06
 -10  -2   0    0.38    1.11
  10   2   0   -0.50    0.91
  10   2   0    0.85    1.24
 -11  -2   0    0.86    1.22
 -12  -2   0   -2.88    1.08
 -13  -2   0    0.16    1.36
  13  -3   0    1.96    1.78
 -13   3   0   -2.28    1.43
  12  -3   0    3.10    1.71
 -12   3   0    3.95    1.64
 -11   3   0    1.57    1.13
  11  -3   0    1.37    1.51
 -11   3   0    4.27    1.48
  10  -3   0   -0.15    1.16
 -10   3   0    0.56    1.11
 -10   3   0   -0.05    0.86
  -9   3   0   22.88    1.90
  -9   3   0   23.60    2.26
   9  -3   0   23.19    2.25
   9  -3   0   24.31    2.21
  -9   3   0   23.85    1.87
   8  -3   0   11.90    1.52
  -8   3   0   12.92    1.56
   8  -3   0    9.97    1.50
  -8   3   0   10.31    1.25
  -8   3   0   13.71    1.47
  -8   3   0   12.91    1.33
  -7   3   0  121.24    4.72
  -7   3   0  126.89    4.81
  -7   3   0  123.01    4.99
   7  -3   0  101.74    4.56
  -7   3   0  113.39    4.67
  -7   3   0  114.46    5.01
   7  -3   0  126.39    5.03
   7  -3   0  117.15    5.08
   7  -3   0  122.91    5.07
  -6   3   0    1.70    0.72
   6  -3   0    1.88    0.78
   6  -3   0    2.15    0.70
  -6   3   0    1.56    0.66
  -6   3   0    3.03    0.88
  -6   3   0    3.08    0.77
   6  -3   0    2.62    0.74
   6  -3   0    2.64    0.90
  -6   3   0    3.72    0.67
   5  -3   0   -1.92    0.52
   5  -3   0   -1.90    0.56
  -5   3   0   -1.91    0.52
  -5   3   0   -1.40    0.41
  -5   3   0   -1.36    0.46
   5  -3   0   -0.94    0.48
   5  -3   0   -1.02    0.47
  -5   3   0   -0.28    0.37
   5  -3   0   -1.14    0.47
  -4   3   0   24.28    1.45
   4  -3   0   24.25    1.26
   4  -3   0   24.78    1.45
   4  -3   0   24.90    1.45
  -4   3   0   22.71    1.30
  -4   3   0   23.52    1.31
  -4   3   0   23.16    1.34
   4  -3   0   22.66    1.46
  -4   3   0   25.09    1.16
   3  -3   0  111.86    3.97
  -3   3   0  102.99    3.94
  -3   3   0  105.82    3.70
   3  -3   0  101.21    3.95
  -3   3   0  104.29    3.76
   3  -3   0  102.44    3.69
  -3   3   0  106.57    3.89
   3  -3   0  105.91    3.93
   3  -3   0  103.95    3.95
  -3   3   0  103.60    3.76
  -2   3   0 2179.46   70.66
   2  -3   0 2072.64   70.69
   2  -3   0 2114.21   70.95
   2  -3   0 2137.82   68.77
  -2   3   0 2129.00   70.85
  -2   3   0 2158.19   68.70
  -2   3   0 2159.61   68.74
   2  -3   0 2193.54   70.90
  -1   3   0  343.02   11.40
  -1   3   0  344.69   11.42
  -1   3   0  343.53   11.74
   1  -3   0  344.89   11.81
   1  -3   0  353.67   11.79
  -1   3   0  363.98   11.77
   1  -3   0  365.99   11.76
   1  -3   0  338.25   11.77
   0  -3   0  818.03   27.55
   0   3   0  820.50   28.09
   0  -3   0  831.05   27.44
   0  -3   0  840.78   27.30
   0  -3   0  817.00   27.48
   0  -3   0  797.03   27.36
   0   3   0  818.57   27.23
   1   3   0  815.29   26.72
  -1  -3   0  795.95   26.74
   1   3   0  816.28   26.45
  -1  -3   0  785.94   26.53
  -1  -3   0  821.77   26.60
  -1  -3   0  800.72   26.45
   1   3   0  772.96   25.90
   1   3   0  817.38   25.97
  -1  -3   0  765.77   26.59
  -1  -3   0  775.22   26.53
  -2  -3   0  203.33    6.60
   2   3   0  186.35    6.32
  -2  -3   0  191.82    6.52
  -2  -3   0  183.74    6.56
  -2  -3   0  183.30    6.55
  -2  -3   0  187.50    6.75
   2   3   0  188.40    6.55
   2   3   0  190.66    6.50
   2   3   0  188.49    6.28
  -3  -3   0   24.41    1.31
  -3  -3   0   24.29    1.31
   3   3   0   23.51    1.21
  -3  -3   0   24.06    1.34
   3   3   0   25.38    1.25
   3   3   0   25.24    1.18
  -3  -3   0   24.91    1.34
  -3  -3   0   25.26    1.04
  -3  -3   0   26.06    1.48
   3   3   0   25.10    1.36
  -4  -3   0   27.28    1.47
   4   3   0   26.19    1.47
  -4  -3   0   23.37    1.41
  -4  -3   0   26.34    1.60
  -4  -3   0   25.79    1.45
  -4  -3   0   26.83    1.46
   4   3   0   28.25    1.32
  -4  -3   0   25.08    1.16
   4   3   0   27.01    1.37
   4   3   0   24.57    1.33
  -5  -3   0   33.97    2.00
   5   3   0   34.42    1.70
   5   3   0   36.05    1.78
   5   3   0   35.18    1.94
  -5  -3   0   32.96    1.84
  -5  -3   0   36.11    1.92
   5   3   0   36.05    1.82
  -5  -3   0   36.59    1.93
  -5  -3   0   31.05    1.86
  -6  -3   0   19.64    1.65
  -6  -3   0   22.86    1.64
   6   3   0   20.52    1.39
  -6  -3   0   20.25    1.62
   6   3   0   22.07    1.53
   6   3   0   21.71    1.51
   6   3   0   21.11    1.63
  -6  -3   0   23.70    1.61
  -6  -3   0   19.89    1.54
  -7  -3   0    2.84    1.01
  -7  -3   0    3.57    0.95
  -7  -3   0    2.96    1.02
   7   3   0    2.37    0.76
   7   3   0    2.35    0.84
   7   3   0    1.27    0.94
  -7  -3   0    1.25    0.58
  -8  -3   0  152.83    6.30
   8   3   0  142.87    5.93
   8   3   0  152.54    6.34
  -8  -3   0  150.83    6.44
  -8  -3   0  152.57    6.31
   9   3   0    1.88    1.11
  -9  -3   0    0.59    1.00
   9   3   0   -0.07    0.83
  -9  -3   0    1.02    1.01
  -9  -3   0    0.63    0.97
  10   3   0    1.64    1.00
 -10  -3   0    0.88    1.06
 -10  -3   0    1.82    1.22
 -11  -3   0    0.12    1.19
 -12  -3   0    2.48    1.49
 -13  -3   0    3.89    1.69
  13  -4   0    0.62    1.83
  12  -4   0    1.64    1.61
 -11   4   0    4.66    1.61
  11  -4   0    4.33    1.72
  10  -4   0    5.51    1.55
 -10   4   0    5.54    1.16
 -10   4   0    5.90    1.53
  -9   4   0   24.25    1.80
  -9   4   0   26.79    2.38
  -9   4   0   27.15    2.04
   9  -4   0   24.21    2.36
   9  -4   0   21.60    2.18
  -8   4   0   33.02    1.96
   8  -4   0   32.44    2.46
   8  -4   0   33.65    2.40
  -8   4   0   35.88    2.16
  -8   4   0   32.33    2.42
   7  -4   0  112.39    5.06
  -7   4   0  119.43    4.76
  -7   4   0  113.56    4.85
   7  -4   0  119.47    5.00
  -7   4   0  119.37    4.59
   7  -4   0  114.66    5.04
   7  -4   0  119.36    4.66
  -7   4   0  112.63    4.68
  -7   4   0  117.18    5.03
   6  -4   0   27.13    1.89
   6  -4   0   27.05    1.97
   6  -4   0   23.04    1.78
  -6   4   0   29.04    1.96
  -6   4   0   28.79    1.48
  -6   4   0   28.97    1.81
   6  -4   0   26.53    1.65
  -6   4   0   24.79    1.67
  -6   4   0   24.43    1.79
   5  -4   0  240.24    8.88
   5  -4   0  246.93    8.38
  -5   4   0  246.81    8.52
  -5   4   0  243.68    8.48
  -5   4   0  238.74    8.47
  -5   4   0  242.65    8.74
   5  -4   0  254.42    8.86
   5  -4   0  243.88    8.89
  -5   4   0  238.95    8.82
  -4   4   0   59.38    2.19
  -4   4   0   55.04    2.42
  -4   4   0   55.85    2.59
   4  -4   0   58.22    2.33
   4  -4   0   59.54    2.63
   4  -4   0   58.03    2.62
   4  -4   0   59.89    2.59
  -4   4   0   57.38    2.43
  -4   4   0   57.48    2.51
   4  -4   0   58.31    2.64
  -3   4   0    0.50    0.43
   3  -4   0    0.97    0.47
   3  -4   0    0.49    0.37
   3  -4   0    2.73    0.54
   3  -4   0    0.70    0.32
   3  -4   0    0.53    0.41
  -3   4   0    0.81    0.37
  -3   4   0    0.95    0.39
  -3   4   0    0.91    0.36
   2  -4   0   11.15    0.82
  -2   4   0   11.11    0.73
  -2   4   0   14.86    0.89
  -1   4   0    1.77    0.26
   1  -4   0    1.65    0.33
   1  -4   0    1.16    0.31
  -1   4   0    1.53    0.33
   1  -4   0    0.90    0.31
  -1   4   0    1.56    0.26
   1  -4   0    1.26    0.29
   0  -4   0  181.91    6.35
   0  -4   0  183.54    6.45
   0   4   0  183.88    6.14
   0   4   0  183.01    6.35
   0  -4   0  189.22    6.34
   0   4   0  189.36    6.16
   0  -4   0  190.40    6.39
   0  -4   0  183.36    6.38
  -1  -4   0  257.22    8.70
  -1  -4   0  263.17    8.53
  -1  -4   0  236.77    8.49
  -1  -4   0  240.04    8.47
   1   4   0  253.59    8.47
  -1  -4   0  240.73    8.46
  -1  -4   0  256.77    8.45
   1   4   0  255.41    8.21
   1   4   0  240.49    8.16
  -2  -4   0  175.05    6.63
  -2  -4   0  173.96    6.43
  -2  -4   0  188.63    6.38
   2   4   0  170.50    6.16
  -2  -4   0  186.68    6.43
   2   4   0  189.45    6.14
   2   4   0  188.80    6.44
  -2  -4   0  197.18    6.47
   3   4   0   22.35    1.11
  -3  -4   0   22.81    1.30
  -3  -4   0   22.18    1.27
   3   4   0   21.44    1.17
  -3  -4   0   20.47    1.41
   3   4   0   21.07    1.32
  -3  -4   0   19.34    1.24
  -3  -4   0   21.04    1.33
  -4  -4   0    7.93    0.82
   4   4   0    7.20    0.74
  -4  -4   0    7.85    0.82
  -5  -4   0   -0.85    0.41
   5   4   0   -0.94    0.43
   5   4   0   -0.38    0.51
  -5  -4   0    0.62    0.69
  -5  -4   0   -0.53    0.56
  -5  -4   0   -0.84    0.43
  -5  -4   0   -0.59    0.50
   5   4   0   -0.46    0.37
   6   4   0   87.65    3.42
  -6  -4   0   76.06    3.59
  -6  -4   0   79.88    3.62
  -6  -4   0   77.36    3.79
  -6  -4   0   85.72    3.69
   6   4   0   77.08    3.45
   6   4   0   83.03    3.68
  -6  -4   0   85.06    3.61
  -7  -4   0   28.36    2.22
  -7  -4   0   29.38    2.14
   7   4   0   30.84    1.96
  -7  -4   0   29.87    2.09
   7   4   0   32.28    2.22
  -7  -4   0   36.02    2.23
   7   4   0   32.88    1.95
  -8  -4   0   39.17    2.72
   8   4   0   40.83    2.44
   8   4   0   38.42    2.63
  -8  -4   0   38.20    2.61
  -8  -4   0   37.71    2.53
  -9  -4   0    1.63    1.07
   9   4   0    1.65    0.94
  -9  -4   0    1.23    1.04
 -10  -4   0    1.05    1.14
  10   4   0    4.58    1.18
 -10  -4   0    4.71    1.30
 -11  -4   0    0.40    1.09
 -11  -4   0   -0.28    1.12
 -12  -4   0    0.20    1.36
  13  -5   0   -1.98    1.56
  12  -5   0    1.95    1.66
  11  -5   0    4.62    1.70
 -10   5   0    5.15    1.47
  10  -5   0    4.57    1.54
  10  -5   0    1.69    1.20
  -9   5   0    0.49    0.86
   9  -5   0   -0.97    0.94
  -9   5   0   -0.55    0.76
  -9   5   0    0.78    1.08
   9  -5   0   -1.60    1.05
  -8   5   0    1.23    0.69
  -8   5   0   -0.78    0.73
   8  -5   0   -0.73    0.87
  -8   5   0    0.67    1.00
   8  -5   0    0.72    1.11
   7  -5   0   36.09    2.51
  -7   5   0   32.97    1.76
  -7   5   0   35.90    2.39
   7  -5   0   32.72    2.35
  -7   5   0   35.43    2.14
  -6   5   0   80.64    3.38
   6  -5   0   76.03    3.64
  -6   5   0   74.81    3.32
   6  -5   0   81.68    3.56
  -6   5   0   76.50    3.38
  -6   5   0   78.58    3.59
  -6   5   0   78.79    2.99
   6  -5   0   74.79    3.57
   6  -5   0   64.90    3.42
   5  -5   0    4.71    0.87
  -5   5   0    5.35    0.79
  -5   5   0    5.62    0.81
  -5   5   0    4.67    0.86
  -5   5   0    4.99    0.77
   5  -5   0    4.18    0.90
   5  -5   0    5.36    0.86
   5  -5   0    4.81    0.82
   4  -5   0   58.10    2.71
   4  -5   0   58.78    2.71
   4  -5   0   60.81    2.71
   4  -5   0   62.87    2.73
  -4   5   0   59.93    2.57
  -4   5   0   60.64    2.56
  -4   5   0   60.85    2.74
  -3   5   0  542.12   17.90
   3  -5   0  517.14   17.96
   3  -5   0  548.78   17.97
  -3   5   0  510.09   17.31
   3  -5   0  513.05   17.89
  -3   5   0  538.31   17.33
   1  -5   0  448.65   14.42
  -1   5   0  433.79   14.43
   1  -5   0  419.74   14.50
   1  -5   0  447.11   14.51
  -1   5   0  417.89   13.99
  -1   5   0  429.37   13.97
   1  -5   0  405.91   14.41
   0  -5   0  245.24    8.54
   0   5   0  249.42    8.57
   0   5   0  257.91    8.27
   0  -5   0  255.12    8.53
   0   5   0  253.71    8.29
   0  -5   0  249.33    8.69
   0  -5   0  252.52    8.61
   0  -5   0  246.97    8.61
   1   5   0   -0.02    0.23
  -1  -5   0    0.34    0.36
  -1  -5   0   -0.50    0.27
  -1  -5   0   -0.66    0.46
  -1  -5   0    0.04    0.33
   1   5   0   -0.35    0.25
   1   5   0    0.50    0.35
  -1  -5   0    0.15    0.34
  -1  -5   0    0.34    0.33
   2   5   0   90.84    3.41
  -2  -5   0   94.05    3.38
  -2  -5   0   95.07    3.44
  -2  -5   0   89.36    3.42
   2   5   0   88.61    3.24
  -2  -5   0   93.36    3.33
   2   5   0   89.06    3.17
  -2  -5   0   80.82    3.58
  -3  -5   0  113.10    4.47
   3   5   0  118.75    4.21
  -3  -5   0  119.08    4.45
   3   5   0  118.40    4.30
  -3  -5   0  124.12    4.41
  -3  -5   0  121.18    4.77
   3   5   0  117.96    4.47
  -3  -5   0  126.40    4.53
   4   5   0   16.22    1.24
  -4  -5   0   15.36    1.18
   4   5   0   15.85    1.14
  -4  -5   0   15.25    1.19
   4   5   0   15.24    1.00
  -4  -5   0   14.34    1.17
  -4  -5   0   14.20    1.17
  -4  -5   0   14.08    1.09
  -4  -5   0   14.71    1.30
  -5  -5   0   50.57    2.51
   5   5   0   50.46    2.48
  -5  -5   0   51.71    2.72
   5   5   0   51.53    2.27
   5   5   0   49.51    2.34
  -5  -5   0   51.08    2.52
  -5  -5   0   47.71    2.43
  -6  -5   0   51.77    2.63
  -6  -5   0   46.97    2.54
   6   5   0   49.33    2.36
  -6  -5   0   46.61    2.55
   6   5   0   49.48    2.60
  -6  -5   0   49.09    2.80
   6   5   0   47.12    2.42
  -7  -5   0   -1.12    0.74
  -7  -5   0    0.41    0.75
   7   5   0   -0.43    0.67
  -7  -5   0   -0.66    0.85
   8   5   0    3.02    0.97
  -8  -5   0    3.37    1.03
  -8  -5   0    3.82    1.36
  -8  -5   0    3.50    1.08
   9   5   0    4.78    1.12
  -9  -5   0    7.25    1.38
  -9  -5   0    7.60    1.32
 -10  -5   0    2.10    1.17
  10   5   0    2.52    1.15
 -10  -5   0    0.68    1.12
 -11  -5   0   -0.11    1.10
 -11  -5   0    0.32    1.24
 -12  -5   0    0.86    1.37
  12  -6   0    2.64    1.73
  11  -6   0    0.58    1.51
  10  -6   0    6.99    1.72
  10  -6   0    6.81    1.60
   9  -6   0    0.29    1.18
   9  -6   0   -1.11    0.97
  -9   6   0   -0.39    0.84
  -8   6   0    3.28    1.27
  -8   6   0    1.25    0.96
   8  -6   0    1.40    1.16
   8  -6   0    1.32    1.22
   7  -6   0    8.49    1.34
  -7   6   0    8.46    0.77
  -7   6   0    6.19    1.14
   7  -6   0    4.12    1.23
  -7   6   0    4.85    1.24
   6  -6   0    1.23    0.83
  -6   6   0    1.46    0.88
   6  -6   0    0.91    0.91
  -6   6   0    1.68    0.93
  -6   6   0    1.09    0.81
   6  -6   0    0.92    0.95
  -5   6   0   42.04    2.14
   5  -6   0   39.51    2.31
  -5   6   0   45.90    2.33
  -5   6   0   39.12    2.09
   5  -6   0   41.96    2.27
   5  -6   0   42.11    2.30
   5  -6   0   43.22    2.27
  -4   6   0   -0.19    0.48
  -4   6   0    0.62    0.51
   4  -6   0   -0.07    0.21
   4  -6   0   -0.26    0.50
   4  -6   0   -0.18    0.59
   4  -6   0   -0.32    0.53
  -4   6   0   -0.09    0.52
   3  -6   0  816.73   26.53
   3  -6   0  757.88   26.51
   3  -6   0  758.56   26.37
  -3   6   0  784.22   25.59
   3  -6   0  814.45   26.39
  -3   6   0  812.47   26.43
  -3   6   0  763.14   25.59
  -2   6   0   32.07    1.50
   2  -6   0   35.82    1.66
   2  -6   0   30.11    1.63
  -1   6   0    4.28    0.56
   1  -6   0    3.75    0.55
   1  -6   0    3.86    0.55
  -1   6   0    3.39    0.47
   1  -6   0    3.78    0.56
  -1   6   0    3.42    0.48
   1  -6   0    3.44    0.54
   0  -6   0    3.69    0.51
   0   6   0    3.52    0.52
   0  -6   0    2.39    0.43
   0   6   0    3.18    0.39
   0   6   0    3.74    0.43
   0  -6   0    3.56    0.47
   0  -6   0    2.51    0.48
   0  -6   0    2.71    0.51
  -1  -6   0   46.13    2.02
  -1  -6   0   49.26    1.92
  -1  -6   0   44.55    1.92
   1   6   0   48.34    1.90
   1   6   0   51.67    2.04
   1   6   0   48.67    1.83
  -1  -6   0   48.77    2.04
  -1  -6   0   47.48    2.18
  -2  -6   0  174.85    6.08
  -2  -6   0  167.41    6.29
   2   6   0  170.32    5.79
  -2  -6   0  173.14    5.90
   2   6   0  168.33    6.01
  -2  -6   0  161.95    5.91
   2   6   0  167.24    5.70
  -2  -6   0  161.85    6.02
  -3  -6   0   30.89    1.57
   3   6   0   31.86    1.55
  -3  -6   0   31.04    1.87
   3   6   0   30.85    1.45
  -3  -6   0   29.96    1.65
   3   6   0   32.58    1.68
  -3  -6   0   31.39    1.59
  -3  -6   0   33.03    1.69
   4   6   0    2.85    0.53
  -4  -6   0    2.46    0.64
  -4  -6   0    1.50    0.62
  -4  -6   0    1.24    0.58
   4   6   0    3.07    0.62
  -4  -6   0    2.25    0.58
  -4  -6   0    3.66    0.85
  -4  -6   0    2.25    0.62
   4   6   0    2.26    0.66
  -5  -6   0   11.63    1.40
   5   6   0    9.69    1.06
  -5  -6   0   12.39    1.17
  -5  -6   0   11.44    1.20
   5   6   0   11.07    1.16
  -5  -6   0   11.76    1.18
   5   6   0   12.53    1.06
  -5  -6   0   11.42    1.15
  -6  -6   0    8.77    1.16
  -6  -6   0   10.98    1.24
   6   6   0    9.39    1.13
  -6  -6   0    9.58    1.24
   6   6   0   10.01    1.06
  -6  -6   0    8.37    1.38
  -7  -6   0    0.88    0.96
   7   6   0    0.80    0.78
  -7  -6   0    0.63    0.83
  -7  -6   0    1.65    1.07
  -8  -6   0    2.30    1.00
  -8  -6   0    0.26    0.83
   8   6   0    0.87    0.78
   9   6   0    6.07    1.25
  -9  -6   0    6.57    1.35
  -9  -6   0    7.20    1.36
 -10  -6   0    2.25    1.28
  10   6   0    2.65    1.17
 -10  -6   0    1.88    1.30
 -11  -6   0   15.80    2.13
 -11  -6   0   15.82    2.15
  12  -7   0    0.71    1.64
  11  -7   0    7.18    1.87
  10  -7   0   30.15    2.76
  10  -7   0   25.21    2.61
   9  -7   0    3.45    1.42
  -9   7   0    4.68    1.21
   9  -7   0    3.87    1.44
   8  -7   0   -2.90    0.91
  -8   7   0   -2.50    0.85
   8  -7   0   -2.32    1.06
  -7   7   0   26.49    2.04
   7  -7   0   22.82    2.32
   7  -7   0   25.99    2.26
   6  -7   0   22.21    2.10
  -6   7   0   24.76    1.85
   6  -7   0   31.80    2.17
   6  -7   0   28.38    2.10
  -5   7   0    0.44    0.67
   5  -7   0    0.13    0.29
  -5   7   0    0.87    0.67
   5  -7   0    1.10    0.75
  -5   7   0    0.60    0.60
   5  -7   0    0.56    0.74
   5  -7   0    0.57    0.66
   4  -7   0   18.59    1.41
   4  -7   0   18.13    1.46
   4  -7   0   19.29    1.47
  -4   7   0   19.98    1.33
  -4   7   0   18.57    1.32
   4  -7   0   17.13    1.42
  -4   7   0   19.57    1.48
   3  -7   0   22.51    1.49
  -3   7   0   20.81    1.41
   3  -7   0   21.73    1.35
  -3   7   0   22.31    1.28
  -3   7   0   19.93    1.27
   3  -7   0   18.95    1.37
   3  -7   0   22.39    1.44
  -2   7   0   96.99    3.60
   2  -7   0   89.97    3.78
   2  -7   0   89.70    3.67
   2  -7   0  101.27    3.70
   2  -7   0  101.74    3.85
  -2   7   0   96.63    3.58
  -2   7   0   99.69    3.77
   1  -7   0   98.84    3.87
  -1   7   0  105.98    3.87
   1  -7   0  105.70    3.75
   1  -7   0  102.83    3.89
  -1   7   0   98.02    3.67
   1  -7   0   93.76    3.71
  -1   7   0  104.47    3.65
   0  -7   0   -0.29    0.41
   0  -7   0   -0.90    0.36
   0  -7   0   -0.42    0.41
   0   7   0   -0.05    0.35
   0  -7   0    0.15    0.37
   0  -7   0   -0.36    0.40
   0   7   0   -0.58    0.38
   0   7   0   -0.32    0.32
  -1  -7   0   18.82    1.01
  -1  -7   0   17.65    1.25
   1   7   0   16.09    1.00
  -1  -7   0   18.40    1.16
  -1  -7   0   16.80    0.98
   1   7   0   19.65    1.19
   1   7   0   18.58    0.98
  -1  -7   0   18.34    1.17
   2   7   0   16.07    1.03
   2   7   0   19.70    1.22
  -2  -7   0   16.12    1.01
  -2  -7   0   16.20    1.30
  -2  -7   0   17.55    1.19
   2   7   0   16.51    0.96
  -2  -7   0   17.24    1.16
  -2  -7   0   16.44    0.97
  -3  -7   0    0.01    0.48
  -3  -7   0    0.30    0.38
  -3  -7   0   -0.73    0.55
  -3  -7   0    0.26    0.45
   3   7   0    0.69    0.48
   3   7   0    0.51    0.37
  -3  -7   0   -0.58    0.41
   3   7   0    0.36    0.44
  -4  -7   0   22.62    1.51
  -4  -7   0   21.12    1.68
  -4  -7   0   21.63    1.39
  -4  -7   0   19.74    1.36
   4   7   0   19.03    1.35
  -4  -7   0   19.03    1.44
   4   7   0   20.84    1.25
  -5  -7   0   43.49    2.63
   5   7   0   39.89    2.21
   5   7   0   43.23    2.12
  -5  -7   0   44.70    2.28
  -5  -7   0   45.08    2.21
  -5  -7   0   41.83    2.37
  -5  -7   0   46.14    2.45
  -6  -7   0   11.48    1.31
  -6  -7   0   11.00    1.38
  -6  -7   0    9.63    1.29
  -6  -7   0   10.73    1.52
   6   7   0   11.46    1.28
  -7  -7   0   12.22    1.47
  -7  -7   0    9.28    1.58
  -7  -7   0   10.70    1.42
   7   7   0   10.38    1.32
  -8  -7   0    1.49    0.99
   8   7   0   -0.25    0.74
  -8  -7   0   -0.11    0.83
  -9  -7   0    1.34    1.13
   9   7   0    0.28    0.87
  -9  -7   0    0.35    0.97
 -10  -7   0    8.31    1.66
 -10  -7   0    4.78    1.41
  10   7   0    8.43    1.49
 -11  -7   0    0.47    1.32
  11   7   0    2.66    1.24
 -11  -7   0    0.97    1.32
  11  -8   0   22.59    2.64
  10  -8   0   13.51    2.14
  10  -8   0   12.40    2.04
  -9   8   0   17.92    1.88
   9  -8   0   19.59    2.23
   9  -8   0   18.53    2.18
   8  -8   0   -2.81    1.00
  -8   8   0   -1.89    0.93
   8  -8   0   -2.79    1.10
   7  -8   0    4.62    1.35
  -7   8   0    7.42    1.28
   7  -8   0    5.49    1.34
   6  -8   0   -3.28    0.86
   5  -8   0   -0.56    0.74
   5  -8   0    0.01    0.66
  -5   8   0    0.24    0.71
  -5   8   0   -0.44    0.64
   5  -8   0   -1.00    0.70
   4  -8   0    7.88    1.01
   4  -8   0    8.98    1.02
   4  -8   0   10.02    1.13
  -4   8   0    6.61    0.94
   4  -8   0   10.22    1.11
  -4   8   0    8.81    0.96
   3  -8   0   14.73    1.16
   3  -8   0   12.86    1.21
  -3   8   0   13.74    1.13
   3  -8   0   16.99    1.32
   3  -8   0   14.76    1.32
  -3   8   0   15.74    1.16
   2  -8   0   18.33    1.32
   2  -8   0   16.06    1.30
   2  -8   0   15.23    1.18
  -2   8   0   16.62    1.15
  -2   8   0   16.31    1.15
   2  -8   0   16.78    1.12
  -1   8   0    0.54    0.46
  -1   8   0    1.91    0.54
   1  -8   0    0.81    0.54
  -1   8   0    1.62    0.50
   1  -8   0    1.28    0.49
   1  -8   0    1.18    0.58
   1  -8   0    1.16    0.45
   0   8   0    0.44    0.50
   0   8   0    0.08    0.45
   0  -8   0    0.53    0.59
   0  -8   0    0.15    0.48
   0  -8   0    1.95    0.58
   0  -8   0   -0.71    0.53
  -1  -8   0   12.79    1.13
  -1  -8   0   12.67    0.86
  -1  -8   0   13.85    1.19
  -1  -8   0   15.41    1.22
   1   8   0   12.62    0.94
   1   8   0   14.74    1.05
   1   8   0   15.56    1.02
  -2  -8   0   55.89    2.55
  -2  -8   0   55.92    2.25
   2   8   0   61.83    2.45
  -2  -8   0   55.16    2.75
  -2  -8   0   56.15    2.55
   2   8   0   53.11    2.27
  -3  -8   0    0.42    0.56
   3   8   0   -0.40    0.46
  -3  -8   0    0.04    0.41
  -3  -8   0    0.15    0.72
  -3  -8   0   -0.08    0.54
   3   8   0    0.06    0.42
  -3  -8   0   -0.34    0.48
  -4  -8   0   11.01    1.15
   4   8   0   11.60    0.98
  -4  -8   0   11.22    1.16
  -4  -8   0   11.36    1.09
  -4  -8   0   11.46    1.39
  -4  -8   0   10.66    0.93
   4   8   0   10.20    1.06
  -5  -8   0   10.38    1.25
   5   8   0    9.34    1.01
  -5  -8   0   11.04    1.29
  -5  -8   0   11.23    1.13
  -5  -8   0   11.25    1.51
   5   8   0    7.96    1.09
  -6  -8   0   20.89    1.88
  -6  -8   0   19.17    1.83
   6   8   0   17.20    1.62
  -6  -8   0   22.84    2.04
  -7  -8   0    0.69    0.88
   7   8   0    1.20    0.84
  -7  -8   0    0.33    0.85
  -8  -8   0    1.76    1.07
  -8  -8   0    0.40    0.93
   8   8   0    1.29    0.91
  -9  -8   0   -1.10    1.04
   9   8   0    0.54    0.93
  -9  -8   0    0.04    0.94
 -10  -8   0   -0.16    1.01
 -10  -8   0   -0.57    1.11
  10   8   0   -0.39    0.96
  11  -9   0    0.37    1.56
  10  -9   0    9.90    1.97
  10  -9   0   15.97    2.29
  -9   9   0    1.05    1.06
   9  -9   0    1.52    1.34
   9  -9   0    1.58    1.36
  -8   9   0   -0.35    0.95
   8  -9   0   -0.21    1.13
   8  -9   0    0.16    1.15
   7  -9   0    4.15    1.29
  -7   9   0    4.56    1.20
   7  -9   0    4.98    1.32
   6  -9   0   23.52    2.07
   6  -9   0   22.47    2.09
  -6   9   0   27.76    1.98
   5  -9   0    6.43    1.10
   5  -9   0    3.86    1.01
   5  -9   0    4.75    1.01
  -5   9   0    4.42    0.96
   4  -9   0    0.83    0.75
   4  -9   0    1.64    0.76
   4  -9   0    1.39    0.78
  -4   9   0    1.45    0.70
  -4   9   0    1.42    0.74
   3  -9   0    8.38    1.11
   3  -9   0    9.46    0.97
  -3   9   0   10.51    1.03
   3  -9   0   10.03    1.11
  -3   9   0    9.16    1.01
   3  -9   0    7.77    0.96
  -2   9   0    4.94    0.78
   2  -9   0    5.58    0.90
   2  -9   0    9.71    1.05
   1  -9   0    6.34    0.98
  -1   9   0    6.31    0.89
  -1   9   0    8.07    0.88
   1  -9   0    8.76    1.04
   0   9   0   -0.85    0.60
   0  -9   0    0.39    0.73
   0   9   0   -1.26    0.58
   0  -9   0   -1.28    0.71
  -1  -9   0    2.54    0.85
   1   9   0    1.03    0.66
   1   9   0    2.10    0.62
  -1  -9   0    2.10    0.75
  -1  -9   0    2.42    0.76
   2   9   0    8.38    0.85
   3   9   0   -0.78    0.44
  -3  -9   0   -0.69    0.59
   3   9   0   -0.20    0.54
  -3  -9   0   -0.50    0.55
  -3  -9   0   -1.05    0.43
  -3  -9   0   -0.53    0.63
  -4  -9   0   14.48    1.13
  -4  -9   0   15.54    1.42
   4   9   0   13.89    1.35
  -4  -9   0   16.31    1.63
   4   9   0   13.78    1.16
  -4  -9   0   16.05    1.12
  -4  -9   0   15.93    1.49
  -5  -9   0    1.96    1.06
  -5  -9   0    0.01    0.75
  -5  -9   0    1.02    0.72
  -5  -9   0    0.89    0.82
  -5  -9   0    1.33    0.88
   5   9   0    1.58    0.77
  -6  -9   0    3.18    1.04
   6   9   0    2.94    0.93
  -6  -9   0    3.91    0.94
  -7  -9   0   -0.18    0.81
   7   9   0    0.02    0.82
  -7  -9   0   -0.10    0.80
  -8  -9   0   -0.49    0.92
   8   9   0    0.22    0.91
  -8  -9   0   -0.23    0.96
   9   9   0   -0.46    0.95
  -9  -9   0    1.49    1.23
  -9  -9   0    0.78    1.23
  10 -10   0   -2.08    1.36
  10 -10   0    1.62    1.48
  -9  10   0    1.28    1.18
   9 -10   0    2.77    1.44
   9 -10   0    3.66    1.57
   8 -10   0   21.96    2.33
  -8  10   0   24.72    2.26
   8 -10   0   25.98    2.48
   7 -10   0   13.67    1.81
   7 -10   0   13.74    1.72
  -7  10   0   14.64    1.67
   6 -10   0    2.16    1.00
   6 -10   0   -0.02    0.98
  -6  10   0    0.97    0.90
   5 -10   0   -0.76    0.75
   5 -10   0   -1.33    0.75
  -5  10   0   -0.35    0.75
  -4  10   0    6.02    0.97
   4 -10   0    7.11    1.14
   4 -10   0    6.14    0.94
   4 -10   0    5.48    1.09
  -3  10   0   12.88    1.25
   3 -10   0   11.51    1.32
   3 -10   0   13.00    1.33
  -3  10   0   13.31    1.20
   3 -10   0   13.96    1.17
   2 -10   0    8.93    1.12
   2 -10   0   11.99    1.23
  -2  10   0    8.53    0.98
   1 -10   0    5.02    0.97
  -1  10   0    3.82    0.82
   1 -10   0    4.90    0.91
  -1  10   0    4.96    0.77
   0  10   0   14.74    1.26
   0 -10   0   18.95    1.57
   0 -10   0   13.49    1.35
   0  10   0   16.67    1.24
  -1 -10   0   37.42    2.08
   1  10   0   33.07    1.86
  -1 -10   0   35.65    2.02
   1  10   0   34.28    1.77
  -2 -10   0   15.05    1.42
   2  10   0   12.95    1.13
   2  10   0   12.56    1.21
  -2 -10   0   13.91    1.45
  -2 -10   0   13.82    1.31
   3  10   0   -0.38    0.50
  -3 -10   0   -0.11    0.62
  -3 -10   0   -0.62    0.65
  -3 -10   0   -0.21    0.78
   3  10   0    0.06    0.59
   4  10   0    2.59    0.79
  -4 -10   0    1.72    0.80
  -4 -10   0    0.60    0.92
  -4 -10   0    1.79    0.80
   5  10   0    5.85    1.07
  -5 -10   0    8.35    1.44
  -5 -10   0    8.14    1.31
  -6 -10   0   -1.22    0.68
  -6 -10   0    0.45    0.90
   6  10   0   -0.40    0.78
  -7 -10   0    1.53    1.06
  -7 -10   0    2.00    0.94
   7  10   0    1.82    1.00
  -8 -10   0    1.70    1.29
  -8 -10   0    2.58    1.18
   8  10   0    2.45    1.22
   9 -11   0    1.62    1.32
   9 -11   0   -0.17    1.36
  -9  11   0   -0.05    1.06
   8 -11   0    0.78    1.20
  -8  11   0   -1.24    0.94
   8 -11   0    0.91    1.21
   7 -11   0    6.40    1.33
  -7  11   0    6.17    1.36
   7 -11   0    4.04    1.38
  -6  11   0   -1.32    0.80
   6 -11   0    0.69    0.99
   6 -11   0    1.16    0.95
  -5  11   0    0.75    0.88
   5 -11   0   -0.23    0.81
   5 -11   0    0.57    0.92
  -4  11   0    0.98    0.77
   4 -11   0    1.25    0.68
   4 -11   0    1.83    0.91
   3 -11   0    0.40    0.76
  -3  11   0   -0.56    0.67
   3 -11   0   -0.26    0.80
  -2  11   0    0.52    0.63
   2 -11   0   -0.51    0.82
  -2  11   0    0.71    0.64
   2 -11   0    0.99    0.74
   1 -11   0    1.03    0.78
  -1  11   0    0.79    0.69
   1 -11   0    0.06    0.69
  -1  11   0    0.84    0.61
   0  11   0   12.70    1.19
   0 -11   0   13.55    1.31
   0 -11   0   12.78    1.26
   0  11   0   11.73    1.14
   1  11   0   15.14    1.33
   1  11   0   16.08    1.24
  -1 -11   0   18.48    1.58
  -1 -11   0   16.27    1.46
  -2 -11   0   11.34    1.25
   2  11   0   11.45    1.20
   2  11   0   11.17    1.06
  -2 -11   0   11.86    1.28
  -3 -11   0    1.56    0.85
  -3 -11   0    1.33    0.81
   3  11   0    0.86    0.70
   4  11   0    1.32    0.78
   4  11   0    2.72    0.83
  -4 -11   0    0.94    0.78
   5  11   0   -0.58    0.68
  -5 -11   0   -0.20    0.85
  -6 -11   0    3.03    1.17
   6  11   0    2.68    1.04
   7  11   0    6.38    1.43
  -7 -11   0    5.34    1.38
  -8  12   0    0.00    1.00
   8 -12   0    1.08    1.13
   8 -12   0   -0.97    1.09
   7 -12   0   -0.49    1.11
   7 -12   0   -0.44    0.99
  -7  12   0   -0.49    1.02
   6 -12   0   -0.66    0.83
  -6  12   0   -0.88    0.82
   6 -12   0    0.52    1.03
  -5  12   0   -0.02    0.84
   5 -12   0   -0.54    0.90
   5 -12   0   -0.23    0.67
   4 -12   0    1.51    0.94
  -4  12   0    2.05    0.92
  -3  12   0    0.25    0.74
   3 -12   0   -0.50    0.79
  -2  12   0    1.66    0.80
   2 -12   0    2.55    0.92
  -1  12   0    0.91    0.72
   1 -12   0    1.55    0.88
   1 -12   0   -0.27    0.73
   0  12   0    1.52    0.76
   0 -12   0    1.20    0.86
   0 -12   0    2.51    0.85
   1  12   0    2.01    0.77
  -1 -12   0    2.65    0.91
  -1 -12   0    1.75    0.83
  -2 -12   0    5.42    1.11
  -2 -12   0    5.30    1.09
   2  12   0    5.94    1.03
   3  12   0    1.59    0.84
  -3 -12   0    2.74    0.93
  -4 -12   0   -1.52    0.73
   4  12   0   -0.29    0.69
   5  12   0   -0.10    0.79
  -5 -12   0    0.42    0.89
   5  12   0   -0.71    0.71
  -6 -12   0    1.26    1.07
   6  12   0    0.59    0.93
   6  12   0   -0.30    0.90
   6 -13   0   -0.37    0.75
  -6  13   0    1.02    1.00
   6 -13   0   -0.19    1.05
  -5  13   0    1.42    1.00
   5 -13   0    1.11    1.03
   4 -13   0    1.68    1.01
  -4  13   0    1.74    0.94
   3 -13   0   -0.36    0.91
  -3  13   0    0.14    0.79
   2 -13   0    3.55    1.04
  -2  13   0    0.54    0.83
  -1  13   0    1.24    0.82
   1 -13   0    0.85    0.82
   0  13   0    0.01    0.76
   0 -13   0    0.12    0.75
   1  13   0   -0.12    0.75
  -1 -13   0    0.03    0.78
   2  13   0    1.58    0.83
  -2 -13   0    0.21    0.81
  -3 -13   0    0.24    0.84
   3  13   0    0.51    0.77
   4  13   0    1.70    0.90
  -4 -13   0    0.89    0.90
  -4 -13   0    0.93    1.00
   3 -14   0   -0.30    0.89
  -3  14   0   -1.09    0.80
   2 -14   0    0.07    0.88
  -2  14   0   -0.16    0.80
   1 -14   0   -0.45    0.81
  -1  14   0   -0.51    0.72
   0 -14   0    1.62    0.93
   0  14   0    0.91    0.82
   1  14   0    0.76    0.80
  -1 -14   0    0.87    0.87
  -2 -14  -1   -0.19    0.71
   2  14   1    1.50    0.76
  -1 -14  -1    0.25    0.79
   1  14   1    1.71    0.83
   0 -14  -1   -0.49    0.76
   0  14   1    1.36    0.79
   1 -14  -1    0.45    0.78
  -1  14   1    0.08    0.72
  -2  14   1    1.77    0.84
   2 -14  -1    1.43    0.88
   3 -14  -1    1.31    0.94
  -3  14   1    0.32    0.85
   4 -14  -1    0.03    0.90
  -4  14   1   -0.60    0.86
   5  13   1    0.00    0.78
  -5 -13  -1   -0.11    0.91
   5  13   1    0.09    0.79
   4  13   1    3.08    0.91
  -4 -13  -1    2.01    1.02
  -4 -13  -1    1.63    0.88
   3  13   1    0.22    0.70
  -3 -13  -1    0.14    0.77
   2  13   1    0.10    0.63
  -2 -13  -1    0.54    0.73
  -2 -13  -1   -0.47    0.66
   1  13   1   -0.30    0.61
  -1 -13  -1    0.14    0.68
  -1 -13  -1   -0.84    0.66
   0 -13  -1    0.04    0.67
   0  13   1    1.12    0.69
   0 -13  -1    0.67    0.85
   1 -13  -1   -0.54    0.67
  -1  13   1    0.18    0.62
   1 -13  -1    0.00    0.77
   2 -13  -1    0.57    0.84
  -2  13   1    0.48    0.75
  -3  13   1    3.63    0.99
   3 -13  -1    2.17    0.96
   4 -13  -1   -0.35    0.86
  -4  13   1    0.88    0.88
  -5  13   1    0.16    0.82
   5 -13  -1    0.00    0.93
  -6  13   1   -0.16    0.88
   6 -13  -1    0.77    1.08
   7 -13  -1   -0.21    0.80
   7 -13  -1   -0.78    1.05
  -7  13   1    0.62    1.06
  -7 -12  -1    0.09    1.00
  -6 -12  -1    2.10    1.02
   6  12   1    1.43    0.87
   5  12   1    0.51    0.75
  -5 -12  -1   -0.62    0.86
  -4 -12  -1   -0.13    0.87
   4  12   1   -0.94    0.64
  -4 -12  -1   -0.18    0.81
   3  12   1   -0.12    0.65
  -3 -12  -1    0.61    0.78
  -3 -12  -1    0.22    0.75
  -2 -12  -1    8.99    1.09
  -2 -12  -1    9.15    1.11
   2  12   1    7.45    0.98
   2  12   1    9.30    0.94
  -1 -12  -1    2.13    0.78
  -1 -12  -1    1.13    0.72
   1  12   1    2.75    0.62
   1  12   1    0.68    0.59
   0 -12  -1    1.62    0.84
   0 -12  -1    2.95    0.78
   0  12   1    2.54    0.64
   0  12   1    3.26    0.75
   1 -12  -1    2.56    0.78
   1 -12  -1    2.07    0.85
  -1  12   1    2.57    0.72
  -1  12   1    2.95    0.73
   2 -12  -1    4.34    1.06
  -2  12   1    2.98    0.74
  -2  12   1    2.77    0.74
   2 -12  -1    2.85    0.85
   3 -12  -1    0.75    0.77
   3 -12  -1   -0.07    0.84
  -3  12   1   -0.03    0.70
   4 -12  -1    7.55    1.27
  -4  12   1    8.32    1.20
   5 -12  -1   -0.28    0.63
   5 -12  -1    0.09    0.92
  -5  12   1    0.74    0.83
   6 -12  -1    3.60    1.25
   6 -12  -1    3.69    1.00
  -6  12   1    1.53    1.01
   7 -12  -1    6.28    1.51
  -7  12   1    5.44    1.34
   7 -12  -1    5.84    1.19
  -8  12   1    0.88    1.06
   8 -12  -1   -0.09    1.23
   8 -12  -1    0.48    1.03
  -8 -11  -1    0.56    1.14
   8  11   1   -0.51    1.01
  -7 -11  -1    4.66    1.21
   7  11   1    3.98    1.13
   6  11   1    2.71    0.92
  -6 -11  -1    2.77    1.01
  -5 -11  -1   -0.12    0.78
   5  11   1   -0.54    0.64
  -4 -11  -1    0.92    1.06
   4  11   1    0.09    0.50
  -4 -11  -1    1.14    0.74
  -4 -11  -1   -0.16    0.70
   4  11   1    1.10    0.69
  -4 -11  -1    2.11    0.78
  -3 -11  -1    0.89    0.71
   3  11   1    0.37    0.63
  -3 -11  -1    1.29    0.74
   3  11   1    1.08    0.56
   2  11   1    2.02    0.67
   2  11   1    1.18    0.53
  -2 -11  -1    0.10    0.63
  -2 -11  -1    2.08    0.74
  -1 -11  -1   11.66    1.13
   1  11   1   13.47    1.15
   1  11   1   11.23    1.00
  -1 -11  -1   14.01    1.31
   0  11   1   11.18    1.03
   0  11   1    9.74    0.97
   0 -11  -1   10.59    1.12
   0 -11  -1    9.67    1.05
   1 -11  -1   -0.10    0.73
  -1  11   1    0.42    0.59
  -1  11   1   -0.72    0.50
   1 -11  -1    0.17    0.67
   2 -11  -1    5.04    0.97
  -2  11   1    4.44    0.80
   2 -11  -1    5.85    0.92
  -2  11   1    4.31    0.82
   3 -11  -1    0.14    0.68
   3 -11  -1   -1.04    0.71
  -3  11   1    0.25    0.65
  -3  11   1   -1.08    0.57
  -4  11   1    1.13    0.74
   4 -11  -1   -0.41    0.85
   4 -11  -1    0.26    0.81
   4 -11  -1    1.68    0.63
  -5  11   1   -0.96    0.76
   5 -11  -1   -1.22    0.83
   5 -11  -1   -1.52    0.69
  -6  11   1    0.90    0.92
   6 -11  -1    1.00    0.90
   6 -11  -1    0.95    1.07
   7 -11  -1    9.87    1.49
   7 -11  -1    8.98    1.61
  -7  11   1   11.25    1.56
   8 -11  -1   -0.53    1.13
   8 -11  -1   -0.79    1.07
  -8  11   1    1.20    1.07
  -9  11   1   -1.10    0.90
   9 -11  -1    0.50    1.25
   9 -11  -1   -1.19    1.22
  -9 -10  -1    4.13    1.43
  -9 -10  -1    4.29    1.22
   9  10   1    4.42    1.36
   8  10   1    0.63    0.96
  -8 -10  -1    1.49    1.11
  -8 -10  -1    2.74    0.93
  -7 -10  -1    1.11    0.70
  -7 -10  -1   -0.10    0.85
   7  10   1    0.25    0.79
  -6 -10  -1    0.44    0.82
   6  10   1    0.19    0.70
  -5 -10  -1    0.87    0.99
   5  10   1    1.78    0.75
  -5 -10  -1    1.70    0.80
  -5 -10  -1    1.58    0.84
   4  10   1    6.12    0.78
  -4 -10  -1    7.04    1.00
  -4 -10  -1    6.68    1.04
  -4 -10  -1    5.66    0.94
  -4 -10  -1    5.46    1.23
   4  10   1    5.62    0.90
  -3 -10  -1   -0.31    0.54
  -3 -10  -1   -0.84    0.56
   3  10   1    0.08    0.52
  -3 -10  -1   -0.70    0.81
   3  10   1   -0.07    0.45
   2  10   1   44.20    1.99
   2  10   1   43.81    2.10
  -2 -10  -1   50.24    2.36
  -2 -10  -1   44.79    2.22
   1  10   1   56.49    2.31
  -1 -10  -1   56.30    2.53
  -1 -10  -1   58.36    2.60
   1  10   1   53.20    2.39
   0 -10  -1   49.37    2.35
   0 -10  -1   54.70    2.46
   0  10   1   47.17    2.19
   0  10   1   53.09    2.17
  -1  10   1    3.36    0.65
   1 -10  -1    3.12    0.74
  -1  10   1    2.76    0.66
   1 -10  -1    2.68    0.76
   2 -10  -1   40.19    2.12
   2 -10  -1   39.87    2.08
  -2  10   1   34.24    1.82
  -2  10   1   37.35    1.89
   3 -10  -1    1.72    0.52
   3 -10  -1    0.97    0.74
  -3  10   1    1.93    0.74
  -3  10   1    1.30    0.66
   3 -10  -1    1.35    0.74
   4 -10  -1    0.49    0.70
  -4  10   1   -0.01    0.64
   4 -10  -1   -0.43    0.68
  -4  10   1    0.71    0.74
   4 -10  -1    1.01    0.67
   5 -10  -1   -0.80    0.77
  -5  10   1   -1.15    0.65
   5 -10  -1   -0.38    0.75
   6 -10  -1    3.91    1.29
  -6  10   1    7.12    1.25
   6 -10  -1    4.93    1.19
  -7  10   1   -0.41    0.90
   7 -10  -1   -1.28    0.95
   7 -10  -1   -0.72    0.92
   8 -10  -1    1.12    1.21
  -8  10   1    0.28    1.00
   8 -10  -1    0.62    1.22
  -9  10   1    2.52    1.16
   9 -10  -1    4.65    1.58
   9 -10  -1    4.28    1.53
  10 -10  -1    3.88    1.69
  10 -10  -1    1.80    1.55
 -10  10   1    3.96    1.31
 -10  -9  -1    1.60    1.16
  10   9   1    0.43    1.06
 -10  -9  -1   -0.67    1.13
   9   9   1   -0.38    0.90
  -9  -9  -1   -0.53    1.00
  -9  -9  -1   -0.39    0.97
   8   9   1   -0.10    0.83
  -8  -9  -1    2.40    1.06
  -8  -9  -1    0.22    0.88
  -7  -9  -1    1.56    0.91
  -7  -9  -1    1.43    0.84
   7   9   1    2.15    0.87
  -6  -9  -1    6.82    1.44
  -6  -9  -1    4.73    0.87
  -6  -9  -1    4.40    1.05
   6   9   1    3.66    0.90
  -5  -9  -1    0.20    0.86
   5   9   1   -0.13    0.51
   5   9   1   -0.24    0.56
  -5  -9  -1   -0.70    0.52
  -5  -9  -1   -0.66    0.65
  -5  -9  -1   -0.08    0.60
   4   9   1   -0.03    0.51
  -4  -9  -1   -0.52    0.72
  -4  -9  -1    0.14    0.58
  -4  -9  -1   -0.80    0.54
   4   9   1   -0.10    0.39
  -4  -9  -1    0.14    0.56
   3   9   1   -0.65    0.40
  -3  -9  -1   -0.90    0.71
  -3  -9  -1   -0.18    0.54
  -3  -9  -1   -0.58    0.52
   3   9   1   -0.26    0.47
  -2  -9  -1   37.67    1.94
  -2  -9  -1   40.38    2.23
  -2  -9  -1   39.38    1.99
   2   9   1   38.54    1.84
   2   9   1   38.13    1.70
   1   9   1  221.18    7.67
  -1  -9  -1  215.42    7.99
  -1  -9  -1  241.37    8.07
   1   9   1  226.63    7.60
   0  -9  -1  179.22    6.51
   0  -9  -1  184.52    6.54
   0   9   1  176.47    6.13
   0   9   1  179.98    6.21
   1  -9  -1   64.26    2.80
  -1   9   1   66.78    2.58
  -1   9   1   63.18    2.62
   1  -9  -1   68.91    2.84
   2  -9  -1   40.90    2.07
  -2   9   1   39.60    1.85
   3  -9  -1   14.75    1.22
  -3   9   1   17.70    1.24
  -3   9   1   17.16    1.21
   3  -9  -1   17.83    1.45
   3  -9  -1   14.28    1.34
   3  -9  -1   16.69    1.15
   4  -9  -1   52.32    2.65
  -4   9   1   48.22    2.44
   4  -9  -1   54.93    2.46
   4  -9  -1   53.52    2.46
  -4   9   1   49.16    2.42
   4  -9  -1   44.26    2.59
  -5   9   1   -0.13    0.72
  -5   9   1   -0.37    0.60
   5  -9  -1   -0.59    0.66
   5  -9  -1   -0.64    0.69
   5  -9  -1    0.43    0.80
   6  -9  -1    1.28    1.07
  -6   9   1    1.26    0.95
   6  -9  -1    2.04    1.12
   7  -9  -1   37.39    2.62
   7  -9  -1   33.16    2.57
  -7   9   1   39.25    2.47
  -8   9   1    2.40    1.11
   8  -9  -1    1.37    1.20
   8  -9  -1    4.02    1.31
   9  -9  -1    2.52    1.36
  -9   9   1    0.82    1.02
   9  -9  -1    4.48    1.54
 -10   9   1    0.08    1.04
  10  -9  -1   -1.36    1.36
  10  -9  -1    0.55    1.43
  11  -9  -1    1.66    1.64
 -11  -8  -1    1.43    1.16
 -11  -8  -1    0.81    1.28
  11   8   1    0.12    1.08
  10   8   1    1.02    0.98
 -10  -8  -1    2.44    1.26
 -10  -8  -1    1.52    1.15
   9   8   1    4.22    1.10
  -9  -8  -1    1.37    1.09
  -9  -8  -1    4.73    1.29
  -8  -8  -1    0.59    0.91
   8   8   1    0.72    0.86
  -8  -8  -1    0.74    0.93
  -7  -8  -1   -1.45    0.71
   7   8   1   -0.07    0.73
  -7  -8  -1    1.01    0.87
   6   8   1   50.73    2.51
  -6  -8  -1   51.76    2.56
  -6  -8  -1   52.03    2.77
  -6  -8  -1   56.75    3.24
   6   8   1   50.81    2.61
  -6  -8  -1   50.46    2.78
  -5  -8  -1    1.88    0.72
  -5  -8  -1    3.93    0.66
  -5  -8  -1    2.66    0.99
   5   8   1    2.69    0.73
   5   8   1    2.94    0.63
  -5  -8  -1    2.44    0.81
  -5  -8  -1    3.01    0.71
  -4  -8  -1    0.98    0.42
  -4  -8  -1    0.58    0.56
  -4  -8  -1    0.77    0.48
  -4  -8  -1    0.22    0.53
   4   8   1    0.84    0.44
  -4  -8  -1    1.71    0.84
   4   8   1    0.15    0.50
  -4  -8  -1    0.50    0.58
   3   8   1   -0.17    0.35
  -3  -8  -1   -0.43    0.44
   3   8   1   -0.44    0.39
  -3  -8  -1   -0.31    0.47
  -3  -8  -1   -1.25    0.59
  -2  -8  -1    1.62    0.52
   2   8   1    1.34    0.40
   2   8   1    0.88    0.45
  -2  -8  -1    1.02    0.53
  -2  -8  -1    1.50    0.73
   1   8   1    8.74    0.80
  -1  -8  -1    9.53    0.89
  -1  -8  -1   10.75    0.92
  -1  -8  -1   13.14    1.10
   0  -8  -1  323.54   11.12
   0   8   1  319.20   10.63
   0  -8  -1  330.04   11.14
   0   8   1  323.34   10.68
   1  -8  -1    4.10    0.63
  -1   8   1    4.43    0.54
  -1   8   1    4.38    0.55
   1  -8  -1    4.67    0.66
  -2   8   1   10.23    0.84
   2  -8  -1   10.29    1.02
   2  -8  -1   10.36    1.01
  -2   8   1   10.59    0.85
   2  -8  -1   11.53    0.83
  -2   8   1   10.78    0.98
   2  -8  -1   10.21    0.88
   3  -8  -1    1.60    0.59
  -3   8   1    1.54    0.59
   3  -8  -1    1.79    0.64
   3  -8  -1    2.10    0.64
   3  -8  -1    1.99    0.59
  -3   8   1    1.34    0.53
   4  -8  -1   -1.03    0.51
   4  -8  -1   -0.56    0.56
   4  -8  -1   -1.95    0.54
   4  -8  -1   -0.31    0.60
  -4   8   1   -0.68    0.61
  -4   8   1   -0.40    0.52
   5  -8  -1    6.05    1.13
   5  -8  -1    5.50    1.05
   5  -8  -1    3.61    1.01
  -5   8   1    3.34    0.85
  -5   8   1    4.32    0.91
  -6   8   1  133.47    5.33
   6  -8  -1  129.23    5.65
   6  -8  -1  134.31    5.57
  -7   8   1    3.10    1.06
   7  -8  -1    1.03    1.18
   7  -8  -1    2.75    1.20
  -8   8   1    3.79    1.25
   8  -8  -1    3.43    1.43
   8  -8  -1    1.18    1.27
   9  -8  -1    1.42    1.30
   9  -8  -1    2.40    1.36
  -9   8   1    2.39    1.10
  10  -8  -1    5.95    1.70
  10  -8  -1    4.59    1.54
 -10   8   1    5.00    1.35
  11  -8  -1    0.01    1.43
  11   7   1    0.52    1.06
 -11  -7  -1    2.67    1.42
 -11  -7  -1    2.47    1.32
 -10  -7  -1    7.10    1.51
  10   7   1    4.86    1.24
 -10  -7  -1    7.08    1.55
   9   7   1    4.74    1.15
  -9  -7  -1    4.87    1.24
  -9  -7  -1    6.66    1.37
   8   7   1    6.39    1.15
  -8  -7  -1    6.55    1.24
  -8  -7  -1    6.32    1.25
  -7  -7  -1   18.32    1.98
  -7  -7  -1   24.02    1.85
   7   7   1   18.75    1.59
  -7  -7  -1   16.44    1.68
  -6  -7  -1    4.67    0.94
  -6  -7  -1    3.11    0.88
  -6  -7  -1    3.49    1.12
  -6  -7  -1    4.75    0.95
   6   7   1    3.14    0.83
   6   7   1    3.74    0.74
  -5  -7  -1   23.90    1.64
  -5  -7  -1   24.57    1.94
   5   7   1   23.04    1.40
  -5  -7  -1   27.74    1.69
   5   7   1   23.61    1.52
  -5  -7  -1   25.56    1.49
  -5  -7  -1   25.17    1.54
  -4  -7  -1   24.76    1.49
  -4  -7  -1   24.88    1.38
   4   7   1   25.70    1.46
  -4  -7  -1   23.43    1.28
   4   7   1   16.69    1.22
  -4  -7  -1   24.32    1.50
  -4  -7  -1   18.25    1.35
  -4  -7  -1   18.91    1.62
   4   7   1   21.98    1.19
  -3  -7  -1    7.34    0.77
  -3  -7  -1    6.29    0.61
   3   7   1    8.15    0.75
  -3  -7  -1    7.23    0.74
  -3  -7  -1    7.15    0.62
  -3  -7  -1    6.43    0.99
   3   7   1    6.74    0.62
   3   7   1    7.31    0.67
   2   7   1   25.28    1.10
  -2  -7  -1   21.76    1.23
  -2  -7  -1   25.56    1.25
   2   7   1   21.04    1.00
  -2  -7  -1   17.45    1.42
  -1  -7  -1   18.65    1.24
  -1  -7  -1   18.11    1.02
  -1  -7  -1   16.19    1.00
   0  -7  -1  122.39    4.39
   0  -7  -1  121.78    4.39
   1  -7  -1    1.38    0.42
   1  -7  -1    1.40    0.47
  -1   7   1    2.00    0.43
  -1   7   1    1.76    0.36
  -1   7   1    2.08    0.37
   2  -7  -1   40.37    1.78
  -3   7   1   10.26    0.92
   3  -7  -1   11.25    0.97
  -3   7   1   11.84    1.06
  -3   7   1    9.61    0.91
   3  -7  -1   10.35    0.97
   3  -7  -1   10.27    0.95
   3  -7  -1    9.10    0.94
   4  -7  -1   16.43    1.30
   4  -7  -1   16.12    1.33
   4  -7  -1   16.26    1.35
  -4   7   1   17.13    1.19
  -4   7   1   17.54    1.39
  -4   7   1   16.14    1.24
   4  -7  -1   12.83    1.30
   5  -7  -1    0.26    0.66
  -5   7   1   -0.11    0.65
  -5   7   1   -0.27    0.58
   5  -7  -1    0.32    0.59
   5  -7  -1   -0.08    0.75
   5  -7  -1    0.48    0.51
  -5   7   1   -0.26    0.52
   6  -7  -1    2.47    1.08
  -6   7   1    2.78    0.98
   6  -7  -1    1.90    1.04
  -6   7   1    2.96    1.10
   6  -7  -1    3.48    1.03
  -6   7   1    1.41    0.91
   7  -7  -1   66.84    3.66
   7  -7  -1   65.43    3.60
  -7   7   1   64.05    3.28
   8  -7  -1   94.36    4.56
  -8   7   1   88.53    4.14
   8  -7  -1   86.71    4.46
   9  -7  -1    0.92    1.29
   9  -7  -1   -1.30    1.04
  -9   7   1    1.38    1.02
  10  -7  -1    4.04    1.63
  10  -7  -1    1.22    1.30
  11  -7  -1    0.49    1.55
  12  -7  -1    0.91    1.71
 -12  -6  -1    7.75    1.81
 -11  -6  -1   16.44    2.09
 -11  -6  -1   12.85    2.00
  11   6   1   10.73    1.73
 -10  -6  -1    0.81    1.19
  10   6   1    1.61    1.03
 -10  -6  -1    2.15    1.17
  -9  -6  -1    3.52    1.13
  -9  -6  -1    2.69    1.11
   9   6   1    1.14    0.88
  -8  -6  -1    4.41    1.15
  -8  -6  -1    4.33    1.28
   8   6   1    5.03    1.08
  -8  -6  -1    5.23    1.16
  -7  -6  -1    2.65    0.90
  -7  -6  -1    2.53    1.05
   7   6   1    1.14    0.75
  -7  -6  -1    1.37    0.84
  -7  -6  -1    1.71    0.89
  -6  -6  -1    0.59    0.62
  -6  -6  -1    0.02    0.66
  -6  -6  -1   -0.38    0.59
   6   6   1    0.78    0.63
  -6  -6  -1    0.19    0.82
  -6  -6  -1    0.44    0.66
   6   6   1   -0.21    0.49
  -5  -6  -1    0.07    0.49
  -5  -6  -1   -0.21    0.54
   5   6   1   -0.12    0.42
  -5  -6  -1    0.68    0.74
   5   6   1    0.02    0.45
  -5  -6  -1   -0.75    0.52
  -5  -6  -1    0.40    0.55
   5   6   1   -0.61    0.51
  -4  -6  -1   34.96    1.64
  -4  -6  -1   31.88    1.64
  -4  -6  -1   35.37    1.78
  -4  -6  -1   38.14    1.83
   4   6   1   32.85    1.54
  -4  -6  -1   31.92    2.01
   4   6   1   33.45    1.77
   4   6   1   32.56    1.61
  -3  -6  -1   39.90    1.59
   3   6   1   36.46    1.74
  -3  -6  -1   34.10    1.69
   3   6   1   32.52    1.46
  -3  -6  -1   33.46    1.99
  -3  -6  -1   35.60    1.70
  -3  -6  -1   33.55    1.56
   3   6   1   34.05    1.53
   2   6   1  174.29    6.37
  -2  -6  -1  168.86    6.37
  -2  -6  -1  172.40    6.03
   2   6   1  173.66    5.99
   2   6   1  175.54    5.74
  -2  -6  -1  163.89    6.00
   1   6   1  173.09    5.88
  -1  -6  -1  167.29    6.20
   1   6   1  173.38    6.22
  -1  -6  -1  162.44    5.90
  -1  -6  -1  176.76    5.94
   0   6   1  209.86    7.15
   0  -6  -1  201.32    7.18
   0   6   1  213.04    7.37
   0  -6  -1  213.67    7.20
   1  -6  -1   79.61    3.05
  -1   6   1   78.50    2.81
   1  -6  -1   77.72    2.93
   1  -6  -1   83.47    2.94
  -1   6   1   80.14    2.83
   1  -6  -1   84.26    3.05
  -1   6   1   84.97    3.05
  -1   6   1   83.42    3.02
   2  -6  -1  273.52    9.25
   2  -6  -1  289.91    9.37
  -2   6   1  262.77    8.93
   2  -6  -1  272.86    9.22
  -2   6   1  266.88    8.94
   2  -6  -1  240.86    9.28
  -2   6   1  276.94    9.29
  -3   6   1   17.14    1.06
   3  -6  -1   16.50    1.15
  -3   6   1   18.28    1.25
   3  -6  -1   16.47    1.22
  -3   6   1   16.63    1.08
   3  -6  -1   16.31    1.20
   3  -6  -1   20.07    1.28
   4  -6  -1    4.87    0.72
   4  -6  -1    7.96    0.95
  -4   6   1    7.92    0.94
   4  -6  -1    9.08    0.98
   4  -6  -1    8.44    0.90
  -4   6   1    7.63    0.83
  -4   6   1    8.40    0.88
  -5   6   1   40.93    1.59
  -5   6   1   38.68    2.01
   5  -6  -1   39.26    2.13
  -5   6   1   36.11    1.95
   5  -6  -1   36.41    2.19
   5  -6  -1   35.72    2.13
   5  -6  -1   36.21    2.13
  -5   6   1   34.99    2.14
   6  -6  -1   72.74    3.52
  -6   6   1   70.49    3.24
  -6   6   1   72.69    2.89
  -6   6   1   75.22    3.31
   6  -6  -1   75.98    3.53
  -6   6   1   71.76    3.50
   6  -6  -1   72.56    3.54
  -7   6   1    5.06    0.77
   7  -6  -1    4.62    1.20
  -7   6   1    3.03    0.94
  -7   6   1    4.09    1.15
   7  -6  -1    4.55    1.17
   8  -6  -1    1.24    1.12
  -8   6   1    1.56    0.91
  -8   6   1    0.75    1.07
  -8   6   1    1.36    0.78
   8  -6  -1    1.71    1.25
   9  -6  -1   33.96    2.62
  -9   6   1   30.73    2.29
   9  -6  -1   30.83    2.63
  10  -6  -1    2.37    1.45
  10  -6  -1    4.48    1.47
  11  -6  -1    0.00    1.41
  12  -6  -1    0.32    1.66
 -12  -5  -1    2.90    1.52
 -11  -5  -1   -0.75    1.19
 -11  -5  -1    0.29    1.17
  11   5   1   -0.71    0.98
  10   5   1   11.35    1.56
 -10  -5  -1   10.09    1.61
 -10  -5  -1   13.82    1.75
  -9  -5  -1   29.23    2.32
   9   5   1   24.25    1.99
  -9  -5  -1   30.14    2.33
  -8  -5  -1   61.43    3.52
  -8  -5  -1   58.08    3.19
   8   5   1   60.90    3.13
  -8  -5  -1   59.15    3.22
   7   5   1   14.01    1.33
   7   5   1   13.05    1.42
  -7  -5  -1   11.32    1.33
  -7  -5  -1   12.30    1.36
   7   5   1   13.90    1.32
  -7  -5  -1   12.12    1.58
  -7  -5  -1   11.61    1.34
  -6  -5  -1    7.64    1.24
  -6  -5  -1    9.52    1.10
  -6  -5  -1    9.93    1.10
   6   5   1    7.79    1.05
   6   5   1    7.87    0.97
   6   5   1    8.85    0.94
  -6  -5  -1    6.30    0.98
  -5  -5  -1   31.54    1.69
  -5  -5  -1   29.63    1.77
  -5  -5  -1   32.39    1.80
   5   5   1   29.50    1.53
  -5  -5  -1   29.29    1.75
   5   5   1   28.99    1.76
  -5  -5  -1   28.46    1.93
   5   5   1   30.40    1.62
  -4  -5  -1    2.43    0.52
   4   5   1    3.06    0.53
  -4  -5  -1    2.39    0.75
  -4  -5  -1    1.97    0.55
   4   5   1    1.91    0.56
   4   5   1    2.05    0.42
  -4  -5  -1    2.17    0.56
  -4  -5  -1    2.58    0.57
   3   5   1  218.43    7.36
  -3  -5  -1  210.90    7.66
  -3  -5  -1  224.61    7.57
  -3  -5  -1  230.64    7.72
   3   5   1  217.58    7.31
   3   5   1  226.11    8.03
  -3  -5  -1  212.09    8.01
   3   5   1  224.89    7.67
  -3  -5  -1  212.63    7.59
   2   5   1  214.77    7.03
  -2  -5  -1  216.16    7.23
  -2  -5  -1  215.07    7.67
  -2  -5  -1  203.84    7.32
  -2  -5  -1  220.34    7.35
  -2  -5  -1  201.42    7.24
   2   5   1  214.97    7.65
   2   5   1  215.95    7.31
  -1  -5  -1  598.87   20.41
   1   5   1  603.07   20.40
  -1  -5  -1  572.93   20.21
   1   5   1  613.54   20.04
  -1  -5  -1  624.14   20.22
   0   5   1  279.14    9.40
   0  -5  -1  281.67    9.48
   0   5   1  278.60    9.62
   0  -5  -1  278.21    9.50
  -1   5   1  122.23    4.28
   1  -5  -1  123.11    4.27
   1  -5  -1  111.79    4.21
  -1   5   1  125.31    4.28
   1  -5  -1  119.78    4.28
   1  -5  -1  121.86    4.22
  -2   5   1  241.06    8.08
   2  -5  -1  247.81    8.37
  -2   5   1  235.62    8.31
  -2   5   1  240.58    8.09
   2  -5  -1  239.79    8.44
   2  -5  -1  237.61    8.37
   2  -5  -1  253.50    8.43
  -2   5   1  251.89    8.42
   3  -5  -1  329.75   11.84
  -3   5   1  343.85   11.48
  -3   5   1  356.64   11.91
  -3   5   1  355.67   11.51
   3  -5  -1  344.74   11.95
   3  -5  -1  357.81   11.94
   3  -5  -1  333.08   11.87
  -4   5   1  104.70    3.99
   4  -5  -1  109.10    4.20
   4  -5  -1   97.78    4.13
   4  -5  -1  105.93    4.19
  -4   5   1  108.32    3.98
   4  -5  -1  106.26    4.21
  -4   5   1  110.38    4.22
   5  -5  -1   79.56    3.44
  -5   5   1   79.42    3.29
  -5   5   1   79.55    3.25
   5  -5  -1   83.48    3.48
   5  -5  -1   75.01    3.45
   5  -5  -1   75.70    3.47
  -5   5   1   80.41    3.05
  -5   5   1   77.93    3.47
  -6   5   1   53.41    2.25
  -6   5   1   49.78    2.47
   6  -5  -1   45.87    2.65
  -6   5   1   47.48    2.49
   6  -5  -1   51.75    2.61
   6  -5  -1   47.88    2.71
  -6   5   1   53.30    2.74
  -6   5   1   50.96    2.52
   6  -5  -1   48.88    2.72
   7  -5  -1    1.46    0.94
  -7   5   1    0.02    0.72
   7  -5  -1   -0.04    0.93
  -7   5   1    0.75    0.85
  -7   5   1    0.50    0.64
  -8   5   1   79.26    3.48
   8  -5  -1   76.21    4.00
   8  -5  -1   73.48    3.94
  -8   5   1   78.20    3.99
  -8   5   1   82.70    3.68
  -9   5   1   33.17    2.18
  -9   5   1   34.98    2.33
  -9   5   1   39.30    2.79
   9  -5  -1   41.03    2.84
   9  -5  -1   33.36    2.71
  10  -5  -1    1.77    1.37
 -10   5   1    3.13    1.34
  11  -5  -1    2.16    1.51
  12  -5  -1    2.01    1.62
  13  -5  -1    0.85    1.85
 -13  -4  -1    2.89    1.60
 -12  -4  -1    0.40    1.32
 -11  -4  -1    5.36    1.49
  11   4   1    6.05    1.41
 -11  -4  -1    8.07    1.60
 -10  -4  -1   12.92    1.77
 -10  -4  -1   16.41    1.85
  10   4   1   14.09    1.66
  -9  -4  -1   14.16    1.84
  -9  -4  -1   14.92    1.75
  -9  -4  -1   17.94    1.80
   9   4   1   19.10    1.76
  -8  -4  -1   57.21    3.33
  -8  -4  -1   62.84    3.27
   8   4   1   60.18    3.08
   8   4   1   59.89    3.25
  -8  -4  -1   57.00    3.18
  -7  -4  -1   -0.15    0.65
  -7  -4  -1   -0.77    0.68
  -7  -4  -1   -0.17    0.81
   7   4   1   -0.14    0.57
   7   4   1   -0.10    0.60
   7   4   1    1.02    0.81
  -7  -4  -1   -0.02    0.68
   6   4   1   62.90    2.76
  -6  -4  -1   62.44    3.01
  -6  -4  -1   66.38    2.99
  -6  -4  -1   69.04    3.08
  -6  -4  -1   63.05    3.02
  -6  -4  -1   65.28    3.25
   6   4   1   66.28    3.07
   6   4   1   68.14    2.89
   5   4   1   76.37    3.24
  -5  -4  -1   70.35    3.40
   5   4   1   75.39    2.97
  -5  -4  -1   74.71    3.23
   5   4   1   76.16    3.06
  -5  -4  -1   79.35    3.25
  -5  -4  -1   74.95    3.20
   4   4   1  378.49   12.39
   4   4   1  377.29   12.88
  -4  -4  -1  373.99   13.24
   4   4   1  378.84   13.21
  -4  -4  -1  388.84   12.94
  -4  -4  -1  364.57   12.84
   4   4   1  374.66   12.45
  -4  -4  -1  371.30   12.92
  -4  -4  -1  370.96   12.81
  -3  -4  -1 1194.94   41.00
  -3  -4  -1 1207.11   41.41
  -3  -4  -1 1212.78   40.87
   3   4   1 1239.67   39.71
   3   4   1 1240.82   40.85
   3   4   1 1219.34   39.64
  -3  -4  -1 1283.57   40.82
   3   4   1 1235.84   41.40
  -3  -4  -1 1267.17   41.02
   2   4   1  119.96    4.54
   2   4   1  123.03    4.08
   2   4   1  123.21    4.28
  -2  -4  -1  123.90    4.29
  -2  -4  -1  123.74    4.22
  -2  -4  -1  117.84    4.27
  -2  -4  -1  121.23    4.57
  -2  -4  -1  118.08    4.23
   1   4   1  277.15    9.09
  -1  -4  -1  260.88    9.33
   1   4   1  265.30    9.33
  -1  -4  -1  275.17    9.23
   0   4   1  353.18   12.11
   0   4   1  358.90   11.96
   1  -4  -1  199.07    6.94
  -1   4   1  200.74    6.97
   1  -4  -1  207.65    6.91
   1  -4  -1  192.52    6.91
   1  -4  -1  209.28    6.95
  -1   4   1  208.52    6.93
   2  -4  -1   10.65    0.77
   2  -4  -1    8.66    0.76
   2  -4  -1   14.00    0.81
  -2   4   1   12.02    0.82
   2  -4  -1   12.75    0.83
   3  -4  -1   -0.14    0.25
   3  -4  -1   -0.01    0.34
   3  -4  -1   -0.31    0.37
  -3   4   1    0.84    0.42
  -3   4   1   -0.40    0.30
  -3   4   1   -0.31    0.29
  -3   4   1   -0.31    0.26
   3  -4  -1   -0.34    0.33
   4  -4  -1   -0.97    0.48
  -4   4   1   -0.07    0.50
  -4   4   1    0.03    0.47
   4  -4  -1   -0.46    0.41
  -4   4   1   -0.46    0.42
   4  -4  -1   -0.67    0.51
  -4   4   1   -0.85    0.43
   4  -4  -1   -0.95    0.41
   4  -4  -1   -0.67    0.47
  -5   4   1    2.09    0.59
   5  -4  -1    1.32    0.63
   5  -4  -1    1.23    0.53
  -5   4   1    1.72    0.60
  -5   4   1    3.03    0.76
   5  -4  -1    1.52    0.61
   5  -4  -1    1.32    0.65
  -5   4   1    0.53    0.54
   5  -4  -1    1.56    0.53
  -6   4   1  224.77    7.73
  -6   4   1  211.72    7.60
   6  -4  -1  217.53    7.55
   6  -4  -1  206.61    8.01
   6  -4  -1  201.01    7.96
  -6   4   1  213.22    7.88
  -6   4   1  217.09    8.02
  -6   4   1  212.76    7.68
   7  -4  -1  108.65    4.66
  -7   4   1  106.24    4.55
   7  -4  -1  106.87    4.29
  -7   4   1  103.87    4.66
  -7   4   1  102.31    4.32
  -7   4   1  105.65    4.31
   7  -4  -1  103.10    4.67
  -7   4   1  112.14    4.46
   7  -4  -1  103.88    4.72
  -8   4   1   27.31    1.92
   8  -4  -1   27.82    2.24
  -8   4   1   29.11    2.27
  -8   4   1   29.11    1.90
   8  -4  -1   27.69    2.27
  -9   4   1   29.70    2.19
   9  -4  -1   28.64    2.42
  -9   4   1   34.51    2.19
   9  -4  -1   30.98    2.63
  -9   4   1   32.80    2.62
  10  -4  -1    0.30    1.25
 -10   4   1    0.89    1.24
 -10   4   1    2.31    1.03
 -11   4   1   23.66    2.52
  11  -4  -1   22.66    2.57
  12  -4  -1    3.81    1.79
  13  -4  -1   -0.18    1.76
 -13  -3  -1    0.58    1.41
 -12  -3  -1    2.69    1.43
 -11  -3  -1    0.54    1.13
 -11  -3  -1    1.35    1.19
  10   3   1    3.45    1.17
 -10  -3  -1    0.71    1.13
 -10  -3  -1    0.74    1.10
   9   3   1    0.91    1.03
  -9  -3  -1   -0.62    0.92
  -9  -3  -1   -1.28    0.84
  -9  -3  -1    1.45    1.00
   9   3   1   -0.72    0.76
  -8  -3  -1    7.24    1.32
  -8  -3  -1    6.16    1.29
  -8  -3  -1    5.26    1.22
   8   3   1    7.02    1.33
   8   3   1    4.54    1.07
  -7  -3  -1   23.90    1.66
  -7  -3  -1   22.08    1.80
   7   3   1   22.24    1.82
  -7  -3  -1   22.17    1.79
   7   3   1   21.11    1.59
   7   3   1   21.62    1.60
   7   3   1   23.57    1.58
  -7  -3  -1   21.30    1.68
  -7  -3  -1   21.46    1.76
  -6  -3  -1  134.23    5.43
  -6  -3  -1  153.91    5.52
   6   3   1  142.18    5.20
   6   3   1  141.01    5.52
   6   3   1  138.33    5.36
  -6  -3  -1  133.81    5.48
  -6  -3  -1  135.65    5.66
   6   3   1  139.83    5.26
  -6  -3  -1  143.89    5.52
   5   3   1    0.82    0.40
  -5  -3  -1   -0.47    0.38
  -5  -3  -1    0.13    0.44
   5   3   1   -0.09    0.48
  -5  -3  -1   -0.20    0.42
  -5  -3  -1    0.37    0.49
   5   3   1    1.96    0.51
  -5  -3  -1   -0.55    0.52
   5   3   1    0.16    0.35
   4   3   1  872.89   29.33
  -4  -3  -1  844.22   29.02
   4   3   1  872.90   28.09
   4   3   1  868.52   28.94
  -4  -3  -1  902.77   29.06
  -4  -3  -1  835.78   28.91
   4   3   1  857.08   28.00
   4   3   1  875.11   28.94
   3   3   1  404.11   13.39
  -3  -3  -1  394.91   13.72
  -3  -3  -1  389.88   13.46
   3   3   1  399.85   13.70
   3   3   1  393.16   12.99
   3   3   1  401.44   13.43
  -3  -3  -1  388.69   13.41
  -3  -3  -1  409.76   13.48
   3   3   1  390.47   12.94
  -2  -3  -1  344.40   11.92
  -2  -3  -1  346.07   11.89
  -2  -3  -1  363.03   12.18
   2   3   1  347.71   11.56
   2   3   1  386.32   11.91
   2   3   1  333.43   12.13
   1   3   1 2307.91   76.06
  -1  -3  -1 2231.08   75.45
   1   3   1 2255.27   75.84
   1   3   1 2277.44   75.44
   0   3   1 4190.69  140.31
  -1   3   1  589.05   19.95
  -1   3   1  592.60   19.67
  -1   3   1  598.75   19.51
   1  -3  -1  569.19   19.73
   1  -3  -1  601.80   19.70
   1  -3  -1  580.86   19.80
   1  -3  -1  599.39   19.78
  -2   3   1   22.16    0.98
   2  -3  -1   20.81    1.07
   2  -3  -1   21.51    1.09
   2  -3  -1   22.74    1.07
  -2   3   1   21.62    1.10
  -2   3   1   23.11    1.04
  -2   3   1   22.95    1.00
  -3   3   1    0.34    0.29
  -3   3   1    0.29    0.32
   3  -3  -1    0.01    0.29
   3  -3  -1    0.22    0.28
   3  -3  -1    0.16    0.25
   3  -3  -1    0.29    0.33
   3  -3  -1    0.57    0.35
  -3   3   1    0.27    0.27
  -3   3   1    0.30    0.26
   4  -3  -1   27.57    1.55
  -4   3   1   27.05    1.57
  -4   3   1   26.49    1.47
   4  -3  -1   24.74    1.56
   4  -3  -1   27.33    1.39
  -4   3   1   25.65    1.38
  -4   3   1   29.14    1.46
   4  -3  -1   26.15    1.52
   5  -3  -1  165.30    6.09
   5  -3  -1  156.54    6.05
   5  -3  -1  156.77    5.72
   5  -3  -1  160.43    6.06
   5  -3  -1  153.79    6.07
  -5   3   1  156.52    5.97
  -5   3   1  166.95    5.85
  -5   3   1  157.93    5.74
  -5   3   1  162.17    6.13
  -6   3   1    4.67    0.80
   6  -3  -1    6.10    1.05
  -6   3   1    5.45    0.87
   6  -3  -1    3.90    0.86
   6  -3  -1    4.82    0.87
  -6   3   1    6.37    1.03
   6  -3  -1    4.07    0.77
  -6   3   1    5.40    0.87
  -6   3   1    3.86    0.77
  -7   3   1    0.06    0.61
  -7   3   1   -0.06    0.65
  -7   3   1    0.11    0.56
   7  -3  -1    1.10    0.77
  -7   3   1    0.52    0.76
  -7   3   1   -0.20    0.61
   7  -3  -1   -0.74    0.72
   7  -3  -1    1.61    0.66
   7  -3  -1    0.03    0.59
   8  -3  -1    2.27    0.97
   8  -3  -1    3.15    1.12
  -8   3   1    3.15    0.84
  -8   3   1    3.47    1.09
  -8   3   1    2.98    0.92
  -9   3   1   22.40    1.84
  -9   3   1   19.15    1.72
  -9   3   1   19.03    1.97
   9  -3  -1   16.84    1.88
   9  -3  -1   18.91    2.06
 -10   3   1   -0.63    0.82
  10  -3  -1   -1.09    1.10
 -10   3   1   -0.14    1.13
 -11   3   1    1.03    1.33
  11  -3  -1    0.82    1.39
 -11   3   1    1.68    0.99
 -12   3   1    2.13    1.46
  12  -3  -1    2.59    1.57
 -13   3   1    4.02    1.81
  13  -3  -1    0.08    1.70
 -13  -2  -1    2.16    1.58
 -12  -2  -1    3.93    1.52
 -11  -2  -1   17.46    2.12
  10   2   1    0.41    1.22
  10   2   1    1.47    0.97
 -10  -2  -1    1.30    1.01
 -10  -2  -1    2.22    1.26
 -10  -2  -1   -1.17    0.97
   9   2   1  218.40    8.19
  -9  -2  -1  222.22    8.57
  -9  -2  -1  211.92    8.58
   9   2   1  213.63    8.60
  -9  -2  -1  202.35    8.39
   8   2   1   14.30    1.80
  -8  -2  -1   23.48    1.88
  -8  -2  -1   14.82    1.74
   8   2   1   18.29    1.66
  -8  -2  -1   17.13    1.77
  -7  -2  -1    2.15    0.83
  -7  -2  -1    3.60    0.80
   7   2   1    2.88    0.72
  -7  -2  -1    1.60    0.73
   7   2   1    3.42    0.78
   7   2   1    2.39    0.71
   7   2   1    1.91    0.80
  -7  -2  -1    4.32    0.95
  -7  -2  -1    2.81    0.61
   6   2   1    2.68    0.61
  -6  -2  -1    3.21    0.71
  -6  -2  -1    2.44    0.73
   6   2   1    4.53    0.85
   6   2   1    4.14    0.72
  -6  -2  -1    4.11    0.69
  -6  -2  -1    3.31    0.55
  -6  -2  -1    2.78    0.78
   6   2   1    3.60    0.72
  -5  -2  -1   14.78    1.25
   5   2   1   17.24    1.29
   5   2   1   18.24    1.16
   5   2   1   16.17    1.19
  -5  -2  -1   16.55    1.00
  -5  -2  -1   18.38    1.26
  -5  -2  -1   12.97    1.12
  -5  -2  -1   15.77    1.31
   5   2   1   17.95    1.11
  -5  -2  -1   17.49    1.32
  -4  -2  -1  118.97    4.64
  -4  -2  -1  119.65    4.32
   4   2   1  125.62    4.70
   4   2   1  124.83    4.48
  -4  -2  -1  128.53    4.70
  -4  -2  -1  128.52    4.70
  -4  -2  -1  131.16    4.69
  -4  -2  -1  122.96    4.81
   4   2   1  127.43    4.44
   4   2   1  126.83    4.80
   4   2   1  125.78    4.63
  -3  -2  -1  264.53   10.66
  -3  -2  -1  308.23   10.72
   3   2   1  324.88   10.73
  -3  -2  -1  331.21   10.79
   3   2   1  322.84   10.76
  -3  -2  -1  328.77   10.97
   3   2   1  316.41   10.39
   3   2   1  311.75   10.92
  -3  -2  -1  318.65   10.77
  -3  -2  -1  317.80   10.28
   3   2   1  322.21   10.36
  -2  -2  -1  223.81    7.19
  -2  -2  -1  219.78    7.45
  -2  -2  -1  208.39    7.41
  -2  -2  -1  212.08    7.44
   2   2   1  214.20    7.60
   2   2   1  218.94    7.42
  -2  -2  -1  216.58    7.61
   2   2   1  214.43    7.15
   2   2   1  218.46    7.43
  -2  -2  -1  219.63    7.21
   2   2   1  216.74    7.39
   2   2   1  220.55    7.42
   2   2   1  218.26    7.40
   2   2   1  224.99    7.19
  -1  -2  -1 1563.43   54.79
   1   2   1 1614.55   53.48
   1   2   1 1619.16   53.69
   1   2   1 1577.61   53.01
  -1  -2  -1 1505.95   55.83
  -1  -2  -1 1620.11   55.81
  -1  -2  -1 1632.32   54.53
  -1  -2  -1 1579.50   53.04
  -1   2   1 1911.32   63.38
  -1   2   1 1930.75   62.03
  -1   2   1 1948.06   62.91
   1  -2  -1 1816.82   63.87
   1  -2  -1 1907.10   63.40
  -1   2   1 1786.17   61.78
  -1   2   1 1902.00   63.57
   1  -2  -1 1987.51   64.02
   1  -2  -1 1915.35   63.44
   1  -2  -1 1877.40   63.47
  -1   2   1 1946.11   63.05
  -2   2   1  933.79   29.99
  -2   2   1  903.86   29.15
  -2   2   1  877.71   29.13
   2  -2  -1  929.75   29.11
   2  -2  -1  914.41   30.00
  -2   2   1  889.12   30.07
   2  -2  -1  880.51   30.02
   2  -2  -1  889.16   29.13
  -2   2   1  922.36   30.07
  -2   2   1  886.36   30.01
   2  -2  -1  896.27   30.12
   2  -2  -1  917.82   30.09
   3  -2  -1  347.31   12.23
  -3   2   1  356.04   11.83
   3  -2  -1  358.29   12.26
  -3   2   1  352.86   12.21
   3  -2  -1  370.15   11.79
  -3   2   1  357.21   12.25
   3  -2  -1  359.55   11.81
  -3   2   1  360.91   11.81
   3  -2  -1  362.36   12.24
   4  -2  -1   25.85    1.40
  -4   2   1   23.88    1.39
   4  -2  -1   21.87    1.36
   4  -2  -1   22.67    1.46
  -4   2   1   22.07    1.43
  -4   2   1   22.53    1.26
   4  -2  -1   22.20    1.35
  -4   2   1   22.45    1.31
   5  -2  -1  289.74   10.51
  -5   2   1  300.84   10.14
  -5   2   1  297.86   10.06
  -5   2   1  289.07   10.53
   5  -2  -1  308.00   10.53
  -5   2   1  292.34   10.45
   5  -2  -1  293.02   10.50
  -6   2   1  276.80   10.20
  -6   2   1  274.87   10.03
   6  -2  -1  293.58   10.18
  -6   2   1  279.78    9.71
   6  -2  -1  278.19    9.75
  -6   2   1  289.83    9.80
   6  -2  -1  274.18   10.16
   6  -2  -1  276.89   10.19
  -6   2   1  278.65   10.11
   7  -2  -1  120.52    5.17
   7  -2  -1  117.26    5.05
  -7   2   1  122.80    5.06
  -7   2   1  120.40    4.73
  -7   2   1  123.04    4.94
   7  -2  -1  119.07    4.80
  -7   2   1  126.73    5.23
  -8   2   1   84.03    3.90
   8  -2  -1   84.79    4.08
  -8   2   1   85.88    3.74
  -8   2   1   82.27    4.14
  -8   2   1   91.32    4.13
   8  -2  -1   87.40    4.23
   8  -2  -1   81.63    3.79
   9  -2  -1   17.66    1.95
  -9   2   1   16.10    1.68
  -9   2   1   13.68    1.77
   9  -2  -1   16.35    1.80
  10  -2  -1    4.11    1.46
 -10   2   1    4.84    1.37
 -10   2   1    4.48    1.26
  11  -2  -1    2.60    1.43
 -11   2   1   -0.65    0.90
 -11   2   1    0.37    1.24
  12  -2  -1    1.55    1.58
 -12   2   1    1.83    1.48
  13  -2  -1    2.33    1.86
 -13   2   1    3.10    1.73
 -13  -1  -1   -0.18    1.46
 -12  -1  -1   27.97    2.72
  11   1   1   10.46    1.90
 -11  -1  -1   10.87    1.80
 -10  -1  -1   83.83    4.42
  10   1   1   89.36    4.75
 -10  -1  -1   83.94    4.48
  10   1   1   93.16    4.42
 -10  -1  -1   88.59    4.59
  -9  -1  -1   38.36    2.52
   9   1   1   31.56    2.66
  -9  -1  -1   34.68    2.67
   9   1   1   33.05    2.42
  -9  -1  -1   29.58    2.50
  -8  -1  -1  237.43    9.24
  -8  -1  -1  236.77    8.61
  -8  -1  -1  242.29    9.31
   8   1   1  247.04    9.40
   8   1   1  246.21    8.90
  -8  -1  -1  250.84    9.32
   8   1   1  247.28    9.22
   7   1   1   12.13    1.38
   7   1   1   10.40    1.22
  -7  -1  -1   11.65    1.04
  -7  -1  -1   13.23    1.33
  -7  -1  -1   12.70    1.29
   7   1   1   13.60    1.30
   7   1   1   13.00    1.20
  -7  -1  -1   12.43    1.33
  -7  -1  -1    9.56    1.25
   6   1   1   -0.20    0.51
   6   1   1   -0.18    0.44
  -6  -1  -1    0.02    0.47
  -6  -1  -1   -0.01    0.53
  -6  -1  -1    0.22    0.42
   6   1   1    0.04    0.59
  -6  -1  -1   -0.11    0.56
   6   1   1   -0.02    0.44
  -6  -1  -1    0.15    0.49
  -5  -1  -1   -0.28    0.50
  -5  -1  -1   -0.29    0.41
   5   1   1    1.57    0.53
  -5  -1  -1   -0.63    0.32
  -5  -1  -1    0.22    0.35
   5   1   1    0.21    0.47
  -5  -1  -1   -0.15    0.46
  -5  -1  -1    0.38    0.45
   5   1   1    0.74    0.41
   5   1   1    1.15    0.45
  -4  -1  -1   50.32    2.18
  -4  -1  -1   47.34    2.17
   4   1   1   49.20    2.19
  -4  -1  -1   49.08    2.17
  -4  -1  -1   50.56    1.98
   4   1   1   47.38    2.13
   4   1   1   50.65    2.21
  -4  -1  -1   49.03    2.22
   4   1   1   49.29    2.06
   4   1   1   52.70    2.05
   3   1   1  162.92    5.56
   3   1   1  155.35    5.56
  -3  -1  -1  157.07    5.31
  -3  -1  -1  160.00    5.59
   3   1   1  157.10    5.60
  -3  -1  -1  150.25    5.65
  -3  -1  -1  151.22    5.56
   3   1   1  158.27    5.35
  -3  -1  -1  167.62    5.36
   3   1   1  155.69    5.37
   3   1   1  158.15    5.65
  -3  -1  -1  155.58    5.57
   2   1   1 1008.61   31.68
   2   1   1 1024.69   32.70
   2   1   1  975.54   32.89
  -2  -1  -1  939.04   32.68
   2   1   1  983.23   32.71
  -2  -1  -1  940.28   32.59
   2   1   1  993.30   31.71
  -2  -1  -1  969.03   32.72
  -2  -1  -1  972.43   31.67
  -2  -1  -1  980.35   32.57
  -2  -1  -1  973.98   32.91
  -2  -1  -1 1019.46   31.67
   2   1   1  982.56   32.61
   2   1   1 1003.91   32.56
   1   1   1  460.34   16.57
  -1  -1  -1  511.70   17.02
   1   1   1  515.63   16.69
   1   1   1  482.94   16.97
  -1  -1  -1  515.29   17.07
  -1  -1  -1  529.01   16.94
  -1  -1  -1  522.84   16.98
   1   1   1  495.52   17.02
   1   1   1  469.90   16.93
  -1  -1  -1  523.91   17.00
   1   1   1  519.35   16.92
   1   1   1  492.67   16.83
  -1  -1  -1  498.21   16.96
   0  -1  -1   26.81    0.99
   0   1   1   22.31    0.97
   0  -1  -1   27.41    0.99
   0  -1  -1   27.34    1.00
   1  -1  -1    4.25    0.32
  -1   1   1    3.74    0.28
   1  -1  -1    4.26    0.27
   1  -1  -1    4.36    0.32
  -1   1   1    4.36    0.30
  -1   1   1    4.14    0.27
   1  -1  -1    4.08    0.30
   1  -1  -1    3.70    0.26
   1  -1  -1    4.16    0.33
  -1   1   1    3.93    0.33
  -1   1   1    4.56    0.31
  -1   1   1    3.95    0.32
  -2   1   1   80.32    2.82
  -2   1   1   75.63    2.81
  -2   1   1   74.87    2.79
   2  -1  -1   72.91    2.81
  -2   1   1   74.46    2.67
  -2   1   1   75.93    2.84
  -2   1   1   77.31    2.70
   2  -1  -1   74.29    2.82
   2  -1  -1   71.72    2.79
   2  -1  -1   76.78    2.67
  -3   1   1    0.15    0.31
   3  -1  -1   -0.37    0.29
  -3   1   1    0.52    0.28
   3  -1  -1   -0.14    0.25
   3  -1  -1    0.15    0.28
   3  -1  -1    0.33    0.27
   3  -1  -1   -0.08    0.22
  -3   1   1   -0.22    0.26
  -3   1   1    0.68    0.29
  -3   1   1    0.23    0.24
   3  -1  -1    0.17    0.26
  -4   1   1  604.79   20.11
   4  -1  -1  635.42   20.87
   4  -1  -1  612.54   20.87
   4  -1  -1  630.00   20.13
  -4   1   1  613.82   20.84
  -4   1   1  640.45   20.88
  -4   1   1  629.89   20.19
   4  -1  -1  598.88   20.16
  -4   1   1  598.41   20.83
   4  -1  -1  598.33   20.82
  -5   1   1   87.27    3.40
   5  -1  -1   91.47    3.63
  -5   1   1   84.12    3.68
   5  -1  -1   83.81    3.46
   5  -1  -1   89.17    3.43
  -5   1   1   90.35    3.49
   5  -1  -1   85.95    3.63
   5  -1  -1   84.96    3.68
  -5   1   1   85.69    3.62
  -6   1   1   11.69    1.24
  -6   1   1    9.69    1.10
   6  -1  -1   11.35    1.17
  -6   1   1    9.85    1.09
  -6   1   1   11.66    1.07
   6  -1  -1   11.53    1.08
   6  -1  -1    9.58    1.17
   7  -1  -1   74.17    3.36
  -7   1   1   77.25    3.27
   7  -1  -1   72.95    3.53
  -7   1   1   76.94    3.60
  -7   1   1   76.19    3.66
   7  -1  -1   77.69    3.68
  -7   1   1   75.64    3.48
  -8   1   1   25.01    1.94
  -8   1   1   26.99    2.19
   8  -1  -1   25.56    2.19
   8  -1  -1   25.70    1.99
  -8   1   1   26.95    2.19
   8  -1  -1   24.82    1.87
  -8   1   1   28.92    1.81
   9  -1  -1    5.29    1.37
  -9   1   1    5.09    1.27
  -9   1   1    6.45    1.26
 -10   1   1   15.58    1.83
  10  -1  -1   14.66    1.99
 -10   1   1   12.27    1.89
 -11   1   1    2.52    1.24
  11  -1  -1    4.98    1.59
  12  -1  -1    0.64    1.50
 -12   1   1   -2.90    1.11
 -13   1   1    3.09    1.67
  13  -1  -1    2.40    1.79
 -13   0  -1    4.78    1.74
 -12   0  -1   -0.19    1.39
  12   0   1    0.63    1.47
  11   0   1   21.01    2.39
 -11   0  -1   16.94    1.98
 -11   0  -1   20.21    2.20
 -10   0  -1   -0.05    1.06
 -10   0  -1    0.78    1.18
  10   0   1    2.94    1.40
   9   0   1   63.59    3.71
  -9   0  -1   63.08    3.40
  -9   0  -1   71.44    3.66
   9   0   1   64.76    3.36
  -9   0  -1   65.74    3.59
   8   0   1   19.12    1.71
  -8   0  -1   18.17    1.64
   8   0   1   18.24    1.80
   8   0   1   20.68    1.68
  -8   0  -1   17.95    1.82
  -8   0  -1   16.18    1.63
   7   0   1    7.07    1.01
  -7   0  -1    6.23    0.84
   7   0   1    7.14    0.96
   7   0   1    8.73    1.19
  -7   0  -1    8.93    1.08
  -7   0  -1    9.00    1.02
   7   0   1    8.66    0.94
  -7   0  -1    7.51    1.04
  -7   0  -1    5.83    1.04
   6   0   1    1.81    0.59
  -6   0  -1    1.20    0.67
   6   0   1    0.23    0.66
  -6   0  -1    2.77    0.73
  -6   0  -1    1.14    0.58
   6   0   1    1.40    0.60
  -6   0  -1    1.95    0.68
   6   0   1    2.02    0.67
  -6   0  -1    1.59    0.55
   5   0   1   41.96    2.17
   5   0   1   42.25    1.99
  -5   0  -1   41.52    1.91
   5   0   1   43.81    1.99
  -5   0  -1   41.20    2.09
  -5   0  -1   46.65    2.16
  -5   0  -1   43.60    2.08
  -5   0  -1   43.08    2.14
   5   0   1   43.68    2.12
   4   0   1  305.96   10.24
   4   0   1  297.97   10.59
  -4   0  -1  297.29   10.16
  -4   0  -1  324.23   10.24
  -4   0  -1  301.57   10.59
  -4   0  -1  316.38   10.62
   4   0   1  310.10   10.59
   4   0   1  311.01   10.22
  -4   0  -1  316.32   10.62
  -4   0  -1  300.55   10.62
   4   0   1  305.92   10.60
  -4   0  -1  287.99   10.55
   4   0   1  298.62   10.60
   3   0   1   57.23    2.10
  -3   0  -1   52.58    2.19
  -3   0  -1   48.87    2.04
  -3   0  -1   56.53    2.10
   3   0   1   52.32    2.09
   3   0   1   56.86    2.23
   3   0   1   51.70    2.16
   3   0   1   57.30    2.20
   3   0   1   54.85    2.24
   3   0   1   56.27    2.21
  -3   0  -1   52.50    2.18
  -3   0  -1   54.25    2.20
  -3   0  -1   55.08    2.22
  -3   0  -1   57.79    2.25
   2   0   1 2364.59   78.69
   2   0   1 2332.81   77.78
  -2   0  -1 2404.84   77.43
   2   0   1 2430.83   75.34
  -2   0  -1 2312.03   77.72
   2   0   1 2377.55   77.40
  -2   0  -1 2296.43   78.60
   2   0   1 2377.23   77.72
   2   0   1 2328.35   77.52
  -2   0  -1 2291.63   77.50
  -2   0  -1 2375.25   75.30
  -2   0  -1 2354.96   77.79
   2   0   1 2308.32   75.36
  -1   0  -1   23.58    1.31
   1   0   1   24.03    1.26
   1   0   1   24.89    1.32
   1   0   1   23.38    1.33
  -1   0  -1   24.90    1.33
  -1   0  -1   23.91    1.25
  -1   0  -1   19.52    1.31
   0   0  -1  375.40   11.54
   0   0   1  314.59   11.07
   0   0   1  309.64   11.40
   0   0  -1  363.34   11.13
   0   0   1  311.21   11.44
   0   0  -1  353.18   11.45
   1   0  -1   17.91    0.81
   1   0  -1   17.64    0.80
   1   0  -1   19.71    0.82
  -1   0   1   16.63    0.81
  -1   0   1   16.56    0.79
  -1   0   1   15.99    0.73
  -1   0   1   17.43    0.80
   1   0  -1   17.89    0.83
   1   0  -1   17.86    0.75
  -1   0   1   19.37    0.82
  -1   0   1   18.11    0.77
   1   0  -1   17.82    0.77
  -1   0   1   16.74    0.82
  -1   0   1   17.54    0.80
   2   0  -1  139.12    4.81
   2   0  -1  141.36    4.97
   2   0  -1  132.30    4.97
  -2   0   1  164.46    5.06
  -2   0   1  137.07    4.97
  -2   0   1  126.90    4.74
  -2   0   1  139.09    4.80
   2   0  -1  157.27    5.03
   2   0  -1  141.00    4.98
  -2   0   1  128.24    4.95
   2   0  -1  140.61    5.01
  -3   0   1   77.15    2.85
  -3   0   1   81.16    3.06
   3   0  -1   76.61    2.91
   3   0  -1   78.80    2.87
   3   0  -1   77.56    3.02
  -3   0   1   75.85    3.03
  -3   0   1   80.47    3.05
   3   0  -1   80.69    3.08
   3   0  -1   77.97    3.03
   3   0  -1   75.00    3.03
  -3   0   1   81.59    2.93
  -3   0   1   75.73    3.07
   4   0  -1    1.07    0.40
  -4   0   1    2.04    0.58
  -4   0   1    2.15    0.52
   4   0  -1    2.06    0.52
  -4   0   1    2.84    0.53
  -4   0   1    2.59    0.45
  -4   0   1    2.87    0.53
   4   0  -1    1.62    0.44
   4   0  -1    2.18    0.59
   4   0  -1    2.32    0.49
   5   0  -1   18.75    1.50
  -5   0   1   20.28    1.53
   5   0  -1   19.73    1.45
  -5   0   1   20.33    1.41
  -5   0   1   20.61    1.25
   5   0  -1   20.69    1.35
  -5   0   1   19.73    1.40
   5   0  -1   21.72    1.36
  -5   0   1   20.35    1.38
   6   0  -1   74.80    3.44
  -6   0   1   72.45    3.33
  -6   0   1   80.91    3.40
   6   0  -1   72.35    3.33
  -6   0   1   73.43    3.35
  -6   0   1   73.14    3.07
  -6   0   1   73.95    3.41
   6   0  -1   73.87    3.22
   6   0  -1   77.91    3.17
  -7   0   1   15.51    1.45
   7   0  -1   17.26    1.60
  -7   0   1   15.61    1.57
  -7   0   1   16.22    1.30
  -7   0   1   14.77    1.44
   7   0  -1   17.09    1.61
   7   0  -1   17.55    1.49
   8   0  -1   11.21    1.38
  -8   0   1   12.58    1.60
  -8   0   1   13.54    1.62
   8   0  -1   12.94    1.49
   8   0  -1   15.85    1.70
  -8   0   1   14.63    1.35
  -8   0   1   11.84    1.46
  -9   0   1   17.78    1.84
  -9   0   1   14.83    1.81
   9   0  -1   19.06    2.00
  -9   0   1   16.77    1.88
   9   0  -1   19.97    1.81
 -10   0   1    1.77    1.17
 -10   0   1    3.04    1.25
  10   0  -1    0.07    1.23
  11   0  -1    0.11    1.25
 -11   0   1   -0.24    1.09
  12   0  -1    7.29    1.98
 -12   0   1    6.43    1.80
 -13   0   1   -0.18    1.49
  13  -1   1    0.73    1.65
 -13   1  -1    4.70    1.83
  12  -1   1    1.35    1.50
 -12   1  -1    1.08    1.35
 -11   1  -1   13.19    1.73
  11  -1   1   12.12    1.99
 -11   1  -1   14.45    1.98
 -10   1  -1   -0.82    1.14
 -10   1  -1   -1.62    0.89
  10  -1   1   -1.93    1.19
  -9   1  -1   -0.44    0.76
   9  -1   1    0.94    0.85
  -9   1  -1    0.48    0.92
   9  -1   1   -0.14    1.07
  -9   1  -1    0.60    1.01
  -8   1  -1  152.14    6.34
   8  -1   1  159.29    6.54
   8  -1   1  159.00    6.41
  -8   1  -1  159.03    6.46
  -8   1  -1  158.41    6.26
  -8   1  -1  156.01    5.96
   8  -1   1  155.01    6.07
   7  -1   1    2.46    0.75
  -7   1  -1    4.84    0.86
  -7   1  -1    2.29    0.93
  -7   1  -1    2.37    0.68
   7  -1   1    2.13    0.78
  -7   1  -1    1.77    0.80
   7  -1   1    2.61    0.97
  -6   1  -1    9.29    1.09
   6  -1   1    8.25    0.91
   6  -1   1    8.75    1.03
  -6   1  -1    9.92    0.97
  -6   1  -1    9.97    0.96
  -6   1  -1    9.18    1.02
   6  -1   1    9.02    1.11
   5  -1   1  379.38   12.20
   5  -1   1  355.99   12.69
   5  -1   1  350.36   12.18
  -5   1  -1  359.91   12.15
   5  -1   1  378.58   12.65
  -5   1  -1  348.93   12.62
   5  -1   1  356.57   12.66
  -5   1  -1  374.38   12.68
  -5   1  -1  378.80   12.22
  -5   1  -1  356.42   12.58
  -5   1  -1  354.65   12.63
  -4   1  -1  218.52    7.97
   4  -1   1  229.50    7.98
   4  -1   1  222.76    8.00
   4  -1   1  218.84    8.01
   4  -1   1  234.64    7.69
  -4   1  -1  231.58    8.00
  -4   1  -1  221.69    7.97
  -4   1  -1  224.41    7.66
  -4   1  -1  219.32    7.89
  -4   1  -1  237.61    7.71
   4  -1   1  220.45    7.68
  -3   1  -1   94.60    3.31
  -3   1  -1   87.83    3.43
  -3   1  -1   90.72    3.30
   3  -1   1   91.60    3.49
   3  -1   1   88.44    3.45
   3  -1   1   95.89    3.48
  -3   1  -1   91.52    3.35
  -3   1  -1   95.48    3.47
   3  -1   1   93.72    3.31
   3  -1   1   90.13    3.33
   3  -1   1   89.62    3.43
  -3   1  -1   93.32    3.48
   3  -1   1   88.11    3.29
  -3   1  -1   94.08    3.49
   2  -1   1   79.08    2.86
  -2   1  -1   75.47    2.73
   2  -1   1   81.37    2.74
  -2   1  -1   77.15    2.86
   2  -1   1   75.18    2.86
   2  -1   1   74.26    2.88
  -2   1  -1   77.83    2.88
  -2   1  -1   74.68    2.76
  -2   1  -1   77.05    2.87
  -2   1  -1   80.69    2.75
  -2   1  -1   77.09    2.85
   2  -1   1   75.07    2.76
   1  -1   1 1031.79   33.29
  -1   1  -1 1025.29   34.38
  -1   1  -1 1045.33   33.30
  -1   1  -1 1056.15   34.24
   1  -1   1 1086.46   34.26
  -1   1  -1 1046.93   34.27
  -1   1  -1 1031.78   33.34
   1  -1   1  980.25   34.27
   1  -1   1 1001.31   34.39
  -1   1  -1 1033.53   34.36
   0   1  -1  513.93   16.94
   0   1  -1  503.81   17.43
   0  -1   1  490.31   17.40
   0  -1   1  549.33   16.99
   0  -1   1  512.16   17.47
   0  -1   1  504.67   16.95
   0  -1   1  525.73   17.54
   0   1  -1  537.65   17.51
   0   1  -1  534.09   17.00
   0   1  -1  544.64   17.45
   0   1  -1  508.78   17.50
  -1  -1   1  303.60   10.58
   1   1  -1  303.52   10.57
  -1  -1   1  313.77   10.21
   1   1  -1  318.69   10.56
   1   1  -1  312.74   10.27
   1   1  -1  308.92   10.21
   1   1  -1  319.57   10.58
   1   1  -1  319.77   10.57
  -1  -1   1  301.29   10.57
  -1  -1   1  318.71   10.24
  -1  -1   1  322.73   10.55
   2   1  -1   94.03    3.36
  -3  -1   1  130.51    5.26
   3   1  -1  153.92    5.60
   3   1  -1  158.32    5.35
   3   1  -1  157.40    5.60
  -3  -1   1  166.74    5.62
  -3  -1   1  156.91    5.64
  -3  -1   1  164.93    5.40
   3   1  -1  158.36    5.42
  -3  -1   1  154.25    5.60
  -4  -1   1   36.69    1.85
  -4  -1   1   37.41    1.80
   4   1  -1   33.69    1.60
  -4  -1   1   32.98    1.74
   4   1  -1   31.68    1.76
  -4  -1   1   35.21    1.77
   4   1  -1   32.54    1.66
   4   1  -1   32.82    1.72
  -5  -1   1    5.25    0.64
   5   1  -1    8.13    0.88
  -5  -1   1    8.01    0.95
  -5  -1   1    5.77    0.83
   5   1  -1    7.44    0.85
   5   1  -1    7.29    0.79
  -5  -1   1    7.76    0.92
  -5  -1   1    8.21    0.90
   5   1  -1    8.03    0.96
   6   1  -1   12.02    1.26
  -6  -1   1   10.29    1.10
  -6  -1   1    9.41    0.94
  -6  -1   1   10.19    1.14
  -6  -1   1   10.02    1.19
   6   1  -1   12.60    1.23
   6   1  -1   11.64    1.10
   6   1  -1   12.41    1.13
  -6  -1   1   10.48    1.12
   7   1  -1    6.97    1.12
   7   1  -1    5.18    1.15
  -7  -1   1    5.66    1.07
  -7  -1   1    7.52    1.14
  -7  -1   1    4.33    1.16
  -7  -1   1    6.87    1.09
   7   1  -1    6.66    1.09
  -7  -1   1    7.41    0.97
   7   1  -1    5.29    0.93
   8   1  -1    4.62    1.15
  -8  -1   1    5.11    1.26
   8   1  -1    5.27    1.38
  -8  -1   1    4.61    1.34
  -8  -1   1    6.25    1.32
  -9  -1   1   30.47    2.53
   9   1  -1   28.46    2.57
  -9  -1   1   27.91    2.51
   9   1  -1   32.31    2.31
  -9  -1   1   30.20    2.43
 -10  -1   1    0.17    1.01
  10   1  -1    1.97    1.25
  11   1  -1    4.26    1.55
 -11  -1   1    3.90    1.46
 -12  -1   1    4.32    1.65
 -13  -1   1    1.54    1.58
  13  -2   1    2.88    1.79
 -13   2  -1    3.51    1.80
 -12   2  -1    0.66    1.37
  12  -2   1    3.20    1.68
 -11   2  -1    1.85    1.14
  11  -2   1    1.34    1.33
 -11   2  -1    2.30    1.31
 -10   2  -1    1.14    1.13
 -10   2  -1   -2.01    0.89
  10  -2   1    0.52    1.26
  -9   2  -1    8.95    1.48
   9  -2   1    9.51    1.61
   9  -2   1    7.91    1.38
  -9   2  -1   10.58    1.30
  -9   2  -1    8.27    1.26
   8  -2   1   16.55    1.53
  -8   2  -1   18.27    1.52
  -8   2  -1   16.28    1.68
  -8   2  -1   15.63    1.54
   8  -2   1   16.17    1.70
  -8   2  -1   19.46    1.86
   8  -2   1   14.92    1.81
  -7   2  -1   46.02    2.66
   7  -2   1   45.51    2.70
   7  -2   1   47.44    2.60
  -7   2  -1   50.27    2.40
   7  -2   1   49.78    2.45
  -7   2  -1   47.22    2.61
  -7   2  -1   48.86    2.40
  -6   2  -1   72.85    3.07
  -6   2  -1   74.22    2.97
  -6   2  -1   66.18    3.22
  -6   2  -1   65.10    3.12
   6  -2   1   65.06    3.25
   6  -2   1   68.89    3.17
   6  -2   1   65.83    2.97
  -6   2  -1   67.45    2.98
   6  -2   1   71.28    3.24
  -5   2  -1  115.09    4.13
   5  -2   1  108.82    4.26
  -5   2  -1  106.04    4.29
  -5   2  -1  108.49    4.26
  -5   2  -1  102.84    4.03
   5  -2   1  102.62    4.32
  -5   2  -1  108.31    4.05
   5  -2   1  103.01    4.26
  -4   2  -1  136.13    4.78
   4  -2   1  135.09    4.97
  -4   2  -1  129.25    4.97
   4  -2   1  137.07    5.00
  -4   2  -1  123.37    4.89
   4  -2   1  132.43    5.03
   4  -2   1  128.71    4.96
  -4   2  -1  134.56    4.76
  -4   2  -1  133.95    4.75
  -3   2  -1  230.91    7.80
   3  -2   1  237.62    7.77
   3  -2   1  230.93    7.92
  -3   2  -1  226.15    8.05
   3  -2   1  231.66    8.12
  -3   2  -1  237.43    7.81
   3  -2   1  218.68    7.76
   3  -2   1  227.79    8.11
  -3   2  -1  237.65    8.11
  -3   2  -1  230.20    7.94
   3  -2   1  239.37    8.10
   2  -2   1  474.09   16.97
  -2   2  -1  509.58   16.56
   2  -2   1  466.20   16.54
   2  -2   1  471.30   16.58
   2  -2   1  475.55   15.99
  -2   2  -1  482.29   16.02
  -2   2  -1  489.65   16.55
   2  -2   1  527.52   16.55
  -2   2  -1  549.65   16.08
  -2   2  -1  477.62   16.52
  -1   2  -1 1159.33   38.66
   1  -2   1 1181.07   37.65
   1  -2   1 1185.07   38.84
   1  -2   1 1185.56   37.62
  -1   2  -1 1202.56   38.82
  -1   2  -1 1144.59   38.81
   1  -2   1 1132.87   38.85
   1  -2   1 1116.19   38.72
  -1   2  -1 1182.88   37.62
  -1   2  -1 1173.19   37.67
  -1   2  -1 1202.57   38.71
   0   2  -1  141.92    4.96
   0  -2   1  145.51    5.01
   0   2  -1  148.34    5.02
   0   2  -1  137.73    4.96
   0   2  -1  144.51    4.83
   0  -2   1  144.75    5.01
   0   2  -1  140.91    4.97
   0  -2   1  152.22    4.80
   0   2  -1  142.21    4.79
   0  -2   1  141.24    5.00
   0  -2   1  144.77    4.77
   1   2  -1   42.98    1.58
  -1  -2   1   44.38    1.58
  -1  -2   1   42.41    1.54
   1   2  -1   41.70    1.66
   1   2  -1   41.19    1.67
   1   2  -1   42.60    1.71
  -1  -2   1   41.41    1.69
  -1  -2   1   41.57    1.73
  -1  -2   1   43.05    1.71
   1   2  -1   43.27    1.64
  -2  -2   1  163.04    5.29
  -2  -2   1  165.66    5.58
   2   2  -1  156.81    5.57
   2   2  -1  152.85    5.38
   2   2  -1  154.67    5.55
   2   2  -1  160.99    5.34
  -2  -2   1  153.73    5.57
  -2  -2   1  155.44    5.60
  -2  -2   1  155.18    5.57
   3   2  -1  478.56   15.53
   3   2  -1  473.80   16.08
  -3  -2   1  477.64   15.46
   3   2  -1  471.84   15.60
  -3  -2   1  494.67   16.16
  -3  -2   1  466.22   16.11
  -3  -2   1  455.31   16.11
   3   2  -1  471.17   16.07
  -3  -2   1  462.58   16.09
  -3  -2   1  493.22   16.06
  -4  -2   1   69.03    2.86
  -4  -2   1   62.93    2.89
  -4  -2   1   67.05    2.84
  -4  -2   1   63.85    2.86
  -4  -2   1   66.92    2.56
   4   2  -1   63.90    2.70
   4   2  -1   72.05    2.66
   4   2  -1   62.22    2.76
   4   2  -1   69.28    2.87
   5   2  -1  145.22    5.36
   5   2  -1  148.53    5.51
   5   2  -1  144.61    5.26
  -5  -2   1  144.71    5.56
  -5  -2   1  136.81    5.54
   5   2  -1  143.65    5.56
  -5  -2   1  157.72    5.58
  -5  -2   1  136.67    5.62
  -5  -2   1  142.38    5.14
  -6  -2   1   49.81    2.56
  -6  -2   1   50.71    2.61
   6   2  -1   48.89    2.62
   6   2  -1   47.54    2.47
  -6  -2   1   50.32    2.24
  -6  -2   1   47.46    2.60
   6   2  -1   50.15    2.36
   6   2  -1   49.75    2.47
  -6  -2   1   48.94    2.62
   7   2  -1  232.17    8.62
   7   2  -1  237.80    8.53
  -7  -2   1  260.63    9.12
  -7  -2   1  227.93    9.04
  -7  -2   1  235.81    8.31
   7   2  -1  240.29    8.87
   7   2  -1  230.75    8.98
  -7  -2   1  233.66    8.99
  -7  -2   1  229.97    8.94
   8   2  -1  358.42   12.68
  -8  -2   1  356.84   13.20
   8   2  -1  364.72   13.23
  -8  -2   1  344.98   13.15
  -8  -2   1  366.48   13.35
  -9  -2   1   21.77    2.12
  -9  -2   1   24.17    2.35
   9   2  -1   22.46    2.25
  -9  -2   1   20.05    2.06
   9   2  -1   22.79    2.02
  10   2  -1   16.72    2.03
 -10  -2   1   15.67    1.93
 -10  -2   1   17.27    1.97
 -11  -2   1   -0.13    1.11
 -12  -2   1   -0.90    1.18
 -13  -2   1   -0.94    1.31
 -13   3  -1    1.38    1.63
  13  -3   1    0.77    1.73
  12  -3   1    4.58    1.85
 -12   3  -1    4.51    1.71
 -11   3  -1    4.72    1.55
  11  -3   1    4.00    1.66
 -10   3  -1    1.06    0.88
  10  -3   1   -0.05    1.12
 -10   3  -1    0.00    1.02
   9  -3   1    0.30    0.95
   9  -3   1    0.68    1.14
  -9   3  -1    1.16    1.08
  -9   3  -1    1.47    0.87
  -9   3  -1   -0.59    0.81
   8  -3   1   -0.27    0.41
   8  -3   1    2.31    1.13
  -8   3  -1    0.70    0.80
   8  -3   1   -0.20    0.83
  -8   3  -1   -0.87    0.67
  -8   3  -1    0.03    0.88
  -8   3  -1   -0.57    0.66
  -7   3  -1   20.59    1.40
  -7   3  -1   18.59    1.75
  -7   3  -1   17.85    1.66
   7  -3   1   22.53    1.74
  -7   3  -1   17.05    1.53
   7  -3   1   20.02    1.71
  -7   3  -1   21.56    1.65
   7  -3   1   19.10    1.85
   6  -3   1  115.71    4.56
  -6   3  -1  116.26    4.36
  -6   3  -1  112.29    4.28
   6  -3   1  104.71    4.50
  -6   3  -1  105.03    4.43
   6  -3   1  105.99    4.61
  -6   3  -1  106.45    4.18
  -6   3  -1  101.10    4.50
   6  -3   1  108.20    4.24
  -5   3  -1   28.32    1.75
  -5   3  -1   29.56    1.59
  -5   3  -1   28.99    1.63
   5  -3   1   30.24    1.59
   5  -3   1   30.33    1.75
  -5   3  -1   28.65    1.68
  -5   3  -1   28.96    1.39
   5  -3   1   26.58    1.70
   5  -3   1   27.86    1.81
   5  -3   1   30.30    1.72
  -4   3  -1  423.48   14.24
   4  -3   1  429.00   14.19
   4  -3   1  416.31   14.78
   4  -3   1  419.63   14.76
  -4   3  -1  438.86   14.76
  -4   3  -1  421.45   14.53
  -4   3  -1  433.09   14.25
   4  -3   1  460.58   14.79
  -4   3  -1  422.94   14.70
  -3   3  -1  273.93    9.45
   3  -3   1  278.73    9.07
   3  -3   1  259.08    9.45
  -3   3  -1  269.68    9.12
   3  -3   1  267.13    9.48
  -3   3  -1  280.46    9.13
   3  -3   1  269.68    9.45
  -3   3  -1  265.72    9.39
   3  -3   1  281.52    9.45
  -2   3  -1    1.71    0.37
   1  -3   1  121.64    4.53
   1  -3   1  126.58    4.54
  -1   3  -1  126.05    4.36
  -1   3  -1  126.56    4.48
  -1   3  -1  129.71    4.53
  -1   3  -1  127.97    4.33
   1  -3   1  126.67    4.26
   1  -3   1  132.97    4.54
   0  -3   1    2.86    0.37
   0   3  -1    3.50    0.35
   0   3  -1    2.53    0.30
   0   3  -1    2.59    0.37
   0   3  -1    3.46    0.35
   0  -3   1    2.98    0.27
   0  -3   1    1.78    0.28
   0  -3   1    2.84    0.40
   0  -3   1    3.41    0.39
  -1  -3   1  525.00   16.72
   1   3  -1  496.54   16.09
  -1  -3   1  484.49   16.65
   1   3  -1  493.79   16.61
  -1  -3   1  495.10   16.07
   1   3  -1  489.73   16.15
  -1  -3   1  488.31   16.69
   1   3  -1  495.32   16.62
   2   3  -1  447.36   14.35
   2   3  -1  439.16   14.41
   2   3  -1  438.04   14.84
  -2  -3   1  433.02   14.90
  -2  -3   1  438.48   14.25
  -2  -3   1  434.49   14.87
  -2  -3   1  457.49   14.93
  -2  -3   1  425.17   15.04
   2   3  -1  441.90   14.83
   3   3  -1   38.53    1.69
   3   3  -1   38.83    1.80
   3   3  -1   38.98    1.72
  -3  -3   1   35.52    1.76
  -3  -3   1   37.69    1.51
  -3  -3   1   34.84    1.87
  -3  -3   1   38.52    1.78
  -3  -3   1   39.72    1.80
   3   3  -1   36.82    1.61
  -3  -3   1   34.61    1.74
   4   3  -1    5.59    0.71
  -4  -3   1    3.82    0.74
   4   3  -1    4.66    0.74
  -4  -3   1    5.14    0.73
   4   3  -1    4.69    0.63
  -4  -3   1    6.21    0.58
  -4  -3   1    4.80    0.80
   4   3  -1    4.39    0.67
  -4  -3   1    4.82    0.71
  -4  -3   1    4.87    0.71
  -5  -3   1   26.11    1.73
  -5  -3   1   24.45    1.31
   5   3  -1   24.10    1.47
  -5  -3   1   24.38    1.63
   5   3  -1   21.43    1.52
  -5  -3   1   25.54    1.66
   5   3  -1   23.99    1.58
   5   3  -1   25.01    1.69
  -5  -3   1   23.05    1.68
  -5  -3   1   24.39    1.62
   6   3  -1   10.65    1.10
  -6  -3   1   10.09    1.25
  -6  -3   1    5.81    0.89
   6   3  -1    9.63    1.08
  -6  -3   1    9.85    1.06
   6   3  -1   10.08    1.01
  -6  -3   1    9.41    1.25
   6   3  -1   11.32    1.22
  -6  -3   1    9.47    1.12
   7   3  -1   50.03    2.92
   7   3  -1   48.82    2.69
  -7  -3   1   51.97    2.96
  -7  -3   1   45.66    2.76
  -7  -3   1   49.29    2.91
   8   3  -1    5.88    1.40
  -8  -3   1    5.43    1.38
  -8  -3   1    8.67    1.40
  -8  -3   1    6.83    1.44
   8   3  -1    7.91    1.28
  -9  -3   1    1.05    0.91
  -9  -3   1    0.54    1.04
   9   3  -1    2.12    1.06
   9   3  -1    0.97    0.90
 -10  -3   1    0.27    1.03
  10   3  -1   -0.29    0.87
 -10  -3   1    0.02    1.05
 -11  -3   1   -0.35    1.16
 -12  -3   1    2.03    1.42
  13  -4   1    0.56    1.85
  12  -4   1   -1.01    1.52
 -12   4  -1   -0.72    1.37
  11  -4   1    3.56    1.65
 -11   4  -1    1.52    1.44
 -10   4  -1    0.54    1.21
  10  -4   1    1.77    1.32
   9  -4   1    1.21    1.09
  -9   4  -1   -0.49    0.82
   9  -4   1    0.62    1.18
  -9   4  -1    0.06    1.06
  -9   4  -1    0.00    0.74
  -8   4  -1   -0.29    0.77
   8  -4   1   -0.06    0.89
   8  -4   1   -1.19    0.94
  -8   4  -1   -0.30    0.92
  -8   4  -1    0.43    0.63
  -7   4  -1   23.09    1.88
   7  -4   1   27.65    1.88
   7  -4   1   23.75    2.14
   7  -4   1   24.92    2.03
  -7   4  -1   27.50    2.09
   7  -4   1   24.84    2.02
  -7   4  -1   23.20    1.50
  -7   4  -1   24.96    1.79
  -7   4  -1   27.89    1.97
   6  -4   1    5.97    1.10
   6  -4   1    4.36    0.96
  -6   4  -1    5.69    0.93
   6  -4   1    5.55    0.81
  -6   4  -1    5.29    0.90
  -6   4  -1    6.44    0.68
  -6   4  -1    6.01    0.89
   6  -4   1    5.71    0.93
  -6   4  -1    4.83    0.99
  -5   4  -1   76.52    3.38
   5  -4   1   73.19    3.40
  -5   4  -1   74.96    3.26
  -5   4  -1   71.34    3.10
  -5   4  -1   77.59    3.18
   5  -4   1   71.75    3.34
  -5   4  -1   73.74    2.81
   5  -4   1   75.14    3.04
   5  -4   1   80.78    3.37
   4  -4   1   25.43    1.61
  -4   4  -1   25.31    1.61
   4  -4   1   24.61    1.66
  -4   4  -1   24.29    1.47
  -4   4  -1   34.59    1.61
  -4   4  -1   27.86    1.57
   4  -4   1   28.91    1.43
   4  -4   1   29.82    1.74
   4  -4   1   27.68    1.62
   3  -4   1   83.47    3.32
   3  -4   1   78.40    3.32
  -3   4  -1   81.55    3.20
  -3   4  -1   85.92    3.16
   3  -4   1   82.91    3.01
  -3   4  -1   80.54    3.29
   3  -4   1   80.81    3.32
  -3   4  -1   83.09    3.15
   3  -4   1   85.14    3.32
   2  -4   1  335.12   11.65
  -2   4  -1  327.11   11.21
  -2   4  -1  336.00   11.53
   2  -4   1  338.37   11.62
  -2   4  -1  345.94   11.61
  -2   4  -1  333.17   11.20
   2  -4   1  358.70   11.66
   1  -4   1  153.73    5.64
   1  -4   1  161.80    5.51
  -1   4  -1  159.00    5.61
   1  -4   1  156.72    5.61
   1  -4   1  165.16    5.66
  -1   4  -1  164.68    5.40
   1  -4   1  154.02    5.64
  -1   4  -1  157.24    5.42
   0  -4   1   12.31    0.85
   0   4  -1   12.69    0.72
   0  -4   1   12.91    0.77
   0   4  -1   13.52    0.76
   0   4  -1   12.65    0.83
   0  -4   1   13.28    0.83
   0  -4   1   13.82    0.85
   0  -4   1   12.97    0.84
  -1  -4   1  500.78   17.47
  -1  -4   1  496.90   17.41
   1   4  -1  512.54   16.90
  -1  -4   1  529.85   17.37
   1   4  -1  516.18   16.83
  -1  -4   1  519.18   17.61
  -1  -4   1  541.85   17.50
   1   4  -1  529.16   17.41
   2   4  -1  594.05   19.71
  -2  -4   1  621.94   19.84
  -2  -4   1  589.41   20.00
  -2  -4   1  571.15   19.78
  -2  -4   1  582.42   19.74
   2   4  -1  590.15   19.16
   2   4  -1  601.27   19.08
  -2  -4   1  542.96   19.63
   3   4  -1    3.73    0.50
  -3  -4   1    3.06    0.58
  -3  -4   1    2.76    0.57
  -3  -4   1    3.84    0.60
   3   4  -1    2.45    0.50
   3   4  -1    3.38    0.59
  -3  -4   1    2.80    0.67
  -4  -4   1   75.23    3.34
   4   4  -1   77.06    3.24
   4   4  -1   78.91    2.99
  -4  -4   1   70.75    3.11
  -4  -4   1   74.30    3.21
  -4  -4   1   71.23    3.17
  -4  -4   1   75.62    3.24
  -4  -4   1   76.63    3.24
   4   4  -1   73.28    3.06
  -5  -4   1    0.31    0.55
   5   4  -1    0.75    0.54
   5   4  -1    0.24    0.59
   5   4  -1    0.49    0.51
  -5  -4   1   -0.12    0.58
  -5  -4   1    0.04    0.48
  -5  -4   1    0.60    0.59
  -5  -4   1   -0.34    0.61
  -6  -4   1   13.99    1.32
   6   4  -1   13.69    1.38
   6   4  -1   11.80    1.16
  -6  -4   1   13.77    1.37
  -6  -4   1   12.19    1.46
   6   4  -1   12.90    1.24
  -6  -4   1    8.95    1.27
  -6  -4   1   14.22    1.38
   7   4  -1   22.96    1.92
  -7  -4   1   19.68    1.76
   7   4  -1   18.60    1.70
  -7  -4   1   19.19    1.91
  -7  -4   1   18.92    1.90
  -8  -4   1    6.97    1.27
  -8  -4   1    7.92    1.49
  -8  -4   1    6.63    1.35
   8   4  -1    7.54    1.22
  -9  -4   1    1.76    1.01
  -9  -4   1    1.12    1.02
   9   4  -1   -0.21    0.82
  10   4  -1    0.45    0.99
 -10  -4   1    0.13    1.09
 -10  -4   1    0.18    1.03
 -11  -4   1    2.10    1.35
 -12  -4   1    0.69    1.33
  13  -5   1    1.15    1.84
  12  -5   1    0.36    1.52
  11  -5   1   13.90    2.22
 -10   5  -1    3.46    1.35
  10  -5   1    1.17    1.30
  -9   5  -1   12.54    1.51
   9  -5   1   11.18    1.81
  -9   5  -1   12.93    1.73
   9  -5   1   12.07    1.74
  -8   5  -1    0.44    0.84
  -8   5  -1   -0.10    0.61
   8  -5   1    0.40    0.98
  -8   5  -1   -0.45    1.00
   8  -5   1    0.00    1.07
  -7   5  -1   25.16    1.84
  -7   5  -1   26.96    1.42
  -7   5  -1   25.14    2.03
   7  -5   1   27.97    2.17
   7  -5   1   24.56    2.03
  -6   5  -1   26.50    1.94
  -6   5  -1   24.44    1.70
   6  -5   1   23.76    1.94
  -6   5  -1   25.49    1.78
   6  -5   1   28.75    1.85
  -6   5  -1   26.31    1.74
   6  -5   1   24.91    1.86
   5  -5   1   31.82    1.90
  -5   5  -1   32.23    1.78
   5  -5   1   28.64    1.95
  -5   5  -1   31.04    1.78
  -5   5  -1   30.73    1.74
   5  -5   1   29.02    1.84
  -5   5  -1   29.64    1.85
   5  -5   1   31.03    1.87
   4  -5   1    1.49    0.65
  -4   5  -1    1.24    0.58
  -4   5  -1    1.88    0.54
  -4   5  -1    0.64    0.49
   4  -5   1    1.97    0.62
   4  -5   1    1.78    0.61
   4  -5   1    0.58    0.60
  -3   5  -1   22.19    1.27
  -3   5  -1   19.99    1.28
   3  -5   1   18.87    1.36
   3  -5   1   20.72    1.42
   3  -5   1   14.77    1.41
  -3   5  -1   21.05    1.41
  -2   5  -1  183.92    6.28
   2  -5   1  184.03    6.52
   2  -5   1  178.18    6.56
  -2   5  -1  185.61    6.54
  -2   5  -1  179.37    6.29
   2  -5   1  178.28    6.54
   2  -5   1  187.70    6.57
   1  -5   1    8.30    0.74
  -1   5  -1    9.74    0.71
   1  -5   1    8.66    0.82
   1  -5   1    7.92    0.57
  -1   5  -1    7.89    0.69
   1  -5   1    8.35    0.78
   1  -5   1    8.52    0.77
  -1   5  -1   10.43    0.86
   0   5  -1   34.94    1.63
   0   5  -1   34.76    1.46
   0  -5   1   34.50    1.57
   0  -5   1   32.32    1.60
   0  -5   1   36.01    1.64
   0  -5   1   34.25    1.62
   0   5  -1   35.41    1.52
   0  -5   1   36.21    1.60
   1   5  -1   55.83    2.23
  -1  -5   1   56.26    2.35
   1   5  -1   58.93    2.38
  -1  -5   1   58.03    2.38
  -1  -5   1   53.92    2.40
  -1  -5   1   54.15    2.34
  -1  -5   1   56.26    2.27
   1   5  -1   58.08    2.17
   2   5  -1   13.37    0.87
   2   5  -1   14.08    1.06
   3   5  -1  170.84    5.92
  -3  -5   1  167.36    6.26
  -3  -5   1  180.95    6.33
  -3  -5   1  167.51    6.45
  -3  -5   1  160.56    6.17
   3   5  -1  171.14    6.22
  -3  -5   1  171.50    6.14
   3   5  -1  168.58    6.02
  -4  -5   1   33.42    1.88
   4   5  -1   30.35    1.74
  -4  -5   1   35.14    1.91
   4   5  -1   35.03    1.69
  -4  -5   1   33.32    1.89
   4   5  -1   35.10    1.88
  -4  -5   1   31.69    1.99
  -5  -5   1   31.22    2.06
  -5  -5   1   27.32    1.85
   5   5  -1   31.04    1.71
   5   5  -1   29.82    1.92
  -5  -5   1   29.20    1.91
  -5  -5   1   32.77    1.95
   5   5  -1   30.15    1.79
  -6  -5   1   14.64    1.61
   6   5  -1   16.02    1.60
  -6  -5   1   14.61    1.48
   6   5  -1   16.94    1.40
  -6  -5   1   14.81    1.45
  -6  -5   1   16.02    1.61
   6   5  -1   14.29    1.36
   7   5  -1    4.45    1.00
  -7  -5   1    2.20    0.90
  -7  -5   1    2.73    1.05
  -7  -5   1    2.83    1.14
  -8  -5   1    3.23    1.12
   8   5  -1    2.58    0.94
  -8  -5   1    1.55    0.96
  -9  -5   1    4.12    1.30
  -9  -5   1    2.82    1.08
   9   5  -1    4.51    1.19
  10   5  -1    1.31    1.07
 -10  -5   1    2.25    1.20
 -10  -5   1    0.98    1.22
 -11  -5   1    2.04    1.41
 -12  -5   1    1.87    1.41
  12  -6   1    1.67    1.67
  11  -6   1    9.18    2.01
  10  -6   1   -0.58    1.24
  10  -6   1   -0.64    1.17
  -9   6  -1    0.96    0.97
   9  -6   1    1.90    1.18
   9  -6   1    1.12    1.18
   8  -6   1    0.46    1.00
   8  -6   1    1.20    1.12
  -8   6  -1   -0.24    0.84
  -8   6  -1    0.36    1.01
   7  -6   1   13.36    1.69
  -7   6  -1   16.11    1.53
  -7   6  -1   13.88    1.57
   7  -6   1   12.39    1.56
  -6   6  -1   27.31    1.84
   6  -6   1   26.25    1.93
   6  -6   1   24.74    2.03
   6  -6   1   27.97    1.99
  -6   6  -1   25.68    1.73
  -6   6  -1   24.12    1.87
   5  -6   1   54.03    2.76
  -5   6  -1   54.42    2.71
  -5   6  -1   56.82    2.62
   5  -6   1   50.45    2.72
   5  -6   1   57.46    2.73
   5  -6   1   51.10    2.74
  -5   6  -1   55.78    2.59
  -4   6  -1    6.91    0.84
   4  -6   1    6.29    0.95
  -4   6  -1    6.29    0.92
   4  -6   1    6.76    0.97
   4  -6   1    6.48    0.89
  -4   6  -1    6.46    0.80
   3  -6   1  104.78    4.30
   3  -6   1  115.08    4.42
   3  -6   1  111.93    4.43
   3  -6   1  107.61    4.38
  -3   6  -1  111.04    4.20
  -3   6  -1  111.01    4.37
  -3   6  -1  112.91    4.17
   2  -6   1   43.88    2.05
   2  -6   1   36.56    2.00
   2  -6   1   44.59    2.05
  -2   6  -1   40.06    1.87
  -2   6  -1   41.70    1.88
  -2   6  -1   38.76    2.01
   2  -6   1   41.96    2.05
  -1   6  -1   21.50    1.17
   1  -6   1   19.77    1.29
   1  -6   1   22.67    1.07
  -1   6  -1   21.51    1.20
  -1   6  -1   23.32    1.31
   1  -6   1   20.63    1.25
   1  -6   1   22.45    1.34
   1  -6   1   22.11    1.33
   0  -6   1   23.26    1.36
   0   6  -1   24.29    1.37
   0  -6   1   24.44    1.31
   0   6  -1   25.34    1.22
   0  -6   1   24.47    1.31
   0  -6   1   22.05    1.33
   0   6  -1   25.76    1.29
   0  -6   1   26.05    1.41
  -1  -6   1   47.59    2.10
   1   6  -1   44.41    1.94
   1   6  -1   44.93    1.94
  -1  -6   1   44.27    1.95
   1   6  -1   45.45    1.86
  -1  -6   1   43.45    2.11
  -1  -6   1   44.18    2.07
   1   6  -1   45.75    2.05
  -1  -6   1   43.41    2.01
  -2  -6   1   18.28    1.19
  -2  -6   1   19.01    1.25
   2   6  -1   17.35    1.04
  -2  -6   1   19.03    1.27
   2   6  -1   17.52    1.24
  -2  -6   1   17.49    1.15
   2   6  -1   17.14    1.13
  -2  -6   1   17.61    1.33
   3   6  -1   41.21    2.05
  -3  -6   1   40.42    1.92
  -3  -6   1   42.45    2.09
   3   6  -1   39.48    1.83
  -3  -6   1   37.26    1.97
  -3  -6   1   40.39    2.20
   3   6  -1   37.48    1.93
  -3  -6   1   38.93    2.05
  -4  -6   1   -0.46    0.43
  -4  -6   1   -0.44    0.54
   4   6  -1   -0.23    0.39
  -4  -6   1    0.17    0.52
   4   6  -1   -0.35    0.46
  -4  -6   1    0.07    0.65
  -4  -6   1   -0.71    0.54
   4   6  -1    0.73    0.56
  -5  -6   1    2.76    0.86
  -5  -6   1    1.92    0.76
  -5  -6   1    3.21    0.92
   5   6  -1    2.90    0.68
  -5  -6   1    3.25    0.91
   5   6  -1    3.89    0.82
  -5  -6   1    2.76    1.02
  -6  -6   1   33.33    2.40
   6   6  -1   32.12    2.06
  -6  -6   1   37.37    2.28
  -6  -6   1   32.66    2.21
  -7  -6   1   -1.08    0.76
  -7  -6   1   -0.46    0.74
  -7  -6   1   -0.88    0.88
   7   6  -1    0.48    0.70
   8   6  -1   -0.54    0.68
  -8  -6   1    0.43    0.97
  -8  -6   1   -0.51    0.76
   9   6  -1    1.19    0.96
  -9  -6   1   -0.24    1.11
  -9  -6   1    0.46    1.04
 -10  -6   1    2.24    1.27
 -10  -6   1    0.18    1.24
  10   6  -1    2.01    1.17
 -11  -6   1    3.37    1.49
 -11  -6   1    5.09    1.53
  12  -7   1    1.56    1.67
  11  -7   1   14.45    2.33
  10  -7   1    4.55    1.66
  10  -7   1    5.71    1.63
   9  -7   1    1.99    1.33
  -9   7  -1    3.16    1.19
   9  -7   1    3.00    1.45
   8  -7   1    3.27    1.26
   8  -7   1    1.21    1.30
  -8   7  -1    1.45    1.02
   7  -7   1   -1.24    1.02
   7  -7   1    0.12    1.01
  -7   7  -1    0.12    0.83
   6  -7   1   13.64    1.62
  -6   7  -1   15.41    1.47
   6  -7   1   16.58    1.65
  -5   7  -1    1.68    0.74
  -5   7  -1    1.48    0.70
  -5   7  -1    1.78    0.83
   5  -7   1    2.28    0.87
   5  -7   1    2.53    0.93
   5  -7   1    1.37    0.79
   4  -7   1   79.68    3.37
   4  -7   1   70.25    3.25
  -4   7  -1   75.19    3.14
  -4   7  -1   71.15    3.24
   4  -7   1   69.97    3.31
  -4   7  -1   70.64    3.10
   4  -7   1   69.65    3.18
  -3   7  -1   34.74    1.89
   3  -7   1   33.41    1.88
   3  -7   1   34.33    1.88
  -3   7  -1   33.27    1.77
  -3   7  -1   29.27    1.72
   3  -7   1   35.33    1.93
   3  -7   1   33.38    1.91
   2  -7   1    2.61    0.64
   2  -7   1    3.27    0.72
  -2   7  -1    3.00    0.60
   2  -7   1    4.47    0.75
   2  -7   1    4.19    0.74
  -2   7  -1    3.37    0.71
  -2   7  -1    4.83    0.69
   1  -7   1    0.64    0.55
  -1   7  -1    0.19    0.44
  -1   7  -1    0.40    0.45
   1  -7   1    0.50    0.51
   1  -7   1    0.26    0.50
   1  -7   1    0.07    0.35
   1  -7   1   -0.20    0.45
  -1   7  -1    0.49    0.52
   0  -7   1   20.41    1.30
   0  -7   1   21.32    1.25
   0   7  -1   20.59    1.25
   0   7  -1   19.31    1.35
   0  -7   1   19.83    1.35
   0   7  -1   21.12    1.20
   0  -7   1   19.26    1.33
   0  -7   1   22.20    1.28
  -1  -7   1    1.54    0.61
   1   7  -1    1.73    0.48
   1   7  -1    1.74    0.52
  -1  -7   1    1.57    0.52
  -1  -7   1    3.62    0.62
   1   7  -1    1.62    0.56
  -1  -7   1    2.02    0.59
  -1  -7   1    2.87    0.68
  -1  -7   1    2.58    0.64
   2   7  -1    2.41    0.52
   2   7  -1    1.93    0.58
  -2  -7   1    1.42    0.60
  -2  -7   1    2.99    0.77
   2   7  -1    2.55    0.58
  -2  -7   1    2.96    0.66
  -2  -7   1    3.49    0.64
  -2  -7   1    1.96    0.53
   3   7  -1    2.05    0.63
  -3  -7   1    2.21    0.58
  -3  -7   1    1.51    0.74
  -3  -7   1    1.48    0.67
  -3  -7   1    1.95    0.68
  -3  -7   1    2.41    0.73
   3   7  -1    2.04    0.54
   4   7  -1   18.45    1.42
  -4  -7   1   14.95    1.39
  -4  -7   1   15.94    1.44
  -4  -7   1   17.98    1.33
  -4  -7   1   16.73    1.47
  -4  -7   1   15.11    1.53
   4   7  -1   15.45    1.19
  -5  -7   1    2.01    0.92
  -5  -7   1    1.96    0.91
   5   7  -1    1.28    0.77
  -5  -7   1    2.05    1.02
   5   7  -1    0.63    0.63
  -5  -7   1    2.32    0.87
  -5  -7   1    0.47    0.79
  -6  -7   1    1.69    0.88
  -6  -7   1   -0.48    0.79
   6   7  -1    0.43    0.75
  -6  -7   1    0.16    0.99
  -7  -7   1    1.14    0.94
  -7  -7   1    0.69    0.85
   7   7  -1    1.10    0.87
   8   7  -1    0.99    0.86
  -8  -7   1    0.06    0.94
  -8  -7   1   -0.92    0.79
  -9  -7   1    4.85    1.34
  -9  -7   1    5.28    1.45
   9   7  -1    4.46    1.26
  10   7  -1    9.29    1.67
 -10  -7   1    9.79    1.77
 -10  -7   1    9.17    1.73
  11  -8   1   -0.77    1.47
  10  -8   1    1.54    1.56
  10  -8   1    3.77    1.57
  -9   8  -1    0.48    1.06
   9  -8   1    0.07    1.17
   9  -8   1    0.76    1.34
   8  -8   1   22.29    2.24
   8  -8   1   19.69    2.12
  -8   8  -1   19.40    1.91
   7  -8   1   -1.89    0.90
  -7   8  -1    1.04    0.93
   7  -8   1   -0.22    0.98
   6  -8   1    1.60    0.99
  -6   8  -1    0.28    0.84
   6  -8   1    1.25    1.02
   5  -8   1    0.04    0.77
  -5   8  -1    0.35    0.70
   5  -8   1   -1.17    0.70
   5  -8   1   -0.39    0.72
   4  -8   1   -0.83    0.59
  -4   8  -1   -1.33    0.54
   4  -8   1    0.68    0.73
  -4   8  -1   -0.57    0.60
   4  -8   1   -0.40    0.64
  -3   8  -1    7.59    0.93
   3  -8   1    8.17    1.06
  -3   8  -1    6.94    0.91
   3  -8   1    7.70    1.00
   3  -8   1    9.39    1.04
   3  -8   1   10.31    1.04
  -2   8  -1  141.97    5.10
   2  -8   1  133.98    5.36
  -2   8  -1  131.19    5.11
   2  -8   1  146.30    5.41
   2  -8   1  143.76    5.20
   2  -8   1  130.05    5.17
   1  -8   1   16.38    1.40
   1  -8   1   17.95    1.45
   1  -8   1   15.91    1.33
  -1   8  -1   14.88    1.25
  -1   8  -1   16.24    1.25
   1  -8   1   14.74    1.27
   0  -8   1   33.41    1.67
   0   8  -1   31.43    1.69
   0  -8   1   29.61    1.65
   0  -8   1   30.83    1.83
   0  -8   1   32.45    1.88
   0  -8   1   31.16    1.70
   0   8  -1   30.72    1.62
  -1  -8   1   -0.25    0.62
   1   8  -1    1.56    0.53
   1   8  -1    0.71    0.56
  -1  -8   1    0.73    0.64
  -1  -8   1    0.78    0.59
  -1  -8   1    0.31    0.53
  -1  -8   1    2.03    0.61
   2   8  -1   10.02    0.98
  -2  -8   1    7.60    1.10
  -2  -8   1    8.31    0.99
  -2  -8   1    9.90    0.88
   2   8  -1    8.27    0.85
  -2  -8   1    8.13    0.86
   2   8  -1    9.28    0.96
  -2  -8   1    8.74    1.01
  -3  -8   1    6.02    1.09
   3   8  -1    6.11    0.92
  -3  -8   1    7.04    1.02
  -3  -8   1    7.75    1.02
   3   8  -1    7.00    0.83
  -3  -8   1    7.13    0.93
  -3  -8   1    5.44    0.76
  -4  -8   1   18.04    1.36
  -4  -8   1   12.25    1.35
  -4  -8   1   14.43    1.45
   4   8  -1   11.63    1.24
  -4  -8   1   13.13    1.56
   4   8  -1   14.00    1.17
  -5  -8   1   21.84    1.90
   5   8  -1   19.81    1.70
  -5  -8   1   21.26    1.98
  -5  -8   1   20.19    1.67
  -5  -8   1   18.02    1.81
  -6  -8   1    4.21    1.13
   6   8  -1    2.50    0.94
  -6  -8   1    2.74    1.02
  -6  -8   1    2.03    1.15
  -7  -8   1    1.35    0.91
  -7  -8   1   -0.19    0.89
   7   8  -1    0.24    0.83
   8   8  -1    0.83    0.93
  -8  -8   1    0.93    0.97
  -8  -8   1   -0.99    1.04
  -9  -8   1    1.27    1.26
  -9  -8   1   -0.17    1.00
   9   8  -1   -0.12    0.91
  10   8  -1    0.91    1.17
 -10  -8   1    1.87    1.32
 -10  -8   1    1.22    1.27
  11  -9   1   -0.01    1.53
  10  -9   1   -1.67    1.38
  10  -9   1   -0.99    1.32
   9  -9   1    3.55    1.46
  -9   9  -1    2.53    1.28
   9  -9   1    2.35    1.46
  -8   9  -1    1.94    1.11
   8  -9   1    2.14    1.32
   8  -9   1    3.90    1.35
   7  -9   1    1.13    1.10
  -7   9  -1    1.55    0.96
   7  -9   1    3.08    1.24
   6  -9   1   -0.88    0.88
   6  -9   1   -0.87    0.93
  -6   9  -1   -1.60    0.71
  -5   9  -1   -0.48    0.67
   5  -9   1   -1.14    0.79
   5  -9   1   -0.86    0.72
   4  -9   1    1.68    0.81
   4  -9   1    0.58    0.81
  -4   9  -1    1.97    0.77
   4  -9   1    2.75    0.88
   3  -9   1    6.99    0.98
  -3   9  -1    6.75    0.96
   3  -9   1    5.13    1.00
   3  -9   1    5.22    1.00
  -3   9  -1    5.80    0.95
   2  -9   1  102.27    4.20
   2  -9   1  103.91    3.96
  -2   9  -1   91.54    3.91
   2  -9   1   93.16    4.14
  -2   9  -1   97.64    3.90
   2  -9   1   93.53    3.87
  -1   9  -1   88.53    3.76
   1  -9   1   87.71    3.93
   1  -9   1   94.88    3.69
   1  -9   1   96.52    4.04
  -1   9  -1   94.49    3.69
   1  -9   1   86.13    3.65
   0  -9   1   14.86    1.22
   0   9  -1   14.29    1.26
   0   9  -1   13.77    1.33
   0  -9   1   15.23    1.38
   0  -9   1   14.36    1.18
   0  -9   1   16.87    1.22
   0  -9   1   14.72    1.38
  -1  -9   1   13.50    1.35
  -1  -9   1   13.53    1.06
  -1  -9   1   11.78    1.10
   1   9  -1   12.23    1.17
  -1  -9   1   13.67    1.28
   1   9  -1   10.89    1.07
  -1  -9   1   14.31    1.34
  -2  -9   1    2.93    0.79
  -2  -9   1    2.63    0.94
  -2  -9   1    2.95    0.66
   2   9  -1    2.53    0.65
  -2  -9   1    1.84    0.64
  -2  -9   1    2.97    0.80
   2   9  -1    4.39    0.82
  -3  -9   1   -0.11    0.56
   3   9  -1    0.58    0.65
  -3  -9   1   -0.77    0.58
  -3  -9   1   -0.40    0.72
   3   9  -1    0.39    0.55
   3   9  -1    0.78    0.66
  -3  -9   1   -0.27    0.65
  -4  -9   1    8.89    1.23
  -4  -9   1   10.68    1.48
  -5  -9   1    0.30    0.87
   5   9  -1   -0.19    0.75
  -5  -9   1   -1.00    0.69
  -5  -9   1    1.55    1.01
  -5  -9   1   -0.97    0.80
  -6  -9   1    1.12    0.87
   6   9  -1    0.17    0.80
  -6  -9   1    2.41    1.04
  -7  -9   1   -0.27    1.01
  -7  -9   1    0.07    0.97
   7   9  -1   -0.42    0.89
  -8  -9   1    0.47    1.12
   8   9  -1    0.08    0.98
  -8  -9   1    0.04    1.04
  -9  -9   1    0.80    1.13
  -9  -9   1    2.06    1.22
   9   9  -1   -1.54    0.93
  10 -10   1   -1.13    1.38
  10 -10   1    1.69    1.53
   9 -10   1    2.43    1.51
  -9  10  -1    0.96    1.23
   9 -10   1    2.12    1.36
  -8  10  -1    5.30    1.44
   8 -10   1    8.60    1.79
   8 -10   1    7.38    1.80
   7 -10   1   -0.70    1.05
   7 -10   1    0.33    1.10
  -7  10  -1    0.16    0.91
  -6  10  -1    4.65    1.23
   6 -10   1    4.64    1.19
   6 -10   1    4.35    1.23
   5 -10   1    2.48    0.98
  -5  10  -1    0.62    0.85
   5 -10   1    2.19    1.00
   4 -10   1    0.09    0.76
   4 -10   1    0.32    0.75
  -4  10  -1    0.27    0.74
  -3  10  -1    2.33    0.85
   3 -10   1    2.98    0.92
   3 -10   1    2.63    0.95
   3 -10   1    4.60    0.84
   2 -10   1    8.71    1.23
   2 -10   1   11.93    1.18
  -2  10  -1    9.76    1.15
  -2  10  -1   10.60    1.13
   2 -10   1   10.95    1.27
   1 -10   1   28.04    2.00
   1 -10   1   27.51    1.89
   1 -10   1   26.50    1.57
   1 -10   1   29.75    1.66
  -1  10  -1   26.52    1.71
  -1  10  -1   25.51    1.75
   0 -10   1    6.94    1.05
   0 -10   1    7.35    1.06
   0 -10   1    5.49    0.74
   0  10  -1    4.32    0.80
   0  10  -1    5.89    0.97
  -1 -10   1    4.78    0.98
   1  10  -1    4.08    0.86
  -1 -10   1    5.96    1.02
   1  10  -1    4.67    0.78
  -2 -10   1    0.11    0.68
  -2 -10   1    1.03    0.81
   2  10  -1    0.90    0.69
  -2 -10   1    0.17    0.70
   2  10  -1    0.06    0.54
  -3 -10   1    0.95    0.90
  -3 -10   1    0.96    0.81
   3  10  -1    1.02    0.73
  -3 -10   1   -0.19    0.77
  -3 -10   1    0.83    0.57
   4  10  -1    0.90    0.74
   4  10  -1    0.42    0.70
  -4 -10   1    0.51    0.94
  -4 -10   1   -0.10    0.80
  -4 -10   1    0.78    0.66
   5  10  -1    3.29    1.01
  -5 -10   1    2.63    1.11
   5  10  -1    4.06    1.04
  -5 -10   1    3.18    1.11
  -5 -10   1    2.53    0.86
   6  10  -1    1.58    0.94
  -6 -10   1    0.97    1.03
  -6 -10   1    3.05    0.98
   7  10  -1    3.33    1.23
  -7 -10   1    2.62    1.16
  -7 -10   1    1.92    1.27
  -8 -10   1    1.08    1.29
  -8 -10   1    1.83    1.29
   8  10  -1    1.58    1.26
   9 -11   1    1.82    1.41
   9 -11   1    3.08    1.55
  -9  11  -1    1.28    1.26
   8 -11   1   -0.98    1.13
  -8  11  -1    0.38    1.04
   8 -11   1   -0.32    1.16
   7 -11   1   -1.85    1.01
   7 -11   1    0.88    1.19
  -7  11  -1    1.60    1.04
   6 -11   1   -0.63    0.97
   6 -11   1   -0.47    0.99
  -6  11  -1   -0.87    0.91
   5 -11   1    0.78    0.95
   5 -11   1   -0.13    0.83
  -5  11  -1   -0.55    0.76
   4 -11   1    2.20    0.85
   4 -11   1    3.34    1.08
  -4  11  -1    1.81    0.95
   3 -11   1    0.79    0.64
   3 -11   1    0.23    0.79
  -3  11  -1    0.38    0.74
   2 -11   1    3.87    1.01
  -2  11  -1    4.09    0.94
   1 -11   1    0.17    0.78
  -1  11  -1    1.68    0.84
   1 -11   1    0.31    0.91
   0 -11   1   11.66    1.35
   0 -11   1   12.63    1.37
   0  11  -1   11.98    1.29
   1  11  -1    6.04    1.04
  -1 -11   1    4.32    1.04
  -1 -11   1    6.12    1.13
  -2 -11   1    1.87    0.93
   2  11  -1    1.57    0.82
  -3 -11   1    0.47    0.82
   3  11  -1   -1.04    0.65
  -4 -11   1    0.81    0.90
   4  11  -1    1.31    0.85
  -5 -11   1    0.86    1.03
  -5 -11   1   -0.51    1.02
   5  11  -1    0.56    0.85
   5  11  -1   -0.41    0.82
  -6 -11   1   -0.59    1.07
   6  11  -1    1.52    1.06
   6  11  -1    0.36    0.99
   7  11  -1    0.65    1.22
  -7 -11   1    2.17    1.01
   7  11  -1    0.89    1.24
  -7 -11   1    2.61    1.38
   7 -12   1   -0.79    1.03
  -7  12  -1    0.29    0.96
   7 -12   1    0.91    1.24
   6 -12   1   -0.13    0.88
  -6  12  -1    0.24    0.98
   6 -12   1   -1.14    0.97
   5 -12   1    0.31    1.00
   5 -12   1   -0.60    0.74
  -5  12  -1    0.90    0.95
  -4  12  -1    0.34    0.86
   4 -12   1    1.66    0.73
   4 -12   1   -0.39    0.92
   3 -12   1    3.01    1.07
  -3  12  -1    2.96    1.00
   2 -12   1    0.94    0.95
  -2  12  -1   -0.04    0.76
  -1  12  -1    5.70    1.11
   1 -12   1    5.25    1.14
   0 -12   1   13.65    1.51
   0  12  -1   12.96    1.45
  -1 -12   1    1.79    0.99
   1  12  -1    0.60    0.85
  -2 -12   1    0.04    0.90
   2  12  -1    0.62    0.87
  -3 -12   1    1.38    0.92
   3  12  -1   -0.76    0.75
  -4 -12   1   -0.68    0.81
   4  12  -1   -0.44    0.83
   5  12  -1    1.05    0.91
  -5 -12   1   -0.36    1.02
  -5  13  -1    1.82    1.11
   5 -13   1    1.97    1.20
   4 -13   1    0.92    1.04
  -4  13  -1    1.03    1.00
   3 -13   1   -1.27    0.84
  -3  13  -1   -0.54    0.87
  -2  13  -1    0.10    0.85
   2 -13   1   -0.49    0.90
  -1  13  -1    1.50    0.87
   1 -13   1   -0.20    0.84
   0  13  -1    0.69    0.86
   0 -13   1   -1.34    0.76
  -1 -13   1    4.05    1.14
   1  13  -1    2.18    0.99
  -2 -13   1    1.36    0.95
   2  13  -1    0.87    0.90
   3  13  -1   -0.52    0.85
  -3 -13   1    0.14    0.91
   3  14   2    0.02    0.65
  -3 -14  -2   -0.23    0.72
  -3 -14  -2   -0.40    0.71
  -3 -14  -2    0.04    0.87
   2  14   2    1.17    0.68
  -2 -14  -2    1.39    0.80
  -2 -14  -2    1.71    0.72
  -1 -14  -2    2.42    0.77
   1  14   2    0.07    0.67
  -1 -14  -2    2.64    0.91
   0 -14  -2   -0.09    0.67
   0  14   2    0.26    0.61
   0 -14  -2    0.14    0.82
  -1  14   2    1.32    0.74
   1 -14  -2   -0.82    0.82
   1 -14  -2    0.11    0.73
   2 -14  -2    3.92    0.94
  -2  14   2    2.40    0.86
  -3  14   2    0.13    0.75
   3 -14  -2   -1.05    0.75
  -4  14   2    2.36    1.06
   4 -14  -2    1.22    0.87
  -5  14   2    0.33    0.86
   5 -14  -2   -0.25    0.91
  -6 -13  -2   -0.89    0.82
   6  13   2   -0.28    0.73
  -5 -13  -2    1.61    0.91
   5  13   2    1.65    0.86
  -4 -13  -2    7.75    1.16
   4  13   2    6.35    1.03
  -4 -13  -2    7.56    1.20
   3  13   2    1.09    0.64
  -3 -13  -2    0.43    0.66
  -3 -13  -2    0.31    0.70
  -2 -13  -2    2.17    0.75
   2  13   2    3.01    0.65
  -2 -13  -2    2.44    0.78
   2  13   2    2.39    0.71
   1  13   2    0.25    0.57
  -1 -13  -2    0.18    0.61
   1  13   2    0.60    0.48
  -1 -13  -2   -1.06    0.63
   0 -13  -2   -0.62    0.68
   0  13   2    0.10    0.55
   0 -13  -2    0.23    0.61
   0  13   2    0.81    0.51
   1 -13  -2   -0.32    0.62
  -1  13   2    0.23    0.56
  -1  13   2   -0.03    0.60
   1 -13  -2   -0.47    0.78
  -2  13   2    0.05    0.61
   2 -13  -2   -0.27    0.77
   2 -13  -2    0.77    0.74
  -3  13   2    3.78    0.90
   3 -13  -2    5.28    1.02
   4 -13  -2    0.00    0.88
  -4  13   2    0.55    0.87
   5 -13  -2    2.26    1.06
  -5  13   2    2.28    0.97
  -6  13   2   -0.21    0.92
   6 -13  -2    0.90    1.08
   7 -13  -2   -1.74    1.04
  -7  13   2    0.64    1.05
   7 -13  -2   -0.52    0.81
  -7 -12  -2    0.25    0.98
   7  12   2    1.19    0.92
   6  12   2    1.52    0.84
  -6 -12  -2    0.66    0.87
  -5 -12  -2    0.21    0.87
   5  12   2    1.05    0.78
  -5 -12  -2    0.63    0.79
  -4 -12  -2    4.90    0.95
  -4 -12  -2    5.61    1.06
   4  12   2    4.22    0.88
   4  12   2    4.59    0.74
   3  12   2    5.01    0.84
  -3 -12  -2    5.63    0.91
  -3 -12  -2    7.27    0.98
   3  12   2    6.42    0.77
   2  12   2   17.89    1.13
  -2 -12  -2   18.56    1.33
   2  12   2   14.94    1.20
  -2 -12  -2   18.32    1.41
  -1 -12  -2   -0.33    0.58
   1  12   2    0.22    0.50
   1  12   2   -0.16    0.42
  -1 -12  -2   -1.20    0.52
   0  12   2   20.64    1.29
   0 -12  -2   23.99    1.57
   0 -12  -2   21.51    1.43
   0  12   2   19.55    1.30
   1 -12  -2   -0.32    0.58
  -1  12   2   -0.42    0.52
  -1  12   2   -0.28    0.54
   1 -12  -2    0.48    0.72
   2 -12  -2    4.04    0.82
   2 -12  -2    4.72    0.93
  -2  12   2    3.29    0.76
  -2  12   2    3.57    0.74
  -3  12   2   -0.87    0.52
   3 -12  -2    0.06    0.77
  -3  12   2   -0.90    0.64
   3 -12  -2    0.32    0.71
  -4  12   2    6.73    1.07
   4 -12  -2    6.10    1.11
   5 -12  -2    0.50    0.95
  -5  12   2    0.46    0.76
   6 -12  -2   -0.17    1.02
  -6  12   2    1.88    0.96
   6 -12  -2   -0.41    0.71
   7 -12  -2    1.92    1.30
  -7  12   2    2.45    1.13
   7 -12  -2    4.20    1.13
   8 -12  -2    0.96    1.30
   8 -12  -2   -0.80    1.03
  -8  12   2    0.85    1.06
   8  11   2   -0.08    0.88
  -8 -11  -2    0.95    1.00
   7  11   2    3.18    1.02
  -7 -11  -2    4.86    1.18
  -6 -11  -2    0.22    0.77
   6  11   2   -0.46    0.60
   5  11   2    1.08    0.71
  -5 -11  -2    1.64    0.84
  -5 -11  -2    1.16    0.80
  -4 -11  -2    3.40    0.84
  -4 -11  -2    3.50    0.89
   4  11   2    3.72    0.64
   4  11   2    2.91    0.72
  -3 -11  -2   -0.63    0.50
   3  11   2    0.79    0.56
  -3 -11  -2    0.83    0.58
   3  11   2   -0.38    0.42
  -2 -11  -2    0.30    0.58
   2  11   2    0.82    0.50
   2  11   2    1.43    0.46
  -2 -11  -2    0.72    0.57
  -1 -11  -2   18.20    1.26
  -1 -11  -2   21.55    1.39
   1  11   2   21.20    1.14
   1  11   2   19.47    1.17
   0 -11  -2   13.48    1.18
   0 -11  -2   11.16    1.03
   0  11   2   12.37    0.93
   0  11   2   11.08    0.92
  -1  11   2    2.68    0.61
   1 -11  -2    2.31    0.67
  -1  11   2    1.24    0.56
   1 -11  -2    1.93    0.70
   2 -11  -2   20.97    1.57
  -2  11   2   20.05    1.31
  -2  11   2   17.03    1.24
   2 -11  -2   18.80    1.40
   3 -11  -2    6.63    1.02
  -3  11   2    5.02    0.83
  -3  11   2    3.90    0.76
   3 -11  -2    3.61    0.88
   4 -11  -2   -0.77    0.71
   4 -11  -2   -0.17    0.76
  -4  11   2   -0.37    0.65
   5 -11  -2   30.21    2.21
   5 -11  -2   29.68    1.78
  -5  11   2   29.19    1.95
  -6  11   2    5.50    1.18
   6 -11  -2    5.09    1.33
   6 -11  -2    6.16    1.11
   7 -11  -2    2.62    1.25
   7 -11  -2    1.97    1.02
  -7  11   2    2.32    1.09
   8 -11  -2    1.13    1.32
   8 -11  -2   -0.34    1.08
  -8  11   2   -0.27    0.91
   9 -11  -2   -0.31    1.29
  -9  11   2    1.05    1.01
   9 -11  -2   -1.11    1.15
   9  10   2   16.01    1.83
  -9 -10  -2   17.89    1.65
  -9 -10  -2   17.85    2.03
  -8 -10  -2   -0.01    0.84
  -8 -10  -2    1.08    0.69
   8  10   2    1.73    0.90
  -7 -10  -2   -1.01    0.73
   7  10   2    0.22    0.72
  -6 -10  -2    1.19    0.75
  -6 -10  -2    2.14    0.80
   6  10   2    0.15    0.62
  -5 -10  -2    0.09    0.99
  -5 -10  -2    1.30    0.74
   5  10   2    0.18    0.62
  -5 -10  -2    1.86    0.77
   5  10   2    1.86    0.62
   4  10   2   11.41    0.90
   4  10   2    9.20    0.96
  -4 -10  -2   11.76    1.53
  -4 -10  -2   11.24    1.13
  -4 -10  -2   11.62    1.17
   3  10   2   -0.63    0.37
   3  10   2    0.12    0.48
  -3 -10  -2   -0.08    0.57
  -3 -10  -2   -0.18    0.49
  -2 -10  -2   19.63    1.28
  -2 -10  -2   20.16    1.35
   2  10   2   19.77    1.05
   2  10   2   21.00    1.22
  -1 -10  -2   24.21    1.38
  -1 -10  -2   22.17    1.31
   0  10   2   51.06    2.03
   0 -10  -2   49.58    2.19
   0 -10  -2   53.34    2.28
  -1  10   2    2.62    0.56
  -1  10   2    2.69    0.54
   1 -10  -2    4.10    0.70
   1 -10  -2    3.78    0.74
  -2  10   2    2.16    0.57
   2 -10  -2    2.24    0.68
   2 -10  -2    3.57    0.79
  -2  10   2    1.63    0.58
   3 -10  -2   -0.78    0.63
   3 -10  -2    0.32    0.70
  -3  10   2   -0.39    0.53
  -3  10   2    0.38    0.61
  -4  10   2    0.27    0.67
   4 -10  -2    1.05    0.62
   4 -10  -2    2.02    0.82
  -4  10   2    1.48    0.71
   4 -10  -2    1.36    0.63
   4 -10  -2    1.12    0.78
   5 -10  -2    7.43    1.24
   5 -10  -2    8.10    1.10
   5 -10  -2    7.81    1.28
  -5  10   2    9.04    1.15
   6 -10  -2   40.29    2.67
  -6  10   2   39.79    2.44
   6 -10  -2   40.31    2.45
  -7  10   2    7.96    1.31
   7 -10  -2    9.12    1.55
   7 -10  -2    8.93    1.40
   8 -10  -2   10.09    1.72
  -8  10   2    8.78    1.40
   8 -10  -2   10.98    1.70
  -9  10   2    2.00    1.11
   9 -10  -2    2.96    1.36
   9 -10  -2    2.07    1.38
  10 -10  -2   -0.45    1.42
 -10  10   2   -1.59    1.06
  10 -10  -2    0.15    1.41
  10   9   2   -0.03    0.99
 -10  -9  -2    0.44    1.17
 -10  -9  -2    1.45    1.13
   9   9   2    0.69    0.95
  -9  -9  -2    1.26    1.05
  -9  -9  -2   -1.12    0.84
   8   9   2   -0.39    0.78
  -8  -9  -2    0.34    0.79
  -8  -9  -2    0.31    0.88
  -7  -9  -2    4.48    1.06
   7   9   2    3.74    0.90
  -7  -9  -2    5.48    0.89
  -6  -9  -2   -0.22    0.88
   6   9   2    0.73    0.59
   6   9   2    0.30    0.62
  -6  -9  -2   -1.39    0.44
  -6  -9  -2   -0.63    0.60
  -6  -9  -2    0.00    0.65
  -5  -9  -2   -0.42    0.60
  -5  -9  -2   -0.76    0.83
   5   9   2    1.01    0.50
  -5  -9  -2    0.87    0.64
   5   9   2   -0.01    0.53
  -4  -9  -2    1.57    0.65
  -4  -9  -2    1.15    0.62
  -4  -9  -2    0.10    0.82
   4   9   2    1.12    0.51
   4   9   2    1.20    0.43
   3   9   2   -0.25    0.43
   3   9   2   -0.16    0.38
  -3  -9  -2    0.43    0.55
  -3  -9  -2    0.64    0.53
  -3  -9  -2    1.08    0.80
  -2  -9  -2  257.24    8.68
  -2  -9  -2  239.42    8.62
  -1  -9  -2   22.26    1.24
  -1  -9  -2   21.04    1.28
   0  -9  -2   42.69    1.89
   0   9   2   47.54    2.17
   0  -9  -2   43.17    1.92
  -1   9   2   16.24    0.93
   1  -9  -2   17.48    1.13
  -1   9   2   15.59    0.89
  -1   9   2   16.88    1.11
   1  -9  -2   15.43    1.09
   3  -9  -2    2.54    0.73
  -3   9   2    1.76    0.65
   3  -9  -2    1.96    0.67
   3  -9  -2    2.32    0.57
   3  -9  -2    2.49    0.58
  -3   9   2    0.55    0.56
   4  -9  -2    0.40    0.71
  -4   9   2   -0.51    0.67
   4  -9  -2    0.55    0.63
   4  -9  -2   -0.02    0.70
   4  -9  -2   -0.95    0.63
  -4   9   2   -0.14    0.61
   5  -9  -2    6.33    1.12
   5  -9  -2    7.92    1.16
  -5   9   2    5.22    0.97
   5  -9  -2    6.70    1.02
  -5   9   2    3.12    0.88
   6  -9  -2   34.83    2.36
   6  -9  -2   30.80    2.25
  -6   9   2   30.88    2.09
   7  -9  -2    4.30    1.32
   7  -9  -2    3.91    1.28
  -7   9   2    5.64    1.25
   8  -9  -2   -0.14    1.08
   8  -9  -2    0.34    1.08
  -8   9   2    1.00    0.97
   9  -9  -2    0.39    1.18
  -9   9   2    1.68    1.01
   9  -9  -2   -0.35    1.11
  10  -9  -2    3.03    1.56
 -10   9   2    2.76    1.14
  10  -9  -2    1.60    1.53
  11  -9  -2   -1.74    1.41
 -11  -8  -2    0.47    1.09
 -11  -8  -2    0.88    1.23
  11   8   2   -0.61    0.89
 -10  -8  -2    0.59    1.01
 -10  -8  -2    1.19    1.14
  10   8   2    0.47    0.92
   9   8   2   18.80    1.85
  -9  -8  -2   24.38    2.06
  -9  -8  -2   21.07    2.06
  -8  -8  -2    1.06    0.90
  -8  -8  -2    0.40    0.86
   8   8   2   -0.21    0.79
   7   8   2    2.49    0.85
  -7  -8  -2    3.84    1.25
  -7  -8  -2    2.55    0.86
  -7  -8  -2    2.49    0.92
  -6  -8  -2    9.80    1.48
  -6  -8  -2    9.47    1.14
  -6  -8  -2    9.01    0.93
   6   8   2    8.93    0.96
  -6  -8  -2    9.78    0.99
   6   8   2    9.25    1.05
  -6  -8  -2    9.88    1.17
  -5  -8  -2    9.05    0.90
   5   8   2    7.92    0.88
  -5  -8  -2    8.20    1.00
  -5  -8  -2    8.53    0.97
   5   8   2    7.69    0.81
  -5  -8  -2    9.26    0.89
  -5  -8  -2    7.22    1.29
   4   8   2    7.52    0.73
  -4  -8  -2    6.71    1.12
  -4  -8  -2    6.42    0.84
   4   8   2    6.50    0.64
  -4  -8  -2    7.42    0.83
  -3  -8  -2    1.62    0.52
   3   8   2    2.01    0.43
   3   8   2    1.07    0.80
   3   8   2    1.38    0.37
  -3  -8  -2    1.37    0.50
  -3  -8  -2    1.60    0.72
   2   8   2   13.76    1.36
  -2  -8  -2   12.46    0.90
  -2  -8  -2   11.35    0.93
   1   8   2   77.87    3.21
  -1  -8  -2   69.89    2.74
  -1  -8  -2   75.35    2.78
   0   8   2  145.86    5.25
   0  -8  -2  142.46    4.95
   0  -8  -2  132.94    4.93
   1  -8  -2   -0.45    0.36
   1  -8  -2   -0.34    0.37
  -1   8   2    0.07    0.40
  -3   8   2    8.22    0.85
   3  -8  -2    8.80    0.82
   3  -8  -2    8.76    0.95
   3  -8  -2    8.70    0.93
  -3   8   2    8.62    0.83
   3  -8  -2    7.56    0.84
  -3   8   2    9.83    0.96
  -4   8   2   52.29    2.44
  -4   8   2   52.69    2.47
   4  -8  -2   55.42    2.57
   4  -8  -2   48.09    2.60
   4  -8  -2   55.81    2.67
   4  -8  -2   61.11    2.56
   5  -8  -2   -2.26    0.70
  -5   8   2   -1.48    0.73
   5  -8  -2   -2.29    0.62
   5  -8  -2   -1.09    0.76
  -5   8   2   -1.21    0.65
  -6   8   2   74.84    3.49
   6  -8  -2   72.08    3.64
   6  -8  -2   75.66    3.82
   7  -8  -2    8.26    1.49
   7  -8  -2    7.45    1.41
  -7   8   2    6.40    1.20
   8  -8  -2  126.27    5.78
  -8   8   2  123.81    5.33
   8  -8  -2  127.40    5.70
   9  -8  -2    8.70    1.66
  -9   8   2    6.22    1.33
   9  -8  -2   11.28    1.78
 -10   8   2    3.86    1.27
  10  -8  -2    5.39    1.73
  10  -8  -2    6.23    1.64
  11  -8  -2    0.08    1.37
 -12  -7  -2    0.22    1.37
 -12  -7  -2    0.09    1.27
 -11  -7  -2    2.51    1.38
 -11  -7  -2    3.24    1.48
  11   7   2    0.30    1.09
  10   7   2    7.54    1.39
 -10  -7  -2   11.60    1.66
 -10  -7  -2    7.83    1.52
  -9  -7  -2    1.47    1.01
  -9  -7  -2    1.12    1.03
   9   7   2    3.09    1.09
  -8  -7  -2   37.71    2.31
  -8  -7  -2   30.51    2.29
   8   7   2   34.68    2.28
   7   7   2    2.34    0.80
  -7  -7  -2    0.93    0.99
  -7  -7  -2    1.52    0.77
  -7  -7  -2    1.86    0.86
  -7  -7  -2    2.36    0.87
   6   7   2    2.20    0.65
  -6  -7  -2    1.61    0.73
   6   7   2    0.96    0.62
  -6  -7  -2    1.44    0.74
  -6  -7  -2    2.10    0.66
  -6  -7  -2    2.71    0.79
  -6  -7  -2    1.44    0.96
   5   7   2    0.59    0.48
  -5  -7  -2    0.65    0.53
  -5  -7  -2    0.18    0.78
  -5  -7  -2    0.47    0.50
  -5  -7  -2    1.12    0.48
  -5  -7  -2    2.12    0.65
   5   7   2    0.31    0.40
   4   7   2    0.24    0.38
  -4  -7  -2    0.10    0.46
  -4  -7  -2    1.15    0.70
   4   7   2   -0.47    0.62
  -4  -7  -2    0.42    0.36
  -4  -7  -2    0.46    0.33
   4   7   2    0.80    0.44
  -4  -7  -2   -0.79    0.40
   3   7   2    0.80    0.29
   3   7   2   -0.52    0.58
  -3  -7  -2    0.89    0.69
  -3  -7  -2    0.49    0.41
  -3  -7  -2    0.40    0.39
   3   7   2    0.61    0.31
   2   7   2  218.02    7.77
  -2  -7  -2  216.64    7.29
  -2  -7  -2  209.54    7.75
  -2  -7  -2  200.91    7.26
   1   7   2   23.32    1.42
   0   7   2   26.44    1.44
   1  -7  -2   42.92    1.81
  -1   7   2   44.17    1.90
   1  -7  -2   44.63    1.83
   2  -7  -2   22.01    1.10
   2  -7  -2   23.61    1.08
   2  -7  -2   16.45    1.17
   2  -7  -2   20.57    1.22
  -2   7   2   19.25    1.05
  -2   7   2   19.18    1.05
  -2   7   2   21.70    1.22
  -2   7   2   21.45    1.06
   3  -7  -2    2.29    0.64
   3  -7  -2    1.02    0.61
   3  -7  -2    1.91    0.62
  -3   7   2    1.87    0.55
  -3   7   2    2.46    0.57
  -3   7   2    1.92    0.61
   3  -7  -2    2.26    0.60
  -4   7   2   13.66    1.20
   4  -7  -2   11.95    1.22
   4  -7  -2   15.86    1.36
   4  -7  -2   18.03    1.27
  -4   7   2   14.70    1.16
  -4   7   2   17.19    1.41
   4  -7  -2   15.02    1.33
  -5   7   2    3.71    0.79
   5  -7  -2    2.92    0.75
  -5   7   2    3.46    0.91
   5  -7  -2    3.39    0.90
   5  -7  -2    1.40    0.91
  -5   7   2    3.04    0.85
   5  -7  -2    3.02    0.85
  -6   7   2   80.11    3.04
  -6   7   2   73.03    3.40
   6  -7  -2   76.91    3.64
   6  -7  -2   71.66    3.65
  -6   7   2   76.50    3.47
  -6   7   2   72.13    3.66
   6  -7  -2   74.86    3.71
   7  -7  -2  204.12    8.29
   7  -7  -2  204.30    8.23
  -7   7   2  206.66    7.82
  -7   7   2  220.01    7.60
  -8   7   2   58.82    3.17
   8  -7  -2   61.63    3.56
   8  -7  -2   61.85    3.53
   9  -7  -2   49.38    3.34
   9  -7  -2   52.41    3.40
  -9   7   2   51.20    2.97
  10  -7  -2    0.71    1.32
  10  -7  -2    0.03    1.14
  11  -7  -2   -0.40    1.54
  12  -7  -2    0.53    1.64
 -12  -6  -2    0.30    1.33
 -12  -6  -2    1.27    1.46
  11   6   2    5.50    1.36
 -11  -6  -2    6.82    1.57
 -11  -6  -2    5.08    1.59
 -10  -6  -2   -0.40    0.97
 -10  -6  -2    0.29    1.05
  10   6   2   -1.04    0.86
   9   6   2    3.73    1.07
  -9  -6  -2    5.43    1.24
  -9  -6  -2    3.37    1.11
   8   6   2    2.03    0.88
  -8  -6  -2    1.94    0.98
  -8  -6  -2    1.36    0.91
  -8  -6  -2    2.67    1.31
  -7  -6  -2   16.03    1.50
  -7  -6  -2   15.95    1.52
  -7  -6  -2   13.46    1.36
   7   6   2   14.22    1.36
   7   6   2   13.14    1.28
  -7  -6  -2   12.31    1.66
  -6  -6  -2   10.59    1.14
   6   6   2    9.32    0.94
  -6  -6  -2    9.80    1.38
  -6  -6  -2   10.23    1.00
   6   6   2    9.26    1.00
  -6  -6  -2   10.68    1.11
  -6  -6  -2   10.38    1.09
   5   6   2   20.06    1.18
  -5  -6  -2   19.06    1.25
  -5  -6  -2   18.13    1.33
  -5  -6  -2   19.50    1.30
   5   6   2   19.98    1.64
  -5  -6  -2   18.85    1.62
   5   6   2   20.12    1.24
   5   6   2   20.39    1.44
  -5  -6  -2   20.01    1.38
  -4  -6  -2   42.06    1.85
  -4  -6  -2   42.56    1.98
   4   6   2   43.71    1.76
   4   6   2   41.05    1.80
  -4  -6  -2   44.66    2.01
   4   6   2   42.53    2.31
   4   6   2   42.56    1.98
  -4  -6  -2   41.07    2.28
  -4  -6  -2   43.50    1.83
  -3  -6  -2   18.13    1.05
  -3  -6  -2   14.80    1.01
   3   6   2   19.62    1.37
  -3  -6  -2   15.84    1.32
   3   6   2   16.05    0.79
   3   6   2   16.90    1.05
   3   6   2   15.38    0.84
  -3  -6  -2   16.99    1.02
  -2  -6  -2  337.32   12.16
  -2  -6  -2  351.80   11.75
  -2  -6  -2  344.47   11.75
   2   6   2  355.36   12.19
   1   6   2  318.85   11.12
   0   6   2  614.02   20.77
   1  -6  -2   69.79    2.56
  -1   6   2   66.96    2.65
  -1   6   2   71.50    2.57
   1  -6  -2   66.02    2.55
  -2   6   2  238.43    7.98
  -2   6   2  247.80    8.32
   2  -6  -2  234.18    8.33
   2  -6  -2  252.34    8.35
  -2   6   2  233.75    7.97
   2  -6  -2  240.06    8.24
   2  -6  -2  235.24    8.24
  -3   6   2  148.44    5.23
  -3   6   2  148.79    5.23
   3  -6  -2  147.03    5.40
   3  -6  -2  158.88    5.52
  -3   6   2  144.66    5.46
   3  -6  -2  142.16    5.41
   3  -6  -2  152.27    5.52
  -4   6   2    0.63    0.53
   4  -6  -2    0.37    0.62
  -4   6   2    1.45    0.62
   4  -6  -2    0.24    0.56
   4  -6  -2   -0.13    0.48
  -4   6   2    1.84    0.56
   4  -6  -2    1.64    0.60
   5  -6  -2    1.85    0.90
  -5   6   2    3.64    0.78
   5  -6  -2    2.98    0.84
   5  -6  -2    1.54    0.79
  -5   6   2    1.98    0.80
   5  -6  -2    1.32    0.78
  -5   6   2    3.14    0.87
  -6   6   2   39.60    2.14
   6  -6  -2   36.95    2.29
   6  -6  -2   36.85    2.33
  -6   6   2   41.01    2.26
   6  -6  -2   34.58    2.35
  -6   6   2   39.83    2.44
   7  -6  -2    5.45    1.28
  -7   6   2    6.10    1.25
   7  -6  -2    6.02    1.23
  -7   6   2    3.43    0.87
  -7   6   2    4.97    1.02
   8  -6  -2   26.03    2.26
   8  -6  -2   25.50    2.32
  -8   6   2   27.87    2.33
  -8   6   2   24.52    1.91
  -8   6   2   22.94    1.74
   9  -6  -2    0.69    1.11
  -9   6   2    1.53    0.89
   9  -6  -2    1.52    1.07
  10  -6  -2    0.21    1.24
  10  -6  -2   -1.78    1.00
  11  -6  -2    5.23    1.69
  12  -6  -2   -0.28    1.61
 -12  -5  -2    7.83    1.74
 -12  -5  -2    3.54    1.55
  11   5   2    0.47    1.12
 -11  -5  -2    1.41    1.26
 -11  -5  -2   -0.44    1.13
 -10  -5  -2    7.20    1.46
  10   5   2    5.93    1.30
 -10  -5  -2    6.23    1.45
  -9  -5  -2   15.56    1.76
  -9  -5  -2   17.45    1.78
   9   5   2   17.37    1.66
  -8  -5  -2   10.77    1.61
   8   5   2    9.82    1.27
  -8  -5  -2    9.50    1.36
  -8  -5  -2    9.08    1.34
   7   5   2    1.21    0.75
  -7  -5  -2    0.53    0.83
   7   5   2    0.95    0.84
  -7  -5  -2    1.06    0.78
   7   5   2    1.97    0.72
  -7  -5  -2    1.93    1.01
  -7  -5  -2    0.85    0.81
   6   5   2    8.11    1.01
  -6  -5  -2    6.23    1.11
   6   5   2    8.70    0.87
   6   5   2    5.85    0.87
  -6  -5  -2    6.24    0.95
  -6  -5  -2    7.46    0.96
  -6  -5  -2    7.30    0.92
  -6  -5  -2    8.40    1.01
  -5  -5  -2    0.91    0.52
  -5  -5  -2    1.79    0.60
   5   5   2    0.57    0.41
  -5  -5  -2    0.56    0.54
  -5  -5  -2    0.72    0.50
  -5  -5  -2    1.52    0.71
   5   5   2    1.87    0.53
   5   5   2    2.24    0.61
   5   5   2    1.09    0.65
  -4  -5  -2  116.13    4.77
   4   5   2  116.05    4.19
   4   5   2  120.93    4.77
  -4  -5  -2  111.83    4.39
   4   5   2  118.32    4.14
  -4  -5  -2  122.31    4.33
  -4  -5  -2  121.16    4.45
   4   5   2  118.18    4.44
  -4  -5  -2  116.05    4.33
  -3  -5  -2   75.08    2.86
   3   5   2   74.08    3.20
   3   5   2   72.08    2.60
   3   5   2   77.36    2.87
  -3  -5  -2   71.74    2.83
  -3  -5  -2   74.45    2.76
  -3  -5  -2   76.92    2.76
   3   5   2   75.18    2.65
  -3  -5  -2   74.27    3.22
   2   5   2   58.61    1.99
  -2  -5  -2   47.09    2.32
   2   5   2   48.30    2.30
   1   5   2    0.67    0.46
   0   5   2   41.93    1.81
  -1   5   2 2243.79   73.92
   1  -5  -2 2185.41   74.48
   1  -5  -2 2296.08   74.43
  -2   5   2  111.64    3.77
   2  -5  -2  105.89    3.93
  -2   5   2  106.81    3.98
   2  -5  -2  109.63    3.98
  -2   5   2  107.38    3.76
   2  -5  -2  107.93    3.93
   2  -5  -2  110.11    3.97
  -3   5   2   23.91    1.45
   3  -5  -2   24.15    1.36
  -3   5   2   24.93    1.26
   3  -5  -2   23.58    1.33
   3  -5  -2   24.50    1.35
  -3   5   2   25.06    1.24
   3  -5  -2   23.70    1.36
   4  -5  -2    2.44    0.64
   4  -5  -2    1.89    0.57
   4  -5  -2    2.48    0.61
  -4   5   2    1.78    0.51
  -4   5   2    3.41    0.72
   4  -5  -2    1.53    0.58
  -4   5   2    1.80    0.54
   5  -5  -2    2.32    0.75
   5  -5  -2    2.85    0.71
  -5   5   2    1.99    0.71
  -5   5   2    1.81    0.56
   5  -5  -2    2.33    0.67
  -5   5   2    2.52    0.65
   5  -5  -2    2.04    0.66
   6  -5  -2   89.72    4.25
   6  -5  -2  100.05    4.40
  -6   5   2  101.63    4.08
  -6   5   2  103.33    4.16
   6  -5  -2  102.52    4.31
  -6   5   2   99.77    4.38
   6  -5  -2  102.48    4.40
  -6   5   2  105.98    4.22
  -7   5   2   85.89    3.63
   7  -5  -2   82.22    3.97
  -7   5   2   87.68    4.05
   7  -5  -2   81.48    4.00
  -7   5   2   84.97    3.70
   8  -5  -2   15.86    1.78
  -8   5   2   17.41    1.61
  -8   5   2   18.64    1.55
   8  -5  -2   16.75    1.88
  -8   5   2   20.66    2.06
  -9   5   2    1.64    1.10
   9  -5  -2    2.14    1.27
  -9   5   2    0.80    0.79
   9  -5  -2    1.75    1.10
  10  -5  -2   -0.36    1.16
  11  -5  -2    1.01    1.53
  12  -5  -2    1.08    1.76
 -13  -4  -2    1.45    1.51
 -12  -4  -2    1.16    1.36
  11   4   2    0.41    1.06
 -11  -4  -2    1.28    1.23
 -11  -4  -2    0.76    1.08
 -10  -4  -2    3.46    1.21
  10   4   2    2.26    1.06
 -10  -4  -2    1.67    1.14
   9   4   2    1.50    0.87
  -9  -4  -2    2.38    1.10
  -9  -4  -2    2.58    1.07
  -9  -4  -2    0.48    0.95
  -8  -4  -2   69.23    3.47
   8   4   2   70.10    3.54
  -8  -4  -2   71.62    3.73
  -8  -4  -2   66.92    3.42
   8   4   2   64.73    3.24
  -7  -4  -2   60.81    3.02
   7   4   2   65.39    2.86
  -7  -4  -2   58.43    3.26
  -7  -4  -2   61.66    3.06
  -7  -4  -2   60.52    2.98
   7   4   2   61.20    3.09
   7   4   2   57.89    2.85
  -7  -4  -2   62.39    3.07
  -6  -4  -2   17.84    1.45
  -6  -4  -2   16.33    1.35
   6   4   2   15.86    1.42
   6   4   2   16.30    1.24
  -6  -4  -2   17.42    1.41
  -6  -4  -2   17.08    1.34
   6   4   2   15.88    1.20
  -6  -4  -2   17.34    1.56
   6   4   2   18.17    1.53
  -5  -4  -2   13.27    1.19
  -5  -4  -2   11.06    1.07
  -5  -4  -2   11.60    1.12
  -5  -4  -2   12.54    1.28
   5   4   2   11.18    0.97
   5   4   2   11.99    1.20
   5   4   2   11.86    1.16
   5   4   2   10.42    0.92
  -4  -4  -2  298.66   10.38
  -4  -4  -2  311.41   10.40
   4   4   2  295.51    9.91
   4   4   2  297.38   10.68
  -4  -4  -2  289.72   10.27
   4   4   2  300.47   10.35
  -4  -4  -2  293.91   10.69
  -4  -4  -2  308.25   10.29
   4   4   2  296.14    9.96
  -3  -4  -2  152.55    5.78
   3   4   2  155.04    5.21
  -3  -4  -2  162.10    5.43
   3   4   2  159.61    5.48
  -3  -4  -2  151.02    5.41
   3   4   2  157.88    5.80
  -3  -4  -2  157.25    5.47
   3   4   2  150.49    5.17
  -3  -4  -2  149.74    5.46
   2   4   2   84.85    2.98
  -2  -4  -2   81.72    3.30
  -2  -4  -2   80.70    2.91
   2   4   2   82.12    3.29
  -2  -4  -2   86.86    2.97
  -2  -4  -2   81.05    2.95
   1   4   2   31.78    1.50
   1  -4  -2   44.48    1.67
   1  -4  -2   45.90    1.68
   1  -4  -2   42.04    1.66
   1  -4  -2   42.39    1.67
  -1   4   2   45.72    1.72
  -2   4   2  100.90    3.54
   2  -4  -2   95.43    3.70
  -2   4   2  106.29    3.75
   2  -4  -2  103.99    3.72
   2  -4  -2  104.50    3.72
   2  -4  -2  100.85    3.71
  -2   4   2   97.80    3.51
   3  -4  -2  333.00   11.68
   3  -4  -2  350.66   11.73
  -3   4   2  341.89   11.28
  -3   4   2  347.04   11.72
   3  -4  -2  335.10   11.72
  -3   4   2  345.49   11.62
  -3   4   2  328.71   11.28
  -4   4   2  493.57   16.65
   4  -4  -2  494.05   16.67
   4  -4  -2  484.50   16.60
  -4   4   2  481.23   16.07
   4  -4  -2  478.68   16.67
   4  -4  -2  470.61   16.60
  -4   4   2  492.82   16.05
  -4   4   2  486.74   16.56
   4  -4  -2  490.06   15.94
  -5   4   2    1.04    0.67
   5  -4  -2    1.01    0.53
   5  -4  -2    0.51    0.44
   5  -4  -2    2.64    0.58
  -5   4   2    0.67    0.50
   5  -4  -2    1.07    0.67
  -5   4   2    1.86    0.59
   5  -4  -2    0.66    0.60
  -5   4   2    2.37    0.59
   6  -4  -2    2.87    0.74
  -6   4   2    3.48    0.89
  -6   4   2    2.31    0.75
  -6   4   2    3.24    0.72
   6  -4  -2    3.82    0.92
   6  -4  -2    1.32    0.61
   6  -4  -2    2.41    0.81
  -6   4   2    4.28    0.80
   7  -4  -2    7.24    1.23
   7  -4  -2    7.16    1.07
  -7   4   2    6.40    1.00
  -7   4   2    6.62    1.18
   7  -4  -2    6.77    0.96
   7  -4  -2    7.98    1.22
  -7   4   2    7.28    1.05
  -7   4   2    6.58    1.03
  -8   4   2   14.71    1.46
   8  -4  -2   15.28    1.73
   8  -4  -2   15.11    1.66
  -8   4   2   14.07    1.41
  -8   4   2   15.69    1.71
  -9   4   2   15.77    1.60
  -9   4   2   14.04    1.88
  -9   4   2   14.60    1.58
   9  -4  -2   14.55    1.80
   9  -4  -2   14.80    1.92
 -10   4   2    1.62    1.22
 -10   4   2    2.93    1.11
  10  -4  -2    2.50    1.38
 -11   4   2   -0.71    1.23
  11  -4  -2    0.91    1.52
  12  -4  -2    0.63    1.66
  13  -4  -2    1.94    1.93
 -13  -3  -2   -1.07    1.27
 -12  -3  -2    1.88    1.36
 -11  -3  -2    0.41    1.09
  11   3   2   -0.03    0.96
 -11  -3  -2    1.52    1.27
 -10  -3  -2    1.41    1.10
 -10  -3  -2   -0.79    0.94
  10   3   2    0.01    0.88
  -9  -3  -2    3.47    1.17
   9   3   2    4.93    1.11
   9   3   2    3.97    1.22
  -9  -3  -2    2.61    1.12
  -9  -3  -2    2.59    1.13
   8   3   2   50.89    3.01
   8   3   2   51.18    2.73
  -8  -3  -2   56.00    3.07
  -8  -3  -2   50.52    2.88
  -8  -3  -2   47.09    2.92
   7   3   2   26.68    1.72
   7   3   2   25.50    1.69
  -7  -3  -2   26.34    1.96
   7   3   2   26.84    1.69
  -7  -3  -2   28.41    1.89
  -7  -3  -2   24.30    1.85
   7   3   2   24.36    1.90
  -7  -3  -2   26.98    1.87
  -7  -3  -2   28.84    1.82
   6   3   2   50.17    2.53
   6   3   2   49.73    2.27
   6   3   2   49.75    2.34
   6   3   2   50.84    2.33
  -6  -3  -2   48.41    2.45
  -6  -3  -2   45.94    2.45
  -6  -3  -2   50.22    2.48
  -6  -3  -2   45.18    2.55
  -6  -3  -2   52.20    2.46
   6   3   2   47.50    2.55
   5   3   2   51.63    2.23
   5   3   2   53.22    2.29
  -5  -3  -2   50.14    2.38
   5   3   2   51.12    2.21
  -5  -3  -2   50.23    2.37
   5   3   2   54.53    2.47
  -5  -3  -2   53.83    2.38
   5   3   2   48.63    2.52
  -5  -3  -2   53.23    2.41
  -5  -3  -2   49.22    2.59
   4   3   2   96.93    3.47
  -4  -3  -2   96.69    3.89
   4   3   2   95.65    3.87
   4   3   2   94.61    3.72
   4   3   2   92.03    3.58
  -4  -3  -2   92.51    3.65
   4   3   2   96.77    3.51
  -4  -3  -2   98.58    3.71
  -4  -3  -2   93.75    3.69
   3   3   2   57.50    2.25
   3   3   2   55.44    2.04
  -3  -3  -2   58.49    2.44
   3   3   2   54.41    2.41
  -3  -3  -2   55.26    2.19
  -3  -3  -2   53.24    2.18
  -3  -3  -2   57.96    2.23
   3   3   2   54.98    2.11
   3   3   2   56.49    2.07
  -3  -3  -2   53.39    2.20
   2   3   2  251.07    8.38
   2   3   2  247.09    8.65
  -2  -3  -2  241.70    8.64
  -2  -3  -2  257.35    8.41
  -2  -3  -2  244.21    8.40
  -2  -3  -2  242.18    8.36
  -2  -3  -2  249.96    8.35
   2   3   2  242.67    8.17
   1   3   2  420.36   14.03
   1   3   2  409.03   14.10
   0   3   2  621.92   20.24
   0   3   2  577.69   20.12
   1  -3  -2  186.74    6.58
   1  -3  -2  194.45    6.57
  -1   3   2  183.68    6.34
   1  -3  -2  190.23    6.57
  -1   3   2  195.72    6.36
  -1   3   2  194.88    6.54
   1  -3  -2  198.44    6.60
  -1   3   2  194.65    6.58
   2  -3  -2   13.94    0.85
  -2   3   2   17.18    0.96
  -2   3   2   14.15    0.83
   2  -3  -2   18.59    0.93
  -2   3   2   12.50    0.77
   2  -3  -2   14.26    0.89
   3  -3  -2   18.44    0.96
  -3   3   2   17.32    1.12
  -3   3   2   16.27    1.03
   3  -3  -2   18.22    1.13
   3  -3  -2   17.17    1.08
  -3   3   2   17.21    1.00
   3  -3  -2   17.61    1.11
  -3   3   2   17.64    0.98
   3  -3  -2   18.40    1.08
  -4   3   2  258.63    9.32
   4  -3  -2  260.91    9.40
  -4   3   2  266.67    9.43
   4  -3  -2  272.63    9.02
  -4   3   2  270.31    9.03
   4  -3  -2  257.38    9.39
   4  -3  -2  270.48    9.42
  -4   3   2  268.39    9.06
  -5   3   2   63.99    2.77
  -5   3   2   62.60    2.68
  -5   3   2   64.21    2.84
   5  -3  -2   60.74    2.86
   5  -3  -2   60.29    2.91
  -5   3   2   62.36    2.93
   5  -3  -2   62.28    2.86
   5  -3  -2   62.50    2.90
   5  -3  -2   63.05    2.66
  -6   3   2    0.24    0.54
   6  -3  -2   -0.26    0.49
  -6   3   2   -1.33    0.60
  -6   3   2   -0.79    0.50
   6  -3  -2    1.00    0.70
   6  -3  -2    0.05    0.67
   6  -3  -2    0.04    0.52
  -6   3   2   -0.31    0.55
   7  -3  -2    1.77    0.69
   7  -3  -2    2.45    0.91
  -7   3   2    0.93    0.70
  -7   3   2    1.38    0.73
  -7   3   2    1.90    0.91
   7  -3  -2    2.60    0.79
  -7   3   2    1.16    0.72
  -7   3   2    2.81    0.82
   7  -3  -2    1.41    0.92
   8  -3  -2   15.55    1.66
  -8   3   2   14.15    1.64
  -8   3   2   15.05    1.48
   8  -3  -2   15.54    1.74
  -8   3   2   15.75    1.54
   9  -3  -2   18.70    2.08
   9  -3  -2   17.02    1.88
  -9   3   2   18.64    1.73
  -9   3   2   17.71    2.00
  -9   3   2   19.06    1.81
  10  -3  -2    0.55    1.26
 -10   3   2    2.02    1.21
 -10   3   2   -0.12    0.95
 -11   3   2    6.90    1.60
  11  -3  -2    6.17    1.78
 -12   3   2   -0.63    1.38
  12  -3  -2   -1.02    1.41
  13  -3  -2    0.16    1.75
 -13  -2  -2    1.32    1.56
 -12  -2  -2    0.72    1.34
 -11  -2  -2    3.17    1.39
 -11  -2  -2    3.13    1.42
  10   2   2    9.44    1.45
 -10  -2  -2    7.66    1.53
 -10  -2  -2    7.21    1.43
  10   2   2    6.90    1.56
 -10  -2  -2    7.91    1.48
   9   2   2   75.45    4.16
   9   2   2   80.78    3.83
  -9  -2  -2   79.28    4.05
  -9  -2  -2   76.83    4.02
  -9  -2  -2   75.69    4.04
   8   2   2    6.22    1.30
   8   2   2    6.29    1.11
  -8  -2  -2    5.07    1.21
  -8  -2  -2    5.38    1.23
  -8  -2  -2    7.42    1.28
  -7  -2  -2    0.67    0.49
   7   2   2    0.92    0.60
  -7  -2  -2   -0.20    0.52
   7   2   2    1.23    0.68
   7   2   2   -0.10    0.52
  -7  -2  -2    0.69    0.75
  -7  -2  -2    0.59    0.70
  -7  -2  -2    0.32    0.71
   7   2   2   -0.21    0.70
  -6  -2  -2   57.69    2.76
   6   2   2   59.89    2.61
   6   2   2   58.87    2.69
  -6  -2  -2   57.01    2.75
  -6  -2  -2   59.78    2.72
   6   2   2   59.49    2.58
  -6  -2  -2   59.02    2.40
   6   2   2   59.76    2.83
   6   2   2   58.94    2.83
  -6  -2  -2   51.15    2.78
  -5  -2  -2  130.04    4.83
   5   2   2  128.15    4.78
  -5  -2  -2  128.27    4.85
  -5  -2  -2  116.51    4.79
  -5  -2  -2  121.88    4.79
   5   2   2  129.50    4.88
  -5  -2  -2  126.12    4.45
   5   2   2  132.11    4.60
  -5  -2  -2  121.68    4.95
   5   2   2  127.78    4.94
   5   2   2  124.88    4.60
   4   2   2  101.59    3.83
   4   2   2  100.44    3.69
  -4  -2  -2  106.36    3.91
  -4  -2  -2  100.60    4.01
   4   2   2  101.69    4.00
   4   2   2  101.78    3.91
  -4  -2  -2  103.61    3.89
  -4  -2  -2  104.00    3.90
  -4  -2  -2   96.31    3.84
   4   2   2  101.43    3.67
  -4  -2  -2   97.51    3.56
  -3  -2  -2  365.93   12.11
  -3  -2  -2  350.93   11.57
   3   2   2  358.32   12.09
   3   2   2  352.68   12.04
   3   2   2  356.03   11.65
   3   2   2  355.61   11.66
  -3  -2  -2  351.47   12.09
  -3  -2  -2  354.96   12.29
   3   2   2  361.95   12.30
  -3  -2  -2  349.46   12.05
  -2  -2  -2   31.58    1.29
  -2  -2  -2   30.88    1.44
   2   2   2   28.87    1.18
  -2  -2  -2   28.65    1.27
  -2  -2  -2   35.56    1.33
   2   2   2   30.45    1.33
   2   2   2   31.72    1.45
  -1  -2  -2  738.49   24.44
  -1  -2  -2  756.26   24.31
   1   2   2  717.90   24.73
   1   2   2  703.20   24.67
   1   2   2  724.01   24.16
   1   2   2  732.05   24.24
  -1  -2  -2  728.39   24.49
  -1  -2  -2  711.77   24.32
   0  -2  -2  253.93    8.39
   0   2   2  253.89    8.47
   0  -2  -2  232.70    8.40
   0  -2  -2  238.81    8.38
   0  -2  -2  255.77    8.43
   0   2   2  259.81    8.44
   0   2   2  240.66    8.43
   0   2   2  241.61    8.41
   0   2   2  256.69    8.39
   0   2   2  241.60    8.33
   1  -2  -2 1292.24   43.53
  -1   2   2 1331.04   42.21
   1  -2  -2 1365.82   42.23
   1  -2  -2 1290.46   43.37
   1  -2  -2 1266.32   42.24
  -1   2   2 1329.40   43.51
  -1   2   2 1282.27   42.16
   1  -2  -2 1362.84   43.52
  -1   2   2 1331.08   43.27
  -1   2   2 1269.96   43.32
  -1   2   2 1308.65   43.45
  -1   2   2 1293.11   43.34
   2  -2  -2   63.32    2.52
   2  -2  -2   56.72    2.45
  -2   2   2   58.97    2.45
  -2   2   2   75.54    2.58
   2  -2  -2   52.47    2.44
   2  -2  -2   76.16    2.58
   2  -2  -2   64.69    2.33
   2  -2  -2   71.10    2.54
  -2   2   2   60.32    2.36
  -3   2   2   85.49    3.35
   3  -2  -2   87.21    3.35
  -3   2   2   85.07    3.17
  -3   2   2   88.62    3.13
   3  -2  -2   83.92    3.13
  -3   2   2   84.77    3.28
   3  -2  -2   81.66    3.28
   3  -2  -2   82.13    3.30
  -4   2   2   43.74    2.00
  -4   2   2   39.74    2.13
   4  -2  -2   39.65    2.13
   4  -2  -2   44.54    2.13
  -4   2   2   39.75    2.03
   4  -2  -2   43.63    2.12
  -4   2   2   42.33    1.92
   4  -2  -2   42.55    2.12
  -5   2   2  576.73   20.51
   5  -2  -2  614.12   20.57
   5  -2  -2  583.94   20.50
   5  -2  -2  585.94   20.54
  -5   2   2  613.66   20.52
  -5   2   2  598.65   19.78
  -5   2   2  628.88   19.90
  -6   2   2   27.84    1.62
   6  -2  -2   28.34    1.92
  -6   2   2   29.56    1.88
   6  -2  -2   28.72    1.81
  -6   2   2   27.33    1.89
   6  -2  -2   25.35    1.71
  -6   2   2   30.01    1.75
   6  -2  -2   26.00    1.79
   7  -2  -2    1.65    0.86
  -7   2   2    2.98    0.84
  -7   2   2    2.20    0.73
  -7   2   2    2.24    0.91
   7  -2  -2    4.23    0.89
  -7   2   2    1.17    0.77
   7  -2  -2    5.01    1.01
  -8   2   2   10.00    1.18
  -8   2   2   11.64    1.44
  -8   2   2   10.35    1.34
   8  -2  -2    9.13    1.21
  -8   2   2    9.43    1.47
   8  -2  -2   10.10    1.42
   8  -2  -2   10.31    1.51
  -9   2   2    0.81    0.90
   9  -2  -2    0.47    1.10
  -9   2   2    3.28    1.24
 -10   2   2   -0.31    1.02
 -10   2   2    0.97    0.96
  10  -2  -2    1.82    1.30
  11  -2  -2   11.84    2.03
 -11   2   2   13.07    2.03
 -12   2   2   12.57    2.12
  12  -2  -2    8.79    2.19
  13  -2  -2    2.64    1.83
 -13   2   2   -0.09    1.51
 -13  -1  -2   -1.32    1.51
 -12  -1  -2    4.35    1.59
 -11  -1  -2    3.66    1.48
  11   1   2    6.60    1.73
  10   1   2   -0.81    0.98
 -10  -1  -2   -1.92    1.07
 -10  -1  -2    0.30    1.11
 -10  -1  -2   -1.33    1.20
  10   1   2   -3.34    1.20
   9   1   2    9.51    1.69
  -9  -1  -2   11.06    1.61
  -9  -1  -2    9.15    1.64
  -9  -1  -2   13.71    1.61
   9   1   2   11.05    1.46
   8   1   2   23.91    2.14
  -8  -1  -2   22.82    1.63
  -8  -1  -2   26.38    2.00
   8   1   2   23.97    1.89
  -8  -1  -2   26.15    2.12
  -8  -1  -2   21.42    2.06
   8   1   2   26.99    2.06
  -8  -1  -2   28.22    2.06
  -7  -1  -2   -0.57    0.39
  -7  -1  -2   -0.20    0.55
   7   1   2   -0.59    0.49
  -7  -1  -2   -0.41    0.69
  -7  -1  -2    0.04    0.59
  -7  -1  -2   -0.29    0.59
   7   1   2   -1.25    0.60
   7   1   2   -1.11    0.52
   7   1   2   -0.15    0.56
   6   1   2    0.76    0.51
   6   1   2    0.41    0.47
   6   1   2    0.58    0.56
  -6  -1  -2    0.54    0.59
  -6  -1  -2    0.95    0.45
  -6  -1  -2    0.75    0.56
   6   1   2    0.15    0.52
  -6  -1  -2    1.04    0.55
  -6  -1  -2   -0.33    0.53
   6   1   2    0.50    0.62
  -5  -1  -2  118.12    4.68
  -5  -1  -2  125.60    4.39
   5   1   2  120.87    4.70
   5   1   2  118.38    4.46
   5   1   2  124.13    4.48
  -5  -1  -2  118.47    4.66
  -5  -1  -2  119.26    4.69
  -5  -1  -2  124.84    4.72
  -5  -1  -2  121.33    4.74
   5   1   2  121.38    4.66
   5   1   2  122.88    4.76
   4   1   2  426.26   14.07
   4   1   2  428.69   14.55
  -4  -1  -2  416.91   14.56
   4   1   2  426.40   14.58
  -4  -1  -2  411.34   14.52
  -4  -1  -2  420.10   14.67
   4   1   2  436.15   14.06
   4   1   2  427.40   14.67
  -4  -1  -2  422.61   13.98
  -4  -1  -2  449.32   14.57
  -3  -1  -2 1318.17   45.00
   3   1   2 1351.21   43.73
  -3  -1  -2 1344.82   43.67
  -3  -1  -2 1337.76   45.42
  -3  -1  -2 1413.77   45.02
   3   1   2 1356.49   45.04
   3   1   2 1384.54   43.72
  -3  -1  -2 1414.24   43.68
  -3  -1  -2 1339.52   45.16
   3   1   2 1333.59   45.13
   3   1   2 1383.80   45.11
   3   1   2 1345.20   45.42
   2   1   2  427.20   13.58
   2   1   2  409.05   13.59
  -2  -1  -2  339.21   13.56
   2   1   2  403.38   13.15
  -2  -1  -2  403.33   13.62
   2   1   2  408.86   13.16
   2   1   2  396.04   13.59
   2   1   2  412.93   13.74
  -2  -1  -2  416.25   13.59
   2   1   2  409.26   13.61
  -2  -1  -2  412.30   13.14
  -2  -1  -2  410.00   13.12
  -2  -1  -2  406.64   13.59
   1   1   2    2.88    0.30
   1   1   2    2.88    0.26
   1   1   2    3.00    0.24
   1   1   2    3.30    0.29
  -1  -1  -2    3.35    0.31
  -1  -1  -2    2.97    0.24
   1   1   2    2.65    0.26
  -1  -1  -2    2.95    0.25
   1   1   2    2.74    0.26
  -1  -1  -2    2.03    0.26
  -1  -1  -2    2.47    0.26
  -1  -1  -2    2.45    0.25
   0   1   2  164.96    5.46
   0   1   2  169.04    5.65
   0  -1  -2  153.35    5.63
   0   1   2  168.56    5.64
   0  -1  -2  145.22    5.62
   0   1   2  168.42    5.66
   0   1   2  168.74    5.45
   0   1   2  166.54    5.62
   0  -1  -2  170.18    5.44
   0  -1  -2  168.62    5.66
   0  -1  -2  161.29    5.63
   0  -1  -2  166.20    5.45
   1  -1  -2   32.40    1.34
  -1   1   2   32.58    1.33
  -1   1   2   30.68    1.27
   1  -1  -2   31.88    1.33
  -1   1   2   31.99    1.27
  -1   1   2   31.27    1.37
  -1   1   2   32.40    1.25
  -1   1   2   30.90    1.32
   1  -1  -2   32.62    1.24
  -1   1   2   31.48    1.32
   1  -1  -2   32.68    1.37
  -1   1   2   33.36    1.33
   2  -1  -2 1422.40   48.60
  -2   1   2 1472.31   48.64
   2  -1  -2 1525.62   48.49
  -2   1   2 1466.32   47.11
   2  -1  -2 1479.37   47.05
   2  -1  -2 1419.02   48.63
   2  -1  -2 1440.84   48.62
  -2   1   2 1469.75   47.09
   2  -1  -2 1438.67   48.49
  -2   1   2 1450.62   48.51
  -2   1   2 1514.06   48.44
  -2   1   2 1498.32   48.62
   3  -1  -2  123.02    4.46
   3  -1  -2  115.22    4.42
  -3   1   2  113.98    4.44
   3  -1  -2  117.10    4.26
   3  -1  -2  109.12    4.39
   3  -1  -2  121.95    4.43
  -3   1   2  117.29    4.41
   3  -1  -2  127.68    4.22
  -3   1   2  115.57    4.24
   3  -1  -2  121.85    4.48
  -3   1   2  119.01    4.20
  -3   1   2  122.02    4.42
   4  -1  -2 1239.02   40.24
  -4   1   2 1188.70   38.87
   4  -1  -2 1177.88   38.94
  -4   1   2 1249.07   40.25
   4  -1  -2 1266.88   38.90
  -4   1   2 1202.76   40.23
  -4   1   2 1177.20   40.16
   4  -1  -2 1163.09   40.10
   4  -1  -2 1147.45   40.19
  -4   1   2 1227.77   38.94
  -5   1   2   10.19    0.99
  -5   1   2    9.26    1.01
   5  -1  -2    8.66    0.93
  -5   1   2    8.73    1.07
   5  -1  -2    9.55    1.03
  -5   1   2    8.85    0.87
   5  -1  -2    8.10    0.93
   5  -1  -2    8.65    1.08
  -6   1   2   26.39    1.75
  -6   1   2   29.86    1.64
   6  -1  -2   27.42    1.90
  -6   1   2   27.92    1.90
   6  -1  -2   28.45    1.81
   6  -1  -2   29.65    1.77
  -7   1   2   17.12    1.40
   7  -1  -2   20.04    1.75
   7  -1  -2   18.29    1.66
  -7   1   2   18.23    1.56
   7  -1  -2   18.88    1.61
  -7   1   2   20.60    1.76
  -7   1   2   15.93    1.60
  -8   1   2    0.44    0.66
  -8   1   2    0.10    0.82
  -8   1   2    0.71    0.91
   8  -1  -2    0.81    0.82
   8  -1  -2   -0.31    0.67
   8  -1  -2   -0.82    0.80
  -8   1   2   -0.14    0.77
  -9   1   2   10.55    1.51
   9  -1  -2   11.06    1.63
  -9   1   2    8.38    1.49
 -10   1   2    1.21    0.90
 -10   1   2   -0.27    1.05
  10  -1  -2    0.61    1.14
 -11   1   2    5.11    1.54
  11  -1  -2    4.36    1.56
 -12   1   2   -0.63    1.35
  12  -1  -2    2.28    1.66
 -13   1   2    0.15    1.53
 -13   0  -2   -0.64    1.43
  12   0   2    3.95    1.80
 -12   0  -2    5.72    1.79
 -11   0  -2    2.14    1.11
 -11   0  -2    4.00    1.42
  11   0   2    2.01    1.44
 -10   0  -2   33.61    2.55
  10   0   2   35.69    2.93
 -10   0  -2   32.07    2.69
 -10   0  -2   35.83    2.77
  -9   0  -2   44.69    2.91
  -9   0  -2   46.83    2.89
   9   0   2   46.34    2.72
  -9   0  -2   42.93    2.69
   9   0   2   49.93    3.14
  -8   0  -2    4.76    1.03
   8   0   2    3.72    0.98
   8   0   2    4.99    1.17
  -8   0  -2    3.69    1.09
  -8   0  -2    1.27    0.55
  -8   0  -2    4.86    1.09
   8   0   2    3.30    0.90
   7   0   2    2.89    0.67
  -7   0  -2    2.51    0.64
   7   0   2    1.42    0.70
  -7   0  -2    2.16    0.60
  -7   0  -2    3.66    0.84
   7   0   2    2.04    0.67
  -7   0  -2    2.04    0.73
  -7   0  -2    2.37    0.82
   7   0   2    1.67    0.82
  -6   0  -2  109.04    4.35
  -6   0  -2  114.00    4.43
   6   0   2  108.29    4.20
  -6   0  -2  105.30    4.41
  -6   0  -2  102.90    4.08
   6   0   2  114.18    4.22
   6   0   2  106.79    4.30
   6   0   2  108.14    4.50
   6   0   2  104.52    4.37
  -6   0  -2  106.17    4.40
  -5   0  -2  123.59    4.61
  -5   0  -2  116.35    4.53
  -5   0  -2  116.64    4.59
  -5   0  -2  116.57    4.30
   5   0   2  114.91    4.56
   5   0   2  114.97    4.49
  -5   0  -2  115.89    4.57
   5   0   2  118.30    4.36
   5   0   2  121.45    4.38
   5   0   2  116.84    4.64
  -4   0  -2   31.63    1.62
  -4   0  -2   30.19    1.45
   4   0   2   30.72    1.53
   4   0   2   32.43    1.52
   4   0   2   31.22    1.49
  -4   0  -2   32.01    1.65
  -4   0  -2   35.71    1.53
  -4   0  -2   32.55    1.64
   4   0   2   31.09    1.59
  -4   0  -2   31.47    1.61
   4   0   2   31.32    1.69
   4   0   2   32.52    1.57
  -4   0  -2   31.74    1.56
  -3   0  -2 2859.95   90.35
   3   0   2 2851.67   90.31
  -3   0  -2 2669.19   90.65
   3   0   2 2772.29   90.62
   3   0   2 2734.63   90.41
  -3   0  -2 2523.01   87.77
   3   0   2 2761.69   91.15
  -3   0  -2 2853.15   87.80
  -3   0  -2 2789.17   90.66
  -3   0  -2 2655.19   90.35
   3   0   2 2822.96   87.81
   3   0   2 2668.92   90.66
  -3   0  -2 2710.18   91.16
   3   0   2 2738.03   87.84
   2   0   2 7271.50  248.50
  -2   0  -2 7201.37  248.96
   2   0   2 7278.11  241.03
  -2   0  -2 7728.48  247.35
  -2   0  -2 7713.88  240.98
  -2   0  -2 7564.97  248.15
   2   0   2 7367.09  248.16
   2   0   2 7590.90  241.04
  -2   0  -2 7676.07  248.81
   2   0   2 7651.70  247.91
   2   0   2 7598.63  248.79
   1   0   2 1426.06   48.74
   1   0   2 1472.36   48.62
  -1   0  -2 1503.16   47.19
  -1   0  -2 1511.47   48.56
   1   0   2 1525.13   48.74
   1   0   2 1500.79   47.22
  -1   0  -2 1280.09   47.16
  -1   0  -2 1505.94   48.78
  -1   0  -2 1486.82   48.73
   1   0   2 1470.10   47.23
  -1   0  -2 1441.41   48.57
   1   0   2 1513.35   48.53
   0   0  -2 1220.08   41.63
   0   0   2 1256.37   41.53
   0   0  -2 1271.49   41.62
   0   0   2 1228.38   41.63
   0   0  -2 1218.63   41.48
   0   0  -2 1229.35   40.34
   0   0  -2 1332.07   41.50
   0   0   2 1224.57   40.31
   0   0   2 1265.35   41.61
   0   0   2 1276.47   40.33
   0   0   2 1276.34   41.43
   0   0  -2 1246.94   40.28
   1   0  -2  246.38    7.85
  -1   0   2  251.03    8.13
   1   0  -2  234.59    8.13
  -1   0   2  228.26    8.14
   1   0  -2  238.20    8.13
  -1   0   2  226.11    8.14
  -1   0   2  242.17    7.85
   1   0  -2  233.04    7.88
   1   0  -2  237.47    8.15
   1   0  -2  233.53    8.13
  -1   0   2  235.37    7.87
  -1   0   2  244.56    8.15
  -2   0   2  405.83   14.19
   2   0  -2  401.17   14.18
   2   0  -2  424.32   14.19
  -2   0   2  434.81   14.23
   2   0  -2  418.46   14.17
  -2   0   2  420.73   13.69
  -2   0   2  414.17   14.21
  -2   0   2  422.72   13.74
  -2   0   2  435.91   14.16
  -2   0   2  413.84   14.20
   2   0  -2  407.31   13.74
  -2   0   2  406.17   14.19
   2   0  -2  430.43   13.70
   2   0  -2  431.49   14.21
   3   0  -2  119.90    4.59
  -3   0   2  126.46    4.44
  -3   0   2  120.77    4.36
  -3   0   2  122.10    4.60
  -3   0   2  128.95    4.63
   3   0  -2  124.67    4.46
  -3   0   2  127.98    4.63
  -3   0   2  118.66    4.62
   3   0  -2  122.62    4.63
   3   0  -2  125.83    4.39
   3   0  -2  121.94    4.58
   4   0  -2  419.73   14.55
  -4   0   2  456.40   15.11
   4   0  -2  444.90   15.06
  -4   0   2  444.62   15.10
  -4   0   2  438.97   14.54
   4   0  -2  461.59   14.51
   4   0  -2  430.64   15.03
   4   0  -2  433.71   15.04
  -4   0   2  423.61   14.44
  -4   0   2  421.42   15.04
   5   0  -2   42.71    2.26
  -5   0   2   42.44    2.36
   5   0  -2   41.34    2.33
  -5   0   2   50.19    2.32
  -5   0   2   43.38    2.06
  -5   0   2   41.40    2.23
   5   0  -2   45.42    2.24
   5   0  -2   47.68    2.15
   6   0  -2   17.84    1.51
   6   0  -2   14.65    1.49
   6   0  -2   18.34    1.34
  -6   0   2   18.25    1.30
  -6   0   2   19.00    1.50
  -6   0   2   20.78    1.49
  -6   0   2   17.36    1.58
   6   0  -2   17.05    1.44
   7   0  -2    4.32    1.02
  -7   0   2    6.35    0.92
  -7   0   2    6.47    1.14
  -7   0   2    6.82    1.24
   7   0  -2    5.71    1.04
  -7   0   2    5.92    1.07
   7   0  -2    6.94    1.22
   8   0  -2    2.14    0.93
   8   0  -2    2.75    1.18
  -8   0   2    2.01    1.06
  -8   0   2    0.41    1.00
  -8   0   2    3.20    1.06
  -9   0   2    1.02    1.08
   9   0  -2    0.10    1.01
  -9   0   2    1.93    1.05
  -9   0   2    0.09    0.97
 -10   0   2   -0.15    1.05
  10   0  -2    2.06    1.20
 -11   0   2    4.29    1.50
  11   0  -2    2.54    1.49
 -12   0   2   18.50    2.43
 -13   0   2    0.38    1.59
  13  -1   2    3.47    1.94
 -13   1  -2    2.19    1.68
  12  -1   2    2.25    1.60
 -12   1  -2   -0.56    1.20
  11  -1   2    6.66    1.73
 -11   1  -2    3.47    1.45
 -11   1  -2    2.43    1.18
  10  -1   2    8.03    1.79
 -10   1  -2    9.65    1.54
 -10   1  -2    8.99    1.66
   9  -1   2    2.31    1.19
  -9   1  -2    2.61    1.03
  -9   1  -2    1.44    1.05
  -9   1  -2    2.44    0.97
   9  -1   2    3.52    0.96
  -8   1  -2    2.84    0.93
  -8   1  -2    2.02    1.10
   8  -1   2    1.23    1.10
  -8   1  -2    1.92    0.88
   8  -1   2   -0.11    0.83
   8  -1   2    1.61    0.98
  -8   1  -2    1.31    0.98
   7  -1   2   56.53    2.68
   7  -1   2   55.53    2.83
  -7   1  -2   54.56    2.81
   7  -1   2   56.13    3.02
  -7   1  -2   57.82    2.62
  -7   1  -2   54.93    2.68
  -7   1  -2   54.55    2.89
  -6   1  -2   24.05    1.46
  -6   1  -2   23.63    1.62
   6  -1   2   25.28    1.46
  -6   1  -2   25.17    1.70
   6  -1   2   24.47    1.65
  -6   1  -2   28.00    1.54
   6  -1   2   25.68    1.78
   6  -1   2   24.49    1.52
   5  -1   2   13.27    1.03
   5  -1   2   11.96    1.20
  -5   1  -2   13.53    0.99
  -5   1  -2   13.14    1.12
  -5   1  -2   13.18    1.06
   5  -1   2   12.62    1.04
   5  -1   2   11.70    1.05
  -5   1  -2   12.05    1.19
  -5   1  -2   11.07    1.04
  -5   1  -2   12.43    1.02
   5  -1   2   13.78    0.96
   5  -1   2   13.06    1.15
   4  -1   2  343.58   11.74
   4  -1   2  347.57   11.33
  -4   1  -2  342.35   11.75
   4  -1   2  329.01   11.77
  -4   1  -2  336.46   11.32
  -4   1  -2  324.60   11.70
   4  -1   2  340.47   11.64
   4  -1   2  328.68   11.75
  -4   1  -2  358.17   11.35
  -4   1  -2  347.15   11.77
   4  -1   2  332.63   11.31
  -4   1  -2  337.12   11.65
   3  -1   2    8.77    0.69
   3  -1   2   10.73    0.84
  -3   1  -2    9.03    0.79
  -3   1  -2   10.88    0.82
  -3   1  -2   10.25    0.75
   3  -1   2    8.83    0.71
   3  -1   2   10.39    0.78
  -3   1  -2    9.98    0.73
   3  -1   2   10.92    0.92
   3  -1   2   10.92    0.82
  -3   1  -2    9.94    0.87
   3  -1   2   11.21    0.85
  -2   1  -2 9808.35  318.11
   2  -1   2 9853.75  308.43
  -2   1  -2 9559.34  308.60
   2  -1   2 9999.36  317.23
   2  -1   2 9225.80  318.30
  -2   1  -2 9597.82  308.29
   2  -1   2 9317.28  317.12
   2  -1   2 9649.08  318.42
  -2   1  -2 9556.79  317.06
  -2   1  -2 9816.26  316.66
  -2   1  -2 9446.83  318.27
   1  -1   2 4736.05  152.91
  -1   1  -2 4705.74  154.13
   1  -1   2 4747.37  149.33
  -1   1  -2 4620.54  153.50
  -1   1  -2 4538.45  149.39
   1  -1   2 4508.71  153.50
   1  -1   2 4473.92  153.39
  -1   1  -2 4913.42  152.63
  -1   1  -2 4674.88  149.10
  -1   1  -2 4522.02  153.80
   0  -1   2  353.40   11.60
   0  -1   2  344.00   11.64
   0   1  -2  333.48   11.62
   0   1  -2  357.99   11.65
   0   1  -2  333.67   11.59
   0   1  -2  351.13   11.63
   0   1  -2  336.61   11.26
   0   1  -2  336.74   11.21
   0  -1   2  352.58   11.26
   0  -1   2  338.97   11.64
   1   1  -2   86.00    3.15
   1   1  -2   80.36    3.04
  -1  -1   2   80.90    3.18
   1   1  -2   83.13    3.04
  -1  -1   2   87.78    3.04
   1   1  -2   85.21    3.16
  -1  -1   2   88.69    3.16
  -1  -1   2   82.14    3.15
   1   1  -2   84.11    2.99
   1   1  -2   84.72    3.19
   1   1  -2   86.10    3.15
   2   1  -2   76.53    3.09
   2   1  -2   72.46    3.05
  -2  -1   2   80.64    3.10
   2   1  -2   79.91    2.93
  -2  -1   2   86.70    2.99
  -2  -1   2   83.68    3.17
   2   1  -2   78.12    2.99
   2   1  -2   85.84    3.10
  -2  -1   2   83.37    3.18
  -2  -1   2   78.90    3.11
   3   1  -2  175.55    6.19
   3   1  -2  175.61    6.37
  -3  -1   2  172.30    6.39
  -3  -1   2  187.79    6.46
  -3  -1   2  172.73    6.42
  -3  -1   2  187.02    6.40
  -3  -1   2  170.93    6.39
   3   1  -2  170.86    6.37
   3   1  -2  181.51    6.12
  -4  -1   2   48.09    2.24
   4   1  -2   44.68    2.15
  -4  -1   2   41.94    2.16
   4   1  -2   44.55    2.10
   5   1  -2   14.99    1.28
   5   1  -2   12.24    1.25
  -5  -1   2   13.66    1.35
  -5  -1   2   13.91    1.30
   5   1  -2   11.78    1.20
  -5  -1   2   11.64    1.15
   5   1  -2   14.72    1.17
  -6  -1   2    3.17    0.85
  -6  -1   2    4.27    0.94
  -6  -1   2    5.65    1.00
  -6  -1   2    5.08    1.07
   6   1  -2    4.15    0.89
   6   1  -2    2.01    0.89
  -6  -1   2    2.87    0.66
   6   1  -2    3.89    0.92
   7   1  -2   44.27    2.79
  -7  -1   2   37.92    2.65
   7   1  -2   42.72    2.56
  -7  -1   2   41.87    2.60
  -7  -1   2   42.07    2.24
  -7  -1   2   39.87    2.54
   7   1  -2   39.52    2.49
  -8  -1   2    2.12    0.97
   8   1  -2    1.90    1.13
   8   1  -2    2.16    0.97
  -8  -1   2    2.60    1.16
  -8  -1   2    1.07    1.20
  -9  -1   2   20.93    2.07
  -9  -1   2   25.37    2.37
   9   1  -2   21.18    1.88
   9   1  -2   24.93    2.33
  -9  -1   2   22.07    2.17
 -10  -1   2    7.78    1.63
  10   1  -2   13.85    1.91
 -11  -1   2    1.38    1.36
 -12  -1   2    2.26    1.58
 -13  -1   2   -0.29    1.45
 -13   2  -2   -1.09    1.45
  13  -2   2    0.29    1.68
  12  -2   2    0.75    1.48
 -12   2  -2   -0.20    1.29
 -11   2  -2    3.20    1.41
  11  -2   2    4.01    1.57
 -11   2  -2    4.19    1.23
 -10   2  -2   -0.29    1.03
  10  -2   2   -0.22    1.27
 -10   2  -2    0.82    0.98
  -9   2  -2    9.18    1.29
   9  -2   2    9.17    1.45
   9  -2   2   10.12    1.68
   8  -2   2   15.88    1.51
  -8   2  -2   15.37    1.44
   8  -2   2   15.20    1.84
  -8   2  -2   15.93    1.73
   8  -2   2   16.00    1.66
  -8   2  -2   15.55    1.61
  -8   2  -2   17.80    1.47
  -7   2  -2    0.89    0.67
  -7   2  -2    1.38    0.60
   7  -2   2    1.02    0.62
   7  -2   2    1.44    0.77
  -7   2  -2    0.91    0.64
   7  -2   2    0.28    0.83
  -7   2  -2   -0.32    0.74
   6  -2   2    4.60    1.02
   6  -2   2    6.34    0.87
  -6   2  -2    5.88    0.74
   6  -2   2    3.76    0.87
  -6   2  -2    4.92    0.80
   6  -2   2    5.75    0.82
  -6   2  -2    3.76    0.77
  -6   2  -2    5.50    0.91
  -6   2  -2    4.64    0.97
  -5   2  -2  120.29    4.62
  -5   2  -2  120.90    4.87
   5  -2   2  123.00    4.88
   5  -2   2  122.52    4.94
  -5   2  -2  119.39    4.59
   5  -2   2  124.05    4.58
   5  -2   2  129.74    4.89
  -5   2  -2  125.03    4.85
  -5   2  -2  136.24    4.71
   4  -2   2    0.06    0.13
   4  -2   2    0.90    0.52
  -4   2  -2   -0.51    0.41
   4  -2   2   -0.47    0.40
  -4   2  -2    0.48    0.40
   4  -2   2    0.47    0.31
  -4   2  -2    0.33    0.37
   4  -2   2    0.24    0.38
  -4   2  -2    0.59    0.38
   4  -2   2    0.11    0.39
   3  -2   2    5.74    0.71
   3  -2   2    3.98    0.48
   3  -2   2    5.82    0.49
   3  -2   2    6.25    0.67
   3  -2   2    5.46    0.63
  -3   2  -2    5.21    0.58
  -3   2  -2    5.77    0.63
   3  -2   2    6.77    0.70
  -3   2  -2    6.11    0.61
  -3   2  -2    6.21    0.71
   2  -2   2   76.97    2.73
   2  -2   2   61.79    2.82
  -2   2  -2   82.40    2.80
  -2   2  -2   64.40    2.69
   2  -2   2   78.09    2.95
  -2   2  -2   71.65    2.84
  -2   2  -2   62.43    2.82
   2  -2   2   87.74    2.79
   2  -2   2   78.53    2.91
  -1   2  -2  111.12    4.04
  -1   2  -2  111.86    4.05
   1  -2   2  115.63    3.90
   1  -2   2  107.74    4.09
  -1   2  -2  108.68    3.92
  -1   2  -2  116.95    4.08
   1  -2   2  109.55    4.07
  -1   2  -2  110.67    3.87
   1  -2   2  116.08    4.08
   1  -2   2  111.55    3.86
   0  -2   2 1873.22   57.71
   0   2  -2 1770.95   59.37
   0   2  -2 1760.23   59.56
   0  -2   2 1748.52   59.43
   0   2  -2 1820.02   57.78
   0  -2   2 1786.33   59.59
   0  -2   2 1800.74   59.63
   0  -2   2 1859.64   59.36
   0  -2   2 1873.07   57.72
   0   2  -2 1757.38   57.67
   0  -2   2 1744.77   57.67
  -1  -2   2   17.72    0.98
   1   2  -2   16.88    0.88
   1   2  -2   16.49    1.02
  -1  -2   2   14.32    1.02
   1   2  -2   16.80    0.94
  -1  -2   2   17.41    0.99
   1   2  -2   15.61    0.93
   1   2  -2   17.84    0.93
  -1  -2   2   16.02    0.83
   2   2  -2  243.81    8.18
  -3  -2   2   33.22    1.54
  -3  -2   2   34.84    1.76
   3   2  -2   34.46    1.69
  -3  -2   2   37.72    1.81
   3   2  -2   36.32    1.62
  -3  -2   2   36.29    1.83
   3   2  -2   34.80    1.72
   3   2  -2   35.75    1.80
  -4  -2   2  272.55   10.52
  -4  -2   2  306.14   10.02
  -4  -2   2  301.43   10.58
  -4  -2   2  309.54   10.54
   4   2  -2  300.86   10.49
   4   2  -2  269.87   10.15
   4   2  -2  325.99   10.16
   4   2  -2  299.68   10.54
  -5  -2   2  165.13    6.55
   5   2  -2  177.45    6.37
  -5  -2   2  166.09    6.59
   5   2  -2  175.72    6.24
  -5  -2   2  180.14    6.62
   5   2  -2  168.69    6.55
   5   2  -2  172.15    6.50
  -5  -2   2  174.50    6.11
   6   2  -2  120.02    4.89
  -6  -2   2  124.92    4.63
  -6  -2   2  132.56    5.17
   6   2  -2  117.86    5.07
  -6  -2   2  117.52    5.11
   6   2  -2  130.57    4.82
  -6  -2   2  115.63    5.02
   6   2  -2  117.88    4.98
  -6  -2   2  114.50    5.07
   7   2  -2  187.29    7.00
  -7  -2   2  177.24    7.23
  -7  -2   2  171.39    7.14
   7   2  -2  177.73    7.22
  -7  -2   2  176.78    7.23
  -8  -2   2   43.20    2.87
   8   2  -2   44.17    2.89
  -8  -2   2   41.70    2.79
  -8  -2   2   38.98    2.65
   8   2  -2   39.53    2.52
  -9  -2   2    7.76    1.48
  -9  -2   2    5.85    1.32
   9   2  -2    7.54    1.29
   9   2  -2    8.38    1.55
 -10  -2   2   -0.86    1.06
 -11  -2   2    1.16    1.34
 -12  -2   2    2.29    1.48
  13  -3   2   -0.63    1.67
 -13   3  -2   -0.22    1.54
 -12   3  -2    1.69    1.45
  12  -3   2    1.35    1.63
  11  -3   2    3.76    1.66
 -11   3  -2    2.46    1.34
 -10   3  -2   10.15    1.67
  10  -3   2    7.80    1.72
 -10   3  -2    8.50    1.30
  -9   3  -2   15.54    1.54
  -9   3  -2   16.86    1.87
   9  -3   2   12.81    1.66
   9  -3   2   17.82    2.03
  -9   3  -2   16.99    1.51
  -8   3  -2   26.82    2.18
  -8   3  -2   29.95    1.98
   8  -3   2   26.67    2.11
   8  -3   2   24.98    2.31
  -8   3  -2   29.26    1.80
  -7   3  -2   -0.70    0.59
  -7   3  -2   -0.61    0.61
   7  -3   2   -0.54    0.43
   7  -3   2   -1.29    0.43
  -7   3  -2   -1.15    0.50
   7  -3   2   -0.84    0.71
   7  -3   2   -1.50    0.82
  -7   3  -2   -1.15    0.73
  -7   3  -2   -0.30    0.63
  -6   3  -2  105.61    4.11
  -6   3  -2  115.08    4.36
   6  -3   2  107.13    4.25
   6  -3   2  112.91    4.57
  -6   3  -2  104.52    4.53
  -6   3  -2  107.87    4.46
   6  -3   2  109.52    4.66
   6  -3   2  107.58    4.56
  -6   3  -2  104.57    4.27
  -5   3  -2    6.51    0.91
   5  -3   2    5.91    0.93
  -5   3  -2    6.62    0.82
  -5   3  -2    6.04    0.85
   5  -3   2    6.95    0.79
  -5   3  -2    5.65    0.80
   5  -3   2    6.70    0.89
   5  -3   2    6.07    0.85
   4  -3   2    0.26    0.26
   4  -3   2   -0.39    0.53
  -4   3  -2   -0.07    0.39
  -4   3  -2    0.18    0.46
   4  -3   2    0.21    0.35
   4  -3   2   -0.06    0.38
  -4   3  -2    0.78    0.44
   4  -3   2   -0.51    0.43
   4  -3   2    0.56    0.46
  -4   3  -2   -0.26    0.37
   3  -3   2   33.76    1.69
   3  -3   2   30.10    1.44
  -3   3  -2   31.67    1.57
  -3   3  -2   33.96    1.52
   3  -3   2   30.86    1.63
   3  -3   2   27.58    1.64
   3  -3   2   32.03    1.25
  -3   3  -2   31.41    1.53
  -3   3  -2   31.75    1.64
   2  -3   2  177.49    6.33
  -2   3  -2  172.60    6.24
   2  -3   2  156.33    6.27
   2  -3   2  182.61    6.30
  -2   3  -2  189.07    6.09
  -2   3  -2  168.87    6.03
  -2   3  -2  169.21    6.26
   2  -3   2  184.98    6.33
   2  -3   2  183.99    5.99
   1  -3   2   95.73    3.89
   1  -3   2  108.56    3.88
   1  -3   2  105.55    3.62
  -1   3  -2  103.99    3.68
   1  -3   2  106.33    3.88
  -1   3  -2  105.22    3.83
  -1   3  -2  105.14    3.87
   1  -3   2  101.27    3.88
  -1   3  -2  102.33    3.72
   0  -3   2   10.22    0.80
   0   3  -2    9.55    0.72
   0  -3   2   10.34    0.81
   0  -3   2    9.92    0.78
   0  -3   2   11.46    0.66
   0   3  -2    9.89    0.68
   0   3  -2    9.52    0.75
   0  -3   2    8.63    0.85
   0   3  -2    9.74    0.84
  -1  -3   2  288.22    9.39
   1   3  -2  291.19    9.49
   1   3  -2  288.11    9.84
   1   3  -2  287.37    9.85
   1   3  -2  279.82    9.56
   1   3  -2  281.88    9.56
  -1  -3   2  269.66    9.86
  -1  -3   2  298.87    9.91
  -1  -3   2  276.51    9.88
  -1  -3   2  295.17    9.84
  -2  -3   2    2.49    0.50
  -2  -3   2    2.90    0.50
   2   3  -2    3.36    0.50
  -2  -3   2    1.92    0.47
  -2  -3   2    3.96    0.63
   2   3  -2    4.29    0.59
   2   3  -2    3.51    0.47
   3   3  -2  229.51    7.84
  -3  -3   2  231.56    7.72
  -3  -3   2  243.50    8.29
  -3  -3   2  215.95    8.20
   3   3  -2  228.00    7.96
   3   3  -2  229.80    8.15
   3   3  -2  230.25    8.20
  -3  -3   2  234.26    8.17
  -3  -3   2  223.23    8.21
  -4  -3   2    0.83    0.58
  -4  -3   2    1.36    0.61
   4   3  -2    1.54    0.61
  -4  -3   2    0.55    0.51
   4   3  -2    0.91    0.54
  -4  -3   2    0.97    0.54
  -4  -3   2    0.04    0.48
  -5  -3   2   -0.52    0.60
   5   3  -2   -0.02    0.57
   5   3  -2    0.38    0.49
  -5  -3   2    0.31    0.48
   5   3  -2    0.03    0.53
  -5  -3   2    0.72    0.63
  -5  -3   2    0.81    0.51
  -5  -3   2    0.51    0.44
   5   3  -2   -0.52    0.60
  -5  -3   2    0.84    0.76
   6   3  -2  194.41    7.46
   6   3  -2  218.45    7.43
   6   3  -2  205.62    7.79
  -6  -3   2  199.93    7.79
  -6  -3   2  198.34    7.78
  -6  -3   2  190.04    7.84
   6   3  -2  208.22    7.66
   7   3  -2   26.39    1.95
   7   3  -2   25.45    2.22
  -7  -3   2   26.20    2.13
  -7  -3   2   21.83    2.01
  -7  -3   2   21.90    2.08
  -8  -3   2   -0.13    1.03
   8   3  -2   -0.20    1.06
   8   3  -2    0.01    0.82
  -8  -3   2    1.24    1.00
  -8  -3   2    1.37    1.03
  -9  -3   2   -0.74    0.96
  -9  -3   2    0.19    0.89
   9   3  -2    0.62    0.82
 -10  -3   2    6.43    1.55
 -10  -3   2    4.71    1.33
 -11  -3   2    0.19    1.26
 -12  -3   2    3.89    1.60
  13  -4   2   -0.61    1.76
 -12   4  -2   -0.44    1.39
  12  -4   2    3.12    1.79
  11  -4   2   -0.55    1.43
 -11   4  -2   -1.76    1.16
  10  -4   2    2.80    1.41
 -10   4  -2    2.89    1.35
   9  -4   2   33.94    2.53
   9  -4   2   33.45    2.74
  -9   4  -2   36.53    2.41
  -9   4  -2   35.82    2.06
  -9   4  -2   31.26    2.55
   8  -4   2    3.27    1.10
  -8   4  -2    3.36    1.01
  -8   4  -2    3.53    1.19
   8  -4   2    3.20    1.28
   7  -4   2   26.27    1.78
   7  -4   2   25.85    2.12
  -7   4  -2   25.62    1.98
  -7   4  -2   22.49    1.74
  -7   4  -2   25.00    1.93
   7  -4   2   24.82    1.97
  -6   4  -2    8.46    1.10
  -6   4  -2    8.76    1.06
  -6   4  -2    9.19    1.07
   6  -4   2    9.10    1.11
   6  -4   2    9.00    1.23
   6  -4   2    9.36    1.01
  -6   4  -2    8.60    1.15
   6  -4   2    6.83    1.13
  -5   4  -2  137.39    5.29
   5  -4   2  139.58    5.63
   5  -4   2  141.77    5.19
  -5   4  -2  146.13    5.32
  -5   4  -2  138.82    5.45
  -5   4  -2  139.96    5.55
   5  -4   2  141.68    5.58
   5  -4   2  149.17    5.57
   4  -4   2  169.35    6.56
   4  -4   2  180.39    6.17
   4  -4   2  169.07    6.57
  -4   4  -2  169.24    6.27
  -4   4  -2  177.73    6.47
   4  -4   2  189.14    6.59
  -4   4  -2  182.97    6.30
   4  -4   2  168.50    6.52
  -4   4  -2  178.00    6.56
  -3   4  -2   53.68    2.33
   3  -4   2   57.62    2.22
   3  -4   2   51.06    2.44
  -3   4  -2   58.10    2.34
   3  -4   2   55.52    2.47
  -3   4  -2   53.62    2.37
  -3   4  -2   56.13    2.47
   3  -4   2   56.68    2.48
   3  -4   2   51.03    2.48
   2  -4   2   83.49    3.34
  -1   4  -2   19.75    1.09
   1  -4   2   18.20    1.25
  -1   4  -2   19.31    1.07
   1  -4   2   22.38    1.24
  -1   4  -2   18.07    1.10
   1  -4   2   19.09    1.18
  -1   4  -2   21.24    1.21
   0   4  -2    2.30    0.43
   0  -4   2    2.71    0.54
   0   4  -2    1.83    0.40
   0   4  -2    1.62    0.42
   0   4  -2    2.62    0.53
   0  -4   2    2.07    0.48
   0  -4   2    2.79    0.56
  -1  -4   2   49.88    2.28
  -1  -4   2   54.96    2.30
   1   4  -2   49.32    2.15
   1   4  -2   53.36    2.09
  -1  -4   2   48.41    2.26
   1   4  -2   51.40    2.15
   1   4  -2   52.37    2.28
   2   4  -2   35.29    1.63
   2   4  -2   36.79    1.72
  -2  -4   2   39.25    1.85
  -2  -4   2   32.56    1.82
   2   4  -2   37.35    1.83
  -2  -4   2   34.79    1.80
  -3  -4   2  128.86    5.11
  -3  -4   2  138.61    5.08
   3   4  -2  134.82    4.83
   3   4  -2  132.83    4.93
  -3  -4   2  129.16    5.11
  -3  -4   2  126.41    5.17
   3   4  -2  135.83    5.10
  -3  -4   2  138.82    5.16
  -4  -4   2   20.10    1.45
   4   4  -2   19.64    1.46
   4   4  -2   17.29    1.32
  -4  -4   2   17.34    1.39
  -4  -4   2   19.46    1.49
  -4  -4   2   18.72    1.47
  -4  -4   2   16.35    1.37
   4   4  -2   19.93    1.27
   5   4  -2   -0.35    0.53
  -5  -4   2   -0.03    0.64
   5   4  -2    0.41    0.54
   5   4  -2    0.14    0.68
  -5  -4   2    0.23    0.69
  -5  -4   2    0.41    0.62
  -5  -4   2    0.02    0.57
  -5  -4   2   -0.36    0.67
  -6  -4   2   22.79    1.91
  -6  -4   2   21.01    1.77
   6   4  -2   22.19    1.84
   6   4  -2   19.88    1.60
  -6  -4   2   21.34    1.85
  -6  -4   2   21.24    1.79
  -7  -4   2    3.56    1.18
  -7  -4   2    3.92    1.07
  -7  -4   2    4.95    1.27
   7   4  -2    4.69    1.13
   7   4  -2    2.90    0.97
   8   4  -2    5.31    1.12
  -8  -4   2    3.77    1.23
  -8  -4   2    1.58    0.95
  -9  -4   2    3.45    1.27
   9   4  -2    2.12    1.02
  -9  -4   2    4.09    1.24
 -10  -4   2    0.37    1.00
 -10  -4   2   -0.65    1.11
 -11  -4   2    0.89    1.36
 -12  -4   2   -0.97    1.31
  13  -5   2   -0.54    1.73
  12  -5   2    1.55    1.56
  11  -5   2    5.79    1.78
 -10   5  -2   -1.08    1.00
  10  -5   2   -0.41    1.18
  -9   5  -2    1.43    0.96
  -9   5  -2    1.37    1.12
   9  -5   2   -0.24    1.12
   9  -5   2    1.44    1.13
  -8   5  -2    2.37    0.99
  -8   5  -2    1.44    1.06
   8  -5   2    1.56    1.07
   8  -5   2    1.98    1.19
  -7   5  -2   20.03    1.83
   7  -5   2   17.97    1.78
   7  -5   2   21.06    1.97
  -7   5  -2   21.05    1.70
  -6   5  -2   46.07    2.39
   6  -5   2   45.91    2.46
   6  -5   2   38.85    2.41
  -6   5  -2   43.44    2.36
   6  -5   2   40.06    2.51
  -6   5  -2   43.62    2.48
  -6   5  -2   41.73    2.29
   5  -5   2   63.78    3.01
   5  -5   2   59.19    3.00
  -5   5  -2   65.02    3.03
  -5   5  -2   60.51    2.86
   5  -5   2   65.27    3.04
  -5   5  -2   67.56    2.89
  -5   5  -2   60.40    2.83
   5  -5   2   60.81    3.08
  -4   5  -2    5.20    0.77
  -4   5  -2    4.19    0.86
   4  -5   2    7.07    0.94
  -4   5  -2    6.12    0.78
   4  -5   2    3.31    0.88
   4  -5   2    5.05    0.86
  -4   5  -2    6.68    0.84
   4  -5   2    5.49    0.85
   3  -5   2   52.47    2.44
   3  -5   2   51.78    2.42
  -3   5  -2   52.92    2.26
  -3   5  -2   50.83    2.40
   3  -5   2   51.33    2.43
   3  -5   2   44.23    2.41
  -3   5  -2   51.87    2.31
  -2   5  -2  111.23    4.17
  -2   5  -2  118.39    4.15
  -2   5  -2  112.41    4.31
   2  -5   2  115.33    4.39
   2  -5   2  107.12    4.33
   2  -5   2  109.61    4.35
   1  -5   2   15.98    0.87
   1  -5   2   16.70    1.16
   1  -5   2   13.38    1.15
  -1   5  -2   13.60    1.02
  -1   5  -2   14.48    1.00
   1  -5   2   18.27    1.18
  -1   5  -2   18.16    1.22
   0   5  -2   11.26    1.03
   0   5  -2    9.77    0.82
   0  -5   2    9.10    0.80
   0  -5   2   11.49    1.01
   0  -5   2    9.10    0.84
   0  -5   2   10.39    0.92
   0   5  -2   10.61    0.91
   0  -5   2   10.64    0.98
  -1  -5   2    0.51    0.47
   1   5  -2   -0.04    0.48
  -1  -5   2    0.51    0.51
  -1  -5   2   -0.55    0.38
   1   5  -2    0.45    0.40
  -1  -5   2    0.30    0.44
   1   5  -2   -0.59    0.29
  -1  -5   2    0.30    0.46
  -2  -5   2   40.54    1.98
  -2  -5   2   35.33    1.93
   2   5  -2   37.73    1.95
  -2  -5   2   35.99    1.94
   2   5  -2   38.73    1.76
  -2  -5   2   39.39    1.97
  -2  -5   2   34.81    1.95
   2   5  -2   36.67    1.82
   3   5  -2    5.92    0.71
  -3  -5   2    5.81    0.91
  -3  -5   2    6.50    0.89
   3   5  -2    6.78    0.82
  -3  -5   2    5.99    0.88
  -3  -5   2    7.06    0.92
   3   5  -2    7.27    0.91
  -4  -5   2   20.69    1.57
  -4  -5   2   25.29    1.77
  -4  -5   2   27.01    1.72
  -4  -5   2   22.75    1.68
   4   5  -2   23.13    1.67
  -4  -5   2   24.24    1.71
   4   5  -2   24.10    1.46
   4   5  -2   23.52    1.58
   5   5  -2    0.63    0.62
  -5  -5   2    0.81    0.77
   5   5  -2    1.43    0.81
   5   5  -2    1.70    0.69
  -5  -5   2    1.41    0.86
  -5  -5   2    0.09    0.64
  -5  -5   2    0.89    0.77
  -5  -5   2    1.46    0.86
  -6  -5   2    8.43    1.26
  -6  -5   2   11.04    1.38
   6   5  -2    7.87    1.15
  -6  -5   2    7.67    1.33
  -7  -5   2    7.58    1.42
   7   5  -2    6.80    1.16
  -7  -5   2    9.87    1.38
  -7  -5   2    5.99    1.30
  -8  -5   2    0.46    0.93
  -8  -5   2    0.41    1.05
   8   5  -2    0.45    0.88
   9   5  -2    1.36    1.06
  -9  -5   2    0.78    1.17
  -9  -5   2    2.99    1.22
 -10  -5   2    0.35    1.13
 -10  -5   2    1.95    1.36
 -11  -5   2   -0.30    1.24
  12  -6   2    5.12    1.91
  11  -6   2   -0.47    1.56
  10  -6   2    0.03    1.32
  -9   6  -2    0.34    0.91
   9  -6   2    1.19    1.23
   9  -6   2    1.10    1.15
   8  -6   2    8.50    1.59
   8  -6   2    8.84    1.48
  -8   6  -2    8.42    1.44
  -8   6  -2    9.25    1.34
   7  -6   2   10.90    1.46
  -7   6  -2    9.67    1.44
   7  -6   2   11.15    1.57
  -7   6  -2   11.49    1.33
  -6   6  -2    5.96    1.15
  -6   6  -2    5.65    1.02
   6  -6   2    7.32    1.20
   6  -6   2    7.74    1.27
  -5   6  -2   89.31    3.97
   5  -6   2   86.87    4.00
   5  -6   2   89.08    4.04
  -5   6  -2   86.52    3.78
   5  -6   2   90.83    4.04
   5  -6   2   95.29    4.04
  -5   6  -2   92.04    3.82
   4  -6   2    1.22    0.64
   4  -6   2    0.95    0.71
   4  -6   2    0.87    0.68
  -4   6  -2   -0.64    0.58
  -4   6  -2    0.88    0.60
   4  -6   2   -0.33    0.58
  -4   6  -2   -0.34    0.52
  -3   6  -2   80.93    3.17
  -3   6  -2   72.42    3.15
   3  -6   2   77.02    3.39
   3  -6   2   78.26    3.37
   3  -6   2   72.45    3.31
  -3   6  -2   79.28    3.35
  -2   6  -2    8.51    0.90
   2  -6   2    9.78    1.05
  -2   6  -2   11.49    1.06
   2  -6   2    9.91    1.03
   2  -6   2   10.53    1.07
   2  -6   2    8.77    0.94
  -2   6  -2    9.75    0.90
  -1   6  -2   31.68    1.65
   1  -6   2   30.76    1.76
   1  -6   2   31.11    1.45
   1  -6   2   30.90    1.69
   1  -6   2   33.46    1.77
  -1   6  -2   33.32    1.77
   1  -6   2   30.09    1.74
  -1   6  -2   32.69    1.58
   0   6  -2   13.85    1.00
   0   6  -2   16.88    1.14
   0  -6   2   13.55    1.18
   0  -6   2   14.14    1.15
   0  -6   2   14.06    1.02
   0  -6   2   14.52    1.14
   0  -6   2   14.28    1.17
   0   6  -2   16.58    1.25
  -1  -6   2   72.92    3.23
   1   6  -2   77.35    3.24
   1   6  -2   79.04    3.14
  -1  -6   2   78.17    3.25
  -1  -6   2   73.67    3.27
   1   6  -2   78.14    3.03
  -1  -6   2   83.20    3.35
  -1  -6   2   76.00    3.15
  -2  -6   2   22.24    1.48
   2   6  -2   20.65    1.36
  -2  -6   2   19.81    1.45
  -2  -6   2   18.55    1.44
   2   6  -2   19.40    1.23
   2   6  -2   19.58    1.34
  -2  -6   2   19.96    1.45
  -2  -6   2   20.80    1.46
  -2  -6   2   19.87    1.37
   2   6  -2   19.73    1.47
  -3  -6   2   13.10    1.30
   3   6  -2   14.05    1.08
  -3  -6   2   15.67    1.34
  -3  -6   2   14.41    1.22
   3   6  -2   13.16    1.16
  -3  -6   2   12.75    1.31
  -3  -6   2   13.08    1.29
   3   6  -2   16.21    1.38
  -4  -6   2    9.53    1.14
   4   6  -2    8.19    1.03
   4   6  -2    7.96    1.07
   4   6  -2    8.32    0.90
  -4  -6   2    6.30    0.86
  -4  -6   2    8.74    1.12
  -4  -6   2    8.82    1.21
  -4  -6   2    8.23    1.13
  -5  -6   2    3.13    0.96
   5   6  -2    1.89    0.79
  -5  -6   2    2.11    0.92
  -5  -6   2    0.20    0.83
  -5  -6   2    1.90    0.80
  -5  -6   2    3.23    0.98
  -6  -6   2    3.97    1.22
  -6  -6   2    3.56    0.99
  -6  -6   2    4.37    1.05
   6   6  -2    4.30    0.98
   7   6  -2    1.57    0.85
  -7  -6   2   -0.41    0.80
  -7  -6   2   -0.57    0.88
  -8  -6   2   -1.62    0.93
  -8  -6   2   -0.11    0.85
   8   6  -2    0.99    0.87
  -9  -6   2    8.04    1.63
  -9  -6   2    5.34    1.39
   9   6  -2    5.30    1.36
 -10  -6   2    1.79    1.46
 -10  -6   2    3.65    1.40
 -11  -6   2   -0.10    1.24
  12  -7   2    5.49    2.09
  11  -7   2    1.09    1.62
  10  -7   2   -2.51    1.27
   9  -7   2   -1.33    1.19
   9  -7   2   -1.38    1.06
  -9   7  -2   -0.86    0.93
   8  -7   2    0.44    1.14
  -8   7  -2   -0.15    0.88
   8  -7   2   -1.37    0.88
  -7   7  -2    1.38    0.88
   7  -7   2    2.15    1.08
   7  -7   2    2.49    1.13
   6  -7   2    7.24    1.35
  -6   7  -2    6.93    1.18
   6  -7   2    5.54    1.22
   5  -7   2   21.47    1.84
   5  -7   2   21.20    1.77
   5  -7   2   20.78    1.76
  -5   7  -2   19.40    1.62
   4  -7   2   26.48    1.83
   4  -7   2   22.50    1.77
   4  -7   2   25.70    1.84
  -4   7  -2   24.00    1.63
  -4   7  -2   25.75    1.76
  -4   7  -2   24.97    1.65
   3  -7   2   -0.40    0.57
   3  -7   2    0.11    0.65
  -3   7  -2    0.01    0.56
  -3   7  -2    0.08    0.59
   3  -7   2    0.06    0.74
  -3   7  -2   -0.79    0.54
   3  -7   2    1.17    0.72
   2  -7   2    0.65    0.60
  -2   7  -2    1.60    0.62
  -2   7  -2    2.44    0.70
  -2   7  -2    2.25    0.62
   2  -7   2    1.07    0.67
   2  -7   2    0.68    0.60
   2  -7   2    1.62    0.73
  -1   7  -2   29.15    1.67
   1  -7   2   27.32    1.74
   1  -7   2   28.67    1.82
  -1   7  -2   28.44    1.59
  -1   7  -2   31.08    1.77
   1  -7   2   31.53    1.83
   1  -7   2   30.61    1.69
   1  -7   2   29.37    1.43
   0   7  -2    4.79    0.71
   0  -7   2    3.75    0.82
   0   7  -2    4.19    0.74
   0  -7   2    5.10    0.79
   0  -7   2    3.84    0.70
   0  -7   2    4.33    0.79
   0  -7   2    3.83    0.77
   0   7  -2    4.66    0.83
   1   7  -2   88.62    3.61
   1   7  -2   88.95    3.73
  -1  -7   2   88.02    3.79
  -1  -7   2   85.15    3.65
   1   7  -2   89.06    3.49
  -1  -7   2   88.36    3.71
  -1  -7   2   91.57    3.80
  -1  -7   2   92.10    3.63
  -2  -7   2    1.28    0.67
   2   7  -2    1.65    0.60
  -2  -7   2    1.30    0.59
  -2  -7   2    0.95    0.69
  -2  -7   2    2.47    0.74
  -2  -7   2    2.93    0.76
   2   7  -2    2.50    0.71
  -3  -7   2   13.39    1.31
   3   7  -2   14.30    1.26
  -3  -7   2   12.76    1.30
  -3  -7   2   13.11    1.25
   3   7  -2   11.78    1.18
  -3  -7   2   12.75    1.22
  -3  -7   2   14.29    1.42
   3   7  -2   12.64    1.12
   4   7  -2   12.34    1.28
  -4  -7   2   12.45    1.47
  -4  -7   2   10.53    1.32
  -4  -7   2   12.40    1.35
   4   7  -2   12.41    1.20
  -4  -7   2   13.53    1.43
  -5  -7   2   -0.78    0.88
  -5  -7   2   -0.61    0.78
  -5  -7   2   -0.87    0.71
  -5  -7   2   -0.16    0.81
   5   7  -2   -0.27    0.70
   6   7  -2    5.64    1.12
  -6  -7   2    7.39    1.24
  -6  -7   2    6.77    1.26
  -6  -7   2    8.03    1.50
  -7  -7   2   -0.35    0.93
  -7  -7   2    0.12    0.91
   7   7  -2   -0.25    0.74
   8   7  -2    0.13    0.89
  -8  -7   2    0.04    1.07
  -8  -7   2    0.22    0.94
  -9  -7   2    0.70    1.17
  -9  -7   2    0.34    1.03
   9   7  -2   -0.55    0.94
 -10  -7   2    2.24    1.36
 -10  -7   2    3.95    1.47
  11  -8   2    0.78    1.74
  10  -8   2   -0.42    1.42
  10  -8   2   -1.00    1.23
   9  -8   2    3.80    1.47
   9  -8   2    1.75    1.30
  -9   8  -2    2.77    1.20
  -8   8  -2   15.83    1.76
   8  -8   2   15.29    1.96
   8  -8   2   14.58    2.00
   7  -8   2    1.60    1.22
   7  -8   2    0.67    1.04
  -7   8  -2    0.44    0.91
  -6   8  -2    0.78    0.88
   6  -8   2    1.79    1.05
   6  -8   2    1.88    1.11
   5  -8   2    4.06    1.05
   5  -8   2    3.42    1.10
  -5   8  -2    4.03    0.97
   4  -8   2   10.92    1.31
  -4   8  -2   12.11    1.27
  -4   8  -2   13.09    1.25
   4  -8   2   11.43    1.31
   4  -8   2   12.04    1.35
   3  -8   2    9.19    1.20
   3  -8   2    5.87    1.08
  -3   8  -2   10.20    1.15
   3  -8   2   10.41    1.22
  -3   8  -2   11.01    1.10
   2  -8   2    2.49    0.81
  -2   8  -2    1.27    0.70
   2  -8   2    1.23    0.75
  -2   8  -2    0.89    0.63
   2  -8   2    0.15    0.64
   2  -8   2    1.57    0.77
  -1   8  -2   -0.41    0.54
   1  -8   2    0.18    0.61
   1  -8   2   -0.11    0.64
   1  -8   2   -0.01    0.60
   1  -8   2    0.11    0.65
  -1   8  -2   -0.45    0.60
   1  -8   2   -0.61    0.44
   0  -8   2   11.90    1.05
   0  -8   2    9.84    1.10
   0  -8   2   10.38    1.17
   0   8  -2   12.31    1.15
   0  -8   2   10.31    1.19
   0   8  -2   12.16    1.11
   0  -8   2   12.68    1.11
  -1  -8   2    0.34    0.66
  -1  -8   2   -0.18    0.59
   1   8  -2    0.30    0.50
  -1  -8   2   -0.14    0.61
   1   8  -2    0.81    0.60
  -1  -8   2   -0.99    0.65
  -1  -8   2   -0.02    0.55
   2   8  -2    6.58    0.86
  -2  -8   2    7.08    1.03
  -2  -8   2    5.73    0.97
  -2  -8   2    6.80    0.99
   2   8  -2    6.73    0.97
  -2  -8   2    6.81    1.11
  -3  -8   2    0.12    0.61
  -3  -8   2    0.29    0.72
   3   8  -2   -0.29    0.66
   3   8  -2   -0.01    0.50
  -3  -8   2    0.03    0.85
   3   8  -2   -0.19    0.63
  -3  -8   2   -0.12    0.64
   4   8  -2   15.55    1.50
   4   8  -2   15.36    1.50
  -4  -8   2   17.95    1.84
  -4  -8   2   16.77    1.65
  -4  -8   2   17.77    1.60
   5   8  -2   10.75    1.41
  -5  -8   2   14.23    1.71
  -5  -8   2   14.60    1.59
  -5  -8   2   14.05    1.49
  -5  -8   2   10.46    1.50
   6   8  -2    1.21    0.90
  -6  -8   2    0.38    0.88
  -6  -8   2    1.60    0.96
  -7  -8   2    0.18    0.97
  -7  -8   2    0.64    0.98
   7   8  -2   -0.01    0.90
  -8  -8   2   -1.04    0.89
   8   8  -2   -0.90    0.92
  -8  -8   2    0.00    1.01
  -9  -8   2    4.07    1.38
   9   8  -2    4.59    1.37
  -9  -8   2    3.87    1.49
  10  -9   2    1.15    1.56
   9  -9   2   -0.29    1.32
  -9   9  -2    0.05    1.09
   9  -9   2   -1.37    1.12
  -8   9  -2   10.89    1.62
   8  -9   2    7.47    1.56
   8  -9   2    9.75    1.80
   7  -9   2    0.09    1.06
  -7   9  -2    1.26    1.01
   7  -9   2    1.63    1.18
  -6   9  -2    2.52    0.98
   6  -9   2    1.18    1.05
   6  -9   2    1.62    1.05
   5  -9   2    0.64    0.88
   5  -9   2    1.00    0.91
  -5   9  -2    0.20    0.77
   4  -9   2    5.83    1.10
  -4   9  -2    5.38    1.02
   4  -9   2    4.86    1.09
   3  -9   2    0.16    0.79
  -3   9  -2    1.04    0.79
   3  -9   2    0.83    0.80
   3  -9   2    0.39    0.78
   2  -9   2   10.82    1.33
   2  -9   2    9.86    1.18
  -2   9  -2    9.26    1.09
   2  -9   2    9.34    1.29
  -2   9  -2    9.82    1.23
  -1   9  -2    4.04    0.85
   1  -9   2    2.70    0.88
   1  -9   2    3.09    0.92
   1  -9   2    2.47    0.92
  -1   9  -2    3.25    0.91
   0   9  -2    6.64    1.00
   0   9  -2    5.50    0.87
   0  -9   2    6.34    0.99
   0  -9   2    8.14    1.11
   0  -9   2    5.88    0.87
   0  -9   2    7.98    1.10
  -1  -9   2    0.83    0.73
   1   9  -2    0.50    0.65
  -1  -9   2   -1.04    0.62
  -1  -9   2   -0.60    0.60
   1   9  -2    0.71    0.57
  -1  -9   2    0.29    0.63
  -2  -9   2    2.97    0.90
  -2  -9   2    3.15    0.90
   2   9  -2    2.82    0.82
  -2  -9   2    1.43    0.74
  -2  -9   2    2.52    0.73
  -3  -9   2    0.81    0.90
  -3  -9   2    1.51    0.87
  -3  -9   2    2.06    0.83
   3   9  -2    1.10    0.78
  -4  -9   2    0.21    0.84
  -4  -9   2    1.71    0.87
  -4  -9   2    1.03    0.99
   4   9  -2    2.00    0.85
   4   9  -2    1.72    0.89
   5   9  -2    1.93    0.91
   5   9  -2    0.25    0.89
  -5  -9   2    0.67    0.94
  -5  -9   2    0.03    0.82
  -5  -9   2    0.40    0.85
  -6  -9   2    2.12    0.98
   6   9  -2    0.74    0.92
  -6  -9   2    0.91    1.00
   6   9  -2    1.28    0.97
  -7  -9   2   -0.18    1.02
  -7  -9   2    0.40    1.04
   7   9  -2    0.86    0.96
  -8  -9   2   -0.99    1.04
  -8  -9   2    0.25    1.13
   8   9  -2    0.39    0.94
  10 -10   2    1.28    1.62
   9 -10   2    1.75    1.38
  -9  10  -2    3.29    1.34
   9 -10   2    1.43    1.51
  -8  10  -2    5.79    1.49
   8 -10   2    2.64    1.54
   8 -10   2    6.07    1.63
   7 -10   2    2.52    1.33
   7 -10   2   -0.98    1.12
  -7  10  -2   -0.04    1.02
  -6  10  -2    0.75    0.96
   6 -10   2   -0.01    0.93
   6 -10   2   -1.74    0.87
   5 -10   2    0.49    0.96
  -5  10  -2    2.29    0.99
   5 -10   2    0.69    0.94
   4 -10   2    1.71    0.88
  -4  10  -2    2.57    0.93
   4 -10   2    1.88    0.94
   3 -10   2    3.07    1.02
  -3  10  -2    1.50    0.93
   3 -10   2    2.76    0.90
  -2  10  -2    5.05    1.08
   2 -10   2    6.55    1.21
   2 -10   2    6.06    1.01
  -1  10  -2    1.76    0.87
   1 -10   2   -1.55    0.70
   1 -10   2   -0.28    0.80
   0  10  -2   25.63    1.86
   0 -10   2   28.37    1.66
   0 -10   2   25.06    1.71
   0 -10   2   27.24    2.01
  -1 -10   2    0.04    0.67
   1  10  -2    0.32    0.76
  -1 -10   2   -0.12    0.83
  -2 -10   2    3.65    0.86
  -2 -10   2    4.10    0.99
   2  10  -2    4.17    0.94
  -3 -10   2    0.19    0.84
  -3 -10   2   -0.07    0.70
   3  10  -2   -0.42    0.70
  -4 -10   2    1.00    0.77
   4  10  -2    1.75    0.88
  -4 -10   2    0.54    0.92
   5  10  -2    3.36    1.08
  -5 -10   2    1.62    1.09
  -5 -10   2    3.72    0.99
  -5 -10   2    1.26    1.07
   6  10  -2    3.65    1.18
   6  10  -2    1.75    1.14
  -6 -10   2    2.08    1.23
  -6 -10   2    3.28    1.14
   7  10  -2    1.17    1.07
   7  10  -2    0.34    1.15
  -7 -10   2    0.17    1.27
  -7 -10   2   -0.34    1.13
   8 -11   2    5.60    1.68
  -8  11  -2    3.01    1.33
   8 -11   2    2.76    1.40
  -7  11  -2    0.24    1.06
   7 -11   2    1.00    1.24
   7 -11   2   -0.65    1.12
   6 -11   2    0.64    1.06
   6 -11   2    1.24    1.04
  -6  11  -2    0.94    1.11
  -5  11  -2    1.23    0.98
   5 -11   2    0.41    0.98
   5 -11   2    0.74    0.96
  -4  11  -2    1.34    0.94
   4 -11   2    1.70    1.01
   4 -11   2    2.17    0.91
   3 -11   2    1.72    1.01
  -3  11  -2    1.36    0.98
   3 -11   2    1.84    0.84
  -2  11  -2    0.81    0.79
   2 -11   2    0.67    0.93
   2 -11   2    1.24    0.79
   1 -11   2    0.36    0.69
  -1  11  -2    0.83    0.84
   1 -11   2   -0.53    0.78
   0 -11   2   -0.11    0.89
   0  11  -2    0.09    0.83
   0 -11   2    1.23    0.68
  -1 -11   2    3.54    0.76
  -1 -11   2    3.76    1.15
   1  11  -2    4.89    1.12
   2  11  -2   -0.72    0.74
  -2 -11   2   -0.51    0.62
  -2 -11   2   -1.04    0.85
  -3 -11   2   -0.42    0.88
   3  11  -2   -0.03    0.76
  -3 -11   2    1.37    0.67
  -4 -11   2    1.06    1.05
  -4 -11   2    0.94    0.72
   4  11  -2    1.29    1.00
  -5 -11   2    0.52    1.21
  -5 -11   2    1.07    0.83
   5  11  -2    1.26    1.03
  -5 -11   2   -0.75    1.09
  -6 -11   2    4.22    1.52
   6  11  -2    4.72    1.42
  -6 -11   2    7.70    1.31
  -7  12  -2    0.88    1.09
   7 -12   2    2.73    1.32
   7 -12   2    2.77    1.31
  -6  12  -2    1.79    1.15
   6 -12   2    1.09    1.01
   6 -12   2    0.06    1.13
   5 -12   2    0.39    0.83
   5 -12   2   -0.78    0.95
  -5  12  -2   -0.87    0.95
  -4  12  -2    1.83    1.05
   4 -12   2    1.34    1.09
   4 -12   2    2.69    0.89
   3 -12   2   -0.58    0.98
  -3  12  -2    0.56    0.92
   3 -12   2    0.45    0.72
   2 -12   2    0.13    0.97
   2 -12   2    1.53    0.71
  -2  12  -2    0.65    0.91
   1 -12   2    5.39    1.30
  -1  12  -2    4.90    1.15
   0  12  -2   19.58    1.85
   0 -12   2   18.26    1.92
  -1 -12   2    1.83    1.15
   1  12  -2    3.30    1.12
  -2 -12   2   -0.66    0.95
   2  12  -2   -0.68    0.85
   3  12  -2    0.79    0.96
  -3 -12   2    0.81    0.92
  -4 -12   2    1.21    1.09
   4  12  -2    1.11    0.96
   4 -13   2   -1.67    0.94
  -4  13  -2    1.07    1.09
   3 -13   2   -1.05    0.92
  -3  13  -2    0.77    1.02
  -2  13  -2    2.42    1.14
   2 -13   2    1.54    1.08
   1 -13   2    0.35    1.06
  -1  13  -2   -0.04    0.92
   0  13  -2    1.69    1.08
   0 -13   2    1.23    1.11
  -1 -13   2    1.74    1.10
   1  13  -2    0.47    1.02
   1  15   3    1.31    0.75
   0 -15  -3    0.17    0.61
   0 -15  -3    0.07    0.72
   0  15   3   -0.27    0.64
   1 -15  -3    5.06    1.00
  -1  15   3    3.56    0.88
   1 -15  -3    5.08    0.85
  -2  15   3    1.25    0.73
   2 -15  -3    1.42    0.79
  -4 -14  -3    0.33    0.69
  -4 -14  -3    3.37    0.92
   4  14   3    1.24    0.76
   3  14   3   -0.38    0.56
  -3 -14  -3   -0.10    0.64
  -3 -14  -3   -0.09    0.64
   2  14   3    1.55    0.65
  -2 -14  -3    2.90    0.66
   2  14   3    2.98    0.60
  -1 -14  -3    3.06    0.80
   1  14   3    2.89    0.71
   1  14   3    3.02    0.59
   0  14   3    1.32    0.58
   0 -14  -3    0.28    0.73
   0  14   3    0.77    0.61
   0 -14  -3    1.14    0.64
   1 -14  -3    2.97    0.78
  -1  14   3    3.34    0.73
   1 -14  -3    1.94    0.83
  -1  14   3    3.89    0.82
  -2  14   3    5.02    0.89
   2 -14  -3    6.93    1.08
   2 -14  -3    5.70    0.98
   3 -14  -3    0.80    0.76
  -3  14   3    1.46    0.80
  -4  14   3    2.24    0.88
   4 -14  -3    2.67    1.01
   5 -14  -3   -0.44    0.87
  -5  14   3    0.32    0.85
  -6 -13  -3    0.78    0.87
   6  13   3    0.36    0.79
   5  13   3    0.08    0.69
  -5 -13  -3    1.39    0.80
  -5 -13  -3   -0.34    0.76
  -4 -13  -3    4.16    0.89
   4  13   3    2.89    0.67
   4  13   3    4.53    0.88
  -4 -13  -3    5.82    1.00
   3  13   3    0.38    0.45
   3  13   3    0.93    0.58
  -3 -13  -3   -0.19    0.70
  -3 -13  -3    0.69    0.57
   2  13   3    2.60    0.52
  -2 -13  -3    1.91    0.60
  -2 -13  -3    2.69    0.66
   2  13   3    2.42    0.60
   1  13   3   -0.05    0.42
   1  13   3    0.09    0.46
  -1 -13  -3    0.36    0.52
  -1 -13  -3    0.94    0.64
   0  13   3    0.45    0.50
   0 -13  -3   -0.41    0.52
   0  13   3    0.48    0.50
   0 -13  -3    1.16    0.69
   1 -13  -3    0.41    0.71
  -1  13   3    0.54    0.56
   1 -13  -3    0.38    0.60
  -1  13   3    0.68    0.56
  -2  13   3   -0.29    0.57
  -2  13   3    1.35    0.72
   2 -13  -3   -0.08    0.64
   2 -13  -3   -0.10    0.69
  -3  13   3   -0.26    0.61
   3 -13  -3    0.44    0.81
   3 -13  -3    1.30    0.78
  -4  13   3    0.29    0.71
   4 -13  -3   -0.81    0.80
  -5  13   3    1.24    0.91
   5 -13  -3    2.02    1.06
  -6  13   3   -0.07    0.90
   6 -13  -3    1.64    1.13
  -7  13   3    7.20    1.39
   7 -13  -3    7.32    1.02
   7 -13  -3    6.97    1.55
   8  12   3    0.51    0.84
  -8 -12  -3   -0.15    0.89
   7  12   3    0.22    0.73
  -7 -12  -3    1.25    0.91
  -6 -12  -3    3.31    1.01
   6  12   3    4.37    0.95
  -5 -12  -3   -1.00    0.73
  -5 -12  -3   -1.26    0.66
   5  12   3   -0.06    0.53
   5  12   3    0.21    0.58
   4  12   3    0.47    0.54
   4  12   3    0.04    0.48
  -4 -12  -3   -0.04    0.69
  -4 -12  -3    0.19    0.65
   3  12   3    6.93    0.80
  -3 -12  -3    6.36    0.82
  -3 -12  -3    7.68    0.89
  -3 -12  -3    8.10    0.94
   3  12   3    6.66    0.69
  -2 -12  -3   27.68    1.50
  -1 -12  -3    0.35    0.53
   0 -12  -3    3.83    0.76
   0 -12  -3    5.16    0.71
   0  12   3    5.71    0.64
   1 -12  -3    3.15    0.76
   1 -12  -3    2.69    0.68
  -1  12   3    4.30    0.65
  -1  12   3    1.15    0.57
  -2  12   3    0.87    0.60
   2 -12  -3    1.85    0.73
   2 -12  -3    0.67    0.64
  -2  12   3    0.91    0.60
  -3  12   3   -0.03    0.59
   3 -12  -3    0.43    0.75
  -3  12   3    0.51    0.65
   3 -12  -3    0.01    0.64
   4 -12  -3    0.42    0.76
  -4  12   3    0.55    0.67
   4 -12  -3    0.27    0.80
  -5  12   3    1.46    0.84
   5 -12  -3    1.09    0.94
   6 -12  -3   -0.87    0.90
  -6  12   3   -0.11    0.85
   6 -12  -3    1.39    0.75
   7 -12  -3    1.80    0.97
   7 -12  -3    1.66    1.28
  -7  12   3    1.99    1.02
   8 -12  -3   -0.70    0.98
  -8  12   3   -0.88    0.84
   8 -12  -3   -0.77    1.19
  -9 -11  -3    4.60    1.36
   9  11   3    2.64    1.13
   8  11   3    0.13    0.84
  -8 -11  -3   -1.02    0.81
   7  11   3    5.24    1.02
  -7 -11  -3    1.77    0.94
  -6 -11  -3    1.01    0.79
  -6 -11  -3    2.30    0.87
   6  11   3    1.40    0.74
   5  11   3    1.45    0.57
   5  11   3    0.26    0.56
  -5 -11  -3    0.15    0.67
  -5 -11  -3    1.14    0.75
  -4 -11  -3   13.31    1.22
  -4 -11  -3   14.86    1.30
   4  11   3   13.09    0.94
   4  11   3   13.73    1.10
   3  11   3    7.17    0.68
  -3 -11  -3    6.81    0.88
  -3 -11  -3    6.34    0.80
  -3 -11  -3    8.27    0.87
  -2 -11  -3   25.50    1.40
  -2 -11  -3   26.57    1.35
  -1 -11  -3    0.65    0.43
   0 -11  -3    9.45    0.83
   0 -11  -3    9.32    0.92
   1 -11  -3   10.32    0.96
  -1  11   3    7.55    0.75
   1 -11  -3    9.00    0.86
  -1  11   3    8.13    0.75
   2 -11  -3    5.05    0.85
   2 -11  -3    2.99    0.74
  -2  11   3    3.83    0.68
  -2  11   3    2.70    0.64
   3 -11  -3   -0.51    0.66
  -3  11   3   -1.22    0.51
  -3  11   3   -0.99    0.62
   3 -11  -3   -0.23    0.66
   4 -11  -3   28.53    2.06
  -4  11   3   26.77    1.75
   4 -11  -3   32.05    2.03
   5 -11  -3    5.18    0.80
  -5  11   3    5.39    1.03
   5 -11  -3    4.05    1.12
   6 -11  -3   14.48    1.39
   6 -11  -3   13.30    1.67
  -6  11   3   15.71    1.58
   7 -11  -3    2.50    1.23
  -7  11   3    1.50    0.98
   7 -11  -3    3.98    1.07
   8 -11  -3    2.29    1.32
   8 -11  -3    0.92    1.16
  -8  11   3    3.38    1.14
  -9  11   3    1.58    1.06
   9 -11  -3    0.43    1.31
   9 -11  -3   -0.18    1.24
 -10 -10  -3    3.47    1.44
 -10 -10  -3    5.73    1.23
  10  10   3    5.35    1.43
  -9 -10  -3    6.44    1.42
   9  10   3    4.89    1.20
  -9 -10  -3    4.60    0.99
  -8 -10  -3    0.83    0.62
   8  10   3    0.74    0.80
  -8 -10  -3    0.38    0.87
   7  10   3    0.59    0.73
  -7 -10  -3   -0.10    0.77
   6  10   3    0.22    0.56
  -6 -10  -3   -0.34    0.65
  -6 -10  -3   -0.51    0.65
   6  10   3    0.56    0.56
   5  10   3    2.85    0.69
  -5 -10  -3    2.95    0.81
  -5 -10  -3    2.88    0.80
   5  10   3    2.82    0.59
  -4 -10  -3    4.78    0.79
   4  10   3    3.91    0.64
  -4 -10  -3    4.70    0.80
   4  10   3    4.26    0.55
   3  10   3   14.83    1.48
  -3 -10  -3   12.05    1.03
  -3 -10  -3   11.87    0.99
   2  10   3    3.36    0.87
  -2 -10  -3    3.15    0.53
   1  10   3    7.37    1.01
   0 -10  -3   12.85    0.94
   0  10   3   15.80    1.27
   0 -10  -3   13.54    0.89
   1 -10  -3   -0.12    0.48
  -1  10   3   -0.51    0.49
   1 -10  -3   -0.18    0.44
  -2  10   3    7.59    0.81
   2 -10  -3    9.36    0.95
   2 -10  -3    7.55    0.88
  -2  10   3    8.58    0.78
  -3  10   3    2.64    0.73
   3 -10  -3    2.53    0.80
  -3  10   3    1.60    0.74
   3 -10  -3    1.26    0.78
  -4  10   3    0.82    0.61
  -4  10   3    1.53    0.77
   4 -10  -3    2.25    0.63
   4 -10  -3    1.37    0.77
   4 -10  -3    1.86    0.80
   4 -10  -3    1.20    0.58
   5 -10  -3   39.26    2.38
   5 -10  -3   45.03    2.62
  -5  10   3   36.72    2.14
   5 -10  -3   35.05    2.06
   6 -10  -3   22.00    1.98
  -6  10   3   24.38    1.83
   6 -10  -3   23.10    1.90
   7 -10  -3    0.05    0.99
  -7  10   3   -0.13    0.81
   7 -10  -3    0.72    0.97
  -8  10   3    1.41    0.95
   8 -10  -3   -0.37    1.11
   8 -10  -3   -0.38    1.06
   9 -10  -3    3.82    1.43
  -9  10   3    1.92    1.12
   9 -10  -3    1.14    1.28
 -10  10   3    1.09    1.16
  10 -10  -3    0.55    1.38
  10 -10  -3    0.44    1.37
 -11  -9  -3    0.79    1.16
 -10  -9  -3    0.59    1.05
 -10  -9  -3    0.69    1.29
  10   9   3    1.34    1.00
  -9  -9  -3    0.16    0.82
  -9  -9  -3   -0.51    0.87
   9   9   3   -0.51    0.81
  -8  -9  -3    2.16    0.78
   8   9   3    1.70    0.86
  -8  -9  -3    2.21    0.96
  -7  -9  -3    4.31    0.68
   7   9   3    2.82    0.81
  -7  -9  -3    2.87    0.92
  -7  -9  -3    1.81    0.86
  -6  -9  -3    1.42    0.75
  -6  -9  -3    1.66    1.06
   6   9   3    1.46    0.58
   6   9   3    1.64    0.65
  -6  -9  -3    0.89    0.73
   5   9   3    0.45    0.49
  -5  -9  -3   -0.39    0.81
   5   9   3   -0.22    0.40
  -5  -9  -3   -0.05    0.54
  -5  -9  -3   -0.19    0.55
  -4  -9  -3   84.97    3.45
  -4  -9  -3   85.99    3.45
   4   9   3   94.86    4.10
   4   9   3   81.12    3.09
   4   9   3   81.27    3.20
  -3  -9  -3  147.15    5.78
  -3  -9  -3  166.68    5.86
  -3  -9  -3  158.36    5.81
   3   9   3  183.04    6.60
   2   9   3  741.00   25.41
   1   9   3   22.24    1.57
   0   9   3   16.80    1.24
   1  -9  -3    5.14    0.60
  -1   9   3    3.97    0.68
   1  -9  -3    5.63    0.63
  -2   9   3   35.25    1.50
  -2   9   3   28.85    1.55
   2  -9  -3   34.10    1.69
   2  -9  -3   28.42    1.62
  -2   9   3   31.18    1.45
  -3   9   3   11.64    0.87
   3  -9  -3   10.46    1.06
   3  -9  -3   12.51    1.10
  -3   9   3   10.68    1.01
  -3   9   3   11.11    1.04
   4  -9  -3   -2.05    0.63
   4  -9  -3   -0.99    0.64
  -4   9   3   -0.44    0.65
  -4   9   3   -0.77    0.62
   4  -9  -3    0.12    0.63
   4  -9  -3    0.40    0.69
  -5   9   3    8.78    1.18
   5  -9  -3   10.16    1.31
   5  -9  -3   11.90    1.26
   5  -9  -3   12.02    1.30
  -5   9   3   11.05    1.20
  -6   9   3    8.99    1.24
   6  -9  -3    9.24    1.33
   6  -9  -3    9.67    1.32
   7  -9  -3   33.95    2.50
  -7   9   3   31.77    2.19
   7  -9  -3   33.05    2.40
   8  -9  -3    0.20    1.13
  -8   9   3    0.76    0.88
   8  -9  -3    0.24    1.05
   9  -9  -3    1.47    1.23
  -9   9   3    1.13    0.98
   9  -9  -3    1.28    1.29
  10  -9  -3    3.21    1.60
  10  -9  -3    5.06    1.74
 -10   9   3    4.81    1.36
  11  -9  -3    0.06    1.53
  11   8   3   -0.32    0.96
 -11  -8  -3    0.52    1.27
 -11  -8  -3    0.57    1.11
  10   8   3    2.13    1.09
 -10  -8  -3    0.99    1.13
 -10  -8  -3    1.63    1.20
  -9  -8  -3    7.05    1.24
   9   8   3    3.95    1.10
  -9  -8  -3    8.59    1.42
  -8  -8  -3    0.65    0.82
  -8  -8  -3   -0.61    0.75
   8   8   3    0.50    0.74
   7   8   3    5.98    0.98
  -7  -8  -3    5.95    1.09
  -7  -8  -3    6.77    1.09
  -7  -8  -3    6.15    1.39
  -7  -8  -3    7.32    0.95
  -6  -8  -3    0.61    0.65
  -6  -8  -3    0.79    0.68
   6   8   3    0.72    0.58
  -6  -8  -3    1.46    0.54
  -6  -8  -3    1.03    0.52
   6   8   3    1.33    0.54
  -6  -8  -3   -0.22    0.88
  -5  -8  -3   27.16    1.64
   5   8   3   25.87    1.48
  -5  -8  -3   30.41    1.74
   5   8   3   26.95    1.43
  -5  -8  -3   28.56    2.10
  -4  -8  -3   24.95    1.42
   4   8   3   24.25    1.90
   4   8   3   22.30    1.19
  -4  -8  -3   25.76    1.86
   4   8   3   22.69    1.12
  -4  -8  -3   23.35    1.38
  -3  -8  -3   20.61    1.18
  -3  -8  -3   17.90    1.12
   3   8   3   18.54    1.58
   2   8   3  127.26    5.08
   1   8   3  119.00    4.68
   0   8   3   16.82    1.18
  -1   8   3   32.25    1.61
   1  -8  -3   32.42    1.44
   1  -8  -3   31.62    1.44
   2  -8  -3   39.14    1.83
  -2   8   3   41.10    1.80
  -2   8   3   37.59    1.62
   2  -8  -3   40.09    1.84
  -2   8   3   39.51    1.65
  -3   8   3    3.74    0.77
  -3   8   3    3.08    0.64
   3  -8  -3    2.28    0.66
   3  -8  -3    3.93    0.74
  -3   8   3    3.50    0.64
   3  -8  -3    3.42    0.75
   3  -8  -3    2.75    0.65
   4  -8  -3    2.84    0.81
   5  -8  -3   16.65    1.49
  -5   8   3   14.21    1.31
  -5   8   3   15.25    1.42
   5  -8  -3   11.94    1.38
   5  -8  -3   15.95    1.49
   6  -8  -3  164.28    6.74
  -6   8   3  166.42    6.33
   6  -8  -3  167.56    6.62
  -7   8   3    3.48    1.02
   7  -8  -3    2.28    1.10
   7  -8  -3    2.41    1.19
   8  -8  -3    3.00    1.34
   8  -8  -3   -0.01    1.11
  -8   8   3    2.93    1.07
   9  -8  -3    0.46    1.18
   9  -8  -3    0.82    1.07
  -9   8   3    1.19    0.93
  10  -8  -3    2.29    1.56
  10  -8  -3   -1.38    1.14
  11  -8  -3    1.01    1.60
  12   7   3    0.11    1.01
 -12  -7  -3    0.73    1.21
 -12  -7  -3   -0.61    1.22
 -11  -7  -3    3.20    1.35
  11   7   3    3.30    1.29
 -11  -7  -3    4.95    1.50
  10   7   3   -0.56    0.89
 -10  -7  -3   -0.73    1.00
 -10  -7  -3   -0.95    0.96
   9   7   3    2.01    0.91
  -9  -7  -3    1.12    0.98
  -9  -7  -3    2.08    1.03
  -8  -7  -3   24.70    1.92
   8   7   3   24.39    1.85
  -8  -7  -3   22.65    1.96
   7   7   3   32.35    1.84
  -7  -7  -3   30.99    2.06
  -7  -7  -3   28.15    1.98
   7   7   3   26.57    1.82
  -7  -7  -3   29.59    1.89
  -7  -7  -3   30.28    2.39
  -6  -7  -3   19.00    1.48
  -6  -7  -3   17.17    1.74
  -6  -7  -3   18.05    1.29
  -6  -7  -3   16.71    1.42
  -6  -7  -3   18.53    1.34
   6   7   3   15.87    1.25
   6   7   3   16.54    1.29
  -5  -7  -3    1.49    0.83
   5   7   3    2.96    0.52
   5   7   3    2.34    0.54
  -5  -7  -3    2.16    0.53
  -5  -7  -3    2.87    0.67
  -5  -7  -3    2.52    0.50
  -5  -7  -3    1.83    0.60
   5   7   3    1.30    0.79
   4   7   3    3.82    0.45
  -4  -7  -3    2.62    0.87
   4   7   3    1.42    0.83
  -4  -7  -3    2.12    0.56
  -4  -7  -3    3.50    0.62
   4   7   3    2.56    0.48
  -3  -7  -3   17.86    1.08
  -3  -7  -3   20.55    1.13
   3   7   3   22.59    1.59
   2   7   3   60.55    2.79
   1   7   3    9.41    0.95
   0   7   3  137.59    5.14
   1  -7  -3   33.09    1.45
   1  -7  -3   35.17    1.46
  -1   7   3   33.32    1.64
  -2   7   3   76.91    2.73
   2  -7  -3   72.83    2.93
   2  -7  -3   76.84    2.96
   2  -7  -3   69.53    2.75
   2  -7  -3   75.59    2.77
  -2   7   3   71.97    2.72
  -2   7   3   77.05    2.92
   3  -7  -3  221.06    7.63
  -3   7   3  211.33    7.40
   3  -7  -3  225.88    7.76
  -3   7   3  217.58    7.71
   3  -7  -3  214.29    7.75
  -3   7   3  213.84    7.40
   3  -7  -3  209.46    7.61
   4  -7  -3  160.11    6.08
  -4   7   3  164.59    5.89
   4  -7  -3  171.16    6.12
   4  -7  -3  163.44    6.17
   4  -7  -3  166.30    6.10
   4  -7  -3  155.22    6.16
  -4   7   3  162.46    6.15
  -4   7   3  162.46    5.89
   5  -7  -3   11.20    1.28
   5  -7  -3   10.65    1.36
   5  -7  -3    9.49    1.30
  -5   7   3    9.68    1.18
  -5   7   3    9.79    1.33
  -5   7   3    8.90    1.13
   5  -7  -3    9.11    1.03
   6  -7  -3   18.70    1.88
  -6   7   3   19.32    1.85
   6  -7  -3   21.98    1.91
  -6   7   3   19.06    1.74
   6  -7  -3   21.06    2.10
  -7   7   3   35.40    2.33
   7  -7  -3   33.55    2.59
   7  -7  -3   37.11    2.68
  -8   7   3    9.35    1.34
   8  -7  -3    7.73    1.46
   8  -7  -3    6.15    1.42
   9  -7  -3    0.23    1.23
  -9   7   3    0.72    0.93
   9  -7  -3    0.61    1.09
  10  -7  -3   -0.38    1.07
  10  -7  -3   -0.40    1.28
  11  -7  -3   -1.46    1.33
  12  -7  -3    0.06    1.64
 -12  -6  -3   -1.41    1.23
 -12  -6  -3    1.52    1.28
 -11  -6  -3   -0.72    1.05
  11   6   3    0.68    1.04
 -11  -6  -3   -0.47    1.13
 -10  -6  -3    3.88    1.23
  10   6   3    3.50    1.09
 -10  -6  -3    2.56    1.20
  -9  -6  -3    0.31    0.93
  -9  -6  -3    1.46    0.96
   9   6   3    0.43    0.81
  -8  -6  -3    5.10    1.12
  -8  -6  -3    6.88    1.20
  -8  -6  -3    4.28    1.35
   8   6   3    6.73    1.10
  -7  -6  -3   17.88    1.61
  -7  -6  -3   19.02    1.64
  -7  -6  -3   22.48    1.99
   7   6   3   19.92    1.49
  -7  -6  -3   23.19    1.64
   7   6   3   19.80    1.52
   6   6   3   33.76    2.24
  -6  -6  -3   32.07    1.81
  -6  -6  -3   34.29    1.87
   6   6   3   35.95    1.81
  -6  -6  -3   36.90    2.01
   6   6   3   36.48    2.03
  -6  -6  -3   34.89    1.99
   6   6   3   32.29    1.80
  -6  -6  -3   32.83    2.28
   5   6   3   15.74    1.23
  -5  -6  -3   14.93    1.11
   5   6   3   14.68    1.02
  -5  -6  -3   16.04    1.19
  -5  -6  -3   16.94    1.12
  -5  -6  -3   14.33    1.47
   5   6   3   15.35    1.05
  -5  -6  -3   15.60    1.20
   5   6   3   14.11    1.45
   4   6   3   51.75    2.01
  -4  -6  -3   51.10    2.06
   4   6   3   52.20    2.26
   4   6   3   54.19    2.67
  -4  -6  -3   49.24    2.06
  -4  -6  -3   53.20    2.24
   4   6   3   50.71    2.04
  -4  -6  -3   49.60    2.62
  -4  -6  -3   54.62    2.26
   3   6   3    5.21    0.54
   3   6   3    3.75    0.79
  -3  -6  -3    3.97    0.48
  -3  -6  -3    4.23    0.51
   1   6   3   90.35    3.61
   0   6   3   70.22    2.86
   1  -6  -3   99.79    3.58
   1  -6  -3   95.54    3.57
  -1   6   3  104.32    3.60
   2  -6  -3   31.30    1.44
   3  -6  -3    1.31    0.52
   3  -6  -3    2.66    0.58
   3  -6  -3    1.20    0.51
   3  -6  -3    1.96    0.57
  -3   6   3    1.78    0.46
  -3   6   3    1.08    0.47
  -3   6   3    2.22    0.59
   3  -6  -3    1.37    0.52
   4  -6  -3   23.54    1.43
  -4   6   3   22.63    1.32
  -4   6   3   23.41    1.51
   4  -6  -3   14.93    1.23
  -4   6   3   23.10    1.40
   4  -6  -3   20.39    1.47
   4  -6  -3   16.16    1.34
   4  -6  -3   18.94    1.46
   5  -6  -3  154.95    5.77
  -5   6   3  144.41    5.77
  -5   6   3  154.21    5.57
   5  -6  -3  141.28    5.72
  -5   6   3  143.00    5.44
   5  -6  -3  140.46    5.76
   5  -6  -3  150.93    5.78
  -6   6   3    6.41    1.04
   6  -6  -3    6.39    1.12
   6  -6  -3    5.97    1.19
   6  -6  -3    6.77    1.24
  -6   6   3    7.02    1.13
  -6   6   3    5.84    1.25
   7  -6  -3   22.57    2.11
  -7   6   3   23.81    2.23
   7  -6  -3   21.14    2.05
  -7   6   3   19.83    1.69
   8  -6  -3    1.00    1.02
  -8   6   3    2.30    0.91
  -8   6   3    0.97    0.81
   8  -6  -3    1.62    1.03
   9  -6  -3    0.24    1.01
  -9   6   3    1.59    0.89
   9  -6  -3    1.07    1.16
  10  -6  -3    6.10    1.57
  11  -6  -3    6.13    1.75
  12  -6  -3   -0.57    1.59
 -13  -5  -3    3.59    1.70
 -12  -5  -3    8.57    1.76
 -12  -5  -3    7.44    1.72
 -11  -5  -3    1.52    1.18
 -11  -5  -3    3.54    1.38
  11   5   3    3.03    1.21
 -10  -5  -3   -1.02    0.84
 -10  -5  -3   -0.30    1.04
  10   5   3   -1.36    0.78
  -9  -5  -3   12.05    1.55
  -9  -5  -3   13.17    1.61
  -9  -5  -3   11.73    1.75
   9   5   3   11.19    1.41
  -8  -5  -3    2.58    0.96
  -8  -5  -3    3.74    1.04
   8   5   3    1.60    0.79
  -8  -5  -3    1.64    1.02
  -7  -5  -3  108.81    4.64
   7   5   3  111.74    4.44
  -7  -5  -3  104.75    4.51
  -7  -5  -3  110.92    4.67
   7   5   3  110.73    4.35
   7   5   3  109.52    4.66
  -7  -5  -3  109.54    4.95
  -6  -5  -3   55.97    2.71
  -6  -5  -3   57.53    2.65
  -6  -5  -3   56.93    3.02
  -6  -5  -3   57.81    2.67
   6   5   3   60.21    2.81
   6   5   3   57.31    3.00
  -6  -5  -3   57.10    2.73
   6   5   3   57.73    2.52
   6   5   3   56.64    2.54
  -5  -5  -3   26.64    1.83
   5   5   3   29.12    1.45
   5   5   3   27.86    1.62
   5   5   3   26.71    1.44
   5   5   3   28.83    1.85
  -5  -5  -3   28.54    1.61
  -5  -5  -3   26.18    1.59
  -5  -5  -3   27.05    1.53
  -5  -5  -3   27.11    1.51
   4   5   3   71.34    2.70
  -4  -5  -3   69.68    2.79
  -4  -5  -3   74.37    3.29
  -4  -5  -3   73.28    2.80
   4   5   3   72.07    2.67
   4   5   3   72.47    2.92
   4   5   3   73.93    3.27
  -4  -5  -3   71.47    2.91
  -4  -5  -3   71.28    2.91
   3   5   3   12.62    1.09
  -3  -5  -3   10.42    1.05
  -3  -5  -3   10.99    0.75
   3   5   3    9.94    0.57
  -3  -5  -3    9.67    0.76
   3   5   3    9.51    0.55
   3   5   3   10.38    0.82
  -3  -5  -3    9.02    0.66
  -3  -5  -3    9.62    0.67
   2   5   3   20.00    1.31
   2   5   3   20.40    0.94
   1   5   3   75.69    3.06
   1  -5  -3   14.45    0.77
   1  -5  -3   16.02    0.82
  -1   5   3   14.70    0.87
   1  -5  -3   16.19    0.79
   1  -5  -3   15.55    0.81
   2  -5  -3   51.48    2.11
   3  -5  -3    0.94    0.46
   3  -5  -3    1.29    0.44
  -3   5   3    0.65    0.40
   3  -5  -3    0.61    0.44
  -3   5   3    1.42    0.40
   3  -5  -3    0.24    0.39
   3  -5  -3    0.22    0.41
  -3   5   3    0.80    0.44
   4  -5  -3   80.87    3.37
   4  -5  -3   79.75    3.33
  -4   5   3   77.89    3.15
   4  -5  -3   78.32    3.31
  -4   5   3   77.48    3.33
   4  -5  -3   73.12    3.28
  -4   5   3   80.21    3.10
   4  -5  -3   77.69    3.31
   5  -5  -3   16.55    1.41
   5  -5  -3   18.57    1.41
  -5   5   3   16.19    1.26
  -5   5   3   15.88    1.29
   5  -5  -3   19.05    1.42
  -5   5   3   16.73    1.40
   5  -5  -3   16.53    1.49
  -6   5   3    0.47    0.62
   6  -5  -3    0.62    0.77
  -6   5   3    0.43    0.58
  -6   5   3   -0.17    0.71
   6  -5  -3    0.82    0.63
  -6   5   3    0.69    0.59
   6  -5  -3    0.80    0.66
   6  -5  -3    1.01    0.83
  -7   5   3   29.23    2.22
   7  -5  -3   32.55    2.24
   7  -5  -3   31.62    2.28
  -7   5   3   32.22    1.98
   8  -5  -3   -0.30    0.95
  -8   5   3   -0.78    0.92
   8  -5  -3   -0.34    0.88
  -8   5   3   -0.15    0.74
  -8   5   3    0.62    0.72
   9  -5  -3    1.90    1.24
  -9   5   3    1.79    0.88
   9  -5  -3    3.22    1.18
  -9   5   3    2.26    0.96
  -9   5   3    3.43    1.28
  10  -5  -3   -0.14    1.19
  11  -5  -3    4.11    1.62
  12  -5  -3    8.98    2.16
 -13  -4  -3    0.12    1.39
 -12  -4  -3    0.71    1.32
  11   4   3    2.14    1.12
 -11  -4  -3    3.56    1.30
 -11  -4  -3   -0.79    1.05
 -10  -4  -3    1.51    1.08
 -10  -4  -3    0.77    1.07
  10   4   3    1.39    0.90
   9   4   3    7.17    1.18
  -9  -4  -3    6.25    1.26
  -9  -4  -3    3.07    1.13
  -9  -4  -3    7.10    1.30
  -8  -4  -3    4.70    1.22
  -8  -4  -3    5.03    1.12
   8   4   3    5.32    1.14
  -8  -4  -3    7.21    1.20
   8   4   3    5.84    1.03
  -7  -4  -3    1.71    0.85
   7   4   3    1.99    0.73
   7   4   3    2.80    0.93
   7   4   3    1.89    0.76
  -7  -4  -3    2.55    1.00
  -7  -4  -3    2.23    0.82
  -7  -4  -3    1.64    0.88
   7   4   3    2.94    0.88
  -7  -4  -3    2.64    0.84
   6   4   3   50.65    2.35
  -6  -4  -3   51.61    2.53
  -6  -4  -3   52.92    2.79
   6   4   3   54.22    2.75
  -6  -4  -3   53.57    2.58
   6   4   3   50.78    2.38
  -6  -4  -3   53.41    2.64
   6   4   3   51.23    2.60
  -5  -4  -3   14.13    1.32
   5   4   3   14.08    1.31
  -5  -4  -3   14.28    1.21
  -5  -4  -3   13.33    1.15
   5   4   3   15.76    1.32
  -5  -4  -3   15.06    1.22
   5   4   3   12.75    1.04
   5   4   3   16.41    1.07
   4   4   3  325.81   10.71
   4   4   3  323.10   10.73
  -4  -4  -3  331.36   11.09
  -4  -4  -3  309.54   11.05
  -4  -4  -3  316.01   11.15
   4   4   3  331.32   11.18
  -4  -4  -3  315.76   11.52
  -4  -4  -3  333.19   11.19
   4   4   3  328.98   11.53
  -3  -4  -3    0.86    0.34
  -3  -4  -3    2.08    0.39
  -3  -4  -3    0.32    0.31
   3   4   3    0.94    0.26
   3   4   3    0.86    0.25
   3   4   3    1.53    0.39
  -3  -4  -3    0.44    0.31
   3   4   3    1.54    0.49
  -2  -4  -3   33.71    1.30
  -2  -4  -3   31.95    1.31
   2   4   3   33.48    1.68
   2   4   3   33.53    1.42
  -2  -4  -3   38.18    1.38
   1   4   3   45.31    1.69
   0  -4  -3   40.10    1.55
   0   4   3   41.97    1.61
   0  -4  -3   43.41    1.57
   1  -4  -3 1070.57   36.09
  -1   4   3 1037.22   35.09
   1  -4  -3 1079.81   36.21
   1  -4  -3 1066.61   36.02
  -1   4   3 1103.18   36.05
  -1   4   3 1138.53   35.18
   1  -4  -3 1121.31   36.19
  -2   4   3  352.85   11.61
   2  -4  -3  300.68   11.93
   2  -4  -3  350.44   12.03
  -2   4   3  368.22   11.60
  -2   4   3  368.91   12.05
   2  -4  -3  370.78   12.06
   2  -4  -3  357.69   12.00
   3  -4  -3  275.18    9.64
  -3   4   3  268.26    9.29
  -3   4   3  274.44    9.55
   3  -4  -3  273.38    9.63
  -3   4   3  281.90    9.28
  -3   4   3  284.57    9.70
   3  -4  -3  272.32    9.67
   3  -4  -3  268.85    9.63
   3  -4  -3  286.12    9.67
   4  -4  -3    0.24    0.50
  -4   4   3   -0.48    0.38
  -4   4   3   -0.56    0.47
   4  -4  -3   -0.52    0.47
   4  -4  -3   -0.28    0.35
   4  -4  -3    0.06    0.43
  -4   4   3   -0.24    0.41
  -4   4   3    0.19    0.42
   4  -4  -3    0.26    0.36
   4  -4  -3   -0.74    0.47
   4  -4  -3    0.38    0.48
  -5   4   3    9.68    1.09
   5  -4  -3    8.69    0.88
   5  -4  -3   10.34    1.04
   5  -4  -3    8.83    1.03
  -5   4   3    7.71    0.92
   5  -4  -3    6.82    1.00
   5  -4  -3    7.92    1.00
  -5   4   3    9.56    0.95
  -5   4   3   10.23    0.99
   6  -4  -3   95.01    4.23
  -6   4   3   93.44    3.90
   6  -4  -3   94.78    4.22
  -6   4   3   94.81    4.23
   6  -4  -3   99.78    4.26
  -6   4   3   98.35    4.06
   6  -4  -3   99.99    3.91
  -6   4   3   98.46    4.14
  -7   4   3    8.50    1.08
   7  -4  -3   10.06    1.32
  -7   4   3    6.71    1.21
   7  -4  -3    7.64    1.26
  -8   4   3   -0.44    0.85
   8  -4  -3   -0.20    0.97
  -8   4   3    0.73    0.73
   8  -4  -3   -0.37    0.88
   9  -4  -3   32.98    2.69
  -9   4   3   35.51    2.29
  -9   4   3   32.87    2.35
  -9   4   3   32.66    2.84
   9  -4  -3   33.52    2.65
  10  -4  -3   17.20    2.11
 -10   4   3   15.78    1.81
 -10   4   3   13.55    1.95
 -11   4   3   -0.03    1.27
  11  -4  -3    1.80    1.39
  12  -4  -3    7.55    2.11
 -13  -3  -3   -1.58    1.22
 -12  -3  -3    9.78    1.79
 -11  -3  -3    0.81    1.03
 -11  -3  -3    0.43    1.16
  11   3   3    0.15    0.94
 -10  -3  -3   -0.50    0.91
  10   3   3    1.57    0.95
 -10  -3  -3    1.01    1.09
 -10  -3  -3    2.01    1.09
   9   3   3    2.66    0.97
  -9  -3  -3    3.45    1.20
   9   3   3    2.84    1.12
  -9  -3  -3    2.72    1.10
  -9  -3  -3    2.80    1.06
  -8  -3  -3    0.48    0.87
   8   3   3   -0.14    0.88
  -8  -3  -3    0.38    0.56
  -8  -3  -3    2.31    1.01
   8   3   3   -0.14    0.68
  -8  -3  -3    0.27    0.85
  -7  -3  -3   27.76    1.93
   7   3   3   30.68    1.81
  -7  -3  -3   28.94    1.95
  -7  -3  -3   27.20    1.84
  -7  -3  -3   31.34    2.01
   7   3   3   29.36    1.97
  -7  -3  -3   30.49    2.05
   7   3   3   26.22    1.76
   7   3   3   29.88    1.82
   7   3   3   29.33    2.04
  -6  -3  -3   73.35    3.33
  -6  -3  -3   75.57    3.50
   6   3   3   75.60    3.24
   6   3   3   74.67    3.47
  -6  -3  -3   79.37    3.35
   6   3   3   73.75    3.16
   6   3   3   77.50    3.16
  -6  -3  -3   78.19    3.38
  -6  -3  -3   80.30    3.40
   6   3   3   75.97    3.41
   5   3   3 1276.84   42.35
   5   3   3 1260.55   41.84
  -5  -3  -3 1336.60   42.03
  -5  -3  -3 1210.03   41.77
   5   3   3 1226.68   40.57
   5   3   3 1254.01   41.85
  -5  -3  -3 1305.80   41.80
   5   3   3 1269.78   40.56
  -5  -3  -3 1231.40   41.95
  -5  -3  -3 1188.90   42.31
  -4  -3  -3    8.89    0.97
  -4  -3  -3    8.74    0.82
  -4  -3  -3    7.85    0.81
  -4  -3  -3    7.63    0.78
   4   3   3    8.24    0.70
   4   3   3    8.76    0.74
   4   3   3    9.36    0.94
   4   3   3    8.46    0.77
   4   3   3    7.62    0.84
  -3  -3  -3    1.71    0.39
   3   3   3    2.53    0.47
   3   3   3    2.03    0.33
  -3  -3  -3    1.92    0.40
  -3  -3  -3    2.03    0.38
   3   3   3    2.99    0.35
   3   3   3    2.40    0.34
  -3  -3  -3    3.37    0.45
   3   3   3    1.75    0.49
  -2  -3  -3  288.06    9.75
   2   3   3  289.21   10.02
   2   3   3  292.13    9.73
  -2  -3  -3  267.85    9.66
   2   3   3  289.33    9.39
   2   3   3  289.24    9.39
  -2  -3  -3  289.94    9.71
  -2  -3  -3  291.55    9.74
  -1  -3  -3 1160.35   39.20
  -1  -3  -3 1203.11   39.30
   1   3   3 1170.95   39.05
  -1  -3  -3 1178.50   39.11
  -1  -3  -3 1182.45   39.36
   0  -3  -3    7.57    0.51
   0  -3  -3    8.99    0.52
   0   3   3    7.76    0.41
   0   3   3    8.41    0.58
   0   3   3    7.33    0.41
   0  -3  -3    7.83    0.50
   0  -3  -3    8.64    0.55
   0   3   3    7.85    0.42
   1  -3  -3  204.83    7.20
   1  -3  -3  213.90    7.22
  -1   3   3  215.59    6.94
  -1   3   3  211.43    7.15
  -1   3   3  203.32    6.93
   1  -3  -3  203.29    7.18
  -1   3   3  210.85    7.22
   2  -3  -3    5.59    0.62
  -2   3   3    6.88    0.59
  -2   3   3    6.99    0.61
   2  -3  -3    6.05    0.66
   2  -3  -3    5.57    0.54
   2  -3  -3    5.48    0.60
  -2   3   3    6.85    0.73
  -2   3   3    5.45    0.62
   2  -3  -3    5.48    0.66
  -3   3   3  123.28    4.57
   3  -3  -3  138.20    4.83
   3  -3  -3  132.34    4.84
  -3   3   3  129.88    4.73
  -3   3   3  130.10    4.55
   3  -3  -3  123.82    4.77
   3  -3  -3  122.61    4.75
   3  -3  -3  126.78    4.51
  -3   3   3  124.63    4.81
   4  -3  -3  555.68   19.44
  -4   3   3  563.44   19.46
   4  -3  -3  591.11   19.44
   4  -3  -3  550.82   19.39
  -4   3   3  574.84   18.76
   4  -3  -3  570.50   18.73
  -4   3   3  566.10   19.38
  -4   3   3  565.76   18.80
   4  -3  -3  591.05   19.47
   5  -3  -3   25.31    1.76
   5  -3  -3   28.71    1.59
   5  -3  -3   24.96    1.71
  -5   3   3   30.38    1.75
  -5   3   3   27.82    1.65
  -5   3   3   29.07    1.79
  -5   3   3   28.02    1.58
   5  -3  -3   26.47    1.74
   6  -3  -3    2.11    0.65
   6  -3  -3    2.65    0.83
  -6   3   3    2.19    0.69
  -6   3   3    2.10    0.67
  -6   3   3    1.30    0.60
  -6   3   3    2.47    0.81
   6  -3  -3    1.80    0.66
   6  -3  -3    2.77    0.81
  -7   3   3   -0.70    0.75
   7  -3  -3   -0.87    0.59
  -7   3   3    0.00    0.60
   7  -3  -3    0.06    0.71
  -7   3   3    0.63    0.71
   7  -3  -3   -0.43    0.72
  -8   3   3   -0.77    0.88
   8  -3  -3   -0.93    0.83
  -8   3   3   -0.68    0.66
   8  -3  -3   -0.96    0.86
   9  -3  -3   88.38    4.72
  -9   3   3   98.85    4.83
  -9   3   3   94.93    4.50
  10  -3  -3    3.97    1.46
 -10   3   3    1.12    1.29
 -10   3   3    2.78    1.04
 -11   3   3    2.24    1.45
  11  -3  -3    3.19    1.61
 -12   3   3    2.67    1.62
  12  -3  -3    2.67    1.75
 -13  -2  -3   -0.21    1.42
 -12  -2  -3    6.33    1.70
 -11  -2  -3    1.13    1.33
 -11  -2  -3    4.51    1.48
  10   2   3    6.97    1.31
 -10  -2  -3    8.12    1.49
 -10  -2  -3    5.85    1.41
 -10  -2  -3    5.57    1.45
  10   2   3    9.13    1.67
   9   2   3    9.69    1.46
  -9  -2  -3   10.45    1.67
  -9  -2  -3   16.48    1.76
  -9  -2  -3   11.72    1.66
   9   2   3   13.23    1.87
  -8  -2  -3  118.82    5.07
  -8  -2  -3  118.10    5.05
  -8  -2  -3  115.68    5.10
   8   2   3  114.53    4.78
   8   2   3  122.02    5.06
   8   2   3  116.67    5.15
  -8  -2  -3  114.73    4.48
  -8  -2  -3  113.12    5.01
   7   2   3    1.13    0.59
   7   2   3    0.81    0.59
   7   2   3   -0.25    0.69
  -7  -2  -3    1.13    0.69
  -7  -2  -3    0.69    0.54
   7   2   3    1.08    0.62
  -7  -2  -3    0.95    0.50
  -7  -2  -3    0.83    0.72
   7   2   3    0.94    0.69
  -7  -2  -3   -0.21    0.67
   6   2   3  139.59    5.54
  -6  -2  -3  133.89    5.42
  -6  -2  -3  139.86    5.57
  -6  -2  -3  132.87    5.40
   6   2   3  143.47    5.54
  -6  -2  -3  147.69    5.48
   6   2   3  145.14    5.22
   6   2   3  136.76    5.20
   6   2   3  140.95    5.38
  -6  -2  -3  137.68    5.00
   5   2   3    6.88    0.91
   5   2   3    6.83    0.75
   5   2   3    8.12    0.80
  -5  -2  -3    7.92    0.94
   5   2   3    8.28    0.94
   5   2   3    7.13    0.80
  -5  -2  -3    5.50    0.79
  -5  -2  -3    8.04    0.69
  -5  -2  -3    6.65    0.86
  -5  -2  -3    6.38    0.86
  -5  -2  -3    6.82    0.85
  -4  -2  -3  105.46    3.99
   4   2   3  101.71    3.77
  -4  -2  -3  100.54    3.94
  -4  -2  -3  106.74    4.00
   4   2   3  103.00    3.77
   4   2   3  109.43    4.13
  -4  -2  -3  107.30    3.99
  -4  -2  -3  103.00    4.09
  -4  -2  -3  101.95    3.65
   4   2   3  100.25    3.90
   4   2   3  102.80    4.03
  -3  -2  -3  689.84   22.30
   3   2   3  680.89   22.37
  -3  -2  -3  705.87   23.17
  -3  -2  -3  677.70   23.14
  -3  -2  -3  689.01   23.08
   3   2   3  672.34   23.08
  -3  -2  -3  696.14   23.08
   3   2   3  702.16   23.12
   3   2   3  691.05   23.38
   3   2   3  703.96   22.39
   2   2   3  509.56   16.89
   2   2   3  504.59   16.33
  -2  -2  -3  503.43   16.85
   2   2   3  493.64   16.85
   2   2   3  508.85   16.34
  -2  -2  -3  507.68   16.30
  -2  -2  -3  509.13   16.91
  -2  -2  -3  490.83   16.90
  -1  -2  -3 1584.71   51.93
   1   2   3 1574.36   50.36
   1   2   3 1518.84   51.90
  -1  -2  -3 1544.87   51.96
   1   2   3 1599.69   50.39
  -1  -2  -3 1565.71   50.67
   1   2   3 1525.03   51.73
  -1  -2  -3 1630.85   50.60
  -1  -2  -3 1538.81   51.76
   1   2   3 1580.17   51.88
   0  -2  -3  114.82    3.78
   0  -2  -3  110.12    3.97
   0  -2  -3  109.81    3.98
   0  -2  -3  110.83    3.75
   0  -2  -3  112.91    3.98
   0   2   3  111.43    3.82
   0   2   3  114.19    3.95
   0   2   3  114.39    4.01
   0   2   3  112.78    3.81
   0   2   3  113.07    3.94
  -1   2   3   98.49    3.60
   1  -2  -3   93.14    3.35
   1  -2  -3   97.85    3.55
  -1   2   3   97.20    3.52
   1  -2  -3   98.14    3.58
   1  -2  -3   97.09    3.56
  -1   2   3   94.19    3.41
   1  -2  -3  100.99    3.34
  -1   2   3   99.75    3.39
   1  -2  -3   95.29    3.54
   2  -2  -3    3.52    0.48
  -2   2   3    1.73    0.34
   2  -2  -3    2.72    0.42
  -2   2   3    2.98    0.42
   3  -2  -3 1585.28   50.42
  -3   2   3 1644.70   50.46
   3  -2  -3 1592.39   51.95
  -3   2   3 1602.60   51.98
  -3   2   3 1633.19   52.09
   3  -2  -3 1564.48   52.09
   3  -2  -3 1358.95   52.00
   3  -2  -3 1695.37   51.98
   3  -2  -3 1577.62   50.41
   3  -2  -3 1326.57   51.98
  -3   2   3 1657.64   50.43
   4  -2  -3  234.84    8.71
  -4   2   3  239.83    8.34
   4  -2  -3  237.69    8.72
   4  -2  -3  249.98    8.74
  -4   2   3  249.83    8.81
  -4   2   3  238.55    8.70
   4  -2  -3  251.09    8.76
  -5   2   3   14.53    1.20
   5  -2  -3   13.86    1.22
  -5   2   3   14.89    1.22
   5  -2  -3   13.51    1.25
   5  -2  -3   14.24    1.31
  -5   2   3   13.55    1.08
  -5   2   3   12.68    1.27
   5  -2  -3   13.72    1.24
   6  -2  -3   12.88    1.31
   6  -2  -3   13.53    1.37
   6  -2  -3   12.23    1.21
  -6   2   3   12.82    1.17
   6  -2  -3   17.13    1.34
  -6   2   3   16.65    1.52
  -6   2   3   15.87    1.57
   6  -2  -3   13.24    1.37
  -7   2   3   18.38    1.48
   7  -2  -3   21.07    1.77
  -7   2   3   21.48    1.80
   7  -2  -3   18.64    1.54
  -7   2   3   20.15    1.78
   7  -2  -3   20.58    1.84
  -8   2   3    1.72    0.79
  -8   2   3    2.29    0.98
   8  -2  -3    1.45    0.88
  -8   2   3    0.46    1.02
   8  -2  -3    1.59    1.03
  -9   2   3    8.55    1.44
   9  -2  -3    7.80    1.57
  -9   2   3    6.21    1.47
 -10   2   3    0.35    1.13
 -10   2   3   -1.07    0.78
  10  -2  -3   -0.44    1.08
 -11   2   3    2.99    1.46
  11  -2  -3    2.00    1.49
  12  -2  -3    4.09    1.88
 -12   2   3    4.33    1.68
  13  -2  -3    0.93    1.81
 -14  -1  -3   -1.31    1.55
 -13  -1  -3   17.88    2.44
 -12  -1  -3    4.66    1.62
 -11  -1  -3   26.52    2.30
 -11  -1  -3   20.69    2.33
  11   1   3   22.66    2.53
  10   1   3   50.49    3.02
  10   1   3   50.59    3.49
 -10  -1  -3   50.18    3.27
 -10  -1  -3   52.72    3.15
 -10  -1  -3   48.16    3.20
   9   1   3   -0.48    0.78
  -9  -1  -3   -2.11    0.91
   9   1   3   -2.50    0.96
  -9  -1  -3    0.28    0.90
  -9  -1  -3   -2.62    0.80
  -8  -1  -3   -0.85    0.76
   8   1   3   -2.85    0.90
  -8  -1  -3   -2.24    0.87
  -8  -1  -3   -1.30    0.60
   8   1   3   -1.95    0.73
   8   1   3   -1.29    0.73
  -8  -1  -3   -2.15    0.76
   8   1   3    0.95    0.66
  -7  -1  -3    0.18    0.50
   7   1   3   -0.14    0.76
  -7  -1  -3    0.36    0.67
   7   1   3   -0.90    0.60
  -7  -1  -3    0.27    0.67
   7   1   3    0.69    0.62
  -7  -1  -3    0.17    0.57
   7   1   3   -0.07    0.55
   7   1   3    0.52    0.65
  -7  -1  -3    0.08    0.74
   6   1   3  130.25    5.21
   6   1   3  127.40    5.14
  -6  -1  -3  137.31    5.26
   6   1   3  135.85    5.34
   6   1   3  136.59    5.00
  -6  -1  -3  137.28    5.26
  -6  -1  -3  127.56    5.21
  -6  -1  -3  132.61    4.85
   6   1   3  131.21    4.98
  -6  -1  -3  130.76    5.21
   5   1   3    9.56    0.89
  -5  -1  -3   10.32    1.04
  -5  -1  -3    9.27    0.89
  -5  -1  -3   10.21    1.00
   5   1   3    9.96    0.95
  -5  -1  -3   10.11    1.01
   5   1   3    9.84    0.99
   5   1   3    9.68    1.06
  -5  -1  -3    9.98    1.03
   5   1   3   10.88    0.98
  -5  -1  -3   11.20    1.02
  -4  -1  -3   13.78    0.98
   4   1   3   16.31    1.05
   4   1   3   14.70    1.12
  -4  -1  -3   17.05    1.14
  -4  -1  -3   12.82    1.13
   4   1   3   16.62    1.28
   4   1   3   17.19    1.17
   4   1   3   15.28    1.05
  -4  -1  -3   16.33    1.19
   3   1   3  538.06   18.37
  -3  -1  -3  559.86   18.37
  -3  -1  -3  533.56   18.38
  -3  -1  -3  537.44   18.33
  -3  -1  -3  556.02   17.71
   3   1   3  545.45   18.51
   3   1   3  531.66   18.35
   3   1   3  548.95   17.77
   3   1   3  548.66   17.77
  -3  -1  -3  545.75   17.73
  -2  -1  -3  357.15   12.85
   2   1   3  426.10   13.39
   2   1   3  408.50   13.34
  -2  -1  -3  375.13   13.29
   2   1   3  477.80   13.40
  -2  -1  -3  349.18   13.31
   2   1   3  355.50   12.87
  -2  -1  -3  409.74   13.35
   1   1   3  167.85    5.57
   1   1   3  157.83    5.57
  -1  -1  -3  164.27    5.56
  -1  -1  -3  171.89    5.55
  -1  -1  -3  165.40    5.79
   1   1   3  176.48    5.79
  -1  -1  -3  162.58    5.76
   1   1   3  160.15    5.77
   1   1   3  161.77    5.81
  -1  -1  -3  168.85    5.82
   1   1   3  170.30    5.78
   0  -1  -3 6088.39  208.29
   0   1   3 6282.13  208.80
   0  -1  -3 6515.13  207.95
   0   1   3 6507.82  208.32
   0  -1  -3 6207.75  209.05
   0   1   3 6230.74  209.15
   0   1   3 6276.55  208.54
   0   1   3 6286.89  202.74
   0   1   3 6242.62  202.76
   0  -1  -3 6497.02  202.69
  -1   1   3   81.90    3.03
  -1   1   3   82.46    3.02
   1  -1  -3   80.41    3.04
   1  -1  -3   79.23    3.06
  -1   1   3   79.67    3.01
  -1   1   3   79.06    2.92
  -1   1   3   77.39    3.06
   1  -1  -3   77.98    3.01
   1  -1  -3   82.83    2.86
  -1   1   3   79.83    2.87
  -2   1   3   95.22    3.30
  -2   1   3   81.57    3.17
   2  -1  -3   93.53    3.45
  -2   1   3   90.03    3.46
  -2   1   3   91.45    3.46
  -2   1   3   88.36    3.37
   2  -1  -3   89.82    3.19
   2  -1  -3   83.58    3.36
  -2   1   3   88.82    3.37
  -2   1   3   89.26    3.37
   2  -1  -3   81.97    3.34
   2  -1  -3   84.14    3.36
  -3   1   3   54.11    2.50
   3  -1  -3   55.19    2.42
  -3   1   3   58.42    2.45
  -3   1   3   55.62    2.43
   3  -1  -3   57.42    2.27
   3  -1  -3   54.28    2.31
   3  -1  -3   54.13    2.46
  -3   1   3   54.33    2.25
   3  -1  -3   54.07    2.42
  -3   1   3   56.17    2.35
  -4   1   3  665.31   21.45
  -4   1   3  641.83   22.22
  -4   1   3  674.34   21.54
   4  -1  -3  642.24   22.25
   4  -1  -3  639.04   22.19
   4  -1  -3  692.43   22.28
  -4   1   3  642.21   22.25
   4  -1  -3  636.31   21.50
   5  -1  -3   28.45    1.70
   5  -1  -3   25.52    1.73
   5  -1  -3   27.14    1.79
  -5   1   3   28.48    1.64
   5  -1  -3   27.88    1.64
  -5   1   3   28.47    1.56
  -5   1   3   27.04    1.81
  -5   1   3   27.99    1.71
   5  -1  -3   28.22    1.76
  -6   1   3    0.78    0.55
  -6   1   3    1.39    0.66
  -6   1   3    0.62    0.74
   6  -1  -3    1.62    0.80
   6  -1  -3    0.72    0.60
   6  -1  -3    0.20    0.61
  -7   1   3   10.16    1.26
   7  -1  -3   10.34    1.40
  -7   1   3    8.41    1.33
   7  -1  -3    8.83    1.16
   7  -1  -3    9.70    1.30
  -7   1   3   11.00    1.16
  -8   1   3    1.68    1.00
  -8   1   3    3.28    1.01
   8  -1  -3    1.06    0.89
   8  -1  -3    1.56    0.81
  -8   1   3    1.56    0.96
   8  -1  -3    1.24    0.98
  -9   1   3   -1.77    0.73
  -9   1   3   -0.02    1.03
   9  -1  -3    0.26    1.04
  10  -1  -3   -0.31    1.13
 -10   1   3   -0.59    1.03
 -11   1   3    3.47    1.55
  11  -1  -3    3.69    1.60
 -12   1   3    0.38    1.40
  12  -1  -3    1.78    1.71
 -14   0  -3    5.05    1.90
 -13   0  -3   13.91    2.30
  12   0   3   13.97    2.33
 -12   0  -3   10.55    1.98
 -11   0  -3    1.82    1.10
  11   0   3   -0.39    1.34
 -11   0  -3   -1.54    1.05
 -10   0  -3   12.92    1.85
 -10   0  -3   13.67    1.78
  10   0   3   12.55    2.02
 -10   0  -3   12.39    1.80
   9   0   3   17.05    1.67
  -9   0  -3   16.15    1.84
  -9   0  -3   20.31    2.03
  -9   0  -3   22.27    1.87
   9   0   3   20.08    2.09
   8   0   3    6.41    1.05
   8   0   3    8.50    1.20
   8   0   3    6.97    1.34
  -8   0  -3    7.13    1.20
  -8   0  -3    6.25    1.20
  -8   0  -3    8.26    1.17
   7   0   3    4.36    0.81
  -7   0  -3    5.70    1.00
   7   0   3    5.05    0.81
  -7   0  -3    4.75    0.87
  -7   0  -3    2.21    0.60
   7   0   3    5.04    1.04
  -7   0  -3    4.44    0.80
  -7   0  -3    4.52    0.89
   7   0   3    4.31    0.75
   7   0   3    4.54    0.88
  -6   0  -3    6.00    0.87
  -6   0  -3    5.30    0.73
  -6   0  -3    5.27    0.86
   6   0   3    5.40    0.82
  -6   0  -3    5.70    0.84
   6   0   3    5.57    1.00
   6   0   3    6.77    0.85
  -6   0  -3    6.51    0.94
   6   0   3    5.44    0.81
   6   0   3    6.95    0.91
  -5   0  -3  193.22    6.98
   5   0   3  195.11    7.00
  -5   0  -3  185.78    6.68
   5   0   3  188.46    7.12
  -5   0  -3  187.31    7.02
   5   0   3  198.45    6.79
  -5   0  -3  187.78    7.02
   5   0   3  188.95    7.04
  -5   0  -3  198.77    7.10
   5   0   3  191.42    6.76
  -4   0  -3    3.63    0.61
   4   0   3    3.37    0.54
   4   0   3    3.68    0.55
   4   0   3    4.88    0.59
  -4   0  -3    4.36    0.54
  -4   0  -3    3.36    0.52
  -4   0  -3    4.40    0.70
  -4   0  -3    2.76    0.56
   4   0   3    4.01    0.69
   4   0   3    4.54    0.63
   4   0   3    3.88    0.60
   3   0   3  311.12   10.75
  -3   0  -3  318.25   10.29
   3   0   3  303.13   10.68
  -3   0  -3  308.23   10.70
   3   0   3  322.12   10.35
  -3   0  -3  306.16   10.68
   3   0   3  302.76   10.30
  -3   0  -3  305.13   10.69
  -3   0  -3  296.74   10.29
   3   0   3  306.31   10.70
   3   0   3  315.59   10.69
  -3   0  -3  320.78   10.74
  -2   0  -3   37.59    1.72
   2   0   3   41.33    1.67
   1   0   3  165.91    5.79
  -1   0  -3  166.74    5.82
   1   0   3  168.05    6.08
  -1   0  -3  170.51    6.04
   1   0   3  177.16    6.06
  -1   0  -3  179.16    6.10
  -1   0  -3  172.95    6.05
   1   0   3  166.46    6.04
  -1   0  -3  174.58    6.04
  -1   0  -3  177.30    5.81
   1   0   3  176.09    6.02
   1   0   3  174.02    5.85
   0   0   3  307.17   10.19
   0   0  -3  307.91   10.25
   0   0   3  291.59    9.84
   0   0   3  300.01   10.22
   0   0  -3  294.64    9.88
   0   0  -3  289.57   10.21
   0   0   3  296.47   10.23
   0   0   3  305.86    9.90
   0   0  -3  308.22   10.24
   0   0   3  297.62   10.21
   0   0  -3  291.96   10.18
   0   0  -3  296.97    9.83
  -1   0   3   72.19    2.90
  -1   0   3   79.15    2.92
  -1   0   3   79.72    2.83
  -1   0   3   77.37    2.92
  -1   0   3   77.44    2.82
   1   0  -3   77.08    2.94
   1   0  -3   72.95    2.91
   1   0  -3   78.45    2.77
  -1   0   3   74.07    2.76
   1   0  -3   73.47    2.91
   1   0  -3   72.48    2.94
   1   0  -3   76.68    2.82
  -1   0   3   69.85    2.94
   2   0  -3 1040.30   32.84
  -2   0   3 1057.60   33.88
  -2   0   3 1039.87   33.99
  -2   0   3 1002.33   32.83
   2   0  -3  986.76   33.96
  -2   0   3  994.49   33.97
  -2   0   3  987.42   33.91
   2   0  -3 1001.70   33.87
   2   0  -3 1009.06   32.91
  -2   0   3 1060.81   32.94
   2   0  -3 1002.47   32.92
   2   0  -3 1028.09   33.97
  -3   0   3   12.00    0.90
   3   0  -3   12.85    0.92
   3   0  -3   11.72    0.95
   3   0  -3   12.93    0.99
   3   0  -3   11.31    1.00
  -3   0   3   11.28    0.87
  -3   0   3   12.39    0.98
  -3   0   3   11.86    1.09
  -3   0   3   11.00    0.97
  -3   0   3   11.40    0.97
   3   0  -3   11.76    0.92
  -4   0   3   76.85    3.40
  -4   0   3   81.80    3.37
   4   0  -3   79.49    3.40
   4   0  -3   86.30    3.17
  -4   0   3   73.73    3.07
   4   0  -3   76.88    3.32
   4   0  -3   71.62    3.14
  -4   0   3   78.07    3.33
  -5   0   3    4.04    0.87
  -5   0   3    3.96    0.78
   5   0  -3    5.28    0.69
  -5   0   3    5.76    0.73
   5   0  -3    4.71    0.86
   5   0  -3    5.20    0.81
  -5   0   3    5.45    0.77
   5   0  -3    5.37    0.86
  -6   0   3   43.43    2.64
  -6   0   3   44.79    2.31
  -6   0   3   44.72    2.52
   6   0  -3   44.63    2.59
   6   0  -3   46.65    2.46
   6   0  -3   53.82    2.67
  -7   0   3   10.82    1.30
   7   0  -3   11.78    1.38
   7   0  -3    8.15    1.33
  -7   0   3    7.66    1.06
   7   0  -3    7.79    1.17
  -7   0   3    6.31    1.27
  -8   0   3   37.77    2.56
   8   0  -3   37.64    2.62
   8   0  -3   33.43    2.31
  -8   0   3   34.49    2.61
  -8   0   3   38.19    2.50
  -9   0   3    0.53    1.14
  -9   0   3    2.60    1.11
   9   0  -3    2.00    1.23
 -10   0   3   -1.26    1.01
  10   0  -3   -1.63    1.06
  11   0  -3    0.66    1.29
 -11   0   3    1.17    1.35
 -12   0   3   -0.98    1.28
 -14   1  -3    0.34    1.64
  13  -1   3    6.01    2.10
 -13   1  -3   -0.07    1.53
  12  -1   3    0.11    1.42
 -12   1  -3    1.12    1.39
 -11   1  -3   21.60    2.34
 -11   1  -3   23.28    2.16
  11  -1   3   22.51    2.58
  10  -1   3   90.23    4.80
 -10   1  -3   88.18    4.26
 -10   1  -3   81.25    4.47
  -9   1  -3    1.39    1.04
   9  -1   3    2.46    1.21
  -9   1  -3    0.22    0.86
  -9   1  -3    0.52    0.89
   9  -1   3   -0.49    0.70
  -8   1  -3    1.44    0.93
  -8   1  -3    1.97    1.03
   8  -1   3    4.60    1.12
  -8   1  -3    1.34    1.08
   8  -1   3    2.17    0.90
  -8   1  -3    0.88    0.79
   8  -1   3    1.84    1.22
  -7   1  -3   10.83    1.12
   7  -1   3    7.98    1.03
   7  -1   3    9.76    1.02
  -7   1  -3    8.80    1.16
  -7   1  -3    6.53    1.14
   7  -1   3    8.09    1.30
   7  -1   3    7.25    1.09
  -7   1  -3   10.89    1.08
  -6   1  -3   10.73    1.00
  -6   1  -3    9.71    1.08
   6  -1   3   11.62    1.08
   6  -1   3   10.12    0.99
   6  -1   3   11.43    1.28
  -6   1  -3   11.72    1.19
   6  -1   3   11.18    1.12
   5  -1   3   -0.53    0.37
   5  -1   3   -0.61    0.39
   5  -1   3    0.38    0.55
  -5   1  -3   -0.01    0.39
  -5   1  -3   -0.32    0.37
   5  -1   3    0.28    0.38
   5  -1   3   -0.15    0.34
  -5   1  -3   -0.07    0.39
  -5   1  -3   -0.40    0.39
  -5   1  -3   -0.34    0.50
   4  -1   3  555.19   19.65
   4  -1   3  563.74   18.97
   4  -1   3  580.91   19.69
  -4   1  -3  570.09   19.63
  -4   1  -3  565.54   18.98
  -4   1  -3  565.03   19.64
  -4   1  -3  613.14   19.01
  -4   1  -3  585.84   19.68
   4  -1   3  590.22   19.67
   4  -1   3  591.60   19.00
   4  -1   3  579.10   19.60
   3  -1   3  133.26    4.69
   3  -1   3  133.97    4.89
  -3   1  -3  128.29    4.87
  -3   1  -3  132.50    4.88
  -3   1  -3  128.02    4.85
   3  -1   3  124.31    4.63
   3  -1   3  130.45    4.90
   3  -1   3  131.99    4.95
  -3   1  -3  133.66    4.66
   3  -1   3  136.77    4.90
  -3   1  -3  127.87    4.66
   2  -1   3  191.80    6.77
   2  -1   3  194.05    6.53
  -2   1  -3  190.59    6.76
  -2   1  -3  193.27    6.49
  -2   1  -3  194.01    6.77
  -2   1  -3  191.86    6.54
   2  -1   3  184.81    6.76
  -2   1  -3  190.52    6.76
   2  -1   3  190.50    6.76
   2  -1   3  191.21    6.49
   2  -1   3  185.99    6.81
  -1   1  -3 1067.64   35.66
   1  -1   3 1101.09   35.68
  -1   1  -3 1068.67   35.55
  -1   1  -3 1090.57   35.67
  -1   1  -3 1065.62   34.48
   1  -1   3 1081.00   35.51
   1  -1   3 1103.81   34.54
   1  -1   3 1029.52   35.59
  -1   1  -3 1064.40   34.56
   1  -1   3 1040.40   35.66
   0   1  -3  341.94   12.00
   0   1  -3  353.61   11.67
   0  -1   3  359.09   12.07
   0   1  -3  342.49   12.03
   0  -1   3  363.47   12.02
   0  -1   3  347.46   12.05
   0   1  -3  361.27   12.05
   0  -1   3  362.16   11.66
   0   1  -3  347.25   11.59
   0  -1   3  348.16   12.05
  -1  -1   3   19.06    1.10
   1   1  -3   18.09    1.01
  -1  -1   3   19.41    1.02
  -1  -1   3   19.75    1.10
  -1  -1   3   17.96    1.07
   1   1  -3   18.92    1.11
   1   1  -3   20.64    1.00
   1   1  -3   19.42    1.07
   1   1  -3   18.63    1.06
  -1  -1   3   17.63    1.14
   2   1  -3   50.49    2.25
   2   1  -3   51.32    2.08
   3   1  -3   67.72    2.95
   3   1  -3   70.61    2.75
  -3  -1   3   67.11    3.01
  -3  -1   3   70.24    2.96
   3   1  -3   67.45    2.90
  -3  -1   3   66.84    2.94
   3   1  -3   68.99    2.81
  -3  -1   3   66.16    3.02
   4   1  -3   62.95    2.95
   4   1  -3   60.54    2.78
   4   1  -3   71.38    2.80
   4   1  -3   67.85    2.95
  -4  -1   3   64.13    3.01
  -4  -1   3   65.35    2.95
  -4  -1   3   65.01    2.97
  -5  -1   3   19.23    1.53
  -5  -1   3   22.48    1.59
  -5  -1   3   18.57    1.63
   5   1  -3   19.83    1.61
   5   1  -3   19.36    1.51
   5   1  -3   20.76    1.43
   5   1  -3   19.49    1.46
  -6  -1   3    8.07    1.17
  -6  -1   3    9.49    1.29
  -6  -1   3   10.10    1.44
  -6  -1   3    4.89    0.81
   6   1  -3    6.58    1.13
   6   1  -3    9.06    1.35
   7   1  -3   58.13    3.12
  -7  -1   3   58.76    3.34
  -7  -1   3   63.37    3.30
   7   1  -3   68.93    3.43
  -7  -1   3   59.10    3.34
   8   1  -3    7.37    1.52
   8   1  -3    7.19    1.28
  -8  -1   3    6.85    1.32
  -8  -1   3    5.87    1.41
  -8  -1   3    5.82    1.34
  -9  -1   3    0.48    1.08
   9   1  -3    1.45    1.20
  10   1  -3    2.06    1.29
 -10  -1   3    1.90    1.30
 -11  -1   3    8.82    1.83
 -12  -1   3    6.94    1.96
  13  -2   3    0.28    1.73
 -13   2  -3    1.06    1.54
 -12   2  -3   -0.13    1.35
  12  -2   3   -0.24    1.47
  11  -2   3    3.11    1.53
 -11   2  -3    0.12    0.99
 -11   2  -3    0.84    1.24
 -10   2  -3    4.22    1.38
 -10   2  -3    5.41    1.20
  10  -2   3    6.54    1.67
   9  -2   3   31.85    2.64
  -9   2  -3   29.85    2.42
  -8   2  -3   26.22    1.80
  -8   2  -3   26.22    1.88
  -8   2  -3   25.86    2.03
   8  -2   3   27.76    2.09
   8  -2   3   23.49    1.84
   8  -2   3   25.53    2.30
  -8   2  -3   25.81    2.12
  -7   2  -3   24.00    1.84
   7  -2   3   22.13    1.76
  -7   2  -3   25.15    1.79
   7  -2   3   27.44    1.70
   7  -2   3   25.21    1.53
   7  -2   3   23.82    1.99
  -7   2  -3   24.79    1.66
  -6   2  -3    2.64    0.68
  -6   2  -3    3.96    0.89
   6  -2   3    3.47    0.93
  -6   2  -3    4.22    0.85
   6  -2   3    3.09    0.71
   6  -2   3    3.32    0.71
   6  -2   3    1.82    0.58
   6  -2   3    2.03    0.78
  -6   2  -3    3.75    0.74
  -5   2  -3    3.26    0.74
   5  -2   3    3.79    0.90
   5  -2   3    3.14    0.73
   5  -2   3    3.13    0.70
  -5   2  -3    2.91    0.68
   5  -2   3    4.32    0.71
   5  -2   3    5.07    0.64
  -5   2  -3    2.79    0.78
  -5   2  -3    3.52    0.69
  -4   2  -3   84.86    3.31
   4  -2   3   81.80    3.46
  -4   2  -3   84.09    3.48
   4  -2   3   83.27    3.55
   4  -2   3   86.62    3.48
  -4   2  -3   82.25    3.41
   4  -2   3   80.31    3.18
  -4   2  -3   86.62    3.30
   3  -2   3   38.47    1.89
   3  -2   3   32.73    1.89
  -3   2  -3   38.81    1.73
  -3   2  -3   36.38    1.79
   3  -2   3   38.13    1.86
  -3   2  -3   37.61    1.74
   3  -2   3   38.29    1.85
  -3   2  -3   37.59    1.87
   2  -2   3 1549.45   57.73
   2  -2   3 1865.69   59.80
  -2   2  -3 1817.91   59.53
   2  -2   3 2018.63   59.60
   2  -2   3 1519.38   59.64
  -2   2  -3 1894.35   59.76
  -2   2  -3 1852.80   57.90
  -2   2  -3 1886.39   57.83
   2  -2   3 1808.72   59.62
  -1   2  -3  220.51    7.31
   1  -2   3  206.97    7.64
  -1   2  -3  219.41    7.61
   1  -2   3  215.74    7.27
  -1   2  -3  213.59    7.37
   1  -2   3  208.40    7.62
  -1   2  -3  215.32    7.60
   1  -2   3  229.64    7.64
   0  -2   3    2.81    0.51
   0   2  -3    3.09    0.48
   0   2  -3    2.71    0.54
   0  -2   3    2.69    0.50
   0   2  -3    3.22    0.49
   0  -2   3    3.20    0.43
   0  -2   3    2.74    0.56
   0   2  -3    2.88    0.43
  -1  -2   3   11.48    1.00
  -1  -2   3   11.92    0.95
  -1  -2   3   12.01    0.91
   1   2  -3   10.74    0.91
   1   2  -3   11.81    0.79
   1   2  -3   11.24    0.86
   1   2  -3   11.35    0.83
  -1  -2   3   11.58    0.77
  -2  -2   3  102.13    3.74
   2   2  -3  103.27    3.98
   2   2  -3  103.60    3.81
   2   2  -3  100.79    3.88
  -2  -2   3  101.78    4.03
  -2  -2   3  110.42    4.04
   2   2  -3  102.17    3.89
   2   2  -3  106.51    4.05
  -2  -2   3  100.24    4.07
  -3  -2   3    0.45    0.42
  -3  -2   3    0.84    0.44
  -3  -2   3    0.10    0.37
  -3  -2   3    0.38    0.63
  -3  -2   3    0.76    0.53
   3   2  -3    0.27    0.46
   3   2  -3   -0.16    0.48
  -3  -2   3    0.54    0.63
   3   2  -3    0.04    0.46
   3   2  -3    0.51    0.41
  -4  -2   3    1.57    0.64
  -4  -2   3    0.76    0.55
   4   2  -3    1.79    0.63
  -5  -2   3   16.98    1.68
  -5  -2   3   17.37    1.55
  -5  -2   3   17.17    1.53
   5   2  -3   18.65    1.69
  -5  -2   3   17.64    1.27
   5   2  -3   19.12    1.48
   5   2  -3   17.14    1.50
   5   2  -3   20.24    1.45
   6   2  -3  198.55    6.83
  -6  -2   3  190.27    7.25
  -6  -2   3  174.39    7.12
  -6  -2   3  171.87    7.19
   6   2  -3  168.36    6.81
  -6  -2   3  174.80    6.51
   6   2  -3  173.39    7.00
   6   2  -3  178.98    7.14
  -7  -2   3    5.03    1.29
   7   2  -3    4.54    1.18
  -7  -2   3    4.69    1.18
  -7  -2   3    2.36    1.20
   7   2  -3    4.45    1.29
   8   2  -3   14.40    1.62
   8   2  -3   18.75    1.94
  -8  -2   3   17.40    1.88
  -8  -2   3   16.24    1.87
  -8  -2   3   14.42    1.70
   9   2  -3   -0.97    1.03
  -9  -2   3    0.57    1.13
  -9  -2   3   -0.55    0.84
 -10  -2   3    1.64    1.32
 -11  -2   3    0.88    1.29
 -12  -2   3   -2.47    1.33
 -13   3  -3   -0.31    1.44
  13  -3   3   -1.30    1.53
  12  -3   3   -3.07    1.35
 -12   3  -3    0.55    1.31
  11  -3   3   -0.04    1.47
 -11   3  -3   -0.97    1.10
  10  -3   3    6.20    1.64
 -10   3  -3    5.24    1.39
  -9   3  -3    0.01    0.96
  -9   3  -3    1.90    0.90
   9  -3   3    2.01    1.22
   9  -3   3    0.51    0.94
   8  -3   3    2.69    1.17
  -8   3  -3    3.51    1.11
   8  -3   3    2.61    1.02
  -8   3  -3    2.44    0.88
  -7   3  -3    0.33    0.64
  -7   3  -3    0.81    0.74
   7  -3   3   -0.46    0.52
   7  -3   3   -0.06    0.73
   7  -3   3   -1.43    0.75
   7  -3   3   -0.35    0.36
  -7   3  -3    0.62    0.63
  -7   3  -3   -0.64    0.73
   6  -3   3   10.84    1.09
  -6   3  -3   13.86    1.24
  -6   3  -3   14.18    1.38
   6  -3   3   13.46    1.34
  -6   3  -3   14.46    1.30
  -6   3  -3   14.11    1.41
   6  -3   3   14.49    1.49
   6  -3   3   13.53    1.36
   6  -3   3   12.00    0.96
  -5   3  -3  311.59   11.12
  -5   3  -3  312.20   10.70
   5  -3   3  310.72   10.60
   5  -3   3  305.69   10.68
   5  -3   3  296.46   11.15
  -5   3  -3  327.52   10.71
  -5   3  -3  307.20   11.04
   5  -3   3  326.81   11.16
   5  -3   3  297.41   11.11
   4  -3   3    1.11    0.46
  -4   3  -3    1.66    0.62
   4  -3   3    0.79    0.60
  -4   3  -3    0.57    0.46
  -4   3  -3    0.30    0.43
   4  -3   3    0.54    0.52
   4  -3   3    0.89    0.50
  -4   3  -3    1.01    0.47
   4  -3   3    0.60    0.36
   4  -3   3    1.37    0.48
  -3   3  -3   26.66    1.46
   3  -3   3   26.84    1.38
  -3   3  -3   28.60    1.58
   3  -3   3   26.14    1.53
   3  -3   3   26.64    1.66
  -3   3  -3   28.42    1.45
   3  -3   3   25.38    1.55
  -3   3  -3   28.06    1.52
  -2   3  -3   30.39    1.46
  -2   3  -3   28.61    1.48
   2  -3   3   29.46    1.60
   2  -3   3   29.03    1.59
  -2   3  -3   32.22    1.60
   2  -3   3   29.82    1.40
  -2   3  -3   28.63    1.53
   2  -3   3   27.40    1.64
  -1   3  -3  298.14   10.09
   1  -3   3  291.81   10.54
   1  -3   3  305.45   10.54
  -1   3  -3  308.93   10.50
   1  -3   3  318.96   10.50
   1  -3   3  288.60   10.52
  -1   3  -3  303.66   10.48
  -1   3  -3  294.95   10.17
   1  -3   3  311.48   10.05
   0   3  -3   -0.69    0.31
   0   3  -3   -0.43    0.32
   0  -3   3    0.03    0.33
   0  -3   3   -0.07    0.38
   0  -3   3   -0.76    0.32
   0   3  -3   -0.18    0.32
   0  -3   3   -0.22    0.44
   0   3  -3   -0.54    0.37
   0  -3   3   -0.54    0.37
  -1  -3   3  126.13    4.96
   1   3  -3  128.07    4.79
   1   3  -3  135.62    4.93
  -1  -3   3  133.45    4.63
  -1  -3   3  135.39    4.95
  -1  -3   3  125.42    4.99
  -1  -3   3  139.43    5.01
   1   3  -3  134.96    4.72
   1   3  -3  133.10    4.95
   2   3  -3   80.37    3.43
   2   3  -3   84.08    3.38
   2   3  -3   85.99    3.23
   3   3  -3   20.72    1.34
   3   3  -3   21.77    1.50
  -3  -3   3   18.13    1.47
   3   3  -3   19.49    1.24
   3   3  -3   21.12    1.36
  -3  -3   3   19.53    1.41
  -3  -3   3   17.67    1.37
  -3  -3   3   19.63    1.53
  -3  -3   3   18.28    1.40
  -3  -3   3   19.55    1.17
  -4  -3   3    0.30    0.30
   4   3  -3    1.14    0.62
  -4  -3   3    1.23    0.50
   5   3  -3   60.44    2.75
  -5  -3   3   58.19    2.54
   5   3  -3   59.87    2.88
   5   3  -3   54.69    2.79
   5   3  -3   61.39    3.03
  -5  -3   3   57.31    2.96
  -5  -3   3   55.92    3.03
   6   3  -3  211.87    7.94
  -6  -3   3  212.70    8.33
  -6  -3   3  210.18    8.22
  -6  -3   3  210.79    8.30
   6   3  -3  214.19    8.24
   7   3  -3   61.60    3.40
  -7  -3   3   63.36    3.52
  -7  -3   3   58.12    3.31
  -7  -3   3   64.27    3.47
   7   3  -3   58.90    3.17
  -8  -3   3    4.10    1.15
   8   3  -3    2.87    1.22
   8   3  -3    5.14    1.17
  -8  -3   3    3.42    1.27
   9   3  -3    2.18    1.09
  -9  -3   3    2.62    1.28
  -9  -3   3    2.78    1.20
 -10  -3   3    0.98    1.23
 -11  -3   3   -0.72    1.23
 -12  -3   3   -0.95    1.34
  13  -4   3    1.16    1.75
 -12   4  -3   -1.42    1.30
  12  -4   3    0.61    1.51
 -11   4  -3   -1.34    1.15
  11  -4   3    0.01    1.37
  10  -4   3    0.78    1.33
 -10   4  -3    1.01    1.20
  -9   4  -3   -1.43    0.95
   9  -4   3    1.64    1.07
  -9   4  -3    0.53    0.89
   9  -4   3    0.25    1.17
   8  -4   3    5.98    1.44
  -8   4  -3    6.04    1.28
  -8   4  -3    5.51    1.11
   8  -4   3    4.03    1.19
  -7   4  -3   -0.81    0.82
  -7   4  -3    0.16    0.74
   7  -4   3   -0.02    0.96
   7  -4   3    0.10    0.82
   6  -4   3   34.54    2.18
   6  -4   3   30.54    2.11
  -6   4  -3   32.09    1.97
   6  -4   3   33.03    1.87
  -6   4  -3   36.40    2.13
  -6   4  -3   31.62    2.11
  -6   4  -3   31.11    1.92
   6  -4   3   31.42    2.24
   5  -4   3    1.92    0.58
   5  -4   3    1.71    0.36
  -5   4  -3    1.70    0.76
   5  -4   3    1.62    0.79
  -5   4  -3    1.96    0.66
  -5   4  -3    3.21    0.73
   5  -4   3    1.23    0.71
   5  -4   3    1.36    0.65
  -5   4  -3    0.52    0.62
   4  -4   3   34.71    2.14
  -4   4  -3   33.48    1.91
  -4   4  -3   32.69    1.83
   4  -4   3   35.97    1.76
   4  -4   3   40.94    2.08
   4  -4   3   32.25    2.00
  -4   4  -3   39.11    1.95
  -4   4  -3   34.82    2.01
   3  -4   3  156.23    6.23
  -3   4  -3  171.56    6.24
   3  -4   3  160.52    6.23
  -3   4  -3  170.69    5.95
  -3   4  -3  163.97    6.13
   3  -4   3  173.18    6.24
   3  -4   3  165.57    5.81
  -3   4  -3  162.48    6.00
   3  -4   3  171.92    6.28
  -2   4  -3   15.17    1.08
  -2   4  -3   17.71    1.28
   2  -4   3   17.67    1.04
   2  -4   3   17.64    1.26
   2  -4   3   16.99    1.27
  -2   4  -3   17.03    1.15
  -2   4  -3   17.10    1.20
   2  -4   3   15.95    1.28
   2  -4   3   17.11    1.26
   1  -4   3   96.54    3.54
   1  -4   3   93.40    3.87
   1  -4   3   93.28    3.91
  -1   4  -3  101.81    3.90
  -1   4  -3   97.75    3.75
  -1   4  -3   99.71    3.67
  -1   4  -3   97.64    3.79
   1  -4   3  101.52    3.88
   1  -4   3  100.49    3.91
   0  -4   3  195.95    7.14
   0   4  -3  197.24    6.78
   0  -4   3  191.63    7.13
   0   4  -3  194.01    7.08
   0  -4   3  202.58    7.16
   0   4  -3  192.21    6.86
   0   4  -3  197.41    7.03
   0  -4   3  197.48    7.04
   1   4  -3   31.50    1.51
  -1  -4   3   30.14    1.68
   1   4  -3   27.84    1.57
   1   4  -3   30.14    1.70
   1   4  -3   29.51    1.56
  -1  -4   3   27.00    1.62
  -1  -4   3   28.91    1.65
  -1  -4   3   27.57    1.69
   2   4  -3    8.91    0.87
  -2  -4   3    6.02    0.82
   2   4  -3    8.47    0.96
   2   4  -3   10.59    0.93
  -2  -4   3    6.27    0.84
  -2  -4   3    9.49    1.04
   2   4  -3   11.99    1.06
   2   4  -3   10.24    0.98
   3   4  -3   52.63    2.52
   3   4  -3   56.89    2.45
   3   4  -3   56.30    2.68
  -3  -4   3   53.07    2.68
  -3  -4   3   57.50    2.77
  -3  -4   3   58.52    2.66
  -3  -4   3   56.41    2.71
  -3  -4   3   54.10    2.73
   3   4  -3   53.78    2.53
  -4  -4   3    0.79    0.63
  -4  -4   3    0.38    0.57
  -4  -4   3    2.12    0.79
   4   4  -3    2.64    0.65
  -4  -4   3    1.20    0.69
   4   4  -3    2.42    0.76
   4   4  -3    1.46    0.65
  -5  -4   3    0.65    0.72
  -5  -4   3   -0.96    0.55
  -5  -4   3   -0.93    0.71
   5   4  -3   -0.85    0.69
   5   4  -3   -1.08    0.53
  -5  -4   3   -1.20    0.71
   5   4  -3   -0.23    0.65
  -5  -4   3   -0.94    0.71
  -6  -4   3   10.12    1.42
  -6  -4   3    9.05    1.37
   6   4  -3   12.06    1.39
   6   4  -3   10.06    1.41
  -6  -4   3   10.15    1.54
  -7  -4   3    0.06    0.99
  -7  -4   3   -0.48    0.82
  -7  -4   3   -1.00    0.78
   7   4  -3   -1.27    0.75
   8   4  -3    0.35    0.91
  -8  -4   3    0.01    0.87
  -8  -4   3   -1.13    1.02
   9   4  -3   -0.16    0.87
  -9  -4   3   -0.44    1.09
  -9  -4   3   -1.25    0.84
 -10  -4   3    0.50    1.19
 -11  -4   3   -0.85    1.20
  13  -5   3   -0.96    1.72
  12  -5   3   -1.77    1.47
  11  -5   3   -1.97    1.32
 -10   5  -3    5.85    1.48
  10  -5   3    4.74    1.60
   9  -5   3    4.77    1.33
  -9   5  -3    7.28    1.45
  -9   5  -3    6.77    1.27
   9  -5   3    6.20    1.53
   8  -5   3   35.72    2.54
   8  -5   3   35.32    2.69
  -8   5  -3   32.07    2.48
  -8   5  -3   34.08    2.29
  -7   5  -3    0.07    0.88
  -7   5  -3   -0.44    0.71
   7  -5   3    1.41    0.93
   7  -5   3    0.09    0.97
  -6   5  -3    6.04    1.13
   6  -5   3    5.50    1.14
   6  -5   3    3.03    0.80
   6  -5   3    4.62    1.16
  -6   5  -3    4.77    0.97
   5  -5   3   27.60    1.99
  -5   5  -3   32.41    2.05
  -5   5  -3   33.87    1.99
   5  -5   3   32.84    2.19
  -5   5  -3   35.70    1.95
  -5   5  -3   31.63    1.95
   5  -5   3   36.62    2.07
   4  -5   3   18.11    1.46
   4  -5   3   17.63    1.42
   4  -5   3   13.47    1.36
  -4   5  -3   16.23    1.31
  -4   5  -3   14.38    1.28
  -4   5  -3   15.84    1.27
   4  -5   3   18.38    1.56
  -4   5  -3   15.28    1.40
   3  -5   3   17.19    1.40
  -3   5  -3   18.17    1.31
   3  -5   3   19.07    1.51
  -3   5  -3   18.02    1.27
   3  -5   3   21.20    1.44
   3  -5   3   19.12    1.41
  -3   5  -3   17.36    1.38
  -2   5  -3    0.74    0.46
   2  -5   3    3.40    0.81
   2  -5   3    4.04    0.72
   2  -5   3    1.31    0.61
  -2   5  -3    1.71    0.57
  -2   5  -3    0.94    0.59
   2  -5   3    3.30    0.67
  -1   5  -3   78.73    3.10
   1  -5   3   80.90    3.30
  -1   5  -3   80.67    3.22
  -1   5  -3   79.72    3.31
   1  -5   3   75.97    3.33
   1  -5   3   77.56    3.33
   1  -5   3   73.62    3.33
   0  -5   3   40.42    2.09
   0   5  -3   38.67    2.04
   0   5  -3   35.72    1.90
   0  -5   3   38.74    2.02
   0   5  -3   38.75    1.84
   0  -5   3   39.03    2.04
   1   5  -3   82.87    3.37
   1   5  -3   83.09    3.28
  -1  -5   3   79.64    3.40
   1   5  -3   80.55    3.14
  -1  -5   3   76.06    3.36
  -1  -5   3   63.80    3.17
  -1  -5   3   82.45    3.41
  -2  -5   3    9.41    1.01
  -2  -5   3    8.68    1.04
   2   5  -3   10.05    0.93
  -2  -5   3    8.73    1.10
  -2  -5   3   10.06    1.05
   2   5  -3    9.97    1.09
   2   5  -3   10.02    1.02
   3   5  -3   49.38    2.54
  -3  -5   3   50.77    2.61
   3   5  -3   48.85    2.30
  -3  -5   3   46.51    2.52
  -3  -5   3   46.62    2.54
  -3  -5   3   52.33    2.55
  -3  -5   3   48.94    2.52
   3   5  -3   46.88    2.40
  -3  -5   3   51.01    2.59
   3   5  -3   46.32    2.41
  -4  -5   3    6.32    1.05
  -4  -5   3    6.22    1.04
   4   5  -3    9.08    1.15
   4   5  -3    6.07    0.94
  -4  -5   3    6.52    1.08
   4   5  -3    7.01    0.91
  -4  -5   3    6.41    1.04
   5   5  -3    4.85    0.97
   5   5  -3    6.68    1.14
  -5  -5   3    4.68    1.12
  -5  -5   3    6.57    1.23
  -5  -5   3    5.92    1.20
  -5  -5   3    5.32    1.13
   6   5  -3   -0.17    0.75
  -6  -5   3    0.71    0.85
  -6  -5   3    1.54    1.01
  -6  -5   3   -0.58    0.91
   7   5  -3   14.32    1.65
  -7  -5   3   17.62    1.88
  -7  -5   3   14.73    1.72
  -8  -5   3   -0.09    1.13
  -8  -5   3   -1.14    0.86
   8   5  -3   -0.92    0.92
  -9  -5   3    0.99    1.12
   9   5  -3   -0.94    0.94
  -9  -5   3   -0.57    1.26
 -10  -5   3    1.24    1.40
 -11  -5   3    1.53    1.48
  12  -6   3    1.86    1.74
  11  -6   3   -0.64    1.49
  10  -6   3    0.95    1.47
  -9   6  -3    3.23    1.13
   9  -6   3    5.61    1.38
   9  -6   3    4.78    1.53
  -8   6  -3    0.52    0.83
   8  -6   3    0.87    1.13
   8  -6   3    0.26    0.95
  -7   6  -3   37.55    2.36
   7  -6   3   34.72    2.63
  -7   6  -3   39.73    2.58
   7  -6   3   41.08    2.68
  -6   6  -3    0.64    0.77
   6  -6   3    2.11    0.95
  -6   6  -3    1.95    0.94
   6  -6   3    1.99    1.06
   5  -6   3   16.54    1.67
  -5   6  -3   18.30    1.53
  -5   6  -3   16.90    1.50
   5  -6   3   20.78    1.76
  -5   6  -3   17.17    1.65
   5  -6   3   17.70    1.68
  -4   6  -3    1.82    0.79
  -4   6  -3    1.67    0.69
   4  -6   3    2.14    0.86
   4  -6   3    0.91    0.74
   4  -6   3    1.65    0.81
   4  -6   3    2.65    0.81
  -4   6  -3    1.09    0.69
   3  -6   3   17.36    1.48
  -3   6  -3   18.47    1.48
  -3   6  -3   17.89    1.37
  -3   6  -3   17.65    1.36
   3  -6   3   17.13    1.48
   3  -6   3   16.33    1.45
   3  -6   3   16.83    1.51
  -2   6  -3   38.12    2.01
   2  -6   3   40.24    2.21
   2  -6   3   38.72    1.63
   2  -6   3   42.53    2.20
  -2   6  -3   38.81    2.12
  -2   6  -3   40.42    1.98
   2  -6   3   36.27    2.17
  -1   6  -3   61.88    2.80
  -1   6  -3   60.27    2.55
  -1   6  -3   57.29    2.64
   1  -6   3   59.85    2.78
   1  -6   3   58.76    2.78
   1  -6   3   56.84    2.76
   1  -6   3   56.00    2.40
   0   6  -3   16.49    1.27
   0  -6   3   15.25    1.12
   0  -6   3   16.57    1.36
   0   6  -3   15.83    1.19
   0   6  -3   16.16    1.41
   0  -6   3   17.58    1.38
   0  -6   3   15.99    1.42
   1   6  -3   12.65    1.14
   1   6  -3   14.41    1.22
  -1  -6   3   13.97    1.34
  -1  -6   3   12.85    1.28
  -1  -6   3   13.99    1.39
   1   6  -3   15.37    1.36
  -1  -6   3   12.49    1.15
  -2  -6   3   -0.21    0.75
   2   6  -3   -0.44    0.58
   2   6  -3    0.68    0.57
   2   6  -3    0.54    0.54
  -2  -6   3   -0.49    0.53
  -2  -6   3    0.29    0.59
  -2  -6   3    0.07    0.32
  -2  -6   3   -0.12    0.59
  -3  -6   3    5.40    0.96
   3   6  -3    3.74    0.88
   3   6  -3    5.06    0.90
   3   6  -3    5.74    0.83
  -3  -6   3    4.23    0.96
  -3  -6   3    5.50    0.97
  -3  -6   3    3.78    0.93
   3   6  -3    4.49    0.87
  -4  -6   3   -0.58    0.72
  -4  -6   3   -0.19    0.72
   4   6  -3   -0.26    0.63
  -4  -6   3   -0.09    0.75
   4   6  -3    0.99    0.66
  -4  -6   3    0.66    0.71
  -5  -6   3    0.19    0.86
  -5  -6   3   -0.15    0.83
   5   6  -3    0.39    0.71
  -5  -6   3    1.14    0.83
  -5  -6   3   -0.04    0.83
  -6  -6   3    0.15    0.83
  -6  -6   3    1.33    0.97
  -6  -6   3   -1.34    0.89
   6   6  -3   -0.58    0.72
   7   6  -3    1.86    0.99
  -7  -6   3    0.10    1.06
  -7  -6   3    0.77    1.00
  -8  -6   3    1.72    1.32
   8   6  -3    1.83    1.08
  -8  -6   3    2.40    1.21
  -9  -6   3    0.85    1.38
   9   6  -3    4.06    1.35
  -9  -6   3    3.58    1.36
 -10  -6   3   -0.67    1.25
  12  -7   3    0.08    1.78
  11  -7   3   -0.15    1.55
  10  -7   3   -1.58    1.35
   9  -7   3   -0.13    1.16
   9  -7   3    2.57    1.43
  -9   7  -3    1.24    1.08
  -8   7  -3    0.34    0.91
   8  -7   3    0.55    1.17
   8  -7   3    2.09    1.12
   7  -7   3    1.56    1.03
   7  -7   3    1.22    1.15
  -7   7  -3    2.77    1.00
   6  -7   3   15.46    1.74
   6  -7   3   15.24    1.68
  -6   7  -3   14.06    1.51
   5  -7   3   -0.18    0.86
   5  -7   3   -0.74    0.72
  -5   7  -3    1.14    0.77
   4  -7   3   41.67    2.53
   4  -7   3   37.37    2.39
   4  -7   3   43.61    2.49
  -4   7  -3   38.65    2.26
  -3   7  -3    1.87    0.69
  -3   7  -3    0.68    0.71
  -3   7  -3    2.10    0.84
   3  -7   3    2.62    0.89
   3  -7   3    3.15    0.89
   3  -7   3    3.19    0.91
  -2   7  -3   24.38    1.66
  -2   7  -3   26.20    1.64
   2  -7   3   25.39    1.71
   2  -7   3   22.87    1.77
   2  -7   3   27.48    1.85
  -2   7  -3   26.08    1.80
   2  -7   3   25.50    1.82
   1  -7   3   50.10    2.60
   1  -7   3   54.35    2.56
  -1   7  -3   49.71    2.49
  -1   7  -3   54.73    2.64
   1  -7   3   49.29    2.64
   1  -7   3   47.16    2.20
  -1   7  -3   51.52    2.40
   1  -7   3   52.38    2.67
   0  -7   3    0.39    0.71
   0  -7   3    0.08    0.65
   0  -7   3    0.70    0.68
   0   7  -3    2.09    0.75
   0  -7   3    0.28    0.60
   0  -7   3   -0.59    0.70
   0   7  -3    0.68    0.59
  -1  -7   3   38.59    2.11
  -1  -7   3   36.03    2.21
  -1  -7   3   36.88    2.22
   1   7  -3   37.33    2.12
  -1  -7   3   42.02    2.31
   1   7  -3   40.95    2.05
  -2  -7   3   16.19    1.57
  -2  -7   3   15.39    1.52
  -2  -7   3   13.23    1.38
  -2  -7   3   15.44    1.42
   2   7  -3   15.96    1.28
   2   7  -3   14.24    1.38
  -2  -7   3   15.67    1.45
   3   7  -3    1.04    0.76
  -3  -7   3    0.34    0.81
  -3  -7   3    1.33    0.75
  -3  -7   3    0.57    0.85
  -3  -7   3    0.52    0.81
   4   7  -3    6.88    1.14
  -4  -7   3    7.33    1.26
  -4  -7   3    4.86    1.08
   4   7  -3    6.21    1.16
  -4  -7   3    6.04    1.25
  -5  -7   3   -0.41    0.87
  -5  -7   3    0.51    0.79
  -5  -7   3    0.65    0.88
  -5  -7   3   -0.39    0.84
   5   7  -3    0.11    0.80
   5   7  -3    0.03    0.76
   6   7  -3    2.11    0.90
  -6  -7   3    1.71    1.02
  -6  -7   3    1.30    1.09
  -7  -7   3    0.30    1.04
   7   7  -3   -0.87    0.80
  -7  -7   3   -0.32    0.90
  -8  -7   3    1.87    1.22
  -8  -7   3    0.67    1.11
   8   7  -3    1.75    1.17
  -9  -7   3   -0.84    1.12
  -9  -7   3   -1.51    1.14
   9   7  -3    0.06    1.10
  11  -8   3   -0.72    1.53
  10  -8   3    1.51    1.58
   9  -8   3    0.89    1.26
   9  -8   3    2.08    1.48
  -9   8  -3    1.11    1.12
  -8   8  -3    9.28    1.52
   8  -8   3    7.42    1.73
   8  -8   3    9.01    1.69
   7  -8   3   -0.73    1.09
   7  -8   3   -1.24    0.90
  -7   8  -3   -1.00    0.86
  -6   8  -3    7.61    1.30
   6  -8   3    9.46    1.48
   6  -8   3   10.05    1.51
  -5   8  -3   18.52    1.71
   5  -8   3   17.47    1.79
   5  -8   3   17.09    1.77
  -4   8  -3   36.26    2.27
   4  -8   3   38.15    2.48
   4  -8   3   38.18    2.51
  -3   8  -3    5.65    1.07
   3  -8   3    5.08    1.13
   3  -8   3    5.06    1.16
   3  -8   3    7.00    1.22
  -2   8  -3    1.39    0.81
   2  -8   3    2.62    0.95
  -2   8  -3    0.90    0.70
   2  -8   3    0.60    0.84
   2  -8   3    1.64    0.86
  -1   8  -3    5.39    0.88
  -1   8  -3    5.15    0.96
   1  -8   3    4.15    0.71
   1  -8   3    4.16    0.94
   1  -8   3    4.61    0.98
   1  -8   3    4.89    1.05
   0  -8   3    0.79    0.76
   0  -8   3    1.68    0.68
   0   8  -3    0.06    0.69
   0  -8   3    1.20    0.80
   0   8  -3    1.24    0.65
   0  -8   3   -0.19    0.68
  -1  -8   3   29.65    2.00
  -1  -8   3   32.95    2.09
  -1  -8   3   29.19    1.88
   1   8  -3   29.11    1.94
  -1  -8   3   28.69    2.03
  -2  -8   3    0.29    0.79
  -2  -8   3    0.23    0.82
  -2  -8   3   -0.88    0.70
   2   8  -3    1.12    0.74
  -2  -8   3    0.66    0.82
  -3  -8   3   11.61    1.44
   3   8  -3   10.06    1.30
  -3  -8   3   13.01    1.51
  -3  -8   3   11.55    1.37
  -4  -8   3   15.04    1.59
  -4  -8   3   16.23    1.72
  -4  -8   3   17.37    1.82
   4   8  -3   17.19    1.67
  -5  -8   3    2.65    1.22
   5   8  -3   -0.06    0.86
   5   8  -3    2.14    0.91
  -5  -8   3    2.76    1.13
  -5  -8   3    1.50    1.04
  -5  -8   3    0.40    0.89
  -6  -8   3    2.30    1.09
   6   8  -3    2.18    1.03
   6   8  -3    1.02    0.92
  -6  -8   3    0.61    0.99
  -7  -8   3    0.98    1.05
   7   8  -3    1.97    1.04
  -7  -8   3   -1.17    1.05
   7   8  -3    0.01    0.96
   8   8  -3    0.02    1.00
  -8  -8   3    0.18    1.07
   8   8  -3   -0.34    1.02
  -8  -8   3    0.11    1.12
  -9  -8   3    4.18    1.48
  10  -9   3    1.80    1.62
   9  -9   3    0.90    1.49
   9  -9   3   -1.19    1.25
   8  -9   3   14.63    2.08
   8  -9   3   11.69    1.97
  -8   9  -3   13.35    1.78
   7  -9   3    3.06    1.36
   7  -9   3    1.70    1.18
  -7   9  -3    0.01    0.89
  -6   9  -3    4.91    1.24
   6  -9   3    6.64    1.40
   6  -9   3    5.08    1.30
   5  -9   3    3.12    1.23
   5  -9   3    3.95    1.18
  -5   9  -3    3.68    1.07
   4  -9   3   63.05    3.45
  -4   9  -3   59.80    3.20
   4  -9   3   62.89    3.32
  -3   9  -3   10.53    1.40
   3  -9   3    4.99    1.26
   3  -9   3    6.22    1.30
  -2   9  -3    2.62    0.98
   2  -9   3    2.65    1.04
   2  -9   3    1.90    0.98
  -1   9  -3    4.20    1.00
   1  -9   3    4.42    1.09
   1  -9   3    2.95    0.97
   0  -9   3    4.65    1.05
   0   9  -3    5.03    1.00
   0  -9   3    5.37    1.09
  -1  -9   3   -0.23    0.80
   1   9  -3    1.61    0.80
  -1  -9   3    0.74    0.82
  -1  -9   3    0.14    0.82
  -2  -9   3   -0.98    0.73
   2   9  -3   -0.71    0.67
  -2  -9   3   -0.92    0.65
  -2  -9   3   -0.92    0.77
   3   9  -3    0.09    0.77
  -3  -9   3    1.43    0.83
  -3  -9   3   -0.08    0.88
  -3  -9   3   -0.16    0.92
   4   9  -3    3.75    1.09
  -4  -9   3    2.60    1.12
  -4  -9   3    1.17    0.96
  -4  -9   3    2.49    1.17
  -5  -9   3    1.55    1.01
   5   9  -3   -0.91    0.84
  -5  -9   3    1.68    1.12
  -5  -9   3    1.06    0.93
  -6  -9   3    1.76    1.18
   6   9  -3    1.60    1.11
  -6  -9   3    0.51    1.09
   7   9  -3    0.63    1.01
   7   9  -3    0.46    0.97
  -7  -9   3   -0.38    1.04
  -7  -9   3    0.17    1.06
  -8  -9   3   -1.29    1.09
   9 -10   3    3.38    1.60
   9 -10   3    1.79    1.56
   8 -10   3   -0.76    1.22
   8 -10   3   -0.15    1.31
  -8  10  -3    0.47    1.06
  -7  10  -3   -0.66    1.02
   7 -10   3   -0.50    1.09
   7 -10   3   -2.70    1.19
  -6  10  -3   -0.08    0.99
   6 -10   3    1.71    1.18
   6 -10   3   -0.05    1.18
   5 -10   3    5.16    1.35
  -5  10  -3    6.52    1.34
   5 -10   3    8.71    1.48
   4 -10   3    2.83    1.09
   4 -10   3    1.90    1.13
  -4  10  -3    1.03    0.95
   3 -10   3   27.02    2.06
   3 -10   3   22.41    2.13
  -3  10  -3   23.63    2.00
   2 -10   3    0.09    0.97
  -2  10  -3   -0.59    0.83
   2 -10   3    0.15    0.86
   1 -10   3    0.36    0.93
   1 -10   3   -0.69    0.77
  -1  10  -3    0.15    0.83
   0  10  -3   25.82    1.98
   0 -10   3   24.53    2.09
   0 -10   3   27.56    1.96
  -1 -10   3   -0.99    0.67
  -1 -10   3    0.05    0.91
   1  10  -3    0.33    0.87
   2  10  -3    2.03    1.01
  -2 -10   3    1.37    0.83
  -2 -10   3    1.07    0.94
   3  10  -3    1.40    0.89
  -3 -10   3   -0.62    0.81
  -3 -10   3   -0.87    0.92
  -4 -10   3    0.58    0.88
   4  10  -3   -0.12    0.85
  -4 -10   3    0.63    1.02
  -5 -10   3    2.06    1.17
  -5 -10   3    2.14    1.06
   5  10  -3    2.00    1.16
  -5 -10   3    2.63    1.32
  -6 -10   3    3.22    1.48
   6  10  -3    3.43    1.34
  -6 -10   3    4.75    1.35
   8 -11   3    5.17    1.60
  -8  11  -3    4.14    1.46
   8 -11   3    3.96    1.61
   7 -11   3    0.49    1.28
   7 -11   3   -0.56    1.18
  -7  11  -3    0.30    1.02
   6 -11   3   -0.63    1.11
   6 -11   3   -0.90    1.05
  -6  11  -3    1.04    1.15
  -5  11  -3    1.20    1.04
   5 -11   3    1.97    1.14
   5 -11   3   -0.14    1.05
  -4  11  -3    2.33    1.14
   4 -11   3    2.50    1.19
   4 -11   3    2.16    1.08
  -3  11  -3   -0.09    0.93
   3 -11   3    0.93    0.86
   3 -11   3   -0.06    0.97
   2 -11   3    3.09    1.16
   2 -11   3    3.17    1.01
  -2  11  -3    3.23    1.09
  -1  11  -3   -0.34    0.83
   1 -11   3    1.23    0.88
   1 -11   3    1.19    1.06
   0 -11   3    0.94    0.78
   0 -11   3    1.45    1.08
   0  11  -3    0.00    0.88
   1  11  -3    0.62    0.96
  -1 -11   3    2.19    1.07
  -1 -11   3    0.58    0.75
   2  11  -3    0.84    0.94
  -2 -11   3   -0.21    0.78
  -2 -11   3    1.13    1.05
  -3 -11   3    0.81    1.03
   3  11  -3    0.07    0.99
  -3 -11   3   -0.92    0.69
  -4 -11   3    1.03    1.17
  -4 -11   3    5.58    1.05
   4  11  -3    2.78    1.22
   5  11  -3    2.03    1.22
  -5 -11   3   -1.70    1.17
  -5 -11   3    1.37    1.04
  -5 -11   3   -0.52    1.20
   6 -12   3    2.30    1.24
  -6  12  -3   -0.25    1.10
   6 -12   3    2.25    1.29
   5 -12   3   -1.14    1.04
  -5  12  -3    1.67    1.15
   5 -12   3   -0.91    0.92
   4 -12   3   -0.37    0.93
  -4  12  -3    0.09    1.06
   4 -12   3   -0.31    1.10
   3 -12   3    1.54    1.15
   3 -12   3    0.71    0.88
  -3  12  -3    0.85    1.04
  -2  12  -3    0.72    1.00
   2 -12   3    0.48    0.83
   2 -12   3    0.98    1.07
   1 -12   3    0.10    1.08
   1 -12   3    2.07    0.78
  -1  12  -3    2.24    1.09
   0 -12   3    3.26    0.77
   0 -12   3    2.18    1.25
   0  12  -3    4.10    1.28
  -1 -12   3   -2.09    0.84
   1  12  -3   -0.17    1.00
  -2 -12   3    0.50    1.04
   2  12  -3   -1.78    0.84
   3  12  -3    0.44    1.07
  -3 -12   3   -0.13    0.99
   0  15   4    2.82    0.62
   0  15   4    1.44    0.65
  -1  15   4   -0.32    0.60
   1 -15  -4    0.48    0.59
   2 -15  -4   -0.03    0.64
  -2  15   4    0.30    0.73
   2 -15  -4    0.49    0.81
  -3  15   4    1.53    0.76
   3 -15  -4    1.08    0.85
   5  14   4    0.84    0.76
  -5 -14  -4    0.20    0.77
  -5 -14  -4    1.18    0.74
   4  14   4    1.32    0.52
   4  14   4    0.87    0.61
   3  14   4    0.61    0.44
   3  14   4    0.37    0.54
   0  14   4    1.03    0.54
   1 -14  -4   -0.80    0.53
  -1  14   4    0.38    0.53
  -1  14   4   -0.17    0.56
   2 -14  -4    1.84    0.83
  -2  14   4    1.11    0.70
  -2  14   4    0.55    0.71
   2 -14  -4    1.81    0.74
   3 -14  -4    0.10    0.76
   3 -14  -4   -0.04    0.71
  -3  14   4   -0.68    0.60
  -4  14   4    2.77    0.88
   4 -14  -4    1.80    0.94
   5 -14  -4   -0.36    0.89
  -5  14   4   -0.07    0.82
   7  13   4    2.20    0.80
  -7 -13  -4    1.00    0.89
  -6 -13  -4   10.72    1.33
   6  13   4    9.00    1.18
  -6 -13  -4   10.17    1.25
  -5 -13  -4    3.07    0.85
  -5 -13  -4    0.71    0.78
   5  13   4    1.09    0.68
  -4 -13  -4    0.54    0.56
  -4 -13  -4   -0.01    0.61
   4  13   4   -0.70    0.48
   4  13   4    0.35    0.42
   1 -13  -4   -0.16    0.57
   1 -13  -4   -0.09    0.49
  -1  13   4   -0.20    0.45
  -1  13   4   -0.20    0.50
  -2  13   4    6.25    0.83
   2 -13  -4    6.53    0.93
   2 -13  -4    7.28    1.03
  -2  13   4    4.21    0.76
   3 -13  -4    4.55    0.96
   3 -13  -4    2.99    0.87
  -3  13   4    2.97    0.75
  -4  13   4    4.74    0.95
   4 -13  -4    5.24    1.10
  -5  13   4   10.36    1.29
   5 -13  -4   10.46    1.46
   6 -13  -4    1.30    1.05
  -6  13   4   -0.45    0.82
   7 -13  -4    2.41    1.32
  -7  13   4    2.44    1.06
  -8 -12  -4    1.37    1.03
   8  12   4    1.28    0.89
  -7 -12  -4    0.75    0.82
   7  12   4    0.45    0.73
  -6 -12  -4   15.30    1.51
  -6 -12  -4   13.63    1.41
   6  12   4   12.55    1.27
   5  12   4    4.39    0.68
   5  12   4    3.32    0.74
  -5 -12  -4    4.35    0.88
  -5 -12  -4    3.81    0.91
  -4 -12  -4    0.17    0.58
  -4 -12  -4   -0.35    0.57
   4  12   4   -0.18    0.36
   4  12   4   -0.41    0.45
   1 -12  -4    1.28    0.59
   1 -12  -4   -0.09    0.49
  -2  12   4   16.84    1.21
   2 -12  -4   20.63    1.54
  -2  12   4   19.84    1.28
   2 -12  -4   18.07    1.37
   3 -12  -4    1.00    0.68
  -3  12   4    1.51    0.71
  -3  12   4    0.72    0.58
   3 -12  -4    2.47    0.81
  -4  12   4    0.10    0.63
   4 -12  -4   -0.61    0.66
   4 -12  -4    0.33    0.77
  -5  12   4    3.20    0.92
   5 -12  -4    2.44    1.02
   6 -12  -4   -0.87    0.93
   6 -12  -4   -0.09    0.67
  -6  12   4   -0.02    0.78
   7 -12  -4    5.08    1.12
  -7  12   4    6.85    1.23
   7 -12  -4    6.29    1.47
   8 -12  -4    2.76    1.13
   8 -12  -4    1.48    1.37
  -8  12   4    1.21    1.02
  -9 -11  -4    0.22    1.01
   9  11   4    0.14    0.88
   8  11   4    0.37    0.78
  -8 -11  -4    1.00    0.93
   7  11   4    0.20    0.67
  -7 -11  -4   -0.24    0.76
   6  11   4   -0.25    0.55
   6  11   4    0.29    0.54
  -6 -11  -4    0.34    0.71
  -6 -11  -4   -0.15    0.72
  -5 -11  -4    4.86    0.88
  -5 -11  -4    6.06    0.92
   5  11   4    4.96    0.75
   5  11   4    4.42    0.67
  -4 -11  -4   13.68    1.14
  -4 -11  -4   12.35    1.10
   4  11   4   12.36    0.94
   2  11   4   12.08    1.33
   1 -11  -4    3.71    0.66
   1 -11  -4    2.16    0.58
   2 -11  -4   25.15    1.62
  -2  11   4   22.60    1.36
   2 -11  -4   24.68    1.51
  -2  11   4   24.23    1.36
   3 -11  -4   10.81    1.15
   3 -11  -4   11.96    1.21
  -3  11   4   11.14    1.07
  -3  11   4   10.75    1.04
   4 -11  -4   -0.48    0.66
  -4  11   4    0.47    0.73
   4 -11  -4    0.70    0.76
  -4  11   4   -0.54    0.59
  -5  11   4   -0.29    0.66
   5 -11  -4    0.24    0.59
   5 -11  -4    0.20    0.80
   6 -11  -4    7.29    1.34
  -6  11   4    9.03    1.23
   6 -11  -4    7.63    1.12
   7 -11  -4    8.14    1.34
   7 -11  -4    8.19    1.49
  -7  11   4    6.62    1.24
   8 -11  -4   -0.53    1.12
  -8  11   4    0.10    0.94
   8 -11  -4   -1.37    1.01
   9 -11  -4    2.43    1.46
   9 -11  -4    1.73    1.33
  -9  11   4    1.12    0.99
 -10 -10  -4    9.61    1.66
  10  10   4   10.26    1.66
 -10 -10  -4   11.66    1.32
   9  10   4    2.44    1.06
  -9 -10  -4    2.45    0.75
  -9 -10  -4    0.39    1.05
   8  10   4    0.87    0.78
  -8 -10  -4    2.85    1.00
   7  10   4    0.82    0.68
  -7 -10  -4    0.14    0.70
  -7 -10  -4   -0.13    0.73
  -6 -10  -4    0.11    0.67
  -6 -10  -4   -0.61    0.64
   6  10   4    0.29    0.58
   6  10   4    0.20    0.51
  -5 -10  -4    0.41    0.61
   5  10   4    0.79    0.51
  -5 -10  -4    0.76    0.61
   5  10   4    0.39    0.49
  -4 -10  -4    0.79    0.53
  -4 -10  -4   -0.30    0.48
   4  10   4   -0.06    0.39
   3  10   4    1.40    0.77
   2  10   4   15.60    1.47
   1  10   4    0.01    0.59
   0  10   4   -0.49    0.53
  -1  10   4    2.15    0.65
   1 -10  -4    1.06    0.47
   1 -10  -4    2.18    0.52
   2 -10  -4   33.74    1.83
  -2  10   4   34.35    1.75
   2 -10  -4   30.37    1.72
  -2  10   4   32.30    1.55
  -2  10   4   30.18    1.59
   3 -10  -4   81.87    3.49
  -3  10   4   82.73    3.26
   3 -10  -4   84.33    3.53
  -3  10   4   78.83    3.28
   4 -10  -4    2.03    0.59
   4 -10  -4    0.75    0.72
   4 -10  -4    0.54    0.71
   4 -10  -4    1.18    0.53
  -4  10   4    0.97    0.63
  -4  10   4    1.04    0.67
   5 -10  -4    0.30    0.80
  -5  10   4    0.61    0.70
   5 -10  -4   -0.52    0.66
   5 -10  -4   -0.50    0.71
  -6  10   4   -0.09    0.70
   6 -10  -4    0.58    0.85
   6 -10  -4   -0.06    0.81
  -7  10   4    1.30    0.89
   7 -10  -4    1.21    0.99
   7 -10  -4    2.34    1.04
   8 -10  -4    2.07    1.23
   8 -10  -4    4.59    1.34
  -8  10   4    1.14    0.96
   9 -10  -4    1.88    1.43
  -9  10   4    2.96    1.17
   9 -10  -4    2.28    1.32
  10 -10  -4    0.42    1.32
  10 -10  -4   -0.43    1.45
 -11  -9  -4    2.63    1.26
  11   9   4    1.96    1.21
 -11  -9  -4    1.26    1.15
 -10  -9  -4    0.62    0.95
  10   9   4    1.00    0.97
 -10  -9  -4    0.82    1.12
  -9  -9  -4   -0.06    0.88
   9   9   4    0.15    0.80
  -9  -9  -4   -0.96    0.74
   8   9   4    1.13    0.80
  -8  -9  -4    0.11    0.67
  -8  -9  -4    0.95    0.85
   7   9   4    1.31    0.75
  -7  -9  -4    1.44    0.91
  -7  -9  -4    1.45    0.81
  -6  -9  -4   17.99    1.48
   6   9   4   15.26    1.23
  -6  -9  -4   14.70    1.38
   6   9   4   14.11    1.19
   5   9   4    0.04    0.47
  -5  -9  -4   -0.13    0.56
  -5  -9  -4    0.33    0.56
   5   9   4    0.16    0.43
  -4  -9  -4   -0.44    0.56
   4   9   4   -0.54    0.41
   4   9   4    1.40    0.83
  -4  -9  -4   -0.60    0.55
   4   9   4    0.28    0.40
   3   9   4    5.43    1.10
  -3  -9  -4    3.01    0.60
   2   9   4  146.38    5.83
   1   9   4   23.90    1.61
   0   9   4   19.73    1.35
  -1   9   4   11.31    1.02
   1  -9  -4   10.10    0.83
   1  -9  -4   11.42    0.87
   2  -9  -4   -0.13    0.44
  -2   9   4    0.48    0.40
  -2   9   4   -0.29    0.38
  -2   9   4    0.05    0.45
   2  -9  -4    0.13    0.50
   3  -9  -4    3.46    0.72
  -3   9   4    2.80    0.62
  -3   9   4    1.98    0.58
   3  -9  -4    2.81    0.72
   3  -9  -4    3.46    0.54
   4  -9  -4   64.43    3.25
  -4   9   4   74.06    3.10
   4  -9  -4   69.02    3.22
  -4   9   4   65.86    2.99
   4  -9  -4   70.66    3.01
   4  -9  -4   78.52    3.08
   5  -9  -4    7.14    1.07
   5  -9  -4    5.18    0.99
   5  -9  -4    4.18    1.00
  -5   9   4    5.54    0.93
  -5   9   4    5.44    0.97
  -6   9   4   11.48    1.27
   6  -9  -4   10.65    1.37
   6  -9  -4    8.63    1.30
   7  -9  -4    4.03    1.18
   7  -9  -4    1.33    1.04
  -7   9   4    1.40    0.92
   8  -9  -4    2.75    1.29
   8  -9  -4    1.83    1.15
  -8   9   4    1.56    0.96
  -9   9   4    0.54    0.96
   9  -9  -4   -0.04    1.24
   9  -9  -4    0.87    1.19
  10  -9  -4   11.25    1.99
  10  -9  -4   11.82    2.08
  11  -9  -4    1.16    1.62
 -11  -8  -4    2.66    1.27
  11   8   4    0.52    1.04
 -11  -8  -4    2.83    1.19
 -10  -8  -4    0.99    1.01
 -10  -8  -4    0.41    1.03
  10   8   4    2.90    1.12
   9   8   4    0.64    0.87
  -9  -8  -4    0.80    0.87
  -9  -8  -4   -0.51    0.91
   8   8   4   -0.29    0.65
  -8  -8  -4    0.49    0.82
  -8  -8  -4    0.78    0.73
  -7  -8  -4    1.27    1.11
  -7  -8  -4    2.76    0.83
   7   8   4    2.98    0.75
  -7  -8  -4    1.91    0.71
  -7  -8  -4    2.84    0.89
   7   8   4    2.68    0.77
  -6  -8  -4    6.83    1.36
   6   8   4    5.87    0.79
  -6  -8  -4    4.59    0.91
   6   8   4    5.64    0.83
  -6  -8  -4    6.75    0.99
   5   8   4   27.02    1.44
  -5  -8  -4   29.75    1.68
   5   8   4   29.28    1.49
  -5  -8  -4   26.94    1.65
  -4  -8  -4   93.60    3.60
   4   8   4   91.84    3.33
   4   8   4   95.91    4.27
  -4  -8  -4   94.89    3.62
   4   8   4   88.48    3.25
  -3  -8  -4   25.14    1.27
   3   8   4   29.35    1.94
  -3  -8  -4   26.67    1.29
   2   8   4    8.22    1.03
   1   8   4   33.80    1.88
   0   8   4   24.49    1.47
  -1   8   4    3.95    0.66
   1  -8  -4    5.23    0.55
   1  -8  -4    5.14    0.54
   2  -8  -4   12.49    1.00
  -3   8   4   27.41    1.59
   3  -8  -4   28.85    1.60
   3  -8  -4   31.46    1.72
   3  -8  -4   30.72    1.61
   3  -8  -4   30.04    1.75
  -3   8   4   31.38    1.57
   4  -8  -4   33.95    1.95
   4  -8  -4   31.43    1.98
   4  -8  -4   40.75    2.03
   4  -8  -4   31.21    1.93
  -4   8   4   34.63    1.92
  -4   8   4   31.63    1.79
   5  -8  -4   20.68    1.75
  -5   8   4   20.93    1.52
   5  -8  -4   21.84    1.75
  -5   8   4   21.78    1.68
   5  -8  -4   21.49    1.70
  -6   8   4    8.79    1.18
   6  -8  -4    8.82    1.33
   6  -8  -4    8.13    1.38
  -7   8   4    0.46    0.86
   7  -8  -4    1.64    1.04
   7  -8  -4    0.41    0.98
  -8   8   4   34.60    2.35
   8  -8  -4   34.82    2.65
   8  -8  -4   32.62    2.57
   9  -8  -4    0.41    1.24
  -9   8   4    1.14    0.95
   9  -8  -4   -0.31    1.10
  10  -8  -4   -1.07    1.13
  10  -8  -4   -2.50    1.28
  11  -8  -4    2.75    1.65
 -12  -7  -4    0.07    1.19
 -12  -7  -4    0.15    1.17
  12   7   4    0.78    1.16
 -11  -7  -4    4.53    1.38
  11   7   4    3.90    1.24
 -11  -7  -4    4.71    1.33
  10   7   4    3.68    1.13
 -10  -7  -4    5.70    1.29
 -10  -7  -4    4.40    1.28
   9   7   4    3.25    0.97
  -9  -7  -4    2.54    1.09
  -9  -7  -4    2.48    1.00
  -8  -7  -4   14.13    1.44
   8   7   4   12.59    1.35
  -8  -7  -4   13.54    1.52
  -7  -7  -4   11.42    1.17
  -7  -7  -4   11.90    1.35
  -7  -7  -4   10.06    1.28
   7   7   4    9.56    1.16
   7   7   4   10.38    1.11
  -7  -7  -4   13.33    1.70
   6   7   4    0.09    0.45
  -6  -7  -4    0.43    0.64
  -6  -7  -4   -1.14    0.49
   6   7   4   -0.31    0.50
  -6  -7  -4    0.31    0.83
  -6  -7  -4   -0.37    0.53
  -6  -7  -4   -0.06    0.48
  -5  -7  -4    3.06    0.51
  -5  -7  -4    1.84    0.60
   5   7   4    1.99    0.52
   5   7   4    2.98    0.52
  -5  -7  -4    3.61    0.66
  -5  -7  -4    3.46    0.51
   5   7   4    1.83    0.87
  -4  -7  -4  167.14    6.08
   4   7   4  176.54    6.72
   4   7   4  164.49    5.71
  -4  -7  -4  175.56    6.12
   4   7   4  166.67    5.75
  -3  -7  -4    2.05    0.44
   3   7   4    2.23    0.75
  -3  -7  -4    2.57    0.46
   1   7   4    2.64    0.64
   0   7   4   19.26    1.26
   1  -7  -4  142.97    5.00
   1  -7  -4  138.76    4.99
   2  -7  -4   97.98    3.71
  -2   7   4  108.20    3.92
   2  -7  -4  103.22    3.89
   2  -7  -4  101.43    3.89
  -2   7   4   99.92    3.65
   2  -7  -4  103.16    3.73
  -2   7   4  103.21    3.65
   3  -7  -4   42.32    2.01
   3  -7  -4   38.13    1.90
  -3   7   4   39.49    1.86
  -3   7   4   41.94    2.04
   3  -7  -4   40.25    1.97
  -3   7   4   40.60    1.82
   3  -7  -4   35.71    1.88
   4  -7  -4   52.01    2.47
  -4   7   4   45.86    2.23
   4  -7  -4   45.91    2.40
   4  -7  -4   42.44    2.41
   4  -7  -4   50.44    2.45
  -4   7   4   47.60    2.46
  -4   7   4   52.58    2.34
  -5   7   4  319.45   11.22
  -5   7   4  337.56   11.71
  -5   7   4  321.39   11.16
   5  -7  -4  319.69   11.57
   5  -7  -4  308.08   11.65
   5  -7  -4  332.05   11.69
   6  -7  -4  466.92   16.71
  -6   7   4  476.97   16.01
   6  -7  -4  467.55   16.57
   7  -7  -4   68.10    3.55
   7  -7  -4   68.30    3.58
  -7   7   4   62.95    3.26
   8  -7  -4    1.69    1.16
  -8   7   4    1.45    0.86
   8  -7  -4    1.45    1.10
   9  -7  -4    2.64    1.22
   9  -7  -4    1.44    1.27
  -9   7   4    2.01    0.96
  10  -7  -4    2.52    1.47
  11  -7  -4    1.26    1.56
 -12  -6  -4    1.14    1.30
 -12  -6  -4   -1.15    1.12
  12   6   4    0.54    1.12
 -11  -6  -4    2.97    1.28
  11   6   4    0.70    0.97
 -11  -6  -4   -0.02    1.10
  10   6   4    2.29    0.99
 -10  -6  -4    1.14    1.07
 -10  -6  -4    0.09    1.01
   9   6   4    0.48    0.82
  -9  -6  -4    0.58    0.88
  -9  -6  -4   -0.48    0.80
  -8  -6  -4   26.65    1.93
  -8  -6  -4   25.49    2.25
  -8  -6  -4   24.73    1.97
   8   6   4   25.89    1.85
  -7  -6  -4   14.72    1.41
   7   6   4   12.49    1.16
  -7  -6  -4   11.79    1.54
  -7  -6  -4   13.46    1.35
  -7  -6  -4   13.14    1.24
   7   6   4   10.40    1.13
   6   6   4    2.23    0.96
  -6  -6  -4    4.63    0.85
   6   6   4    3.74    0.87
   6   6   4    3.98    0.76
   6   6   4    3.30    0.69
  -6  -6  -4    2.49    0.74
  -6  -6  -4    6.06    1.19
  -6  -6  -4    2.59    0.80
  -6  -6  -4    4.25    0.76
   5   6   4   76.67    3.17
  -5  -6  -4   75.39    3.15
   5   6   4   74.43    2.89
   5   6   4   75.12    2.93
   5   6   4   77.14    3.57
  -5  -6  -4   73.92    2.96
  -5  -6  -4   70.23    3.50
  -5  -6  -4   71.40    2.95
  -5  -6  -4   77.00    3.15
  -4  -6  -4   23.94    1.40
   4   6   4   25.03    1.18
   4   6   4   26.66    1.79
   4   6   4   27.60    1.48
   4   6   4   25.49    1.21
  -4  -6  -4   23.77    1.20
  -4  -6  -4   25.69    1.22
  -4  -6  -4   26.22    1.41
  -3  -6  -4    1.14    0.38
   3   6   4    1.32    0.46
   3   6   4    1.76    0.67
  -3  -6  -4    2.01    0.43
  -2  -6  -4  127.42    4.44
   2   6   4  127.16    4.96
   1   6   4   21.88    1.36
   0  -6  -4   26.00    1.09
   0  -6  -4   25.97    1.10
  -1   6   4    1.56    0.40
  -1   6   4    1.77    0.27
   1  -6  -4    1.24    0.30
  -1   6   4    1.84    0.26
   1  -6  -4    1.33    0.34
   1  -6  -4    1.55    0.34
   2  -6  -4   16.18    1.05
  -2   6   4   19.23    1.18
   2  -6  -4   15.63    1.04
  -2   6   4   18.71    0.98
   2  -6  -4   16.22    1.06
   2  -6  -4   19.80    1.09
  -2   6   4   15.03    0.92
   3  -6  -4  143.48    5.24
   3  -6  -4  142.32    5.18
  -3   6   4  139.43    5.23
  -3   6   4  137.69    4.99
   3  -6  -4  137.42    5.16
  -3   6   4  134.77    4.93
   3  -6  -4  136.46    5.23
   4  -6  -4  317.04   11.06
  -4   6   4  312.52   10.65
  -4   6   4  317.46   11.05
  -4   6   4  310.94   10.59
   4  -6  -4  298.38   11.02
   4  -6  -4  310.07   10.97
  -5   6   4   18.55    1.69
  -5   6   4   21.19    1.66
  -5   6   4   21.98    1.52
   5  -6  -4   21.96    1.72
   5  -6  -4   21.73    1.81
   5  -6  -4   20.51    1.63
   5  -6  -4   18.28    1.71
   6  -6  -4  155.28    6.25
  -6   6   4  153.16    5.89
   6  -6  -4  158.07    6.26
  -6   6   4  148.91    6.20
   6  -6  -4  149.13    6.20
   7  -6  -4   21.41    1.93
  -7   6   4   17.99    1.55
  -7   6   4   18.70    1.84
   7  -6  -4   18.37    1.82
  -8   6   4    6.65    1.12
   8  -6  -4    7.78    1.44
   8  -6  -4    6.19    1.36
  -9   6   4    6.45    1.24
   9  -6  -4    6.71    1.44
   9  -6  -4    7.95    1.60
  -9   6   4    5.84    1.22
  10  -6  -4    2.35    1.43
  11  -6  -4   -0.63    1.56
  12  -6  -4    2.41    1.85
 -13  -5  -4    3.03    1.62
 -12  -5  -4    3.73    1.52
 -12  -5  -4    2.54    1.39
  11   5   4    6.44    1.36
 -11  -5  -4    6.11    1.43
 -11  -5  -4    3.39    1.36
 -10  -5  -4   -0.87    0.98
  10   5   4   -0.77    0.77
 -10  -5  -4   -0.89    0.85
   9   5   4    0.69    0.81
  -9  -5  -4   -0.33    0.90
  -9  -5  -4   -1.09    0.86
  -9  -5  -4    0.18    0.91
  -8  -5  -4    1.14    0.86
   8   5   4    2.15    0.80
  -8  -5  -4    2.47    0.95
  -8  -5  -4    0.81    0.99
  -7  -5  -4   14.07    1.41
  -7  -5  -4   15.29    1.46
   7   5   4   15.64    1.49
   7   5   4   14.47    1.31
   7   5   4   13.08    1.25
  -7  -5  -4   15.69    1.45
  -7  -5  -4   11.59    1.53
  -6  -5  -4   31.58    1.84
  -6  -5  -4   30.40    1.89
  -6  -5  -4   33.92    1.85
   6   5   4   30.94    1.70
   6   5   4   30.39    1.73
  -6  -5  -4   33.91    1.94
   6   5   4   33.03    2.02
   6   5   4   34.77    2.16
  -6  -5  -4   29.97    2.11
  -5  -5  -4    0.15    0.53
  -5  -5  -4    0.28    0.70
  -5  -5  -4    0.92    0.54
  -5  -5  -4    0.49    0.47
   5   5   4    0.35    0.55
   5   5   4    0.88    0.48
   5   5   4    0.52    0.42
   5   5   4    0.96    0.64
  -5  -5  -4    0.67    0.54
   4   5   4   26.06    1.65
   4   5   4   25.81    1.44
  -4  -5  -4   23.35    1.34
  -4  -5  -4   21.45    1.23
  -4  -5  -4   23.74    1.32
   4   5   4   23.70    1.17
  -4  -5  -4   24.42    1.26
   4   5   4   22.56    1.16
   3   5   4   93.08    3.24
   3   5   4   96.74    3.53
  -3  -5  -4   97.03    3.50
   3   5   4   94.52    3.24
  -3  -5  -4   91.06    3.47
  -3  -5  -4   90.41    3.35
  -3  -5  -4   95.66    3.39
   3   5   4   95.73    3.92
  -2  -5  -4  248.02    8.54
   2   5   4  253.87    8.54
   2   5   4  247.25    8.98
  -2  -5  -4  254.16    8.56
  -1  -5  -4  528.80   18.10
  -1  -5  -4  545.91   18.08
   1   5   4  541.27   17.96
   0   5   4  234.64    7.99
   0  -5  -4  236.39    8.00
   0  -5  -4  240.27    8.00
   0  -5  -4  225.77    7.99
   1  -5  -4  422.82   14.27
   1  -5  -4  412.89   14.17
  -1   5   4  429.90   14.24
  -1   5   4  389.99   13.72
   1  -5  -4  423.57   14.17
  -1   5   4  433.29   13.75
   1  -5  -4  440.12   14.28
   2  -5  -4  118.74    4.56
   2  -5  -4  135.00    4.59
  -2   5   4  131.91    4.40
  -2   5   4  127.28    4.60
  -2   5   4  116.66    4.33
   2  -5  -4  119.94    4.57
   2  -5  -4  118.32    4.52
   3  -5  -4   52.71    2.35
   3  -5  -4   54.43    2.37
  -3   5   4   51.74    2.37
  -3   5   4   49.76    2.19
  -3   5   4   51.98    2.16
   3  -5  -4   48.48    2.30
   4  -5  -4   72.40    3.33
   4  -5  -4   73.21    3.35
   4  -5  -4   85.33    3.44
  -4   5   4   69.36    3.13
  -4   5   4   87.16    3.50
   4  -5  -4   84.97    3.44
   5  -5  -4   64.78    3.10
   5  -5  -4   62.73    3.04
   5  -5  -4   63.92    3.05
   5  -5  -4   65.16    3.04
  -5   5   4   64.77    2.80
  -5   5   4   61.06    3.01
  -5   5   4   61.22    2.86
  -6   5   4   55.39    2.65
   6  -5  -4   53.89    2.91
   6  -5  -4   50.02    2.85
  -6   5   4   60.39    2.82
  -6   5   4   49.85    2.86
   7  -5  -4    5.53    1.15
   7  -5  -4    2.21    1.07
  -7   5   4    4.99    0.95
  -7   5   4    5.62    1.15
  -8   5   4    2.33    1.05
   8  -5  -4    1.09    1.04
  -8   5   4    0.97    0.76
   8  -5  -4   -0.17    0.89
  -9   5   4    1.79    0.89
  -9   5   4    4.25    1.32
  -9   5   4    1.51    1.05
   9  -5  -4    3.93    1.31
   9  -5  -4    6.20    1.49
 -10   5   4   -0.41    0.81
  10  -5  -4   -0.04    1.23
  11  -5  -4    2.73    1.60
  12  -5  -4    5.78    2.00
 -13  -4  -4    3.52    1.55
 -12  -4  -4    0.77    1.27
 -12  -4  -4    2.29    1.36
  11   4   4    1.39    1.02
 -11  -4  -4   -0.37    1.07
 -11  -4  -4    0.42    1.11
  10   4   4    3.06    1.04
 -10  -4  -4    1.46    1.11
 -10  -4  -4    5.68    1.31
  -9  -4  -4   15.66    1.66
  -9  -4  -4   15.02    1.80
  -9  -4  -4   14.91    1.64
   9   4   4   15.34    1.53
  -8  -4  -4    2.82    1.10
   8   4   4    1.89    0.82
   8   4   4    2.20    1.00
  -8  -4  -4    2.81    1.03
  -8  -4  -4    1.98    0.91
  -7  -4  -4    0.48    0.83
  -7  -4  -4   -0.19    0.69
  -7  -4  -4   -0.78    0.74
   7   4   4    0.03    0.67
   7   4   4   -0.83    0.81
   7   4   4    0.11    0.67
   7   4   4   -0.92    0.58
  -7  -4  -4   -0.82    0.67
  -7  -4  -4   -0.15    0.76
   6   4   4   21.50    1.43
  -6  -4  -4   23.31    1.58
  -6  -4  -4   24.52    1.65
  -6  -4  -4   21.56    1.71
   6   4   4   25.63    1.78
  -6  -4  -4   21.05    1.59
   6   4   4   22.50    1.73
  -6  -4  -4   15.15    1.38
   6   4   4   22.34    1.40
   5   4   4    3.11    0.59
  -5  -4  -4    3.50    0.70
   5   4   4    4.28    0.81
  -5  -4  -4    1.54    0.42
  -5  -4  -4    3.36    0.67
   5   4   4    3.92    0.76
   5   4   4    4.29    0.61
  -5  -4  -4    3.47    0.70
  -4  -4  -4  125.81    4.81
  -4  -4  -4  129.87    4.79
   4   4   4  130.34    5.14
  -4  -4  -4  132.81    4.86
  -4  -4  -4  120.31    4.72
   4   4   4  128.63    4.58
   4   4   4  139.14    4.61
   4   4   4  132.65    4.90
   3   4   4   16.65    1.04
   3   4   4   17.48    0.85
  -3  -4  -4   18.29    0.99
  -3  -4  -4   16.83    0.99
  -3  -4  -4   15.85    0.95
   3   4   4   15.78    1.19
  -3  -4  -4   15.58    0.91
   3   4   4   17.02    0.84
   2   4   4    8.39    0.53
  -2  -4  -4   12.34    0.70
  -1  -4  -4  969.22   31.85
  -1  -4  -4  966.83   31.96
  -1  -4  -4  944.13   31.98
   1   4   4  956.91   31.83
   1   4   4  931.49   31.14
  -1  -4  -4  961.73   31.90
   1   4   4  990.69   31.19
   0  -4  -4  198.92    7.03
   0  -4  -4  219.28    7.11
   0   4   4  198.00    6.78
   0   4   4  212.06    7.10
   0  -4  -4  206.95    7.05
   0   4   4  204.87    6.78
   0  -4  -4  198.89    7.07
  -1   4   4  220.91    7.67
   1  -4  -4  230.28    7.96
  -1   4   4  237.28    7.67
  -1   4   4  228.78    8.00
   1  -4  -4  235.88    8.00
   1  -4  -4  223.50    7.93
   1  -4  -4  240.13    8.01
   1  -4  -4  227.32    7.99
  -2   4   4    6.34    0.64
  -2   4   4    7.47    0.66
   2  -4  -4    7.73    0.78
  -2   4   4    9.98    0.87
   2  -4  -4    7.36    0.71
   2  -4  -4    8.69    0.78
   2  -4  -4    7.58    0.75
  -2   4   4    9.52    0.71
   3  -4  -4    1.53    0.51
   3  -4  -4    0.84    0.50
   3  -4  -4    0.74    0.46
  -3   4   4    1.00    0.42
   3  -4  -4    0.64    0.51
  -3   4   4    0.57    0.50
  -3   4   4    1.53    0.43
  -3   4   4    1.80    0.50
  -4   4   4  256.69    8.77
  -4   4   4  247.87    8.68
   4  -4  -4  256.49    8.59
   4  -4  -4  266.80    9.14
   4  -4  -4  243.49    9.09
   4  -4  -4  254.21    9.10
  -4   4   4  250.39    9.11
  -4   4   4  252.42    8.97
   4  -4  -4  238.24    9.02
   5  -4  -4    2.63    0.70
  -5   4   4    2.41    0.66
   5  -4  -4    3.31    0.83
   5  -4  -4    2.13    0.64
   5  -4  -4    3.45    0.65
  -5   4   4    3.14    0.70
   5  -4  -4    2.66    0.78
  -5   4   4    1.98    0.77
  -5   4   4    2.83    0.65
   6  -4  -4    2.37    0.78
   6  -4  -4    1.86    0.80
  -6   4   4    2.09    0.84
   6  -4  -4    1.68    0.71
   6  -4  -4    2.42    0.71
  -6   4   4    1.88    0.68
  -6   4   4    3.35    0.81
   6  -4  -4    1.36    0.82
  -6   4   4    3.24    0.79
  -7   4   4    4.63    1.16
  -7   4   4    4.54    0.93
   7  -4  -4    5.35    1.18
   7  -4  -4    5.30    1.14
   8  -4  -4    0.25    1.03
  -8   4   4    0.45    0.93
  -8   4   4    0.96    0.77
   8  -4  -4    1.24    0.92
  -9   4   4    9.36    1.61
   9  -4  -4    7.59    1.48
  -9   4   4    7.30    1.45
   9  -4  -4    6.59    1.51
 -10   4   4    0.82    1.17
  10  -4  -4    0.40    1.32
 -10   4   4    1.70    0.98
  11  -4  -4    1.35    1.49
  12  -4  -4    1.04    1.69
 -13  -3  -4   -1.25    1.25
 -12  -3  -4   -0.86    1.18
 -11  -3  -4    1.18    1.10
  11   3   4   -0.16    0.91
 -11  -3  -4   -0.58    1.06
 -10  -3  -4    2.37    1.17
 -10  -3  -4    3.06    1.17
 -10  -3  -4    1.39    1.09
  10   3   4    2.07    1.00
  -9  -3  -4    0.62    0.92
   9   3   4    1.21    0.80
  -9  -3  -4   -1.66    0.90
  -9  -3  -4    1.72    0.97
   9   3   4    0.60    0.99
   8   3   4   17.12    1.51
   8   3   4   17.63    1.77
  -8  -3  -4   16.41    1.63
  -8  -3  -4   19.40    1.80
  -8  -3  -4   14.19    1.55
  -7  -3  -4   10.59    1.30
  -7  -3  -4    9.36    1.21
  -7  -3  -4    9.66    1.18
   7   3   4   11.38    1.25
   7   3   4    9.11    1.06
   7   3   4    8.23    1.04
  -7  -3  -4    8.89    1.19
  -7  -3  -4    9.13    1.12
   7   3   4   10.92    1.31
   7   3   4    7.34    0.99
  -6  -3  -4   28.88    1.84
  -6  -3  -4   28.54    1.84
   6   3   4   28.62    1.72
   6   3   4   30.09    1.90
  -6  -3  -4   30.83    1.88
  -6  -3  -4   29.63    1.86
  -6  -3  -4   29.70    1.94
   6   3   4   29.74    1.96
   6   3   4   30.91    1.72
   6   3   4   27.23    1.65
  -5  -3  -4  224.31    8.11
   5   3   4  227.28    8.16
   5   3   4  228.56    7.78
   5   3   4  232.74    8.35
  -5  -3  -4  215.49    8.03
   5   3   4  220.81    7.97
  -5  -3  -4  226.11    8.09
  -5  -3  -4  226.10    8.12
   5   3   4  217.71    7.74
   4   3   4  314.79   10.95
   4   3   4  313.14   10.50
   4   3   4  306.16   10.79
   4   3   4  318.86   11.19
   4   3   4  320.39   10.52
  -4  -3  -4  311.97   10.92
  -4  -3  -4  322.73   10.95
  -4  -3  -4  309.65   10.85
   3   3   4   42.55    1.77
   3   3   4   41.64    1.71
   3   3   4   43.74    1.74
  -3  -3  -4   42.83    1.88
   3   3   4   44.77    2.09
  -3  -3  -4   42.68    1.85
   3   3   4   43.68    1.95
  -3  -3  -4   42.82    1.87
   2   3   4    0.59    0.35
  -2  -3  -4    0.10    0.25
   2   3   4    1.70    0.27
   2   3   4    0.32    0.22
  -2  -3  -4    0.61    0.28
  -2  -3  -4    0.93    0.32
   2   3   4    1.65    0.29
  -2  -3  -4    0.83    0.28
   1   3   4  141.07    4.97
  -1  -3  -4  133.17    4.92
   1   3   4  140.71    4.86
   1   3   4  141.87    4.73
  -1  -3  -4  141.49    4.94
  -1  -3  -4  138.61    4.93
   1   3   4  138.95    4.70
  -1  -3  -4  141.75    4.91
   0   3   4  285.14    9.46
   0  -3  -4  268.68    9.08
   0  -3  -4  287.64    9.53
   0   3   4  282.35    9.46
   0   3   4  286.92    9.55
   0  -3  -4  267.50    9.52
   0   3   4  277.27    9.18
   0   3   4  276.78    9.16
   0  -3  -4  273.19    9.48
  -1   3   4 1710.67   56.08
   1  -3  -4 1716.30   56.12
  -1   3   4 1670.73   54.36
  -1   3   4 1719.32   54.36
   1  -3  -4 1638.51   55.93
   1  -3  -4 1668.28   54.30
  -1   3   4 1701.59   55.98
   1  -3  -4 1712.70   56.17
   2  -3  -4  446.33   15.06
  -2   3   4  435.53   15.04
  -2   3   4  443.24   14.99
   2  -3  -4  440.97   14.44
   2  -3  -4  445.60   15.08
  -2   3   4  450.17   14.51
  -2   3   4  439.19   15.07
   2  -3  -4  446.12   15.03
   2  -3  -4  431.63   15.00
  -2   3   4  434.94   14.55
   3  -3  -4   73.46    3.11
  -3   3   4   74.35    3.04
  -3   3   4   74.18    2.90
  -3   3   4   72.90    3.15
   3  -3  -4   74.71    2.88
  -3   3   4   75.24    2.98
   3  -3  -4   78.84    3.18
   3  -3  -4   70.01    3.07
  -4   3   4   -0.04    0.37
   4  -3  -4   -0.02    0.47
   4  -3  -4    0.16    0.41
   4  -3  -4    0.83    0.49
   4  -3  -4   -0.65    0.33
   4  -3  -4    0.16    0.40
  -4   3   4   -0.20    0.49
  -4   3   4    0.23    0.41
   4  -3  -4   -0.04    0.40
  -4   3   4    0.00    0.42
   5  -3  -4   40.67    2.09
  -5   3   4   43.55    2.12
  -5   3   4   38.00    2.32
   5  -3  -4   44.71    2.14
  -5   3   4   44.66    2.26
   5  -3  -4   43.15    2.34
   5  -3  -4   42.41    2.34
  -5   3   4   43.69    2.24
   5  -3  -4   46.25    2.38
   5  -3  -4   42.80    2.30
  -6   3   4   12.20    1.27
  -6   3   4   12.18    1.36
  -6   3   4   11.74    1.20
   6  -3  -4   11.90    1.37
  -6   3   4   12.02    1.15
   6  -3  -4    9.22    1.21
   6  -3  -4   12.49    1.28
   6  -3  -4   11.43    1.16
   6  -3  -4   10.34    1.29
  -7   3   4   11.16    1.48
  -7   3   4   14.52    1.35
   7  -3  -4   13.57    1.53
   7  -3  -4   11.39    1.53
  -8   3   4    0.36    0.77
   8  -3  -4   -0.72    1.02
   8  -3  -4   -1.02    0.90
  -8   3   4   -0.30    0.95
   9  -3  -4    0.89    1.18
  -9   3   4    2.31    1.21
  -9   3   4   -1.17    0.90
  10  -3  -4   -0.23    1.18
 -10   3   4   -1.63    1.08
  11  -3  -4   -0.50    1.28
 -11   3   4   -1.91    1.24
  12  -3  -4    4.08    1.84
 -13  -2  -4    0.93    1.47
 -12  -2  -4   -0.43    1.29
 -11  -2  -4    0.71    1.17
 -11  -2  -4   -0.55    1.18
 -10  -2  -4    2.05    1.22
  10   2   4    0.67    1.25
 -10  -2  -4    3.34    1.22
 -10  -2  -4    1.76    1.21
  10   2   4    3.78    1.13
  -9  -2  -4   19.12    1.92
   9   2   4   21.00    2.16
   9   2   4   19.85    1.82
  -9  -2  -4   21.78    1.95
  -9  -2  -4   20.18    2.04
   8   2   4   78.53    3.63
  -8  -2  -4   78.99    3.88
  -8  -2  -4   82.42    3.93
   8   2   4   81.19    4.08
   8   2   4   87.91    3.91
  -8  -2  -4   80.01    3.93
  -7  -2  -4    6.58    1.06
   7   2   4    4.67    0.86
  -7  -2  -4    7.47    0.81
   7   2   4    6.13    1.15
   7   2   4    5.60    1.05
  -7  -2  -4    4.15    0.82
   7   2   4    6.23    0.92
   7   2   4    6.85    0.94
  -7  -2  -4    5.54    1.01
  -7  -2  -4    5.50    0.97
  -6  -2  -4    3.07    0.63
   6   2   4    2.72    0.78
  -6  -2  -4    2.65    0.72
  -6  -2  -4    1.68    0.77
   6   2   4    1.38    0.70
  -6  -2  -4    0.35    0.77
   6   2   4    2.58    0.92
   6   2   4    2.93    0.75
  -6  -2  -4    1.37    0.80
   6   2   4    2.73    0.74
   5   2   4   18.35    1.41
  -5  -2  -4   17.23    1.33
   5   2   4   23.10    1.34
  -5  -2  -4   20.04    1.44
   5   2   4   20.49    1.38
  -5  -2  -4   24.85    1.52
   5   2   4   20.64    1.56
  -5  -2  -4   21.40    1.21
   5   2   4   20.42    1.29
  -5  -2  -4   21.55    1.44
  -4  -2  -4  101.56    3.84
   4   2   4   95.39    3.91
   4   2   4   92.83    3.70
  -4  -2  -4  103.14    3.87
   4   2   4  102.75    3.64
  -4  -2  -4   91.96    3.76
   4   2   4   92.29    3.57
  -4  -2  -4   95.89    3.49
  -4  -2  -4   95.17    3.79
   4   2   4   97.68    3.86
   3   2   4    9.26    0.80
  -3  -2  -4   10.17    0.84
  -3  -2  -4    9.01    0.81
   3   2   4    8.14    0.67
   3   2   4    9.73    0.92
  -3  -2  -4    7.95    0.79
   3   2   4    9.39    0.89
  -3  -2  -4    9.34    0.68
  -3  -2  -4    8.46    0.88
   3   2   4    8.58    0.74
  -2  -2  -4   24.49    1.22
   2   2   4   21.31    1.25
  -2  -2  -4   26.44    1.23
  -2  -2  -4   26.00    1.29
   2   2   4   23.80    1.09
  -2  -2  -4   23.39    1.04
   2   2   4   23.78    1.13
  -2  -2  -4   22.52    1.18
   2   2   4   21.95    1.14
  -1  -2  -4    2.05    0.36
  -1  -2  -4    1.50    0.34
  -1  -2  -4    1.99    0.38
  -1  -2  -4    1.78    0.38
   1   2   4    2.44    0.42
   1   2   4    2.16    0.31
   1   2   4    1.64    0.32
   1   2   4    2.00    0.33
  -1  -2  -4    1.91    0.29
   0   2   4  385.94   12.90
   0   2   4  374.18   12.45
   0  -2  -4  394.48   12.90
   0  -2  -4  376.90   12.39
   0  -2  -4  373.34   12.89
   0  -2  -4  363.93   12.82
   0   2   4  384.20   12.86
   0   2   4  372.77   12.42
   0  -2  -4  388.44   12.90
   1  -2  -4   36.94    1.66
   1  -2  -4   35.97    1.52
   1  -2  -4   35.67    1.65
   1  -2  -4   36.48    1.72
  -1   2   4   37.20    1.59
  -1   2   4   35.70    1.52
  -1   2   4   37.33    1.74
  -1   2   4   34.75    1.61
   2  -2  -4  107.12    4.19
   2  -2  -4  107.41    4.18
   2  -2  -4  112.07    4.23
   2  -2  -4  112.33    3.97
  -2   2   4  109.60    3.97
  -2   2   4  112.65    4.05
  -2   2   4  111.90    4.27
  -2   2   4  105.93    4.14
   3  -2  -4  148.94    5.64
  -3   2   4  147.58    5.70
   3  -2  -4  151.37    5.69
   3  -2  -4  156.26    5.66
  -3   2   4  155.91    5.46
   3  -2  -4  145.29    5.62
  -3   2   4  152.80    5.62
  -3   2   4  157.98    5.38
   3  -2  -4  138.46    5.33
  -4   2   4   35.23    1.90
  -4   2   4   38.80    1.82
  -4   2   4   34.58    1.99
  -4   2   4   36.88    1.87
   4  -2  -4   37.78    1.98
   4  -2  -4   37.68    2.00
   4  -2  -4   33.96    1.93
  -5   2   4    1.98    0.59
  -5   2   4    1.71    0.57
   5  -2  -4    1.12    0.38
  -5   2   4    3.05    0.81
   5  -2  -4    3.07    0.74
  -5   2   4    2.92    0.71
   5  -2  -4    2.44    0.63
   5  -2  -4    2.64    0.77
   6  -2  -4    0.85    0.79
  -6   2   4   -0.08    0.72
   6  -2  -4    0.23    0.59
  -6   2   4    0.55    0.64
   6  -2  -4    0.26    0.65
  -6   2   4    0.26    0.55
   7  -2  -4    9.30    1.21
   7  -2  -4   10.81    1.48
  -7   2   4    9.27    1.39
  -7   2   4    9.70    1.15
  -7   2   4    9.75    1.29
   7  -2  -4    9.28    1.32
  -8   2   4    7.24    1.16
  -8   2   4    8.77    1.49
   8  -2  -4    7.17    1.44
   8  -2  -4    4.92    1.29
  -9   2   4   13.44    1.70
   9  -2  -4   15.34    1.93
  -9   2   4   11.54    1.78
 -10   2   4   -1.07    1.07
  10  -2  -4    0.04    1.12
 -11   2   4   -0.14    1.25
  11  -2  -4    1.31    1.45
 -12   2   4    1.26    1.57
  12  -2  -4   -0.25    1.55
 -14  -1  -4    2.05    1.73
 -13  -1  -4    0.88    1.58
 -12  -1  -4   -0.84    1.22
  11   1   4    6.26    1.80
 -11  -1  -4    3.69    1.50
 -11  -1  -4    4.86    1.31
 -10  -1  -4   30.18    2.58
 -10  -1  -4   30.50    2.58
 -10  -1  -4   33.22    2.54
  10   1   4   33.12    2.43
  10   1   4   30.60    2.87
   9   1   4    4.34    1.02
  -9  -1  -4    2.04    1.02
  -9  -1  -4    3.95    1.16
  -9  -1  -4    3.14    1.16
   9   1   4    3.58    1.30
  -8  -1  -4   15.58    1.58
   8   1   4   13.24    1.45
  -8  -1  -4   15.53    1.63
   8   1   4   17.00    1.49
  -8  -1  -4   12.21    1.54
   8   1   4   16.70    1.84
   8   1   4   14.15    1.50
  -8  -1  -4   14.81    1.39
   7   1   4   32.70    2.02
  -7  -1  -4   30.22    2.06
   7   1   4   33.14    2.02
  -7  -1  -4   33.76    1.82
   7   1   4   33.10    2.27
  -7  -1  -4   34.34    2.11
  -7  -1  -4   31.50    2.08
   7   1   4   33.20    1.99
  -7  -1  -4   32.08    2.01
   7   1   4   31.13    1.90
   6   1   4    3.44    0.71
  -6  -1  -4    1.89    0.57
  -6  -1  -4    3.54    0.80
   6   1   4    2.87    0.71
  -6  -1  -4    1.54    0.75
   6   1   4    1.28    0.83
   6   1   4    2.42    0.73
   6   1   4    1.48    0.64
  -6  -1  -4    1.57    0.69
   5   1   4  124.00    4.85
   5   1   4  121.67    4.89
   5   1   4  118.98    4.57
  -5  -1  -4  120.85    4.82
  -5  -1  -4  121.96    4.50
   5   1   4  124.80    4.63
  -5  -1  -4  123.11    4.85
   5   1   4  126.85    4.79
  -5  -1  -4  119.70    4.80
  -5  -1  -4  130.23    4.88
  -4  -1  -4  291.46    9.62
   4   1   4  294.02   10.14
  -4  -1  -4  274.98   10.00
   4   1   4  298.51    9.72
   4   1   4  290.42   10.12
   4   1   4  287.10    9.67
  -4  -1  -4  281.55   10.04
  -4  -1  -4  300.91   10.12
  -4  -1  -4  259.55   10.02
   4   1   4  284.87   10.02
  -3  -1  -4    8.45    0.70
   3   1   4    8.40    0.83
   3   1   4    7.28    0.66
  -3  -1  -4    8.13    0.77
   3   1   4    6.92    0.71
  -3  -1  -4    8.12    0.79
   3   1   4    7.31    0.72
  -3  -1  -4    7.81    0.76
   2   1   4  119.70    4.17
  -2  -1  -4  110.60    4.34
  -2  -1  -4  118.72    4.36
  -2  -1  -4  115.27    4.15
   2   1   4  117.75    4.34
   2   1   4  117.74    4.42
   2   1   4  120.00    4.21
  -2  -1  -4  127.84    4.46
  -2  -1  -4  120.23    4.12
  -1  -1  -4  132.47    4.90
   1   1   4  137.67    4.90
  -1  -1  -4  137.76    4.97
   1   1   4  137.78    4.77
   1   1   4  135.62    4.71
  -1  -1  -4  134.84    4.92
   1   1   4  134.24    4.91
   1   1   4  137.21    4.98
  -1  -1  -4  138.75    4.68
   0   1   4  151.94    4.98
   0  -1  -4  150.32    5.20
   0   1   4  142.86    5.10
   0  -1  -4  119.22    5.07
   0  -1  -4  141.58    5.13
   0  -1  -4  148.66    4.89
   0  -1  -4  138.52    5.11
   0   1   4  141.54    4.90
   0   1   4  140.74    5.11
   0   1   4  145.15    5.19
  -1   1   4   38.93    1.77
   1  -1  -4   39.13    1.82
   1  -1  -4   42.25    1.67
  -1   1   4   39.66    1.67
   1  -1  -4   40.96    1.83
  -1   1   4   40.66    1.81
  -1   1   4   37.52    1.86
   1  -1  -4   41.41    1.86
  -1   1   4   38.47    1.73
   1  -1  -4   38.64    1.80
   2  -1  -4  402.82   14.11
  -2   1   4  414.80   14.15
   2  -1  -4  430.84   14.19
   2  -1  -4  348.46   13.59
  -2   1   4  414.15   14.19
   2  -1  -4  404.43   14.15
   2  -1  -4  437.87   13.63
  -2   1   4  413.15   14.15
  -2   1   4  429.06   13.72
   2  -1  -4  421.40   14.18
  -2   1   4  416.62   13.64
  -3   1   4  449.38   15.80
   3  -1  -4  456.75   15.83
  -3   1   4  468.66   15.23
   3  -1  -4  452.40   15.78
  -3   1   4  452.80   15.87
  -3   1   4  449.82   15.87
  -3   1   4  470.27   15.34
   3  -1  -4  449.53   15.27
   3  -1  -4  485.74   15.88
  -4   1   4   18.36    1.27
   4  -1  -4   22.32    1.56
   4  -1  -4   23.24    1.41
   4  -1  -4   23.33    1.49
   4  -1  -4   20.19    1.37
  -4   1   4   22.53    1.58
  -4   1   4   24.14    1.52
   4  -1  -4   17.83    1.32
   5  -1  -4   46.30    2.38
  -5   1   4   50.10    2.34
  -5   1   4   48.55    2.65
   5  -1  -4   49.42    2.55
  -5   1   4   48.03    2.53
   5  -1  -4   52.60    2.66
  -6   1   4    3.22    0.79
   6  -1  -4    4.65    0.98
   6  -1  -4    5.17    0.96
   7  -1  -4   15.53    1.61
   7  -1  -4   16.02    1.53
  -7   1   4   14.94    1.53
  -7   1   4   14.63    1.41
  -7   1   4   14.42    1.67
   7  -1  -4   15.43    1.67
  -8   1   4    2.71    1.20
   8  -1  -4    2.13    1.19
   9  -1  -4    2.39    1.26
  -9   1   4    1.16    1.15
  -9   1   4    2.43    1.06
  10  -1  -4    0.11    1.27
 -10   1   4   -0.32    1.13
  11  -1  -4    4.91    1.71
 -11   1   4    2.74    1.54
 -12   1   4   -2.16    1.38
  12  -1  -4    0.70    1.55
 -14   0  -4   -0.44    1.55
 -13   0  -4    1.13    1.51
 -12   0  -4   -1.45    1.23
  12   0   4   -1.68    1.46
 -11   0  -4    2.91    1.15
 -11   0  -4    2.63    1.33
  11   0   4    2.33    1.54
 -10   0  -4    0.60    1.20
  10   0   4   -0.66    1.32
 -10   0  -4    0.22    1.07
  -9   0  -4   28.20    2.11
  -9   0  -4   28.66    2.27
   9   0   4   32.44    2.61
   9   0   4   29.95    1.95
   9   0   4   26.15    2.05
  -9   0  -4   25.00    2.22
  -8   0  -4   -0.01    0.30
   8   0   4    1.83    0.78
   8   0   4    0.06    0.66
  -8   0  -4    0.09    0.78
   8   0   4    0.35    0.65
  -8   0  -4    0.52    0.83
   8   0   4   -1.06    0.85
  -7   0  -4   -0.29    0.61
  -7   0  -4   -0.21    0.43
   7   0   4   -0.52    0.53
   7   0   4    0.11    0.56
  -7   0  -4    0.82    0.75
   7   0   4    0.31    0.81
  -7   0  -4    0.45    0.47
   7   0   4   -0.52    0.55
   7   0   4    0.19    0.52
   6   0   4   21.80    1.74
   6   0   4   24.71    1.55
  -6   0  -4   24.96    1.62
   6   0   4   20.02    1.48
   6   0   4   23.74    1.61
  -6   0  -4   23.30    1.64
  -6   0  -4   20.51    1.38
  -6   0  -4   21.78    1.63
   6   0   4   20.05    1.44
   5   0   4  846.88   29.46
   5   0   4  888.98   28.53
   5   0   4  899.64   29.58
  -5   0  -4  910.16   29.55
  -5   0  -4  852.72   29.48
  -5   0  -4  847.73   29.41
  -5   0  -4  856.23   28.46
   5   0   4  898.75   28.53
   5   0   4  859.62   29.49
  -4   0  -4  545.28   18.66
   4   0   4  561.14   18.04
   4   0   4  537.58   17.99
   4   0   4  560.14   18.68
   4   0   4  531.70   18.63
   4   0   4  543.12   18.69
  -4   0  -4  565.61   18.70
  -4   0  -4  531.20   18.59
  -4   0  -4  544.19   17.98
   3   0   4  192.68    7.08
  -3   0  -4  195.55    6.81
   3   0   4  209.51    7.12
   3   0   4  205.25    6.87
  -3   0  -4  205.71    7.14
  -3   0  -4  189.01    7.07
  -3   0  -4  202.15    6.78
   3   0   4  194.17    7.16
   3   0   4  192.71    6.80
  -3   0  -4  191.05    7.08
  -2   0  -4  414.64   15.20
   2   0   4  466.84   15.34
  -2   0  -4  471.94   15.32
  -2   0  -4  460.92   14.79
   2   0   4  431.13   14.71
  -2   0  -4  417.47   15.25
  -2   0  -4  443.01   14.71
  -2   0  -4  477.96   15.32
   2   0   4  470.45   14.81
   2   0   4  435.16   15.27
   2   0   4  451.57   15.27
  -1   0  -4   78.21    2.84
  -1   0  -4   75.09    2.87
   1   0   4   78.59    3.01
   1   0   4   75.70    3.08
   1   0   4   74.86    3.00
  -1   0  -4   76.89    3.02
  -1   0  -4   79.15    3.09
  -1   0  -4   75.99    3.00
  -1   0  -4   72.22    2.97
   1   0   4   74.33    2.83
   1   0   4   76.96    2.90
   0   0   4  409.51   13.72
   0   0  -4  426.77   13.73
   0   0  -4  405.95   14.24
   0   0  -4  400.90   14.19
   0   0   4  432.18   13.80
   0   0   4  408.45   14.26
   0   0  -4  414.86   13.78
   0   0   4  411.80   14.25
   0   0  -4  446.33   14.32
   0   0  -4  427.14   14.27
   0   0   4  412.15   14.23
  -1   0   4    2.36    0.47
   1   0  -4    0.92    0.38
  -1   0   4    0.87    0.35
   1   0  -4    2.47    0.43
  -1   0   4    0.78    0.37
   1   0  -4    0.72    0.41
   1   0  -4    1.24    0.39
   1   0  -4    0.58    0.38
  -1   0   4    0.32    0.35
  -1   0   4    0.90    0.46
  -1   0   4    1.39    0.37
   2   0  -4   68.37    2.65
   2   0  -4   64.57    2.84
   2   0  -4   66.48    2.84
   3   0  -4   27.02    1.66
  -3   0   4   25.74    1.79
  -3   0   4   29.75    1.68
   3   0  -4   28.40    1.57
  -3   0   4   28.92    1.52
   3   0  -4   28.49    1.61
  -3   0   4   26.01    1.58
  -3   0   4   27.27    1.66
   3   0  -4   29.39    1.54
  -3   0   4   29.77    1.69
  -3   0   4   28.43    1.84
   3   0  -4   26.84    1.74
   4   0  -4    2.07    0.61
   4   0  -4    2.65    0.73
   4   0  -4    3.00    0.68
   4   0  -4    2.69    0.61
  -4   0   4    2.84    0.59
   4   0  -4    2.79    0.57
  -4   0   4    3.16    0.70
  -4   0   4    3.39    0.62
  -4   0   4    3.29    0.78
   5   0  -4    8.93    1.23
  -5   0   4    9.07    1.19
   5   0  -4    9.75    1.11
   5   0  -4    9.53    1.18
  -5   0   4    9.48    1.04
  -5   0   4    6.84    1.15
  -6   0   4    7.36    1.12
   6   0  -4    8.10    1.25
   6   0  -4    6.64    1.14
  -6   0   4    7.21    0.99
   6   0  -4    5.93    1.02
  -6   0   4    8.39    1.31
  -7   0   4   54.16    3.21
   7   0  -4   55.73    2.92
  -7   0   4   53.41    3.03
   7   0  -4   57.95    3.22
  -8   0   4   -0.45    0.97
   8   0  -4    0.54    1.04
  -9   0   4   -0.54    1.05
   9   0  -4    0.32    1.13
 -10   0   4    1.53    1.32
  10   0  -4    4.26    1.49
 -11   0   4    2.42    1.55
  11   0  -4    4.31    1.70
 -12   0   4   -1.13    1.49
  13  -1   4   -1.45    1.59
 -13   1  -4   -0.50    1.46
  12  -1   4   -2.33    1.36
 -12   1  -4    0.33    1.27
  11  -1   4    3.98    1.70
 -11   1  -4    8.31    1.68
  10  -1   4   14.63    2.29
 -10   1  -4   16.68    2.10
  -9   1  -4    7.12    1.39
  -9   1  -4    6.84    1.30
   9  -1   4    7.14    1.19
   9  -1   4    9.00    1.62
   8  -1   4    0.67    0.76
  -8   1  -4   -0.52    0.77
   8  -1   4   -0.54    0.66
   8  -1   4   -0.19    1.08
   8  -1   4   -0.45    0.77
  -8   1  -4   -2.78    0.79
  -8   1  -4   -0.50    0.67
   7  -1   4    3.19    0.82
   7  -1   4    4.77    1.08
   7  -1   4    5.32    0.98
  -7   1  -4    5.04    0.85
  -7   1  -4    4.05    0.92
   7  -1   4    4.70    0.84
  -7   1  -4    4.44    1.00
   6  -1   4    5.48    1.02
  -6   1  -4    5.24    0.77
  -6   1  -4    4.56    0.90
   6  -1   4    3.39    0.71
  -6   1  -4    3.71    0.80
   6  -1   4    4.13    0.75
   6  -1   4    3.60    0.78
   5  -1   4  102.99    4.29
   5  -1   4  102.50    3.96
  -5   1  -4  103.55    3.97
  -5   1  -4  102.42    4.19
   5  -1   4   99.29    4.01
  -5   1  -4   96.81    4.15
   4  -1   4 1510.31   50.88
  -4   1  -4 1600.74   49.16
   4  -1   4 1585.57   49.21
   4  -1   4 1600.38   50.83
  -4   1  -4 1540.32   50.82
   4  -1   4 1479.06   50.80
  -4   1  -4 1524.79   49.17
  -4   1  -4 1486.97   50.64
  -4   1  -4 1504.01   50.79
   4  -1   4 1478.63   49.13
   4  -1   4 1454.16   50.69
  -3   1  -4  399.81   12.74
   3  -1   4  397.46   13.24
   3  -1   4  373.72   13.27
  -3   1  -4  383.14   13.23
   3  -1   4  368.76   12.70
  -3   1  -4  379.43   13.21
   3  -1   4  370.84   13.22
   3  -1   4  391.26   12.78
  -3   1  -4  375.62   13.18
  -3   1  -4  384.53   12.78
   2  -1   4  445.90   14.74
   2  -1   4  420.04   14.16
  -2   1  -4  431.53   14.68
  -2   1  -4  437.22   14.18
   2  -1   4  422.69   14.75
  -2   1  -4  426.93   14.71
   2  -1   4  414.64   14.71
  -2   1  -4  429.84   14.71
  -2   1  -4  417.89   14.21
   2  -1   4  449.36   14.25
  -1   1  -4  257.31    8.88
   1  -1   4  248.25    9.21
  -1   1  -4  273.67    8.84
  -1   1  -4  264.26    9.19
   1  -1   4  247.72    9.17
  -1   1  -4  258.66    9.16
  -1   1  -4  263.71    9.19
   1  -1   4  270.48    9.21
   1  -1   4  270.10    8.90
   1  -1   4  259.91    8.81
   1  -1   4  272.89    9.17
   0  -1   4   32.52    1.52
   0  -1   4   30.74    1.58
   0  -1   4   30.47    1.68
   0   1  -4   29.75    1.55
   0  -1   4   30.81    1.59
   0   1  -4   30.94    1.50
   0   1  -4   32.48    1.57
   0  -1   4   33.11    1.60
   0   1  -4   29.38    1.57
   0  -1   4   28.70    1.40
   0   1  -4   30.52    1.45
   1   1  -4   49.71    2.27
   1   1  -4   54.52    2.16
  -1  -1   4   49.82    2.31
   1   1  -4   51.87    2.34
  -1  -1   4   53.85    2.32
  -1  -1   4   50.39    2.38
   1   1  -4   49.69    2.20
  -2  -1   4  667.22   22.14
   2   1  -4  670.47   21.33
   2   1  -4  642.02   21.40
  -2  -1   4  655.48   22.15
   2   1  -4  633.91   22.08
  -2  -1   4  652.26   22.14
   2   1  -4  638.31   22.04
  -3  -1   4   25.48    1.82
   3   1  -4   29.61    1.70
  -3  -1   4   29.38    1.75
   3   1  -4   29.26    1.65
  -3  -1   4   26.82    1.83
   3   1  -4   27.40    1.73
  -3  -1   4   31.40    1.79
   3   1  -4   28.41    1.64
   3   1  -4   29.84    1.57
   4   1  -4    0.44    0.54
  -4  -1   4    0.89    0.66
   4   1  -4    0.05    0.44
  -4  -1   4    0.07    0.47
   4   1  -4    0.42    0.54
  -4  -1   4    1.06    0.72
  -4  -1   4    0.04    0.20
  -4  -1   4    0.71    0.62
   4   1  -4    0.62    0.63
   4   1  -4    0.31    0.51
   5   1  -4   16.83    1.52
   5   1  -4   17.01    1.58
  -5  -1   4   15.77    1.51
  -5  -1   4   15.51    1.53
   5   1  -4   12.08    1.54
   5   1  -4   15.40    1.48
  -5  -1   4   12.31    1.54
   6   1  -4    0.53    0.80
  -6  -1   4    2.53    0.94
   6   1  -4    1.15    0.96
  -6  -1   4    1.59    1.05
   6   1  -4    1.96    0.87
  -6  -1   4   -0.02    0.41
   7   1  -4   11.81    1.43
   7   1  -4   12.65    1.62
  -7  -1   4   15.42    1.59
  -7  -1   4   13.50    1.67
  -8  -1   4   15.88    1.77
  -8  -1   4   12.50    1.79
   8   1  -4   14.18    1.67
  -8  -1   4   11.73    1.61
   8   1  -4   14.02    1.81
   9   1  -4    2.64    1.34
  -9  -1   4    2.08    1.26
 -10  -1   4   -0.73    1.16
  10   1  -4    1.23    1.28
 -11  -1   4    1.60    1.55
 -12  -1   4    1.25    1.56
 -13   2  -4    0.65    1.54
  13  -2   4   -0.40    1.70
  12  -2   4    2.86    1.72
 -12   2  -4    1.30    1.47
 -11   2  -4    6.25    1.61
  11  -2   4    3.07    1.57
  10  -2   4    0.13    1.23
 -10   2  -4    0.47    1.16
  -9   2  -4   27.84    2.28
   9  -2   4   27.50    2.47
  -8   2  -4   -0.99    0.81
   8  -2   4   -0.76    1.02
   8  -2   4   -0.88    0.70
  -8   2  -4   -0.48    0.93
   8  -2   4   -1.08    0.84
  -8   2  -4   -1.06    0.76
   8  -2   4    0.12    0.78
  -7   2  -4    1.91    0.88
   7  -2   4    2.00    0.86
   7  -2   4    3.32    1.14
  -7   2  -4    2.38    0.97
   7  -2   4    1.30    0.69
  -6   2  -4   59.30    2.76
  -6   2  -4   63.30    2.98
   6  -2   4   63.08    2.79
   6  -2   4   57.76    2.63
   6  -2   4   58.84    3.10
   6  -2   4   58.49    2.95
  -6   2  -4   59.36    3.02
  -5   2  -4    4.77    0.78
  -5   2  -4    2.68    0.72
   5  -2   4    3.25    0.64
  -5   2  -4    3.94    0.87
  -5   2  -4    2.56    0.61
   5  -2   4    2.66    0.65
   5  -2   4    2.54    0.65
   5  -2   4    2.87    0.80
   5  -2   4    2.57    0.87
  -4   2  -4  424.58   14.14
   4  -2   4  441.57   14.69
  -4   2  -4  431.22   14.10
   4  -2   4  415.00   14.71
  -4   2  -4  417.56   14.61
   4  -2   4  419.00   14.41
  -4   2  -4  409.48   14.60
   4  -2   4  411.75   14.66
  -3   2  -4  305.88   10.86
   3  -2   4  295.34   10.91
   3  -2   4  308.72   10.93
  -3   2  -4  307.16   10.52
  -3   2  -4  317.15   10.47
  -3   2  -4  304.90   10.85
   3  -2   4  328.03   10.97
   2  -2   4   15.84    1.18
   1  -2   4  344.34   11.60
  -1   2  -4  338.62   11.18
  -1   2  -4  342.73   11.64
   1  -2   4  323.48   11.68
  -1   2  -4  331.41   11.59
  -1   2  -4  327.79   11.25
   1  -2   4  329.02   11.65
   1  -2   4  339.97   11.66
   0   2  -4    6.33    0.80
   0   2  -4    6.15    0.73
   0   2  -4    6.46    0.67
   0  -2   4    7.68    0.80
   0  -2   4    7.17    0.79
   0  -2   4    6.28    0.73
   0  -2   4    7.21    0.68
   0  -2   4    6.27    0.83
   0   2  -4    7.06    0.76
   1   2  -4    9.81    0.95
  -1  -2   4   11.15    1.03
  -1  -2   4   14.20    1.08
  -1  -2   4   10.22    1.01
   1   2  -4   10.93    0.88
  -1  -2   4   10.55    1.01
   1   2  -4   10.91    0.99
  -1  -2   4   11.57    0.86
   1   2  -4    8.66    0.85
   2   2  -4  157.98    5.95
  -2  -2   4  171.96    6.23
  -2  -2   4  162.60    5.80
   2   2  -4  170.73    5.89
  -2  -2   4  168.76    6.16
   2   2  -4  163.23    6.18
   2   2  -4  163.54    6.15
  -2  -2   4  162.84    6.26
  -2  -2   4  162.15    6.19
  -3  -2   4   44.73    2.05
   3   2  -4   43.38    2.25
  -3  -2   4   45.48    2.32
   3   2  -4   45.03    2.22
   3   2  -4   46.31    2.37
   3   2  -4   42.00    2.18
  -3  -2   4   42.15    2.37
  -3  -2   4   42.92    2.40
  -3  -2   4   49.49    2.37
   3   2  -4   49.73    2.18
   4   2  -4   32.73    2.07
  -4  -2   4   34.99    2.03
  -4  -2   4   30.75    2.11
  -4  -2   4   22.21    1.82
   4   2  -4   29.06    1.82
   4   2  -4   28.53    1.82
   4   2  -4   31.95    1.92
   4   2  -4   34.14    1.84
  -4  -2   4   27.50    1.87
  -4  -2   4   29.54    1.65
  -5  -2   4   14.15    1.66
   5   2  -4   14.68    1.57
   5   2  -4   17.51    1.62
   5   2  -4   19.15    1.71
  -5  -2   4   15.47    1.74
   5   2  -4   15.59    1.74
  -5  -2   4   20.77    1.91
  -5  -2   4   18.08    1.51
  -6  -2   4   79.77    4.06
   6   2  -4   79.97    3.99
   6   2  -4   77.90    3.74
  -6  -2   4   80.62    3.94
  -7  -2   4   23.37    2.01
  -7  -2   4   23.74    2.25
   7   2  -4   21.85    1.89
   7   2  -4   23.29    2.13
   8   2  -4    2.91    1.21
  -8  -2   4    1.57    1.04
  -8  -2   4    2.61    1.24
   8   2  -4    2.79    1.06
  -9  -2   4    1.33    1.22
   9   2  -4    2.92    1.35
 -10  -2   4    8.09    1.81
 -11  -2   4    0.91    1.47
  13  -3   4    1.01    1.73
 -13   3  -4   -1.34    1.40
 -12   3  -4    5.00    1.62
  12  -3   4    6.25    1.89
  11  -3   4    2.28    1.50
 -11   3  -4    1.74    1.31
  10  -3   4   18.11    2.21
 -10   3  -4   18.34    2.07
  -9   3  -4    4.07    1.25
   9  -3   4    6.90    1.51
  -8   3  -4   16.18    1.81
   8  -3   4   14.29    1.87
  -8   3  -4   15.11    1.54
   8  -3   4   12.89    1.62
   7  -3   4  122.36    5.29
   7  -3   4  122.08    4.70
  -7   3  -4  122.54    4.98
  -7   3  -4  118.10    5.25
   7  -3   4  126.99    5.45
  -7   3  -4  120.84    5.15
   6  -3   4    3.30    0.76
   6  -3   4    1.55    0.62
  -6   3  -4    2.67    0.76
   6  -3   4    3.26    0.84
  -6   3  -4    2.63    0.82
   6  -3   4    2.74    0.98
   6  -3   4    2.65    0.55
  -6   3  -4    2.18    0.86
  -6   3  -4    4.90    0.83
  -5   3  -4   19.53    1.66
   5  -3   4   22.65    1.69
   5  -3   4   22.01    1.72
   5  -3   4   21.21    1.47
   5  -3   4   16.95    1.76
  -5   3  -4   24.51    1.59
  -5   3  -4   21.15    1.65
  -5   3  -4   21.98    1.58
   5  -3   4   21.23    1.21
   4  -3   4  100.05    4.05
  -4   3  -4   94.44    3.99
  -4   3  -4   92.88    3.94
   4  -3   4   95.69    3.73
   4  -3   4   90.63    4.10
  -4   3  -4   96.50    3.84
   4  -3   4   94.53    3.59
   4  -3   4   93.53    4.03
  -4   3  -4   97.76    3.80
   3  -3   4   31.80    1.77
  -3   3  -4   31.59    1.65
  -3   3  -4   28.60    1.72
   3  -3   4   30.57    1.83
   3  -3   4   30.10    1.59
  -3   3  -4   29.85    1.68
  -3   3  -4   30.36    1.78
   3  -3   4   30.17    1.89
   3  -3   4   29.65    1.78
   2  -3   4  653.85   22.58
   2  -3   4  720.44   22.53
  -2   3  -4  661.43   22.47
  -2   3  -4  666.05   22.50
   2  -3   4  674.81   21.70
  -2   3  -4  635.50   21.80
  -2   3  -4  676.04   21.75
   2  -3   4  621.55   22.51
  -1   3  -4    0.31    0.62
   1  -3   4    0.46    0.53
  -1   3  -4    1.21    0.58
   1  -3   4    0.35    0.68
  -1   3  -4   -0.20    0.52
   1  -3   4    0.26    0.49
   1  -3   4    0.09    0.18
   1  -3   4    0.33    0.60
   0   3  -4    1.14    0.49
   0   3  -4    1.23    0.60
   0  -3   4    0.29    0.54
   0  -3   4    0.43    0.53
   0  -3   4    1.08    0.48
   0   3  -4    1.26    0.51
   0  -3   4    1.09    0.45
   0   3  -4    1.35    0.44
   0  -3   4    0.25    0.24
  -1  -3   4    6.09    0.85
  -1  -3   4    6.16    0.82
   1   3  -4    4.84    0.70
   1   3  -4    5.43    0.75
   1   3  -4    5.69    0.68
  -1  -3   4    5.76    0.64
   1   3  -4    4.99    0.78
  -1  -3   4    6.01    0.75
   2   3  -4   17.87    1.28
   2   3  -4   16.09    1.15
   2   3  -4   14.64    1.34
   2   3  -4   18.12    1.29
   3   3  -4   19.12    1.45
   3   3  -4   19.08    1.34
  -3  -3   4   19.33    1.68
  -3  -3   4   19.64    1.56
  -3  -3   4   21.94    1.49
  -3  -3   4   20.85    1.28
  -3  -3   4   17.99    1.62
   3   3  -4   20.80    1.45
   3   3  -4   19.99    1.45
   3   3  -4   18.52    1.55
   4   3  -4    4.29    0.76
  -4  -3   4    2.05    0.73
   4   3  -4    3.78    0.92
   4   3  -4    5.69    0.91
   5   3  -4   50.73    2.83
  -5  -3   4   55.85    3.09
   5   3  -4   51.79    3.05
  -5  -3   4   56.02    3.20
  -5  -3   4   53.70    3.06
   6   3  -4   52.26    3.06
  -6  -3   4   45.70    2.86
   6   3  -4   49.18    2.76
  -6  -3   4   46.92    3.07
  -7  -3   4   79.24    4.21
  -7  -3   4   83.87    4.23
   7   3  -4   82.56    3.99
   7   3  -4   80.48    4.17
  -7  -3   4   86.53    4.38
  -8  -3   4    1.24    1.23
   8   3  -4    1.68    1.05
  -8  -3   4    1.85    1.06
  -9  -3   4    4.35    1.43
 -10  -3   4   -0.40    1.25
 -11  -3   4   -0.58    1.28
  13  -4   4    0.31    1.73
  12  -4   4    0.08    1.62
  11  -4   4    1.98    1.57
 -11   4  -4   -0.05    1.22
  10  -4   4   -2.19    1.21
 -10   4  -4   -0.60    1.13
   9  -4   4    0.60    0.98
   9  -4   4   -0.47    1.08
  -9   4  -4    0.14    1.01
   8  -4   4    0.20    0.93
  -8   4  -4    1.45    0.91
   8  -4   4   -0.13    1.11
  -8   4  -4    1.17    1.09
  -7   4  -4   52.02    2.69
   7  -4   4   49.15    3.07
   7  -4   4   49.18    2.92
  -7   4  -4   45.28    2.85
  -6   4  -4   -0.72    0.71
   6  -4   4   -0.66    0.54
  -6   4  -4    0.68    0.70
   6  -4   4   -0.24    0.35
   6  -4   4    0.03    0.74
  -6   4  -4   -0.06    0.70
   6  -4   4   -1.03    0.82
  -5   4  -4   29.60    1.87
   5  -4   4   28.80    1.97
  -5   4  -4   27.30    1.78
   5  -4   4   27.53    1.92
  -5   4  -4   28.34    1.78
  -5   4  -4   30.58    1.96
   5  -4   4   25.08    2.04
   5  -4   4   28.50    1.34
   5  -4   4   27.32    1.67
   4  -4   4   20.27    1.72
  -4   4  -4   24.95    1.56
   4  -4   4   21.80    1.40
   4  -4   4   24.85    1.17
   4  -4   4   16.34    1.45
   4  -4   4   22.38    1.65
  -4   4  -4   24.68    1.54
  -4   4  -4   22.92    1.67
  -4   4  -4   23.82    1.58
   3  -4   4    4.38    0.76
  -3   4  -4    3.80    0.84
  -3   4  -4    4.59    0.79
   3  -4   4    3.57    0.66
   3  -4   4    3.19    0.81
   3  -4   4    2.66    0.86
  -3   4  -4    4.42    0.71
  -3   4  -4    4.04    0.75
  -2   4  -4   45.88    2.18
  -2   4  -4   45.65    2.28
   2  -4   4   46.14    2.06
   2  -4   4   48.23    2.35
   2  -4   4   45.98    2.46
   2  -4   4   43.80    2.32
  -2   4  -4   46.71    2.25
  -2   4  -4   49.71    2.40
   2  -4   4   45.47    2.38
   1  -4   4  237.82    8.39
  -1   4  -4  229.42    8.24
   1  -4   4  238.13    8.32
   1  -4   4  230.08    7.84
  -1   4  -4  231.11    7.97
  -1   4  -4  225.17    8.30
  -1   4  -4  228.31    8.07
   1  -4   4  224.60    8.37
   1  -4   4  219.21    8.35
   0  -4   4  203.29    7.46
   0   4  -4  209.07    7.55
   0   4  -4  200.90    7.29
   0   4  -4  203.12    7.46
   0  -4   4  208.18    7.59
   0   4  -4  208.07    7.19
   0  -4   4  208.50    7.58
   0  -4   4  197.43    7.56
  -1  -4   4   85.60    3.44
  -1  -4   4   79.79    3.47
  -1  -4   4   73.42    3.38
   1   4  -4   76.11    3.39
   1   4  -4   81.11    3.20
   1   4  -4   74.54    3.27
  -1  -4   4   74.67    3.46
   1   4  -4   77.42    3.29
   2   4  -4    4.83    0.84
  -2  -4   4    3.99    0.78
   2   4  -4    4.84    0.89
  -2  -4   4    4.60    0.83
   2   4  -4    4.64    0.74
   2   4  -4    5.04    0.78
  -2  -4   4    5.23    0.99
  -2  -4   4    4.17    0.84
   3   4  -4   11.42    1.24
  -3  -4   4   11.42    1.23
  -3  -4   4   11.73    1.37
   3   4  -4   12.61    1.22
  -3  -4   4   10.38    1.22
  -3  -4   4   14.14    1.32
   3   4  -4   11.10    1.16
   3   4  -4   10.33    1.04
  -3  -4   4   11.80    1.34
   4   4  -4   31.07    2.07
  -4  -4   4   39.34    2.43
   4   4  -4   34.07    2.00
   4   4  -4   32.94    2.11
   4   4  -4   34.20    2.24
  -4  -4   4   36.36    2.25
  -5  -4   4   25.94    2.08
  -5  -4   4   23.57    2.00
   5   4  -4   25.29    1.90
  -5  -4   4   24.81    2.14
   5   4  -4   22.36    1.82
   5   4  -4   22.75    2.04
  -6  -4   4   28.55    2.17
   6   4  -4   26.85    2.32
  -6  -4   4   29.57    2.49
  -6  -4   4   28.32    2.27
   6   4  -4   24.86    2.04
  -7  -4   4    3.82    1.42
  -7  -4   4    7.69    1.44
   7   4  -4    7.81    1.33
   8   4  -4    1.86    1.04
  -8  -4   4    2.64    1.17
  -8  -4   4   -0.02    1.16
  -9  -4   4    0.75    1.26
 -10  -4   4   -0.10    1.36
 -11  -4   4   -0.20    1.43
  12  -5   4    0.82    1.75
  11  -5   4    2.56    1.63
  10  -5   4   -2.32    1.22
   9  -5   4    2.40    1.22
  -9   5  -4    2.37    1.26
   9  -5   4    3.54    1.46
   8  -5   4    1.29    1.09
  -8   5  -4    1.56    0.94
   8  -5   4    1.30    1.21
  -8   5  -4    1.03    1.05
   7  -5   4   29.02    2.33
   7  -5   4   31.56    2.52
  -7   5  -4   34.50    2.21
  -7   5  -4   32.01    2.34
   6  -5   4    5.78    1.20
  -6   5  -4    3.86    0.98
   6  -5   4    4.04    1.26
  -6   5  -4    6.68    1.21
   5  -5   4    0.39    0.75
   5  -5   4   -0.28    0.38
   5  -5   4    1.12    0.91
  -5   5  -4    0.52    0.78
  -5   5  -4    0.79    0.70
  -4   5  -4    4.93    0.80
   4  -5   4    5.22    0.97
  -4   5  -4    5.33    0.90
  -4   5  -4    6.83    1.02
   4  -5   4    5.94    0.90
   4  -5   4    5.23    0.93
   4  -5   4    5.64    1.06
  -4   5  -4    4.41    0.84
   3  -5   4   15.87    1.51
  -3   5  -4   18.26    1.53
  -3   5  -4   16.36    1.29
   3  -5   4   15.51    1.43
  -3   5  -4   16.05    1.33
   3  -5   4   15.62    1.41
   3  -5   4   17.90    1.44
  -3   5  -4   16.24    1.29
  -2   5  -4    0.30    0.62
  -2   5  -4    0.84    0.53
   2  -5   4    0.87    0.68
   2  -5   4    1.37    0.64
  -2   5  -4    1.94    0.64
   2  -5   4    2.49    0.73
   2  -5   4    2.68    0.82
  -1   5  -4   17.43    1.39
  -1   5  -4   18.10    1.54
  -1   5  -4   17.66    1.29
   1  -5   4   17.11    1.48
   1  -5   4   19.26    1.61
   1  -5   4   20.52    1.54
   1  -5   4   19.16    1.51
   0   5  -4   94.17    3.97
   0   5  -4   98.69    3.76
   0  -5   4   94.78    4.02
   0  -5   4   95.97    3.96
   0   5  -4   89.73    3.82
   0  -5   4   93.36    4.02
   0  -5   4   89.68    4.00
   1   5  -4   80.73    3.54
   1   5  -4   81.18    3.33
   1   5  -4   78.10    3.42
  -1  -5   4   76.16    3.57
  -1  -5   4   84.88    3.56
  -1  -5   4   82.48    3.61
  -1  -5   4   74.54    3.54
   2   5  -4    9.71    1.17
   2   5  -4    9.47    1.01
   2   5  -4    9.08    1.08
  -3  -5   4   29.95    2.11
  -3  -5   4   28.10    2.02
  -3  -5   4   26.60    2.10
   3   5  -4   27.74    2.02
  -3  -5   4   30.73    2.07
   3   5  -4   29.05    1.90
   3   5  -4   31.30    1.80
  -4  -5   4    2.72    1.03
   4   5  -4    3.74    1.00
  -4  -5   4    1.82    0.92
   5   5  -4    5.93    1.10
  -5  -5   4    3.02    1.07
  -5  -5   4    5.68    1.17
  -5  -5   4    5.77    1.27
  -5  -5   4    5.45    1.22
   5   5  -4    4.97    1.09
  -6  -5   4    4.25    1.26
   6   5  -4    4.64    1.09
  -6  -5   4    3.57    1.11
  -6  -5   4    3.67    1.30
   6   5  -4    3.51    1.09
   7   5  -4    9.87    1.49
  -7  -5   4   10.34    1.61
   7   5  -4   10.83    1.57
  -7  -5   4   11.35    1.81
  -8  -5   4    1.00    1.13
  -8  -5   4   -1.19    1.22
   8   5  -4    0.22    1.00
  -9  -5   4    2.74    1.48
 -10  -5   4    0.03    1.37
  12  -6   4    0.58    1.83
  11  -6   4   -0.49    1.51
  10  -6   4    4.53    1.69
   9  -6   4    5.88    1.49
   9  -6   4    6.57    1.58
   8  -6   4   30.29    2.61
   8  -6   4   29.19    2.48
  -8   6  -4   27.81    2.19
  -7   6  -4   -0.38    0.78
   7  -6   4    0.06    1.00
   7  -6   4   -1.44    0.98
  -6   6  -4   10.72    1.35
   6  -6   4   11.58    1.60
  -6   6  -4   13.81    1.55
   6  -6   4   11.92    1.52
  -5   6  -4   27.56    1.96
   5  -6   4   32.12    2.20
   5  -6   4   34.13    2.32
  -5   6  -4   32.59    2.21
   4  -6   4   16.10    1.63
  -4   6  -4   16.46    1.62
  -4   6  -4   13.24    1.37
   4  -6   4   14.99    1.51
   4  -6   4   14.89    1.53
  -3   6  -4    0.24    0.63
   3  -6   4    0.97    0.75
   3  -6   4    0.66    0.75
   3  -6   4    0.58    0.83
  -3   6  -4    1.09    0.77
  -3   6  -4    0.44    0.60
  -2   6  -4    5.45    0.93
   2  -6   4    4.14    0.88
   2  -6   4    3.05    0.91
   2  -6   4    3.73    0.88
  -2   6  -4    3.51    0.78
   2  -6   4    4.23    0.89
  -2   6  -4    3.58    0.72
  -1   6  -4    2.01    0.74
   1  -6   4    2.91    0.86
   1  -6   4    2.28    0.75
  -1   6  -4    2.43    0.69
  -1   6  -4    3.24    0.86
   1  -6   4    2.14    0.86
   1  -6   4    2.12    0.75
   0   6  -4   34.88    2.02
   0   6  -4   33.31    2.14
   0  -6   4   32.81    2.02
   0  -6   4   36.91    2.17
   0   6  -4   36.40    1.94
   0  -6   4   31.90    2.13
   0  -6   4   35.44    2.14
  -1  -6   4    0.89    0.78
   1   6  -4   -0.36    0.71
  -1  -6   4   -0.04    0.71
  -1  -6   4    1.08    0.69
   1   6  -4    2.17    0.69
   1   6  -4    1.05    0.69
   2   6  -4    1.65    0.70
  -2  -6   4    2.75    0.83
  -2  -6   4    1.95    0.84
   2   6  -4    1.52    0.80
  -2  -6   4    1.51    0.86
  -2  -6   4    2.15    1.01
  -3  -6   4    3.37    1.17
  -3  -6   4    5.57    1.19
  -3  -6   4    4.48    1.02
   3   6  -4    4.88    1.02
  -3  -6   4    4.43    1.10
   4   6  -4    0.17    0.75
  -4  -6   4   -0.12    0.82
  -4  -6   4   -0.49    0.78
  -4  -6   4    0.56    0.84
  -5  -6   4   12.03    1.57
   5   6  -4   16.44    1.64
  -5  -6   4   17.99    1.85
   5   6  -4   17.56    1.71
  -5  -6   4   17.75    1.84
  -5  -6   4   14.74    1.67
  -6  -6   4    0.35    0.88
   6   6  -4    0.47    0.91
   6   6  -4    0.60    0.84
  -6  -6   4   -0.40    1.10
   7   6  -4    0.85    1.05
  -7  -6   4    1.49    1.27
  -7  -6   4    0.21    1.03
   7   6  -4    1.56    1.04
   8   6  -4    8.62    1.55
   8   6  -4    7.27    1.52
  -8  -6   4    9.28    1.84
  -8  -6   4    5.16    1.49
  -9  -6   4    3.99    1.58
  11  -7   4    0.33    1.55
  10  -7   4   -0.30    1.38
   9  -7   4    3.28    1.56
   9  -7   4    1.16    1.30
   8  -7   4   -0.09    1.08
   8  -7   4   -1.53    1.11
  -8   7  -4   -0.72    0.82
  -7   7  -4   16.87    1.73
   7  -7   4   16.18    1.87
   7  -7   4   19.01    2.05
   6  -7   4    1.91    1.18
   6  -7   4    2.09    1.06
  -6   7  -4    2.76    1.00
   5  -7   4   -0.74    0.84
   5  -7   4    2.49    1.11
  -5   7  -4    0.99    0.86
   4  -7   4   16.16    1.72
  -4   7  -4   19.64    1.69
   4  -7   4   19.13    1.91
   3  -7   4   17.22    1.69
  -3   7  -4   16.11    1.52
   3  -7   4   16.51    1.68
  -2   7  -4   18.42    1.53
   2  -7   4   17.18    1.65
   2  -7   4   19.32    1.71
   2  -7   4   19.02    1.77
   2  -7   4   16.65    1.07
   1  -7   4    5.16    1.04
   1  -7   4    5.53    1.01
  -1   7  -4    4.52    0.95
   1  -7   4    5.94    1.12
   1  -7   4    5.74    0.76
   0  -7   4   33.09    2.22
   0   7  -4   34.78    2.09
   0  -7   4   35.30    2.23
   0  -7   4   30.94    1.83
   0  -7   4   33.69    2.19
  -1  -7   4   22.51    1.84
  -1  -7   4   21.96    1.89
  -1  -7   4   19.96    1.57
   1   7  -4   22.35    1.73
  -2  -7   4    4.46    0.97
  -2  -7   4    5.77    1.16
   2   7  -4    6.01    1.06
  -2  -7   4    6.37    1.26
  -3  -7   4    0.73    0.84
   3   7  -4    0.32    0.81
  -3  -7   4   -0.01    0.89
  -3  -7   4    0.21    0.88
   4   7  -4    2.27    0.97
  -4  -7   4    3.27    1.10
  -4  -7   4    1.85    0.97
  -4  -7   4    2.45    0.99
   5   7  -4    2.12    1.02
  -5  -7   4    3.50    1.20
  -5  -7   4    0.89    1.06
   6   7  -4    1.01    0.94
  -6  -7   4    0.63    1.05
   6   7  -4    1.02    0.99
  -6  -7   4   -0.31    1.06
  -6  -7   4    0.91    1.02
   7   7  -4    0.68    1.07
  -7  -7   4   -0.73    0.96
  -7  -7   4    1.21    1.17
   7   7  -4    0.43    0.96
   8   7  -4    0.13    1.09
   8   7  -4    2.78    1.27
  -8  -7   4    1.01    1.29
  -8  -7   4    0.12    1.15
  -9  -7   4    0.51    1.40
  11  -8   4   -0.13    1.65
  10  -8   4   -0.20    1.48
   9  -8   4    6.14    1.69
   9  -8   4    2.35    1.58
  -8   8  -4    3.98    1.25
   8  -8   4    1.15    1.23
   8  -8   4    1.72    1.40
   7  -8   4    0.18    1.08
   7  -8   4    0.19    1.19
  -7   8  -4   -0.89    0.93
   6  -8   4    2.40    1.20
   6  -8   4    1.31    1.07
  -6   8  -4    1.55    1.00
   5  -8   4    2.99    1.18
  -5   8  -4    3.67    1.12
   5  -8   4    2.27    1.18
  -4   8  -4    4.66    1.18
   4  -8   4    6.14    1.35
   4  -8   4    2.51    1.14
   3  -8   4    1.43    0.99
   3  -8   4    1.11    1.03
  -3   8  -4    2.44    1.02
  -2   8  -4    3.51    1.00
   2  -8   4    3.69    1.06
   2  -8   4    5.17    1.15
   1  -8   4   18.26    1.78
   1  -8   4   18.61    1.78
  -1   8  -4   19.39    1.69
   0   8  -4    4.29    1.04
   0  -8   4    5.09    0.89
   0  -8   4    6.98    1.23
   0  -8   4    4.33    1.06
   1   8  -4   12.71    1.40
  -1  -8   4   11.96    1.46
  -1  -8   4   12.19    1.28
  -1  -8   4   12.52    1.47
   2   8  -4    3.82    1.03
  -2  -8   4    1.88    1.01
  -2  -8   4    2.41    1.00
  -2  -8   4    1.13    0.84
  -2  -8   4    2.44    0.98
  -3  -8   4   11.49    1.57
   3   8  -4   12.99    1.52
  -3  -8   4   11.51    1.48
  -3  -8   4   10.52    1.44
  -4  -8   4    3.93    1.07
  -4  -8   4    3.15    1.14
  -4  -8   4    4.20    1.23
   4   8  -4    3.78    1.13
  -5  -8   4    0.01    1.09
   5   8  -4    0.88    0.94
  -5  -8   4   -0.02    1.04
  -6  -8   4   -0.49    1.03
  -6  -8   4   -1.17    1.08
   6   8  -4   -0.72    0.90
  -6  -8   4   -1.21    0.97
  -7  -8   4    1.50    1.24
  -7  -8   4    0.72    1.20
   7   8  -4    0.87    1.16
  -8  -8   4    1.06    1.30
  -8  -8   4    1.81    1.35
  10  -9   4    0.01    1.51
   9  -9   4    1.22    1.49
   9  -9   4    0.65    1.41
  -8   9  -4    5.26    1.44
   8  -9   4    5.75    1.73
   8  -9   4    4.32    1.56
   7  -9   4    1.18    1.26
   7  -9   4   -0.11    1.28
  -7   9  -4   -1.13    1.04
  -6   9  -4    4.20    1.25
   6  -9   4    2.92    1.39
   6  -9   4    3.14    1.31
   5  -9   4    1.27    1.15
  -5   9  -4    0.54    1.00
   5  -9   4    2.97    1.25
   4  -9   4    1.92    1.18
   4  -9   4    0.68    1.07
  -4   9  -4    1.29    1.03
   3  -9   4    1.08    1.07
  -3   9  -4    2.19    1.08
   3  -9   4    1.67    1.14
  -2   9  -4   -0.10    0.82
   2  -9   4    0.12    0.88
   2  -9   4   -1.25    0.81
   1  -9   4   -0.35    0.83
   1  -9   4   -1.48    0.76
  -1   9  -4    0.96    0.89
   0  -9   4   -0.66    0.84
   0  -9   4    0.16    0.87
   0   9  -4    0.70    0.86
  -1  -9   4    1.47    1.03
  -1  -9   4    2.07    0.99
   1   9  -4    2.33    0.97
  -2  -9   4    3.19    1.14
  -2  -9   4    1.57    0.98
   2   9  -4    4.01    1.10
  -3  -9   4    0.06    0.87
  -3  -9   4   -0.06    1.00
   3   9  -4    1.06    0.97
  -4  -9   4    7.43    1.49
   4   9  -4    7.13    1.35
  -4  -9   4   10.11    1.48
  -5  -9   4    1.71    1.14
  -5  -9   4    0.79    1.23
  -5  -9   4    1.46    1.10
   5   9  -4    1.66    1.10
  -6  -9   4    0.24    1.07
  -6  -9   4    1.81    1.27
   6   9  -4    1.41    1.09
  -7  -9   4    3.52    1.32
   7   9  -4    3.76    1.37
  -7  -9   4    1.66    1.37
   9 -10   4    0.38    1.54
   8 -10   4   -0.04    1.31
  -8  10  -4    1.71    1.27
   8 -10   4   -0.13    1.28
   7 -10   4   -0.66    1.31
  -7  10  -4    0.15    1.25
   7 -10   4    2.95    1.47
   6 -10   4    1.20    1.33
   6 -10   4    0.53    1.21
  -6  10  -4   -0.23    0.99
   5 -10   4    5.89    1.44
  -5  10  -4    4.08    1.32
   5 -10   4    6.58    1.51
   4 -10   4    2.93    1.32
   4 -10   4    4.37    1.27
  -4  10  -4    1.59    1.10
   3 -10   4    3.48    1.28
   3 -10   4    1.48    1.13
  -3  10  -4    4.33    1.24
   2 -10   4   -0.20    1.02
  -2  10  -4    0.21    0.96
   2 -10   4   -1.10    0.92
  -1  10  -4   -1.19    0.83
   1 -10   4    0.36    0.97
   1 -10   4   -0.17    0.99
   0  10  -4    3.59    1.13
   0 -10   4    4.01    1.19
   0 -10   4    4.15    1.18
   1  10  -4   -0.44    0.88
  -1 -10   4    1.32    1.03
  -1 -10   4   -0.60    0.92
  -1 -10   4    1.48    0.90
  -2 -10   4    0.91    0.92
   2  10  -4    0.26    0.95
  -2 -10   4    1.42    1.10
   3  10  -4    0.20    0.95
  -3 -10   4    0.99    1.09
  -3 -10   4    0.98    0.96
   4  10  -4    4.21    1.31
  -4 -10   4    4.87    1.49
  -4 -10   4    5.05    1.28
  -5 -10   4   -0.01    1.16
  -5 -10   4    0.12    1.16
  -5 -10   4   -0.42    1.36
   5  10  -4   -0.34    1.09
   7 -11   4   -0.84    1.29
  -7  11  -4    0.25    1.28
   7 -11   4   -1.32    1.30
   6 -11   4    0.12    1.18
  -6  11  -4    1.09    1.12
   6 -11   4   -0.24    1.29
   5 -11   4    1.18    1.20
   5 -11   4    1.86    1.27
  -5  11  -4    2.19    1.18
   4 -11   4    2.86    1.22
   4 -11   4    2.61    1.29
  -4  11  -4    1.01    1.08
   3 -11   4    5.72    1.39
  -3  11  -4    3.16    1.23
   3 -11   4    3.75    1.19
   2 -11   4    5.18    1.38
  -2  11  -4    6.59    1.36
   2 -11   4    9.11    1.39
  -1  11  -4   -0.05    0.95
   1 -11   4   -0.75    1.02
   1 -11   4    0.78    0.99
   0 -11   4    2.23    0.98
   0  11  -4    1.53    1.08
   0 -11   4    1.28    1.04
   0 -11   4    1.96    1.21
  -1 -11   4    0.88    1.16
  -1 -11   4   -0.93    0.81
   1  11  -4    0.80    1.03
  -2 -11   4    2.53    0.98
  -2 -11   4    2.01    1.18
   2  11  -4    1.86    1.21
  -3 -11   4    0.79    0.96
  -3 -11   4    1.98    1.25
   3  11  -4   -0.82    0.94
  -4 -11   4    6.21    1.63
  -4 -11   4    5.62    1.21
   4 -12   4    0.47    1.22
   4 -12   4    0.82    1.01
  -4  12  -4    0.27    1.08
   3 -12   4    1.37    1.07
   3 -12   4   -0.17    1.12
  -3  12  -4   -0.16    1.05
   2 -12   4    1.38    1.18
  -2  12  -4    0.25    1.09
   2 -12   4    1.15    0.98
   1 -12   4    0.88    0.85
   1 -12   4    1.30    1.15
  -1  12  -4   -1.41    1.04
   1 -12   4   -0.09    0.90
   0 -12   4   -1.75    0.68
   0  12  -4   -0.92    0.98
   0 -12   4   -0.31    1.11
  -1 -12   4   -0.16    0.77
   1  12  -4    0.53    1.09
  -1 -12   4   -0.41    1.01
  -1  15   5    0.52    0.63
  -1  15   5    0.29    0.58
  -2  15   5   -0.25    0.61
   2 -15  -5    0.54    0.64
   2 -15  -5   -1.10    0.63
  -3  15   5    3.75    0.87
   3 -15  -5    2.09    0.88
   5  14   5   -0.46    0.57
  -1  14   5    3.66    0.64
   2 -14  -5    0.57    0.70
   2 -14  -5    0.90    0.66
  -2  14   5    0.10    0.57
  -2  14   5    0.59    0.60
  -3  14   5    0.55    0.67
   3 -14  -5   -0.86    0.71
   3 -14  -5    0.59    0.79
  -4  14   5    1.60    0.80
   4 -14  -5    2.28    0.96
  -5  14   5   -0.55    0.78
   5 -14  -5    1.35    0.93
   7  13   5    1.72    0.85
  -7 -13  -5    2.63    0.95
  -6 -13  -5    9.52    1.19
   6  13   5   10.09    1.12
  -6 -13  -5   11.29    1.26
   5  13   5    1.49    0.56
  -5 -13  -5    3.01    0.73
   5  13   5    1.08    0.60
  -5 -13  -5    2.24    0.72
   1 -13  -5    0.49    0.50
  -2  13   5    3.24    0.70
  -2  13   5    4.17    0.77
   2 -13  -5    3.52    0.81
   2 -13  -5    4.28    0.85
   3 -13  -5    2.19    0.82
  -3  13   5    2.02    0.77
   3 -13  -5    2.05    0.77
  -3  13   5    1.60    0.63
   4 -13  -5    1.14    0.85
  -4  13   5    2.03    0.75
   5 -13  -5    0.03    0.87
  -5  13   5   -0.17    0.69
  -6  13   5    0.12    0.78
   6 -13  -5   -0.49    0.86
   7 -13  -5    0.68    1.15
  -7  13   5   -0.66    0.89
   7 -13  -5    0.26    0.70
  -8 -12  -5   -0.77    0.78
   8  12   5    0.26    0.76
   7  12   5    2.69    0.88
  -7 -12  -5    3.19    0.98
  -6 -12  -5    2.94    0.91
  -6 -12  -5    3.58    0.89
   6  12   5    3.76    0.75
   6  12   5    4.10    0.81
   5  12   5    1.33    0.52
  -5 -12  -5    1.94    0.68
   5  12   5    0.47    0.54
  -5 -12  -5    2.02    0.75
   1 -12  -5    2.19    0.56
   1 -12  -5    2.22    0.58
  -2  12   5    8.62    0.86
   2 -12  -5    8.68    0.99
  -2  12   5    8.57    0.85
   2 -12  -5    9.34    0.98
  -3  12   5    0.39    0.54
   3 -12  -5   -0.22    0.62
  -3  12   5    0.35    0.58
   3 -12  -5    1.23    0.70
   4 -12  -5    1.01    0.78
   4 -12  -5   -0.07    0.72
  -4  12   5   -0.13    0.60
  -5  12   5    3.37    0.88
   5 -12  -5    1.49    0.95
   6 -12  -5   -0.90    0.67
  -6  12   5   -0.35    0.73
   6 -12  -5   -0.10    0.97
  -7  12   5   -1.75    0.81
   7 -12  -5    0.54    0.93
   7 -12  -5   -1.59    1.03
   8 -12  -5    0.10    1.27
   8 -12  -5   -0.13    1.07
  -8  12   5   -1.02    0.84
  -9 -11  -5    0.90    0.94
   9  11   5    0.71    0.85
  -8 -11  -5    0.25    0.83
   8  11   5    1.60    0.80
  -7 -11  -5   -0.79    0.72
   7  11   5    0.25    0.66
  -7 -11  -5   -1.01    0.73
   6  11   5    0.48    0.57
  -6 -11  -5   -0.81    0.64
  -6 -11  -5   -0.06    0.66
   6  11   5    0.05    0.50
  -5 -11  -5   21.36    1.48
   5  11   5   21.15    1.26
   5  11   5   20.80    1.26
  -5 -11  -5   20.13    1.44
  -4 -11  -5    1.71    0.61
  -4 -11  -5    2.42    0.62
   2  11   5    9.19    1.19
   1  11   5   11.57    1.33
   1 -11  -5   19.80    1.24
   1 -11  -5   19.35    1.22
   2 -11  -5   36.60    1.85
  -2  11   5   34.39    1.67
   2 -11  -5   32.59    1.81
  -2  11   5   32.83    1.63
   3 -11  -5   13.18    1.21
   3 -11  -5   10.96    1.12
  -3  11   5    9.49    1.00
  -3  11   5   11.41    1.03
  -4  11   5    0.08    0.60
  -4  11   5    0.12    0.59
   4 -11  -5    0.23    0.73
   4 -11  -5    1.00    0.72
  -5  11   5    0.31    0.63
   5 -11  -5   -0.73    0.54
   5 -11  -5   -0.19    0.75
   6 -11  -5    0.89    0.96
  -6  11   5    0.81    0.79
   6 -11  -5    1.56    0.85
  -7  11   5    9.00    1.32
   7 -11  -5    7.50    1.36
   7 -11  -5    8.72    1.52
   8 -11  -5    0.95    1.15
   8 -11  -5    0.44    1.07
  -8  11   5    0.86    0.99
  -9  11   5   -0.47    0.96
   9 -11  -5    1.30    1.21
   9 -11  -5   -2.13    1.05
 -10 -10  -5    0.45    1.05
 -10 -10  -5   -0.55    0.73
  10  10   5    1.19    1.02
   9  10   5    0.49    0.82
  -9 -10  -5   -0.32    0.57
  -9 -10  -5   -0.29    0.92
  -8 -10  -5    3.91    1.05
   8  10   5    3.44    0.91
   7  10   5   -0.19    0.63
  -7 -10  -5    0.21    0.75
  -7 -10  -5   -0.37    0.66
  -6 -10  -5    0.31    0.72
  -6 -10  -5   -0.13    0.69
   6  10   5    0.41    0.60
   6  10   5    1.13    0.61
  -5 -10  -5    0.13    0.55
   5  10   5    0.07    0.39
   5  10   5    0.01    0.46
  -5 -10  -5   -0.10    0.56
  -4 -10  -5    0.97    0.52
  -4 -10  -5    0.00    0.47
   3  10   5    1.84    0.83
   2  10   5   28.28    1.98
   1  10   5    2.23    0.76
   0  10   5    4.98    0.89
   1 -10  -5    0.51    0.44
  -1  10   5    0.51    0.61
   1 -10  -5    0.26    0.46
  -2  10   5  108.93    3.99
   2 -10  -5  110.39    4.24
  -2  10   5  113.28    4.38
  -2  10   5  104.50    4.00
   2 -10  -5  107.99    4.23
  -3  10   5    9.01    0.92
   3 -10  -5    8.25    1.01
  -3  10   5    9.35    0.92
   3 -10  -5    8.39    1.02
   4 -10  -5    0.29    0.49
  -4  10   5    0.01    0.56
   4 -10  -5    0.02    0.64
   4 -10  -5    1.55    0.73
   4 -10  -5    0.57    0.58
  -4  10   5   -0.27    0.56
  -5  10   5    0.22    0.64
   5 -10  -5   -0.55    0.66
   5 -10  -5   -0.42    0.75
   6 -10  -5    2.24    0.94
   6 -10  -5    3.07    1.03
  -6  10   5    2.17    0.86
  -7  10   5   -0.28    0.87
   7 -10  -5   -0.04    1.01
   7 -10  -5    0.45    0.97
   8 -10  -5    1.22    1.11
  -8  10   5    0.38    0.90
   8 -10  -5    1.97    1.22
  -9  10   5    0.90    1.05
   9 -10  -5   -2.59    1.03
   9 -10  -5   -1.32    1.30
  10 -10  -5    0.57    1.34
  10 -10  -5   -0.07    1.41
 -11  -9  -5    6.75    1.37
 -11  -9  -5    6.42    1.56
  11   9   5    5.23    1.35
  10   9   5    0.16    0.90
 -10  -9  -5    1.36    0.94
 -10  -9  -5    2.11    1.15
  -9  -9  -5    0.41    0.72
   9   9   5    0.04    0.76
  -9  -9  -5    0.72    0.89
  -8  -9  -5    0.11    0.78
  -8  -9  -5   -0.14    0.57
   8   9   5    0.37    0.65
  -7  -9  -5    0.16    0.71
   7   9   5    0.06    0.61
   7   9   5    0.28    0.62
  -7  -9  -5    1.45    0.80
   6   9   5    0.45    0.57
  -6  -9  -5    0.52    0.69
  -6  -9  -5    0.73    0.71
   6   9   5    0.69    0.60
   5   9   5   44.54    1.97
  -5  -9  -5   43.62    2.18
   5   9   5   45.85    2.03
  -5  -9  -5   46.56    2.24
  -4  -9  -5   83.99    3.28
  -4  -9  -5   81.48    3.24
   3   9   5   11.52    1.30
   2   9   5    1.59    0.77
   1   9   5   12.79    1.27
   0   9   5   13.31    1.18
  -1   9   5    2.94    0.70
   1  -9  -5    4.26    0.57
   1  -9  -5    4.99    0.60
   2  -9  -5    2.62    0.61
  -2   9   5    2.31    0.52
   2  -9  -5    2.13    0.58
  -2   9   5    2.71    0.51
  -3   9   5   23.56    1.36
   3  -9  -5   20.84    1.23
   3  -9  -5   21.60    1.52
   3  -9  -5   26.01    1.54
   3  -9  -5   21.63    1.28
  -3   9   5   20.74    1.42
   4  -9  -5   49.75    2.58
   4  -9  -5   49.66    2.39
   4  -9  -5   49.80    2.60
  -4   9   5   53.89    2.54
  -4   9   5   48.24    2.37
   4  -9  -5   50.86    2.40
  -5   9   5   39.15    2.21
   5  -9  -5   39.58    2.40
   5  -9  -5   44.13    2.36
   5  -9  -5   41.31    2.45
  -6   9   5    0.32    0.77
   6  -9  -5   -0.66    0.77
   6  -9  -5   -0.97    0.74
  -7   9   5    3.21    0.99
   7  -9  -5    2.90    1.17
   7  -9  -5    2.04    1.08
   8  -9  -5    0.84    1.17
   8  -9  -5   -0.38    0.93
  -8   9   5   -0.47    0.85
  -9   9   5    1.09    1.07
   9  -9  -5   -0.55    1.15
   9  -9  -5   -1.02    1.23
  10  -9  -5    6.50    1.76
  10  -9  -5    5.90    1.82
 -12  -8  -5    1.35    1.21
 -11  -8  -5    1.43    1.22
  11   8   5    1.51    1.04
 -11  -8  -5    3.71    1.32
  10   8   5    0.49    0.90
 -10  -8  -5    1.13    1.07
 -10  -8  -5   -0.35    1.00
   9   8   5    0.63    0.82
  -9  -8  -5    1.28    0.93
  -9  -8  -5   -0.37    0.82
   8   8   5   -0.12    0.67
  -8  -8  -5   -0.29    0.76
  -8  -8  -5    0.42    0.74
   7   8   5    2.76    0.76
   7   8   5    0.88    0.68
  -7  -8  -5    2.36    0.64
  -7  -8  -5    1.99    0.82
  -7  -8  -5    0.85    0.78
  -6  -8  -5   37.68    1.64
  -6  -8  -5   33.58    2.08
  -6  -8  -5   33.89    2.06
   6   8   5   32.84    1.85
   6   8   5   37.04    1.91
   5   8   5  124.19    4.53
  -5  -8  -5  133.69    4.89
   5   8   5  119.65    4.54
  -5  -8  -5  127.38    4.85
   4   8   5  378.62   12.64
   4   8   5  366.92   12.60
  -4  -8  -5  377.87   13.19
   4   8   5  411.02   14.04
  -4  -8  -5  398.10   13.23
  -3  -8  -5  398.49   13.42
  -3  -8  -5  389.00   13.41
   3   8   5  401.87   14.19
   2   8   5   74.37    3.39
   1   8   5    3.73    0.74
   0   8   5   37.89    2.01
   0  -8  -5   39.43    1.59
   0  -8  -5   37.52    1.57
  -1   8   5   14.98    0.79
   1  -8  -5   15.61    0.99
   1  -8  -5   13.80    0.95
  -2   8   5   42.34    1.83
   2  -8  -5   39.31    1.97
  -2   8   5   44.50    2.00
   2  -8  -5   42.06    1.99
   2  -8  -5   40.70    1.72
  -2   8   5   42.21    1.81
  -3   8   5   39.58    1.99
   3  -8  -5   39.11    1.91
  -3   8   5   38.88    1.85
   3  -8  -5   37.58    1.89
   3  -8  -5   37.96    2.03
   3  -8  -5   38.37    2.05
  -4   8   5   19.85    1.49
   4  -8  -5   26.81    1.74
  -4   8   5   28.29    1.72
   4  -8  -5   22.27    1.72
   4  -8  -5   22.04    1.69
   4  -8  -5   31.43    1.77
   5  -8  -5   25.60    1.93
  -5   8   5   23.95    1.67
  -5   8   5   25.78    1.84
   5  -8  -5   26.07    1.91
   5  -8  -5   26.23    1.89
  -6   8   5    2.61    0.90
   6  -8  -5    4.87    1.13
   6  -8  -5    4.35    1.11
  -7   8   5    1.51    0.85
   7  -8  -5   -0.14    0.88
   7  -8  -5    0.72    1.06
   8  -8  -5   -0.57    0.99
  -8   8   5    0.09    0.79
   8  -8  -5   -0.45    1.07
   9  -8  -5    6.29    1.58
   9  -8  -5    7.74    1.71
  -9   8   5    5.42    1.30
  10  -8  -5    1.51    1.58
  11  -8  -5    3.38    1.78
 -12  -7  -5    1.40    1.22
 -12  -7  -5   -0.05    1.22
  12   7   5   -0.43    0.98
  11   7   5    2.77    1.14
 -11  -7  -5    2.47    1.27
 -11  -7  -5    2.01    1.27
  10   7   5   10.15    1.49
 -10  -7  -5   12.89    1.71
 -10  -7  -5   15.59    1.69
   9   7   5    0.75    0.80
  -9  -7  -5   -0.04    0.80
  -9  -7  -5   -0.90    0.78
  -8  -7  -5    1.39    0.95
  -8  -7  -5    1.92    1.02
   8   7   5    2.36    0.88
  -7  -7  -5    2.32    0.93
   7   7   5    3.05    0.82
   7   7   5    0.74    0.77
  -7  -7  -5    1.65    0.91
   6   7   5   25.32    1.54
  -6  -7  -5   24.67    1.68
  -6  -7  -5   25.85    1.51
  -6  -7  -5   24.88    1.50
  -6  -7  -5   25.42    1.74
   6   7   5   26.03    1.56
   5   7   5    8.89    0.85
  -5  -7  -5    8.56    0.74
  -5  -7  -5    8.09    0.71
  -5  -7  -5    8.28    0.92
   5   7   5    6.60    0.75
  -5  -7  -5    7.13    0.87
   5   7   5    8.60    1.25
   4   7   5    1.59    0.81
  -4  -7  -5   -1.03    0.50
  -4  -7  -5   -0.97    0.46
   4   7   5   -0.37    0.39
   3   7   5    1.52    0.74
  -3  -7  -5    1.88    0.46
  -3  -7  -5    1.51    0.43
  -2  -7  -5   44.15    1.84
  -2  -7  -5   50.70    1.87
   2   7   5   47.57    2.41
   1   7   5   -1.05    0.43
  -1  -7  -5    0.17    0.25
   0  -7  -5   11.41    0.73
   0  -7  -5   11.43    0.75
  -1   7   5    1.01    0.30
   1  -7  -5    1.46    0.42
  -1   7   5    1.77    0.33
   1  -7  -5    1.40    0.42
  -1   7   5    1.25    0.42
   2  -7  -5    1.43    0.47
   2  -7  -5    1.29    0.51
  -2   7   5    0.47    0.38
   2  -7  -5    1.76    0.51
   3  -7  -5   45.90    2.25
   3  -7  -5   43.53    2.14
   3  -7  -5   45.41    2.16
   3  -7  -5   47.37    2.27
  -3   7   5   44.84    2.04
  -3   7   5   43.37    2.09
  -3   7   5   47.75    2.28
   4  -7  -5  175.38    6.76
  -4   7   5  179.00    6.50
  -4   7   5  178.84    6.84
   4  -7  -5  192.02    6.81
   4  -7  -5  174.23    6.84
  -4   7   5  175.37    6.56
   4  -7  -5  186.35    6.89
   5  -7  -5  126.96    5.33
  -5   7   5  125.69    5.06
   5  -7  -5  135.09    5.44
  -5   7   5  132.31    5.24
   5  -7  -5  128.79    5.41
  -6   7   5   28.58    1.89
   6  -7  -5   28.41    2.18
   6  -7  -5   26.46    2.10
  -7   7   5    1.16    0.83
   7  -7  -5    4.21    1.20
   7  -7  -5    1.49    0.98
   8  -7  -5    4.44    1.41
   8  -7  -5    3.77    1.26
  -8   7   5    5.60    1.13
  -9   7   5    0.83    0.93
   9  -7  -5    0.89    1.21
   9  -7  -5    0.66    1.30
  10  -7  -5    3.27    1.64
  11  -7  -5   -0.55    1.46
 -12  -6  -5    1.22    1.31
 -12  -6  -5   -0.56    1.17
  12   6   5    0.72    1.10
 -11  -6  -5    3.49    1.32
  11   6   5    6.80    1.38
 -11  -6  -5    4.55    1.42
 -10  -6  -5    0.94    1.08
 -10  -6  -5    2.15    1.13
  10   6   5    0.99    0.92
  -9  -6  -5   20.63    1.95
   9   6   5   21.21    1.81
  -9  -6  -5   22.37    1.92
  -8  -6  -5    1.95    0.93
  -8  -6  -5    2.78    0.96
   8   6   5    1.00    0.78
  -7  -6  -5    0.82    0.72
   7   6   5    2.46    0.72
  -7  -6  -5    0.99    0.77
  -7  -6  -5    0.41    0.72
   7   6   5    0.86    0.68
   6   6   5    1.12    0.62
  -6  -6  -5    0.12    0.64
   6   6   5   -0.33    0.56
  -6  -6  -5   -0.97    0.54
  -6  -6  -5   -0.41    0.61
  -6  -6  -5   -0.07    0.64
  -5  -6  -5    1.54    0.65
   5   6   5    1.39    0.85
   5   6   5    2.41    0.54
  -5  -6  -5    2.84    0.60
  -5  -6  -5    2.28    0.61
   5   6   5    2.99    0.61
  -5  -6  -5    2.56    0.70
   5   6   5    3.01    0.80
  -4  -6  -5   12.42    0.99
  -4  -6  -5   13.10    0.85
   4   6   5   10.51    0.82
   4   6   5   12.55    0.82
  -4  -6  -5   11.31    0.98
   4   6   5   12.23    1.10
   4   6   5   13.66    1.31
  -4  -6  -5   10.92    0.85
   3   6   5  155.88    6.11
  -3  -6  -5  160.13    5.60
   3   6   5  156.77    5.28
  -3  -6  -5  154.55    5.58
   3   6   5  159.02    5.59
   3   6   5  157.32    5.28
   2   6   5   53.68    2.08
  -2  -6  -5   52.07    2.05
   2   6   5   49.99    2.48
  -2  -6  -5   51.59    2.04
  -1  -6  -5   23.60    1.08
  -1  -6  -5   23.26    1.10
   1   6   5   23.81    1.16
   0  -6  -5    0.23    0.28
   0   6   5    0.51    0.21
   0   6   5    0.72    0.36
   0  -6  -5    0.45    0.30
   1  -6  -5  109.79    4.00
   1  -6  -5  111.14    3.91
  -1   6   5  106.54    3.74
   1  -6  -5  104.51    3.87
   1  -6  -5  103.64    3.98
  -1   6   5  102.14    3.75
   1  -6  -5  108.02    3.99
  -1   6   5  110.20    4.03
  -2   6   5   21.52    1.22
  -2   6   5   21.11    1.20
   2  -6  -5   22.69    1.32
  -2   6   5   22.91    1.38
   2  -6  -5   23.00    1.35
   2  -6  -5   23.57    1.32
  -2   6   5   24.39    1.22
   2  -6  -5   23.45    1.34
   3  -6  -5  105.17    4.26
  -3   6   5  106.30    4.10
  -3   6   5  104.83    4.01
  -3   6   5  108.36    4.31
   3  -6  -5  108.36    4.24
   3  -6  -5  113.00    4.32
   3  -6  -5  110.08    4.25
  -4   6   5    0.71    0.63
   4  -6  -5    0.85    0.76
   4  -6  -5    0.81    0.61
  -4   6   5   -0.52    0.56
   4  -6  -5    0.57    0.69
  -4   6   5    0.40    0.72
   4  -6  -5    0.06    0.38
  -5   6   5    4.96    1.03
   5  -6  -5    6.22    1.25
   5  -6  -5    4.78    1.19
   5  -6  -5    6.74    1.16
  -5   6   5    6.44    1.25
  -5   6   5    4.77    1.07
  -6   6   5    0.95    0.97
   6  -6  -5   -0.57    0.79
  -6   6   5   -0.58    0.68
   6  -6  -5   -0.59    0.84
  -7   6   5    2.31    0.82
   7  -6  -5    4.78    1.20
   7  -6  -5    3.32    1.05
   8  -6  -5   -0.12    0.97
   8  -6  -5   -0.15    0.95
  -8   6   5    0.62    0.78
   9  -6  -5    0.83    1.09
   9  -6  -5    1.84    1.28
  -9   6   5    0.29    0.85
  10  -6  -5   -0.58    1.25
  11  -6  -5    0.74    1.61
 -13  -5  -5    1.59    1.48
 -12  -5  -5   -0.30    1.21
 -12  -5  -5   -0.68    1.17
  11   5   5    0.06    0.99
 -11  -5  -5   -1.34    1.05
 -11  -5  -5    0.89    1.11
 -10  -5  -5    0.18    0.90
 -10  -5  -5   -1.88    0.88
  10   5   5   -0.06    0.78
  -9  -5  -5    6.99    1.37
  -9  -5  -5    5.02    1.22
  -9  -5  -5    3.79    1.11
   9   5   5    3.42    0.98
  -8  -5  -5    4.28    1.03
  -8  -5  -5    4.84    1.11
   8   5   5    5.31    1.00
  -7  -5  -5    5.59    1.09
   7   5   5    5.28    1.13
  -7  -5  -5    7.60    1.13
   7   5   5    6.13    0.97
  -7  -5  -5    6.62    1.09
   7   5   5    5.51    0.92
  -6  -5  -5   14.35    1.37
   6   5   5   16.20    1.53
  -6  -5  -5   14.95    1.36
   6   5   5   16.69    1.51
   6   5   5   14.41    1.22
   6   5   5   15.81    1.21
  -6  -5  -5   13.10    1.30
  -6  -5  -5   16.20    1.42
   5   5   5    3.90    0.80
  -5  -5  -5    4.05    0.72
   5   5   5    4.48    0.64
  -5  -5  -5    3.88    0.69
  -5  -5  -5    4.31    0.74
   5   5   5    4.89    0.97
   5   5   5    4.62    0.63
  -5  -5  -5    3.42    0.65
  -4  -5  -5   10.89    0.98
   4   5   5   11.83    1.15
  -4  -5  -5   14.73    0.94
   4   5   5   14.11    1.34
  -4  -5  -5   11.18    0.99
   4   5   5   11.06    0.84
   4   5   5   14.28    0.88
  -4  -5  -5   12.01    1.04
  -3  -5  -5    8.86    0.80
   3   5   5   10.17    0.68
  -3  -5  -5    9.79    0.76
   3   5   5   11.30    1.11
  -3  -5  -5   10.64    0.81
   3   5   5    9.24    0.91
   3   5   5    9.20    0.66
  -3  -5  -5   10.07    0.86
   2   5   5  176.31    6.11
   2   5   5  190.63    6.46
  -2  -5  -5  189.53    6.36
   2   5   5  189.45    6.13
  -2  -5  -5  190.40    6.45
  -2  -5  -5  171.37    6.40
  -2  -5  -5  179.99    6.32
  -1  -5  -5  152.13    5.37
  -1  -5  -5  150.94    5.45
  -1  -5  -5  156.24    5.48
   1   5   5  154.84    5.49
   1   5   5  157.66    5.20
  -1  -5  -5  163.72    5.43
   1   5   5  152.10    5.20
   0  -5  -5  331.06   11.75
   0  -5  -5  335.69   11.85
   0  -5  -5  360.18   11.88
   0  -5  -5  362.46   11.80
   0   5   5  360.51   11.88
   0   5   5  342.13   11.41
   0   5   5  347.03   11.40
   1  -5  -5   19.10    1.11
  -1   5   5   18.97    1.04
   1  -5  -5   19.16    1.13
   1  -5  -5   19.58    1.14
   1  -5  -5   18.47    1.17
  -1   5   5   18.25    1.22
  -1   5   5   19.27    1.00
  -2   5   5   22.91    1.30
   2  -5  -5   30.88    1.52
  -3   5   5  111.83    4.18
   3  -5  -5  120.86    4.50
   3  -5  -5  111.33    4.43
  -3   5   5  109.85    4.26
   3  -5  -5  121.55    4.51
   3  -5  -5  106.64    4.37
  -3   5   5  107.34    4.43
  -4   5   5   53.85    2.43
   4  -5  -5   54.33    2.68
   4  -5  -5   51.17    2.60
  -4   5   5   55.32    2.54
   4  -5  -5   56.62    2.68
   4  -5  -5   53.07    2.62
   4  -5  -5   53.81    2.65
  -4   5   5   54.51    2.69
  -5   5   5    0.93    0.62
   5  -5  -5    0.04    0.68
   5  -5  -5    0.26    0.67
   5  -5  -5   -0.14    0.71
   5  -5  -5    1.31    0.72
  -5   5   5    0.78    0.74
  -5   5   5    1.14    0.65
   5  -5  -5    0.98    0.68
  -6   5   5    8.12    1.24
  -6   5   5    5.71    0.98
   6  -5  -5    8.81    1.27
   6  -5  -5    6.09    1.21
   7  -5  -5    1.22    0.90
   7  -5  -5   -0.03    0.90
  -7   5   5    0.21    0.69
  -7   5   5    0.43    0.89
  -8   5   5    0.20    0.74
  -8   5   5   -1.12    0.79
   8  -5  -5   -0.24    0.88
   8  -5  -5   -1.01    0.91
   9  -5  -5    1.68    1.18
   9  -5  -5   -0.45    1.08
  10  -5  -5    2.56    1.55
  11  -5  -5    1.71    1.66
  12  -5  -5    7.14    2.23
 -13  -4  -5    1.95    1.42
 -12  -4  -5    2.51    1.35
 -12  -4  -5   -0.41    1.16
 -11  -4  -5    1.00    1.12
  11   4   5   -0.50    0.92
 -11  -4  -5    1.25    1.16
 -10  -4  -5    8.50    1.50
  10   4   5    7.43    1.29
 -10  -4  -5    8.21    1.46
  -9  -4  -5    8.36    1.35
  -9  -4  -5    5.94    1.27
   9   4   5    6.54    1.14
   8   4   5    9.50    1.21
   8   4   5   11.20    1.50
  -8  -4  -5   11.48    1.40
  -8  -4  -5   12.35    1.45
   7   4   5    3.14    0.79
  -7  -4  -5    2.79    0.88
  -7  -4  -5    4.05    0.94
  -7  -4  -5    3.09    0.94
   7   4   5    4.08    0.93
  -7  -4  -5    3.92    0.88
   7   4   5    4.22    0.86
   7   4   5    4.10    1.08
   6   4   5    1.05    0.81
   6   4   5    3.20    0.67
   6   4   5    2.14    0.64
  -6  -4  -5    1.97    0.68
  -6  -4  -5    1.60    0.70
  -6  -4  -5    2.91    0.77
  -6  -4  -5    1.28    0.66
   6   4   5    2.78    0.81
   5   4   5    2.69    0.73
   5   4   5    1.99    0.53
   5   4   5    1.86    0.74
   5   4   5    1.71    0.52
  -5  -4  -5    1.28    0.57
  -5  -4  -5    1.07    0.59
  -5  -4  -5    3.45    0.68
  -4  -4  -5   26.65    1.48
   4   4   5   25.05    1.65
   4   4   5   24.50    1.27
  -4  -4  -5   23.91    1.41
  -4  -4  -5   24.68    1.38
  -4  -4  -5   23.97    1.42
   4   4   5   23.51    1.51
   4   4   5   25.10    1.29
  -3  -4  -5   62.78    2.59
  -3  -4  -5   61.48    2.50
   3   4   5   61.99    2.39
  -3  -4  -5   63.39    2.58
  -3  -4  -5   63.41    2.59
   3   4   5   65.26    2.44
   3   4   5   63.68    2.85
   3   4   5   65.27    2.65
  -2  -4  -5   12.76    0.89
   2   4   5   13.76    0.81
  -2  -4  -5   12.88    0.90
  -2  -4  -5   13.53    0.90
   2   4   5   14.57    0.78
   2   4   5   15.70    1.03
  -2  -4  -5   14.93    0.96
  -1  -4  -5  125.85    4.56
  -1  -4  -5  124.00    4.59
  -1  -4  -5  125.32    4.61
   1   4   5  130.98    4.67
   1   4   5  127.45    4.40
   1   4   5  128.60    4.38
  -1  -4  -5  131.38    4.64
   0  -4  -5   30.38    1.48
   0  -4  -5   31.18    1.46
   0  -4  -5   32.87    1.54
   0   4   5   33.19    1.59
   0   4   5   30.37    1.34
   0  -4  -5   32.70    1.51
   0   4   5   28.94    1.36
   1  -4  -5  330.06   11.31
  -1   4   5  335.61   11.40
  -1   4   5  314.03   10.93
  -1   4   5  329.14   10.92
   1  -4  -5  349.80   11.41
   1  -4  -5  319.34   11.36
   2  -4  -5    9.03    0.89
   2  -4  -5    9.36    0.93
  -2   4   5   10.18    0.96
  -2   4   5   10.70    0.96
  -2   4   5    9.67    0.85
  -2   4   5    9.25    0.80
   2  -4  -5    8.12    0.84
   2  -4  -5    9.74    0.97
  -2   4   5   10.79    0.86
  -2   4   5    8.75    0.81
  -3   4   5   -0.19    0.38
  -3   4   5    0.17    0.57
   3  -4  -5    0.37    0.51
   3  -4  -5   -0.10    0.49
   3  -4  -5    0.40    0.51
   3  -4  -5    0.04    0.45
  -3   4   5   -0.69    0.39
  -3   4   5    0.16    0.40
  -4   4   5   76.50    3.48
   4  -4  -5   85.08    3.53
  -4   4   5   74.38    3.33
  -4   4   5   88.63    3.39
  -4   4   5   70.56    3.16
   4  -4  -5   71.71    3.39
   4  -4  -5   83.29    3.14
   4  -4  -5   75.65    3.43
   5  -4  -5   51.39    2.73
   5  -4  -5   54.89    2.48
  -5   4   5   53.09    2.80
  -5   4   5   50.68    2.51
  -5   4   5   51.53    2.63
   5  -4  -5   53.62    2.77
  -5   4   5   56.85    2.71
  -6   4   5   18.10    1.85
   6  -4  -5   23.16    1.88
   6  -4  -5   20.93    1.90
  -6   4   5   17.57    1.54
   7  -4  -5    5.12    1.22
  -7   4   5    4.10    1.13
   7  -4  -5    4.85    1.18
  -7   4   5    2.68    0.91
  -8   4   5    1.40    0.86
   8  -4  -5    2.57    1.22
   8  -4  -5    2.27    1.09
  -8   4   5    2.77    1.18
  -9   4   5    0.73    1.19
   9  -4  -5    1.10    1.17
  10  -4  -5   -1.13    1.21
  11  -4  -5    2.40    1.62
  12  -4  -5    0.12    1.73
 -13  -3  -5   -2.02    1.17
 -12  -3  -5    1.18    1.30
 -11  -3  -5    4.91    1.41
 -11  -3  -5    4.07    1.33
  11   3   5    2.45    1.13
 -10  -3  -5    2.88    1.19
 -10  -3  -5    3.70    1.19
  10   3   5    5.14    1.15
   9   3   5   19.92    2.01
   9   3   5   15.29    1.56
  -9  -3  -5   17.58    1.79
  -9  -3  -5   20.00    1.95
  -8  -3  -5    0.36    0.84
  -8  -3  -5    1.15    0.87
   8   3   5    2.25    1.13
   8   3   5    0.19    0.69
  -7  -3  -5  102.03    4.51
  -7  -3  -5  111.09    4.63
   7   3   5  101.91    4.27
   7   3   5  109.09    4.69
   7   3   5  108.23    4.35
  -7  -3  -5  113.99    4.58
   7   3   5  106.64    4.39
  -7  -3  -5   98.71    4.45
   7   3   5  104.96    4.64
   6   3   5   91.27    4.01
   6   3   5   85.63    3.65
   6   3   5   88.70    3.74
  -6  -3  -5   94.17    3.92
  -6  -3  -5   95.16    3.96
   6   3   5   96.25    4.09
   6   3   5   92.70    3.71
  -6  -3  -5   86.80    3.85
  -6  -3  -5   88.75    3.84
  -5  -3  -5   25.07    1.59
   5   3   5   26.51    1.74
   5   3   5   24.88    1.49
  -5  -3  -5   25.53    1.61
  -5  -3  -5   23.97    1.61
  -5  -3  -5   24.71    1.62
   5   3   5   27.51    1.50
   5   3   5   26.25    1.74
   5   3   5   24.10    1.44
  -4  -3  -5   52.70    2.36
  -4  -3  -5   52.34    2.41
  -4  -3  -5   50.58    2.36
   4   3   5   51.41    2.23
   4   3   5   53.97    2.47
   3   3   5   33.89    1.53
  -3  -3  -5   35.96    1.71
   3   3   5   36.53    1.79
  -3  -3  -5   33.47    1.68
  -3  -3  -5   34.74    1.66
   3   3   5   37.69    1.61
   3   3   5   32.35    1.56
   2   3   5  100.64    3.44
   2   3   5   83.39    3.27
   1   3   5  874.82   28.41
  -1  -3  -5  910.19   29.40
  -1  -3  -5  866.55   28.29
  -1  -3  -5  864.71   29.36
  -1  -3  -5  875.13   29.25
   1   3   5  874.64   29.29
   1   3   5  884.82   28.39
   1   3   5  879.88   29.32
   0   3   5    2.76    0.49
   0  -3  -5    2.07    0.50
   0   3   5    2.59    0.60
   0   3   5    2.81    0.49
   0  -3  -5    2.14    0.51
   0  -3  -5    1.86    0.51
   0  -3  -5    2.79    0.40
   0  -3  -5    2.90    0.56
   0   3   5    2.14    0.44
  -1   3   5  124.70    4.46
   1  -3  -5  120.65    4.62
   1  -3  -5  125.66    4.64
  -1   3   5  120.29    4.54
   1  -3  -5  123.05    4.32
  -1   3   5  123.42    4.69
   1  -3  -5  124.12    4.65
  -1   3   5  123.97    4.56
  -1   3   5  127.14    4.40
   1  -3  -5  121.41    4.60
   2  -3  -5   99.70    3.94
  -2   3   5   97.87    3.74
   2  -3  -5   95.10    3.89
   2  -3  -5   94.16    3.87
   2  -3  -5  101.54    3.63
   2  -3  -5   96.03    3.90
  -2   3   5   92.81    3.65
  -2   3   5  100.83    4.00
  -2   3   5  100.98    3.84
  -2   3   5  103.38    3.77
   3  -3  -5   28.80    1.50
  -3   3   5   28.44    1.63
  -3   3   5   27.61    1.73
   3  -3  -5   29.79    1.70
   3  -3  -5   26.91    1.63
  -3   3   5   29.21    1.61
  -3   3   5   29.21    1.51
   3  -3  -5   26.51    1.67
   4  -3  -5   21.66    1.58
   4  -3  -5   20.39    1.50
   4  -3  -5   20.67    1.35
  -4   3   5   22.37    1.61
  -4   3   5   22.50    1.39
   4  -3  -5   22.72    1.55
  -4   3   5   22.22    1.49
  -4   3   5   21.66    1.49
   5  -3  -5    0.95    0.76
  -5   3   5    1.34    0.61
   5  -3  -5    1.43    0.74
   5  -3  -5    1.70    0.65
   5  -3  -5    1.15    0.67
  -5   3   5    1.66    0.67
  -5   3   5    1.45    0.79
  -5   3   5    1.56    0.72
  -6   3   5    9.09    1.22
  -6   3   5    8.87    1.38
   6  -3  -5    8.55    1.27
   6  -3  -5   11.88    1.22
  -6   3   5    9.71    1.15
   6  -3  -5    9.88    1.13
   6  -3  -5    9.34    1.39
   7  -3  -5   93.86    4.54
  -7   3   5   87.18    4.49
   7  -3  -5  101.22    4.59
  -7   3   5   98.46    4.17
  -8   3   5    8.25    1.56
   8  -3  -5    7.41    1.43
   8  -3  -5    9.37    1.60
   9  -3  -5   11.27    1.80
  -9   3   5   11.60    1.84
  10  -3  -5    0.19    1.28
 -10   3   5   -0.75    1.14
 -11   3   5   11.08    2.09
  11  -3  -5   12.15    2.17
  12  -3  -5    1.18    1.82
 -13  -2  -5    3.49    1.68
 -12  -2  -5   -0.70    1.24
 -11  -2  -5   -0.76    1.11
 -11  -2  -5    0.39    1.13
  10   2   5   -0.07    0.85
 -10  -2  -5    0.01    1.03
 -10  -2  -5   -0.81    0.96
  10   2   5   -1.81    1.05
   9   2   5   -0.20    1.16
   9   2   5    0.43    0.80
  -9  -2  -5   -0.18    0.93
  -9  -2  -5    0.46    1.00
   8   2   5   30.54    2.06
  -8  -2  -5   25.61    2.13
   8   2   5   37.13    2.57
   8   2   5   36.68    2.23
  -8  -2  -5   32.69    2.28
   7   2   5   30.04    1.97
  -7  -2  -5   29.41    2.00
  -7  -2  -5   30.03    2.01
   7   2   5   31.63    2.20
   7   2   5   30.81    2.08
   7   2   5   36.89    2.05
  -7  -2  -5   32.60    2.07
  -7  -2  -5   29.67    1.68
   7   2   5   28.64    1.83
  -6  -2  -5   74.84    3.24
   6   2   5   71.28    3.27
   6   2   5   68.71    3.10
   6   2   5   65.84    2.97
   6   2   5   68.44    3.31
  -6  -2  -5   67.46    2.81
  -6  -2  -5   67.84    3.19
  -6  -2  -5   67.44    3.18
   6   2   5   66.19    3.01
   5   2   5    0.94    0.51
   5   2   5    2.15    0.69
   5   2   5    1.23    0.71
   5   2   5    0.69    0.55
  -5  -2  -5    1.60    0.58
  -5  -2  -5    0.45    0.58
  -5  -2  -5    0.09    0.34
  -5  -2  -5    1.45    0.45
  -5  -2  -5    1.74    0.62
   5   2   5    0.56    0.48
  -4  -2  -5  438.96   17.31
   4   2   5  507.21   16.75
  -4  -2  -5  487.20   17.27
   4   2   5  534.38   17.60
  -4  -2  -5  524.64   16.67
  -4  -2  -5  509.87   17.40
   4   2   5  522.74   16.80
  -4  -2  -5  554.96   17.45
   4   2   5  520.95   17.44
   4   2   5  483.82   17.27
  -3  -2  -5   80.15    3.23
  -3  -2  -5   79.73    3.27
   3   2   5   81.41    3.13
  -3  -2  -5   81.25    3.28
  -3  -2  -5   81.62    3.33
  -3  -2  -5   82.20    3.02
   3   2   5   85.71    3.39
   3   2   5   80.60    3.08
   3   2   5   82.41    3.23
  -2  -2  -5   79.30    3.29
  -2  -2  -5   88.71    3.11
   2   2   5   86.99    3.28
   2   2   5   84.47    3.13
  -2  -2  -5   94.97    3.44
  -2  -2  -5   78.12    3.26
   2   2   5   78.43    3.15
  -2  -2  -5   89.47    3.34
   2   2   5   83.59    3.38
  -1  -2  -5  442.54   14.56
   1   2   5  439.26   14.08
  -1  -2  -5  419.33   14.46
  -1  -2  -5  430.58   13.98
  -1  -2  -5  407.78   14.54
   1   2   5  422.78   14.55
  -1  -2  -5  425.02   14.54
   1   2   5  426.20   14.01
   1   2   5  423.11   14.49
   0   2   5   13.13    0.94
   0   2   5   14.22    1.10
   0  -2  -5   13.44    1.08
   0  -2  -5   11.69    0.95
   0  -2  -5   13.35    0.87
   0   2   5   14.07    0.92
   0   2   5   12.05    0.83
   0  -2  -5   11.96    0.98
  -1   2   5  506.96   16.28
  -1   2   5  502.73   16.34
   1  -2  -5  499.02   16.26
   1  -2  -5  488.47   16.88
  -1   2   5  485.11   16.82
   1  -2  -5  479.48   16.80
  -1   2   5  494.04   16.90
   1  -2  -5  505.16   16.89
   2  -2  -5  183.45    6.50
   2  -2  -5  179.20    6.82
   2  -2  -5  189.51    6.84
  -2   2   5  185.40    6.78
   2  -2  -5  181.12    6.80
   2  -2  -5  192.60    6.89
  -2   2   5  186.82    6.51
  -2   2   5  192.98    6.60
  -2   2   5  185.50    6.89
  -2   2   5  184.40    6.78
  -3   2   5    7.38    0.85
  -3   2   5    7.89    1.01
   3  -2  -5    7.18    0.85
  -3   2   5    7.16    0.95
   3  -2  -5    5.37    0.70
  -3   2   5    7.15    0.83
   3  -2  -5    7.08    0.86
  -3   2   5    7.95    0.79
   3  -2  -5    7.14    0.87
  -4   2   5   64.23    2.99
  -4   2   5   67.78    2.94
   4  -2  -5   62.30    3.05
  -4   2   5   61.35    3.06
   4  -2  -5   64.29    3.02
   4  -2  -5   66.79    3.05
  -4   2   5   67.13    2.84
   5  -2  -5    1.40    0.80
   5  -2  -5    1.94    0.65
   5  -2  -5    0.85    0.37
   5  -2  -5    2.01    0.75
  -5   2   5    1.64    0.76
   5  -2  -5    0.47    0.31
  -5   2   5    1.93    0.71
  -5   2   5    1.31    0.63
  -5   2   5    1.45    0.67
   6  -2  -5    0.45    0.59
  -6   2   5    2.20    0.94
  -6   2   5    2.25    0.77
   6  -2  -5    2.55    0.93
   6  -2  -5    1.05    0.66
   6  -2  -5    2.41    0.95
  -6   2   5    1.82    0.79
  -7   2   5   19.64    1.98
   7  -2  -5   21.31    1.98
  -7   2   5   16.17    1.60
   7  -2  -5   17.36    1.86
   8  -2  -5   52.33    3.30
  -8   2   5   50.54    3.24
  -9   2   5    1.87    1.30
   9  -2  -5    1.87    1.36
 -10   2   5   -1.24    1.17
  10  -2  -5   -0.20    1.25
 -11   2   5    1.67    1.54
  11  -2  -5   -1.33    1.26
 -12   2   5   -0.77    1.42
  12  -2  -5    1.52    1.70
 -13  -1  -5    5.42    1.82
 -12  -1  -5   -1.46    1.13
 -11  -1  -5   -0.15    1.14
  11   1   5   -3.54    1.16
  10   1   5   66.45    4.03
 -10  -1  -5   67.28    3.76
  10   1   5   62.18    3.48
 -10  -1  -5   66.05    3.86
  -9  -1  -5    7.35    1.35
  -9  -1  -5    6.61    1.34
   9   1   5    8.87    1.57
   9   1   5    7.78    1.19
   8   1   5   16.63    1.55
   8   1   5   14.71    1.77
  -8  -1  -5   17.17    1.70
   8   1   5   14.97    1.48
  -8  -1  -5   18.33    1.79
   7   1   5    3.61    0.93
  -7  -1  -5    3.81    0.91
   7   1   5    4.43    0.95
  -7  -1  -5    3.49    0.97
  -7  -1  -5    3.78    0.75
   7   1   5    3.54    0.83
   7   1   5    2.56    1.02
   7   1   5    3.57    0.83
  -7  -1  -5    2.70    0.87
   6   1   5    1.51    0.66
  -6  -1  -5    3.04    0.78
  -6  -1  -5    2.85    0.77
  -6  -1  -5    2.75    0.63
   6   1   5    2.85    0.73
   6   1   5    3.58    0.82
   6   1   5    4.37    0.86
   6   1   5    3.26    0.94
  -6  -1  -5    3.09    0.88
   5   1   5  168.71    6.19
   5   1   5  167.32    6.56
  -5  -1  -5  179.89    6.54
   5   1   5  178.68    6.52
  -5  -1  -5  168.56    6.45
  -5  -1  -5  166.43    6.09
   5   1   5  163.29    6.40
  -5  -1  -5  171.56    6.49
   5   1   5  181.02    6.27
  -4  -1  -5   13.19    1.20
  -4  -1  -5   18.33    1.13
   4   1   5   14.15    1.18
   4   1   5   17.39    1.47
  -4  -1  -5   18.55    1.34
   3   1   5   84.07    3.48
  -3  -1  -5   83.79    3.37
  -3  -1  -5   86.80    3.45
   3   1   5   79.84    3.33
  -3  -1  -5   80.05    3.14
   3   1   5   78.43    3.15
  -3  -1  -5   81.70    3.34
   3   1   5   85.90    3.25
  -3  -1  -5   84.16    3.40
  -2  -1  -5  174.19    5.99
  -2  -1  -5  138.40    5.60
   2   1   5  174.44    5.95
   2   1   5  165.94    6.02
   2   1   5  164.45    5.67
  -2  -1  -5  148.21    5.89
  -2  -1  -5  149.66    5.87
   2   1   5  168.60    5.75
  -2  -1  -5  184.86    6.05
  -1  -1  -5  502.76   17.31
  -1  -1  -5  531.16   17.34
  -1  -1  -5  509.94   17.31
   1   1   5  502.80   17.32
   1   1   5  522.32   16.76
  -1  -1  -5  498.38   17.22
   1   1   5  503.02   16.68
   1   1   5  500.31   17.27
   0   1   5   43.91    1.92
   0   1   5   43.45    1.97
   0   1   5   42.87    2.06
   0   1   5   40.18    1.81
   0  -1  -5   39.29    1.97
   0  -1  -5   43.86    2.06
   0  -1  -5   40.40    1.96
   1  -1  -5  131.50    4.98
  -1   1   5  125.46    4.94
  -1   1   5  133.72    4.73
  -1   1   5  137.64    4.83
   1  -1  -5  129.47    4.98
  -1   1   5  127.64    5.03
   1  -1  -5  134.30    5.00
   2  -1  -5  893.28   30.74
   2  -1  -5  906.48   30.63
   2  -1  -5  941.20   30.74
  -2   1   5  939.29   29.68
  -2   1   5  900.08   30.70
   2  -1  -5  879.38   29.70
  -2   1   5  917.11   30.74
  -2   1   5  925.52   29.77
  -3   1   5    0.93    0.51
  -3   1   5    1.23    0.60
  -3   1   5    0.41    0.64
   3  -1  -5    0.88    0.53
   3  -1  -5    1.10    0.55
   3  -1  -5    1.72    0.54
  -3   1   5    0.91    0.49
   3  -1  -5    0.75    0.62
  -3   1   5    0.91    0.66
  -3   1   5    2.47    0.65
   4  -1  -5  159.66    6.30
  -4   1   5  166.74    6.00
   4  -1  -5  160.24    6.30
   4  -1  -5  165.38    6.06
  -4   1   5  158.82    6.39
  -4   1   5  163.47    6.28
   5  -1  -5   18.36    1.50
   5  -1  -5   18.96    1.69
  -5   1   5   15.78    1.39
  -5   1   5   16.09    1.57
   5  -1  -5   17.46    1.56
   5  -1  -5   19.86    1.49
  -5   1   5   19.88    1.61
  -6   1   5   16.09    1.57
  -6   1   5   16.39    1.74
   6  -1  -5   14.81    1.45
   6  -1  -5   15.49    1.55
   6  -1  -5   14.88    1.42
  -6   1   5   13.32    1.32
   6  -1  -5   16.55    1.67
   7  -1  -5   22.11    2.06
  -7   1   5   19.17    1.99
   7  -1  -5   21.94    1.97
   8  -1  -5    2.74    1.34
  -8   1   5    3.33    1.34
[truncated: 319,871 more chars]
