# Supplementary material for: In Silico Molecular Docking and In Vitro Antidiabetic Studies of Dihydropyrimido[4,5-a]acridin-2-amines
Source: Biomed Res Int. 2014 Jun 2;2014:971569. doi: 10.1155/2014/971569 (PMC4060768; doi:10.1155/2014/971569)
Supplement: Supplementary file 1 — CCDC 988641 contains the supplementary crystallographic data for this paper. These data can be obtained free of charge from the Cambridge Crystallographic Data Centre via https://www.ccdc.cam.ac.uk/data-request/cif or from the Cambridge Crystallographic Data Centre, 12 Union Road, Cambridge CB2 1EZ, UK; fax: +44 1223 336033; or e-mail: deposit@ccdc.cam.ac.uk. [file 971569.f1.zip › 971569.f1/singlecrystalxrddata/ngc.res]

TITL NGC in P-1
CELL  0.71073   9.9421  10.9553  11.5126   67.248   78.530   89.875
ZERR     2.00   0.0005   0.0005   0.0005    0.002    0.002    0.002
LATT   1
SFAC  C    H    N    CL
UNIT  54   36   8    4
MERG   2
OMIT    -3.00  50.00
SIMU 0.02 0.04 CL1 CL1'
FMAP   2
PLAN   25
SIZE     0.25   0.30   0.35
ACTA
BOND   $H
CONF
L.S.   4
WGHT    0.075600    1.381600
FVAR       0.63303   0.28866
C1    1    0.313047    0.128306    0.464925    11.00000    0.09486    0.11090 =
         0.06838   -0.06760   -0.04626    0.05872
C2    1    0.392851    0.246083    0.386336    11.00000    0.10281    0.09128 =
         0.11218   -0.08049   -0.06376    0.05031
AFIX  43
H2    2    0.378949    0.321896    0.403619    11.00000   -1.20000
AFIX   0
C3    1    0.490446    0.250143    0.285008    11.00000    0.07538    0.07471 =
         0.11511   -0.06988   -0.04860    0.03064
AFIX  43
H3    2    0.546235    0.328050    0.234268    11.00000   -1.20000
AFIX   0
C4    1    0.508623    0.136007    0.255217    11.00000    0.05890    0.06239 =
         0.08571   -0.05083   -0.03657    0.02040
C5    1    0.422254    0.019961    0.329744    11.00000    0.05581    0.07174 =
         0.06586   -0.04739   -0.02591    0.02246
C6    1    0.323726    0.015693    0.439787    11.00000    0.07720    0.08233 =
         0.06158   -0.04748   -0.02916    0.03500
AFIX  43
H6    2    0.268022   -0.061521    0.493261    11.00000   -1.20000
AFIX   0
C7    1    0.436902   -0.090886    0.293230    11.00000    0.04568    0.05837 =
         0.05879   -0.03573   -0.01644    0.01082
C8    1    0.540634   -0.078636    0.188681    11.00000    0.04308    0.05330 =
         0.06254   -0.03661   -0.00961    0.00502
C9    1    0.628043    0.041220    0.124895    11.00000    0.04874    0.05355 =
         0.07778   -0.03942   -0.01491    0.00358
C10   1    0.744651    0.053181    0.015605    11.00000    0.05094    0.04987 =
         0.08463   -0.03409    0.00277   -0.00725
AFIX  23
H10A  2    0.814126    0.120846    0.005100    11.00000   -1.20000
H10B  2    0.711262    0.080241   -0.063624    11.00000   -1.20000
AFIX   0
C11   1    0.808587   -0.078866    0.040822    11.00000    0.04456    0.05662 =
         0.07528   -0.04059    0.00038   -0.00698
AFIX  23
H11A  2    0.879086   -0.071807   -0.033563    11.00000   -1.20000
H11B  2    0.851213   -0.101572    0.114533    11.00000   -1.20000
AFIX   0
C12   1    0.697469   -0.185364    0.066804    11.00000    0.04241    0.04934 =
         0.05548   -0.03063   -0.00441   -0.00221
C13   1    0.566643   -0.182820    0.135619    11.00000    0.04355    0.04635 =
         0.05029   -0.02764   -0.00453   -0.00033
C14   1    0.487031   -0.357510    0.102711    11.00000    0.04456    0.04171 =
         0.05012   -0.02478   -0.00043   -0.00501
C15   1    0.713737   -0.285194    0.019645    11.00000    0.03960    0.04705 =
         0.04597   -0.02421   -0.00298    0.00028
C16   1    0.847322   -0.293787   -0.061096    11.00000    0.04164    0.04777 =
         0.05222   -0.02860   -0.00391   -0.00100
C17   1    0.968247   -0.321978   -0.018485    11.00000    0.04865    0.04468 =
         0.05304   -0.02354   -0.00862   -0.00002
C18   1    1.090792   -0.322073   -0.099625    11.00000    0.04167    0.06062 =
         0.07722   -0.03269   -0.00710    0.00293
AFIX  43
H18   2    1.170815   -0.342495   -0.068209    11.00000   -1.20000
AFIX   0
C19   1    1.092741   -0.291670   -0.226952    11.00000    0.04825    0.09752 =
         0.08143   -0.04959    0.00688    0.00438
AFIX  43
H19   2    1.175156   -0.289206   -0.283007    11.00000   -1.20000
AFIX   0
C20   1    0.974117   -0.264824   -0.272472    11.00000    0.07035    0.12116 =
         0.05994   -0.05192   -0.00448    0.01160
AFIX  43
H20   2    0.975750   -0.245800   -0.358803    11.00000   -1.20000
AFIX   0
C21   1    0.853196   -0.266068   -0.190588    11.00000    0.04922    0.09767 =
         0.05762   -0.04468   -0.01012    0.00879
AFIX  43
H21   2    0.773138   -0.247960   -0.222288    11.00000   -1.20000
AFIX   0
C22   1    0.344752   -0.213301    0.369833    11.00000    0.05288    0.06570 =
         0.04864   -0.03612   -0.00386    0.00881
C23   1    0.206337   -0.214075    0.367553    11.00000    0.05339    0.09674 =
         0.07242   -0.04459   -0.00244    0.00483
AFIX  43
H23   2    0.171493   -0.137776    0.316366    11.00000   -1.20000
AFIX   0
C24   1    0.120282   -0.326481    0.440193    11.00000    0.06511    0.12090 =
         0.09597   -0.04992    0.00942   -0.01462
AFIX  43
H24   2    0.027619   -0.327199    0.436802    11.00000   -1.20000
AFIX   0
C25   1    0.170258   -0.436697    0.517042    11.00000    0.10653    0.11254 =
         0.07913   -0.04035    0.01855   -0.03529
AFIX  43
H25   2    0.110865   -0.512449    0.566621    11.00000   -1.20000
AFIX   0
C26   1    0.305306   -0.438959    0.523250    11.00000    0.13363    0.07510 =
         0.06997   -0.02961   -0.02148    0.00612
AFIX  43
H26   2    0.338018   -0.515091    0.577111    11.00000   -1.20000
AFIX   0
C27   1    0.394382   -0.325337    0.447604    11.00000    0.07995    0.07048 =
         0.07167   -0.03668   -0.02257    0.00902
AFIX  43
H27   2    0.487320   -0.325799    0.450071    11.00000   -1.20000
AFIX   0
N1    3    0.611820    0.146310    0.153742    11.00000    0.05596    0.05362 =
         0.09706   -0.04732   -0.02425    0.01125
N2    3    0.461069   -0.267048    0.153385    11.00000    0.04251    0.04995 =
         0.05178   -0.03052   -0.00055   -0.00239
N3    3    0.609289   -0.371241    0.035997    11.00000    0.04198    0.04911 =
         0.05652   -0.03203   -0.00175   -0.00147
N4    3    0.380011   -0.443086    0.119161    11.00000    0.04380    0.05748 =
         0.08150   -0.04563    0.00744   -0.01047
AFIX  93
H4A   2    0.299816   -0.437466    0.160762    11.00000   -1.20000
H4B   2    0.392240   -0.503054    0.088006    11.00000   -1.20000
AFIX   0
PART    1
CL1   4    0.153177    0.092313    0.611953    21.00000    0.10643    0.12049 =
         0.09341   -0.08015   -0.01794    0.03844
PART    2
CL1'  4    0.205054    0.131900    0.595785   -21.00000    0.10882    0.11129 =
         0.07135   -0.06570   -0.02045    0.04072
PART    0
CL2   4    0.970590   -0.359729    0.141749    11.00000    0.08478    0.08040 =
         0.05509   -0.02286   -0.02288    0.01413
HKLF    4
 
REM  NGC in P-1
REM R1 =  0.0569 for   3119 Fo > 4sig(Fo)  and  0.0712 for all   3929 data
REM    308 parameters refined using      6 restraints
 
END  
     
WGHT      0.0756      1.3810 
REM Highest difference peak  0.383,  deepest hole -0.385,  1-sigma level  0.055
Q1    1   0.8681 -0.3793  0.1686  11.00000  0.05    0.38
Q2    1   0.1741 -0.4322  0.4432  11.00000  0.05    0.24
Q3    1   1.1080 -0.3794  0.1216  11.00000  0.05    0.20
Q4    1   1.0880 -0.4110  0.1338  11.00000  0.05    0.20
Q5    1   0.3678 -0.2469  0.4381  11.00000  0.05    0.20
Q6    1   0.2665 -0.5580  0.4785  11.00000  0.05    0.20
Q7    1   0.8953 -0.0980  0.0226  11.00000  0.05    0.20
Q8    1   0.3810 -0.4665  0.5378  11.00000  0.05    0.19
Q9    1   0.8480 -0.1584 -0.2306  11.00000  0.05    0.18
Q10   1   0.9663 -0.0849  0.1206  11.00000  0.05    0.18
Q11   1   0.2212  0.2178  0.6336  11.00000  0.05    0.18
Q12   1   0.5863 -0.3823  0.1187  11.00000  0.05    0.17
Q13   1  -0.0856 -0.2316  0.3861  11.00000  0.05    0.17
Q14   1   0.1556 -0.5557  0.4785  11.00000  0.05    0.17
Q15   1   0.0432  0.0773  0.5955  11.00000  0.05    0.16
Q16   1   0.4600  0.1975  0.3700  11.00000  0.05    0.16
Q17   1   0.2398 -0.4942  0.5576  11.00000  0.05    0.16
Q18   1   0.6518 -0.4044  0.1160  11.00000  0.05    0.16
Q19   1   0.3765 -0.2777  0.3745  11.00000  0.05    0.16
Q20   1   0.9919 -0.1379 -0.3958  11.00000  0.05    0.16
Q21   1   0.5233 -0.1160  0.2683  11.00000  0.05    0.16
Q22   1   0.8963 -0.2786  0.1579  11.00000  0.05    0.15
Q23   1   0.1351 -0.0339  0.5278  11.00000  0.05    0.15
Q24   1   0.1459  0.0054  0.3614  11.00000  0.05    0.15
Q25   1   0.3714 -0.4660  0.0367  11.00000  0.05    0.15
