# Supplementary material for: In Silico Molecular Docking and In Vitro Antidiabetic Studies of Dihydropyrimido[4,5-a]acridin-2-amines
Source: Biomed Res Int. 2014 Jun 2;2014:971569. doi: 10.1155/2014/971569 (PMC4060768; doi:10.1155/2014/971569)
Supplement: Supplementary file 1 — CCDC 988641 contains the supplementary crystallographic data for this paper. These data can be obtained free of charge from the Cambridge Crystallographic Data Centre via https://www.ccdc.cam.ac.uk/data-request/cif or from the Cambridge Crystallographic Data Centre, 12 Union Road, Cambridge CB2 1EZ, UK; fax: +44 1223 336033; or e-mail: deposit@ccdc.cam.ac.uk. [file 971569.f1.zip › 971569.f1/singlecrystalxrddata/tables.txt]

      Table 1.  Crystal data and structure refinement for ngc.
 
 
      Identification code               shelxl
 
      Empirical formula                 C27 H18 Cl2 N4
 
      Formula weight                    469.35
 
      Temperature                       293(2) K
 
      Wavelength                        0.71073 A
 
      Crystal system, space group       Triclinic,  P-1
 
      Unit cell dimensions              a = 9.9421(5) A   alpha = 67.248(2) deg.
                                        b = 10.9553(5) A    beta = 78.530(2) deg.
                                        c = 11.5126(5) A   gamma = 89.875(2) deg.
 
      Volume                            1129.39(9) A^3
 
      Z, Calculated density             2,  1.380 Mg/m^3
 
      Absorption coefficient            0.311 mm^-1
 
      F(000)                            484
 
      Crystal size                      0.35 x 0.30 x 0.25 mm
 
      Theta range for data collection   1.96 to 25.00 deg.
 
      Limiting indices                  -11<=h<=11, -12<=k<=12, -13<=l<=13
 
      Reflections collected / unique    19503 / 3929 [R(int) = 0.0276]
 
      Completeness to theta = 25.00     98.8 %
 
      Absorption correction             Semi-empirical from equivalents
 
      Max. and min. transmission        0.9635 and 0.8623
 
      Refinement method                 Full-matrix least-squares on F^2
 
      Data / restraints / parameters    3929 / 6 / 308
 
      Goodness-of-fit on F^2            1.200
 
      Final R indices [I>2sigma(I)]     R1 = 0.0569, wR2 = 0.1944
 
      R indices (all data)              R1 = 0.0712, wR2 = 0.2074
 
      Largest diff. peak and hole       0.383 and -0.385 e.A^-3
 
         Table 2.  Atomic coordinates ( x 10^4) and equivalent isotropic
         displacement parameters (A^2 x 10^3) for ngc.
         U(eq) is defined as one third of the trace of the orthogonalized
         Uij tensor.
 
         ________________________________________________________________
 
                         x             y             z           U(eq)
         ________________________________________________________________
 
          C(1)         3130(6)       1283(6)       4649(5)       77(2)
          C(2)         3929(6)       2461(6)       3863(6)       83(2)
          C(3)         4904(5)       2501(5)       2850(5)       74(1)
          C(4)         5086(4)       1360(4)       2552(4)       59(1)
          C(5)         4223(4)        200(4)       3297(4)       56(1)
          C(6)         3237(5)        157(5)       4398(4)       66(1)
          C(7)         4369(4)       -909(4)       2932(4)       50(1)
          C(8)         5406(4)       -786(4)       1887(4)       49(1)
          C(9)         6280(4)        412(4)       1249(4)       56(1)
          C(10)        7447(4)        532(4)        156(4)       62(1)
          C(11)        8086(4)       -789(4)        408(4)       56(1)
          C(12)        6975(4)      -1854(4)        668(4)       47(1)
          C(13)        5666(3)      -1828(3)       1356(3)       45(1)
          C(14)        4870(3)      -3575(3)       1027(3)       45(1)
          C(15)        7137(3)      -2852(3)        196(3)       43(1)
          C(16)        8473(3)      -2938(3)       -611(3)       45(1)
          C(17)        9682(4)      -3220(3)       -185(4)       48(1)
          C(18)       10908(4)      -3221(4)       -996(4)       59(1)
          C(19)       10927(4)      -2917(5)      -2270(5)       74(1)
          C(20)        9741(5)      -2648(6)      -2725(5)       80(1)
          C(21)        8532(4)      -2661(5)      -1906(4)       64(1)
          C(22)        3448(4)      -2133(4)       3698(4)       53(1)
          C(23)        2063(4)      -2141(5)       3676(5)       72(1)
          C(24)        1203(6)      -3265(7)       4402(6)       96(2)
          C(25)        1703(8)      -4367(7)       5170(6)      104(2)
          C(26)        3053(7)      -4390(6)       5232(5)       93(2)
          C(27)        3944(5)      -3253(5)       4476(5)       70(1)
          N(1)         6118(3)       1463(3)       1537(4)       62(1)
          N(2)         4611(3)      -2670(3)       1534(3)       46(1)
          N(3)         6093(3)      -3712(3)        360(3)       47(1)
          N(4)         3800(3)      -4431(3)       1192(3)       58(1)
          Cl(1)        1530(50)       920(40)      6120(20)      96(5)
          Cl(1')       2050(20)      1319(16)      5958(8)       88(3)
          Cl(2)        9706(1)      -3597(1)       1418(1)       74(1)
         ________________________________________________________________
 
           Table 3.  Bond lengths [A] and angles [deg] for ngc.
           _____________________________________________________________
 
            C(1)-C(6)                     1.371(6)
            C(1)-C(2)                     1.389(8)
            C(1)-Cl(1')                   1.681(11)
            C(1)-Cl(1)                    1.99(4)
            C(2)-C(3)                     1.347(7)
            C(2)-H(2)                     0.9300
            C(3)-C(4)                     1.421(5)
            C(3)-H(3)                     0.9300
            C(4)-N(1)                     1.361(6)
            C(4)-C(5)                     1.399(6)
            C(5)-C(6)                     1.424(6)
            C(5)-C(7)                     1.429(5)
            C(6)-H(6)                     0.9300
            C(7)-C(8)                     1.383(5)
            C(7)-C(22)                    1.478(6)
            C(8)-C(9)                     1.423(5)
            C(8)-C(13)                    1.489(5)
            C(9)-N(1)                     1.317(5)
            C(9)-C(10)                    1.496(6)
            C(10)-C(11)                   1.525(6)
            C(10)-H(10A)                  0.9700
            C(10)-H(10B)                  0.9700
            C(11)-C(12)                   1.508(5)
            C(11)-H(11A)                  0.9700
            C(11)-H(11B)                  0.9700
            C(12)-C(13)                   1.388(5)
            C(12)-C(15)                   1.393(5)
            C(13)-N(2)                    1.330(4)
            C(14)-N(2)                    1.332(4)
            C(14)-N(3)                    1.344(4)
            C(14)-N(4)                    1.354(4)
            C(15)-N(3)                    1.339(4)
            C(15)-C(16)                   1.488(5)
            C(16)-C(17)                   1.377(5)
            C(16)-C(21)                   1.390(5)
            C(17)-C(18)                   1.380(5)
            C(17)-Cl(2)                   1.732(4)
            C(18)-C(19)                   1.368(6)
            C(18)-H(18)                   0.9300
            C(19)-C(20)                   1.370(7)
            C(19)-H(19)                   0.9300
            C(20)-C(21)                   1.369(6)
            C(20)-H(20)                   0.9300
            C(21)-H(21)                   0.9300
            C(22)-C(27)                   1.369(6)
            C(22)-C(23)                   1.382(6)
            C(23)-C(24)                   1.368(8)
            C(23)-H(23)                   0.9300
            C(24)-C(25)                   1.354(9)
            C(24)-H(24)                   0.9300
            C(25)-C(26)                   1.358(9)
            C(25)-H(25)                   0.9300
            C(26)-C(27)                   1.397(7)
            C(26)-H(26)                   0.9300
            C(27)-H(27)                   0.9300
            N(4)-H(4A)                    0.8600
            N(4)-H(4B)                    0.8600
 
            C(6)-C(1)-C(2)              122.6(5)
            C(6)-C(1)-Cl(1')            122.1(9)
            C(2)-C(1)-Cl(1')            115.3(8)
            C(6)-C(1)-Cl(1)             107.1(14)
            C(2)-C(1)-Cl(1)             129.8(13)
            Cl(1')-C(1)-Cl(1)            17.0(7)
            C(3)-C(2)-C(1)              119.8(4)
            C(3)-C(2)-H(2)              120.1
            C(1)-C(2)-H(2)              120.1
            C(2)-C(3)-C(4)              120.4(5)
            C(2)-C(3)-H(3)              119.8
            C(4)-C(3)-H(3)              119.8
            N(1)-C(4)-C(5)              123.2(3)
            N(1)-C(4)-C(3)              117.1(4)
            C(5)-C(4)-C(3)              119.7(4)
            C(4)-C(5)-C(6)              119.1(4)
            C(4)-C(5)-C(7)              118.7(4)
            C(6)-C(5)-C(7)              122.2(4)
            C(1)-C(6)-C(5)              118.3(5)
            C(1)-C(6)-H(6)              120.8
            C(5)-C(6)-H(6)              120.8
            C(8)-C(7)-C(5)              117.5(4)
            C(8)-C(7)-C(22)             123.2(3)
            C(5)-C(7)-C(22)             119.3(3)
            C(7)-C(8)-C(9)              118.9(3)
            C(7)-C(8)-C(13)             124.2(3)
            C(9)-C(8)-C(13)             116.8(3)
            N(1)-C(9)-C(8)              124.1(4)
            N(1)-C(9)-C(10)             116.4(3)
            C(8)-C(9)-C(10)             119.4(3)
            C(9)-C(10)-C(11)            110.7(3)
            C(9)-C(10)-H(10A)           109.5
            C(11)-C(10)-H(10A)          109.5
            C(9)-C(10)-H(10B)           109.5
            C(11)-C(10)-H(10B)          109.5
            H(10A)-C(10)-H(10B)         108.1
            C(12)-C(11)-C(10)           109.0(3)
            C(12)-C(11)-H(11A)          109.9
            C(10)-C(11)-H(11A)          109.9
            C(12)-C(11)-H(11B)          109.9
            C(10)-C(11)-H(11B)          109.9
            H(11A)-C(11)-H(11B)         108.3
            C(13)-C(12)-C(15)           115.8(3)
            C(13)-C(12)-C(11)           119.7(3)
            C(15)-C(12)-C(11)           124.3(3)
            N(2)-C(13)-C(12)            123.0(3)
            N(2)-C(13)-C(8)             117.8(3)
            C(12)-C(13)-C(8)            119.1(3)
            N(2)-C(14)-N(3)             126.1(3)
            N(2)-C(14)-N(4)             117.0(3)
            N(3)-C(14)-N(4)             116.9(3)
            N(3)-C(15)-C(12)            122.4(3)
            N(3)-C(15)-C(16)            116.7(3)
            C(12)-C(15)-C(16)           120.7(3)
            C(17)-C(16)-C(21)           117.0(3)
            C(17)-C(16)-C(15)           124.8(3)
            C(21)-C(16)-C(15)           118.2(3)
            C(16)-C(17)-C(18)           122.2(4)
            C(16)-C(17)-Cl(2)           120.3(3)
            C(18)-C(17)-Cl(2)           117.5(3)
            C(19)-C(18)-C(17)           119.0(4)
            C(19)-C(18)-H(18)           120.5
            C(17)-C(18)-H(18)           120.5
            C(18)-C(19)-C(20)           120.5(4)
            C(18)-C(19)-H(19)           119.8
            C(20)-C(19)-H(19)           119.8
            C(21)-C(20)-C(19)           119.8(4)
            C(21)-C(20)-H(20)           120.1
            C(19)-C(20)-H(20)           120.1
            C(20)-C(21)-C(16)           121.5(4)
            C(20)-C(21)-H(21)           119.2
            C(16)-C(21)-H(21)           119.2
            C(27)-C(22)-C(23)           119.3(4)
            C(27)-C(22)-C(7)            120.4(4)
            C(23)-C(22)-C(7)            120.2(4)
            C(24)-C(23)-C(22)           120.3(5)
            C(24)-C(23)-H(23)           119.8
            C(22)-C(23)-H(23)           119.8
            C(25)-C(24)-C(23)           119.9(6)
            C(25)-C(24)-H(24)           120.1
            C(23)-C(24)-H(24)           120.1
            C(24)-C(25)-C(26)           121.4(6)
            C(24)-C(25)-H(25)           119.3
            C(26)-C(25)-H(25)           119.3
            C(25)-C(26)-C(27)           119.1(6)
            C(25)-C(26)-H(26)           120.5
            C(27)-C(26)-H(26)           120.5
            C(22)-C(27)-C(26)           119.9(5)
            C(22)-C(27)-H(27)           120.0
            C(26)-C(27)-H(27)           120.0
            C(9)-N(1)-C(4)              117.3(4)
            C(13)-N(2)-C(14)            116.4(3)
            C(15)-N(3)-C(14)            116.2(3)
            C(14)-N(4)-H(4A)            120.0
            C(14)-N(4)-H(4B)            120.0
            H(4A)-N(4)-H(4B)            120.0
           _____________________________________________________________
 
           Symmetry transformations used to generate equivalent atoms:
 
 
    Table 4.  Anisotropic displacement parameters (A^2 x 10^3) for ngc.
    The anisotropic displacement factor exponent takes the form:
    -2 pi^2 [ h^2 a*^2 U11 + ... + 2 h k a* b* U12 ]
 
    _______________________________________________________________________
 
              U11        U22        U33        U23        U13        U12
    _______________________________________________________________________
 
    C(1)     95(3)     111(4)      68(3)     -68(3)     -46(3)      59(3)
    C(2)    103(4)      91(4)     112(4)     -80(4)     -64(3)      50(3)
    C(3)     75(3)      75(3)     115(4)     -70(3)     -49(3)      31(2)
    C(4)     59(2)      62(2)      86(3)     -51(2)     -37(2)      20(2)
    C(5)     56(2)      72(3)      66(3)     -47(2)     -26(2)      22(2)
    C(6)     77(3)      82(3)      62(3)     -47(2)     -29(2)      35(2)
    C(7)     46(2)      58(2)      59(2)     -36(2)     -16(2)      11(2)
    C(8)     43(2)      53(2)      63(2)     -37(2)     -10(2)       5(2)
    C(9)     49(2)      54(2)      78(3)     -39(2)     -15(2)       4(2)
    C(10)    51(2)      50(2)      85(3)     -34(2)       3(2)      -7(2)
    C(11)    45(2)      57(2)      75(3)     -41(2)       0(2)      -7(2)
    C(12)    42(2)      49(2)      55(2)     -31(2)      -4(2)      -2(2)
    C(13)    44(2)      46(2)      50(2)     -28(2)      -5(2)       0(2)
    C(14)    45(2)      42(2)      50(2)     -25(2)       0(2)      -5(1)
    C(15)    40(2)      47(2)      46(2)     -24(2)      -3(2)       0(1)
    C(16)    42(2)      48(2)      52(2)     -29(2)      -4(2)      -1(2)
    C(17)    49(2)      45(2)      53(2)     -24(2)      -9(2)       0(2)
    C(18)    42(2)      61(2)      77(3)     -33(2)      -7(2)       3(2)
    C(19)    48(2)      98(4)      81(3)     -50(3)       7(2)       4(2)
    C(20)    70(3)     121(4)      60(3)     -52(3)      -4(2)      12(3)
    C(21)    49(2)      98(3)      58(2)     -45(2)     -10(2)       9(2)
    C(22)    53(2)      66(2)      49(2)     -36(2)      -4(2)       9(2)
    C(23)    53(3)      97(4)      72(3)     -45(3)      -2(2)       5(2)
    C(24)    65(3)     121(5)      96(4)     -50(4)       9(3)     -15(3)
    C(25)   107(5)     113(5)      79(4)     -40(4)      19(4)     -35(4)
    C(26)   134(5)      75(3)      70(3)     -30(3)     -21(3)       6(3)
    C(27)    80(3)      70(3)      72(3)     -37(2)     -23(2)       9(2)
    N(1)     56(2)      54(2)      97(3)     -47(2)     -24(2)      11(2)
    N(2)     43(2)      50(2)      52(2)     -31(1)      -1(1)      -2(1)
    N(3)     42(2)      49(2)      57(2)     -32(1)      -2(1)      -2(1)
    N(4)     44(2)      58(2)      82(2)     -46(2)       7(2)     -11(1)
    Cl(1)   106(12)    120(10)     93(5)     -80(6)     -18(7)      38(9)
    Cl(1')  109(5)     111(4)      71(2)     -66(3)     -20(2)      41(4)
    Cl(2)    85(1)      80(1)      55(1)     -23(1)     -23(1)      14(1)
    _______________________________________________________________________
 
         Table 5.  Hydrogen coordinates ( x 10^4) and isotropic
         displacement parameters (A^2 x 10^3) for ngc.
 
         ________________________________________________________________
 
                         x             y             z           U(eq)
         ________________________________________________________________
 
          H(2)         3789          3219          4036         100
          H(3)         5462          3281          2343          89
          H(6)         2680          -615          4933          79
          H(10A)       8141          1208            51          74
          H(10B)       7113           802          -636          74
          H(11A)       8791          -718          -336          68
          H(11B)       8512         -1016          1145          68
          H(18)       11708         -3425          -682          71
          H(19)       11752         -2892         -2830          89
          H(20)        9758         -2458         -3588          96
          H(21)        7731         -2480         -2223          77
          H(23)        1715         -1378          3164          87
          H(24)         276         -3272          4368         115
          H(25)        1109         -5124          5666         125
          H(26)        3380         -5151          5771         111
          H(27)        4873         -3258          4501          84
          H(4A)        2998         -4375          1608          70
          H(4B)        3922         -5031           880          70
         ________________________________________________________________
 
         Table 6.  Selected torsion angles [deg] for ngc.
         ________________________________________________________________
 
         ________________________________________________________________
 
         Symmetry transformations used to generate equivalent atoms:
 
 
         Table 7.  Torsion angles [deg] for ngc.
         ________________________________________________________________
 
          C(6)-C(1)-C(2)-C(3)                                  -3.8(7)
          Cl(1')-C(1)-C(2)-C(3)                               174.6(6)
          Cl(1)-C(1)-C(2)-C(3)                               -174.8(12)
          C(1)-C(2)-C(3)-C(4)                                   2.4(7)
          C(2)-C(3)-C(4)-N(1)                                -178.2(4)
          C(2)-C(3)-C(4)-C(5)                                   1.6(6)
          N(1)-C(4)-C(5)-C(6)                                 175.4(4)
          C(3)-C(4)-C(5)-C(6)                                  -4.3(6)
          N(1)-C(4)-C(5)-C(7)                                  -4.0(6)
          C(3)-C(4)-C(5)-C(7)                                 176.2(4)
          C(2)-C(1)-C(6)-C(5)                                   1.0(6)
          Cl(1')-C(1)-C(6)-C(5)                              -177.3(6)
          Cl(1)-C(1)-C(6)-C(5)                                173.8(8)
          C(4)-C(5)-C(6)-C(1)                                   3.0(6)
          C(7)-C(5)-C(6)-C(1)                                -177.5(4)
          C(4)-C(5)-C(7)-C(8)                                   2.8(5)
          C(6)-C(5)-C(7)-C(8)                                -176.7(4)
          C(4)-C(5)-C(7)-C(22)                               -179.0(3)
          C(6)-C(5)-C(7)-C(22)                                  1.6(6)
          C(5)-C(7)-C(8)-C(9)                                   1.1(5)
          C(22)-C(7)-C(8)-C(9)                               -177.1(4)
          C(5)-C(7)-C(8)-C(13)                               -177.9(3)
          C(22)-C(7)-C(8)-C(13)                                 4.0(6)
          C(7)-C(8)-C(9)-N(1)                                  -4.4(6)
          C(13)-C(8)-C(9)-N(1)                                174.6(4)
          C(7)-C(8)-C(9)-C(10)                                177.2(4)
          C(13)-C(8)-C(9)-C(10)                                -3.8(5)
          N(1)-C(9)-C(10)-C(11)                               144.9(4)
          C(8)-C(9)-C(10)-C(11)                               -36.5(5)
          C(9)-C(10)-C(11)-C(12)                               55.0(5)
          C(10)-C(11)-C(12)-C(13)                             -36.9(5)
          C(10)-C(11)-C(12)-C(15)                             139.2(4)
          C(15)-C(12)-C(13)-N(2)                               -1.9(6)
          C(11)-C(12)-C(13)-N(2)                              174.6(4)
          C(15)-C(12)-C(13)-C(8)                             -179.7(3)
          C(11)-C(12)-C(13)-C(8)                               -3.3(5)
          C(7)-C(8)-C(13)-N(2)                                 26.3(6)
          C(9)-C(8)-C(13)-N(2)                               -152.6(4)
          C(7)-C(8)-C(13)-C(12)                              -155.7(4)
          C(9)-C(8)-C(13)-C(12)                                25.3(5)
          C(13)-C(12)-C(15)-N(3)                                1.9(6)
          C(11)-C(12)-C(15)-N(3)                             -174.3(4)
          C(13)-C(12)-C(15)-C(16)                             176.9(3)
          C(11)-C(12)-C(15)-C(16)                               0.7(6)
          N(3)-C(15)-C(16)-C(17)                             -118.8(4)
          C(12)-C(15)-C(16)-C(17)                              65.9(5)
          N(3)-C(15)-C(16)-C(21)                               64.0(5)
          C(12)-C(15)-C(16)-C(21)                            -111.3(4)
          C(21)-C(16)-C(17)-C(18)                               0.5(5)
          C(15)-C(16)-C(17)-C(18)                            -176.7(3)
          C(21)-C(16)-C(17)-Cl(2)                            -179.2(3)
          C(15)-C(16)-C(17)-Cl(2)                               3.6(5)
          C(16)-C(17)-C(18)-C(19)                               0.8(6)
          Cl(2)-C(17)-C(18)-C(19)                            -179.5(3)
          C(17)-C(18)-C(19)-C(20)                              -1.6(7)
          C(18)-C(19)-C(20)-C(21)                               1.2(8)
          C(19)-C(20)-C(21)-C(16)                               0.2(8)
          C(17)-C(16)-C(21)-C(20)                              -1.0(6)
          C(15)-C(16)-C(21)-C(20)                             176.4(4)
          C(8)-C(7)-C(22)-C(27)                                69.8(5)
          C(5)-C(7)-C(22)-C(27)                              -108.4(4)
          C(8)-C(7)-C(22)-C(23)                              -112.8(4)
          C(5)-C(7)-C(22)-C(23)                                69.0(5)
          C(27)-C(22)-C(23)-C(24)                              -1.4(7)
          C(7)-C(22)-C(23)-C(24)                             -178.8(4)
          C(22)-C(23)-C(24)-C(25)                               1.5(8)
          C(23)-C(24)-C(25)-C(26)                              -0.5(9)
          C(24)-C(25)-C(26)-C(27)                              -0.6(9)
          C(23)-C(22)-C(27)-C(26)                               0.2(6)
          C(7)-C(22)-C(27)-C(26)                              177.6(4)
          C(25)-C(26)-C(27)-C(22)                               0.8(8)
          C(8)-C(9)-N(1)-C(4)                                   3.3(6)
          C(10)-C(9)-N(1)-C(4)                               -178.2(4)
          C(5)-C(4)-N(1)-C(9)                                   1.0(6)
          C(3)-C(4)-N(1)-C(9)                                -179.3(4)
          C(12)-C(13)-N(2)-C(14)                                0.9(5)
          C(8)-C(13)-N(2)-C(14)                               178.8(3)
          N(3)-C(14)-N(2)-C(13)                                 0.1(6)
          N(4)-C(14)-N(2)-C(13)                              -179.4(3)
          C(12)-C(15)-N(3)-C(14)                               -1.0(5)
          C(16)-C(15)-N(3)-C(14)                             -176.2(3)
          N(2)-C(14)-N(3)-C(15)                                -0.1(6)
          N(4)-C(14)-N(3)-C(15)                               179.5(3)
         ________________________________________________________________
 
         Symmetry transformations used to generate equivalent atoms:
 
 
